# Supplementary material for: Amine-catalyzed site- and stereo-selective coupling of epoxy amines and carbon dioxide to construct oxazolidinones
Source: Royal Society of Chemistry journal article supplement (doi:10.1039/d2qo00583b), 2022-01-01
Supplement: d2qo00583b1.pdf [file d2qo00583b1.pdf]

## Supporting Information

### **Amine-catalyzed site- and stereo-selective coupling of epoxy amine and carbon dioxide to construct oxazolidinones**

Wenqin Qiu, Feng Jin, Yanhong Hao, Xiaoguang Bao,\* Dan Yuan,\* Yingming Yao\*

Key Laboratory of Organic Synthesis of Jiangsu Province, College of Chemistry, Chemical Engineering and Materials Science, Soochow University, Suzhou 215123, China.

## Table of Contents

|                                                                          |     |
|--------------------------------------------------------------------------|-----|
| 1. General information. ....                                             | 1   |
| 2. Synthesis and characterization of epoxy amines. ....                  | 1   |
| 3. Coupling reactions between epoxy amines and CO <sub>2</sub> . ....    | 8   |
| 4. Kinetic study .....                                                   | 23  |
| 5. Control experiment. ....                                              | 29  |
| 6. DFT study. ....                                                       | 30  |
| 7. X-ray crystallographic data. ....                                     | 63  |
| 8. <sup>1</sup> H, <sup>13</sup> C and <sup>19</sup> F NMR spectra. .... | 64  |
| 9. HPLC spectra. ....                                                    | 110 |
| 10. Reference .....                                                      | 114 |

## 1. General information.

NMR spectra were recorded on a Bruker AVANCE III HD-400 spectrometer. X-ray crystallographic data were collected with an AXS D8 X-ray diffractometer. High resolution mass spectra (HRMS) were obtained on Bruker ESI-QTOF LC/MS instrument (source type: ESI; mass analyzer type: TOF) and Water EI-GCT-TOF MS. All starting materials were purchased from Tianping Epistar, Aladdin, Enox, and used as received.

## 2. Synthesis and characterization of epoxy amines.

**Scheme S1** Preparation of epoxy amine **1**.

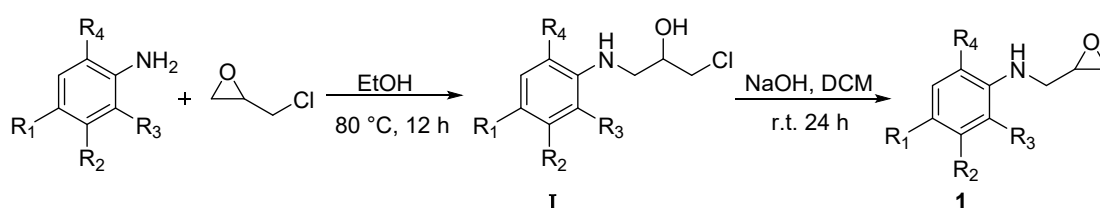

Following reported procedures,<sup>1</sup> aniline (20.0 mmol) and epichlorohydrin (22.0 mmol) were dissolved in ethanol (50 mL). The mixture was heated under reflux for 12 hours. After reaction, all volatiles were removed in vacuo, and the γ-chloro-β-hydroxyaniline **I** was isolated by column chromatography (eluent: petroleum ether: ethyl acetate, from 100: 0 to 80: 20). It was then dissolved in dichloromethane (100 mL), and a 0.3 M sodium hydroxide aqueous solution (100 mL) was added. After overnight reaction at room temperature, the organic layer was separated, washed with brine (3 × 100 mL) and dried over Na<sub>2</sub>SO<sub>4</sub>. Epoxy amine was obtained after removal of solvent.

### Characterization data

*N*-(oxiran-2-ylmethyl)aniline (**1a**)<sup>1</sup> <sup>1</sup>H NMR (400 MHz, CDCl<sub>3</sub>) δ 7.24 – 7.15 (m, 2H, Ar-H), 6.76 – 6.72 (m, 1H, Ar-H), 6.69 – 6.61 (m, 2H, Ar-H), 3.94 (s, 1H, NH),

3.60 – 3.49 (m, 1H, NCHH), 3.30 – 3.18 (m, 2H, NCHH+CH), 2.86 – 2.79 (m, 1H, OCHH), 2.71 (dd,  $J = 4.8, 2.4$  Hz, 1H, OCHH).

**4-fluoro-*N*-(oxiran-2-ylmethyl)aniline (1b)**<sup>1</sup> <sup>1</sup>H NMR (400 MHz, CDCl<sub>3</sub>) δ 6.93 – 6.86 (m, 2H, Ar-H), 6.61 – 6.55 (m, 2H, Ar-H), 3.76 (s, 1H, NH), 3.55 – 3.46 (m, 1H, NCHH), 3.24 – 3.11 (m, 2H, NCHH+CH), 2.82 (dd,  $J = 4.9, 3.8$  Hz, 1H, OCHH), 2.69 (dd,  $J = 4.9, 2.4$  Hz, 1H, OCHH).

**4-chloro-*N*-(oxiran-2-ylmethyl)aniline (1c)**<sup>1</sup> <sup>1</sup>H NMR (400 MHz, CDCl<sub>3</sub>) δ 7.17 – 7.08 (m, 2H, Ar-H), 6.59 – 6.51 (m, 2H, Ar-H), 3.92 (s, 1H, NH), 3.56 – 3.46 (m, 1H, NCHH), 3.17 (d,  $J = 11.8$  Hz, 2H, NCHH+CH), 2.81 (t,  $J = 4.3$  Hz, 1H, OCHH), 2.67 (dd,  $J = 5.1, 2.0$  Hz, 1H, OCHH).

**4-bromo-*N*-(oxiran-2-ylmethyl)aniline (1d)**<sup>1</sup> <sup>1</sup>H NMR (400 MHz, CDCl<sub>3</sub>) δ 7.28 – 7.23 (m, 2H, Ar-H), 6.55 – 6.48 (m, 2H, Ar-H), 3.91 (s, 1H, NH), 3.57 – 3.48 (m, 1H, NCHH), 3.23 – 3.13 (m, 2H, NCHH+CH), 2.84 – 2.78 (m, 1H, OCHH), 2.70 – 2.64 (m, 1H, OCHH).

**4-nitro-*N*-(oxiran-2-ylmethyl)aniline (1e)**<sup>1</sup> <sup>1</sup>H NMR (400 MHz, CDCl<sub>3</sub>) δ 8.15 – 8.01 (m, 2H, Ar-H), 6.66 – 6.53 (m, 2H, Ar-H), 4.79 (s, 1H, NH), 3.74 – 3.64 (m, 1H, NCHH), 3.38 – 3.26 (m, 1H, NCHH), 3.25 – 3.18 (m, 1H, CH), 2.85 (t,  $J = 4.3$  Hz, 1H, OCHH), 2.67 (dd,  $J = 4.8, 2.6$  Hz, 1H, OCHH). <sup>13</sup>C NMR (101 MHz, CDCl<sub>3</sub>) δ 153.4, 138.3, 126.4, 111.4 (Ar-C), 50.5 (NCH<sub>2</sub>), 45.1 (CH), 44.4 (OCH<sub>2</sub>). HRMS (ESI)  $m/z$ : [M+Na]<sup>+</sup> Calcd for C<sub>9</sub>H<sub>10</sub>N<sub>2</sub>O<sub>3</sub>Na 217.0589; Found 217.0575.

***N*-(oxiran-2-ylmethyl)-4-(trifluoromethyl)aniline (1f)**<sup>1</sup> <sup>1</sup>H NMR (400 MHz, CDCl<sub>3</sub>) δ 7.46 – 7.36 (m, 2H, Ar-H), 6.70 – 6.60 (m, 2H, Ar-H), 4.21 (s, 1H, NH), 3.60 (dd,  $J = 13.9, 2.6$  Hz, 1H, NCHH), 3.32 – 3.12 (m, 2H, NCHH+CH), 2.84 (t,  $J = 4.4$  Hz, 1H, OCHH), 2.68 (dd,  $J = 4.9, 2.6$  Hz, 1H, OCHH). <sup>13</sup>C NMR (101 MHz, CDCl<sub>3</sub>) δ 150.5 (Ar-C), 126.8 (t,  $J = 3.8$  Hz) (Ar-C), 129.1 – 123.7 (d,  $J = 271.7$  Hz) (CF<sub>3</sub>), 119.4 (q,  $J = 32.4$  Hz) (Ar-C), 112.2 (Ar-C), 50.8 (NCH<sub>2</sub>), 45.3 (CH), 44.5 (OCH<sub>2</sub>). <sup>19</sup>F NMR (376 MHz, CDCl<sub>3</sub>) δ -61.13. HRMS (ESI)  $m/z$ : [M+H]<sup>+</sup> Calcd for C<sub>10</sub>H<sub>11</sub>F<sub>3</sub>NO 218.0794; Found 218.0779.

**4-methyl-*N*-(oxiran-2-ylmethyl)aniline (1g)**<sup>1</sup> <sup>1</sup>H NMR (400 MHz, CDCl<sub>3</sub>) δ 7.06 – 6.97 (m, 2H, Ar-H), 6.62 – 6.56 (m, 2H, Ar-H), 3.77 (s, 1H, NH), 3.58 – 3.46 (m, 1H, NCHH), 3.27 – 3.16 (m, 2H, NCHH+CH), 2.82 (dd, *J* = 4.9, 3.8 Hz, 1H, OCHH), 2.70 (dd, *J* = 5.0, 2.4 Hz, 1H, OCHH), 2.26 (s, 3H, CH<sub>3</sub>).

**4-(*tert*-butyl)-*N*-(oxiran-2-ylmethyl)aniline (1h)** <sup>1</sup>H NMR (400 MHz, CDCl<sub>3</sub>) δ 7.31 – 7.21 (m, 2H, Ar-H), 6.69 – 6.59 (m, 2H, Ar-H), 3.80 (s, 1H, NH), 3.60 – 3.48 (m, 1H, NCHH), 3.32 – 3.20 (m, 2H, NCHH+CH), 2.84 (t, *J* = 4.3 Hz, 1H, OCHH), 2.73 (dd, *J* = 5.0, 2.2 Hz, 1H, OCHH), 1.32 (s, 9H, C(CH<sub>3</sub>)<sub>3</sub>). <sup>13</sup>C NMR (101 MHz, CDCl<sub>3</sub>) δ 145.5, 140.7, 126.1, 112.8 (Ar-C), 51.2 (NCH<sub>2</sub>), 45.4 (CH), 45.4 (OCH<sub>2</sub>), 33.9 (C(CH<sub>3</sub>)<sub>3</sub>), 31.6 (CH<sub>3</sub>). HRMS (ESI) *m/z*: [M+H]<sup>+</sup> Calcd for C<sub>13</sub>H<sub>20</sub>NO 206.1545; Found 206.1537.

**2-fluoro-*N*-(oxiran-2-ylmethyl)aniline (1i)** <sup>1</sup>H NMR (400 MHz, CDCl<sub>3</sub>) δ 7.04 – 6.94 (m, 2H, Ar-H), 6.78 – 6.72 (m, 1H, Ar-H), 6.69 – 6.62 (m, 1H, Ar-H), 4.15 (s, 1H, NH), 3.56 (dd, *J* = 13.9, 3.1 Hz, 1H, NCHH), 3.33 – 3.16 (m, 2H, NCHH+CH), 2.83 (dd, *J* = 5.0, 3.9 Hz, 1H, OCHH), 2.70 (dd, *J* = 4.9, 2.6 Hz, 1H, OCHH). <sup>13</sup>C NMR (101 MHz, CDCl<sub>3</sub>) δ 151.6 (d, *J* = 238.6 Hz), 136.4 (d, *J* = 11.6 Hz), 124.6 (d, *J* = 3.6 Hz), 117.2 (d, *J* = 7.0 Hz), 114.6 (d, *J* = 18.5 Hz), 112.3 (d, *J* = 3.2 Hz) (Ar-C), 50.9 (NCH<sub>2</sub>), 45.2 (CH), 44.9 (OCH<sub>2</sub>). <sup>19</sup>F NMR (376 MHz, CDCl<sub>3</sub>) δ -136.16. HRMS (ESI) *m/z*: [M+H]<sup>+</sup> Calcd for C<sub>9</sub>H<sub>11</sub>FNO 168.0825; Found 168.0839.

**2-chloro-*N*-(oxiran-2-ylmethyl)aniline (1j)** <sup>1</sup>H NMR (400 MHz, CDCl<sub>3</sub>) δ 7.32 – 7.25 (m, 1H, Ar-H), 7.21 – 7.14 (m, 1H, Ar-H), 6.78 – 6.65 (m, 2H, Ar-H), 4.56 (t, *J* = 6.1 Hz, 1H, NH), 3.66 – 3.55 (m, 1H, NCHH), 3.38 – 3.28 (m, 1H, NCHH), 3.24 (p, *J* = 3.4 Hz, 1H, CH), 2.86 (dd, *J* = 4.4, 2.7 Hz, 1H, OCHH), 2.72 (dd, *J* = 4.9, 2.7 Hz, 1H, OCHH). <sup>13</sup>C NMR (101 MHz, CDCl<sub>3</sub>) δ 143.8, 129.3, 127.9, 119.4, 117.8, 111.4 (Ar-C), 50.9 (NCH<sub>2</sub>), 45.3 (CH), 44.9 (OCH<sub>2</sub>). HRMS (ESI) *m/z*: [M+Na]<sup>+</sup> Calcd for C<sub>9</sub>H<sub>10</sub>ClNONa 206.0349; Found 206.0330.

**2-bromo-*N*-(oxiran-2-ylmethyl)aniline (1k)** <sup>1</sup>H NMR (400 MHz, CDCl<sub>3</sub>) δ 7.37 – 7.30 (m, 1H, Ar-H), 7.13 – 7.04 (m, 1H, Ar-H), 6.65 – 6.58 (m, 1H, Ar-H), 6.54 – 6.46 (m, 1H, Ar-H), 4.44 (s, 1H, NH), 3.52 – 3.41 (m, 1H, NCHH), 3.25 – 3.17 (m,

1H, NCHH), 3.15 – 3.09 (m, 1H, CH), 2.73 (dd,  $J = 4.9, 4.0$  Hz, 1H, OCHH), 2.60 (dd,  $J = 4.9, 2.6$  Hz, 1H, OCHH).  $^{13}\text{C}$  NMR (101 MHz,  $\text{CDCl}_3$ )  $\delta$  144.7, 132.6, 128.6, 118.4, 111.5, 110.0 (Ar-C), 50.9 (NCH<sub>2</sub>), 45.3 (CH), 45.0 (OCH<sub>2</sub>). HRMS (ESI)  $m/z$ :  $[\text{M}+\text{Na}]^+$  Calcd for  $\text{C}_9\text{H}_{10}\text{BrNONa}$  249.9843; Found 249.9836.

**2-methyl-*N*-(oxiran-2-ylmethyl)aniline (11)**<sup>1</sup>  $^1\text{H}$  NMR (400 MHz,  $\text{CDCl}_3$ )  $\delta$  7.21 – 7.07 (m, 2H, Ar-H), 6.77 – 6.65 (m, 2H, Ar-H), 3.77 (s, 1H, NH), 3.61 (d,  $J = 11.8$  Hz, 1H, NCHH), 3.34 – 3.25 (m, 2H, NCHH+CH), 2.86 (dd,  $J = 4.3, 2.2$  Hz, 1H, OCHH), 2.73 (dd,  $J = 5.1, 2.2$  Hz, 1H, OCHH), 2.19 (s, 3H, CH<sub>3</sub>).

**2-ethyl-*N*-(oxiran-2-ylmethyl)aniline (1m)**  $^1\text{H}$  NMR (400 MHz,  $\text{CDCl}_3$ )  $\delta$  7.21 – 7.06 (m, 2H, Ar-H), 6.84 – 6.66 (m, 2H, Ar-H), 3.85 (s, 1H, NH), 3.61 (d,  $J = 13.3$  Hz, 1H, NCHH), 3.38 – 3.19 (m, 2H, NCHH+CH), 2.85 (dd,  $J = 4.4, 2.4$  Hz, 1H, OCHH), 2.72 (dd,  $J = 5.0, 2.4$  Hz, 1H, OCHH), 2.52 (q,  $J = 7.5$  Hz, 2H, CH<sub>2</sub>), 1.27 (t,  $J = 7.5$  Hz, 3H, CH<sub>3</sub>).  $^{13}\text{C}$  NMR (101 MHz,  $\text{CDCl}_3$ )  $\delta$  145.3, 128.2, 128.1, 127.1, 117.8, 110.3 (Ar-C), 51.1 (NCH<sub>2</sub>), 45.5 (CH), 45.0 (OCH<sub>2</sub>), 23.9 (CH<sub>2</sub>), 13.0 (CH<sub>3</sub>). HRMS (EI)  $m/z$ :  $[\text{M}]$  Calcd for  $\text{C}_{11}\text{H}_{15}\text{NO}$  177.1154; Found 177.1152.

**2-isopropyl-*N*-(oxiran-2-ylmethyl)aniline (1n)**  $^1\text{H}$  NMR (400 MHz,  $\text{CDCl}_3$ )  $\delta$  7.21 – 7.09 (m, 2H, Ar-H), 6.82 – 6.75 (m, 1H, Ar-H), 6.71 – 6.66 (m, 1H, Ar-H), 3.93 (s, 1H, NH), 3.68 – 3.54 (m, 1H, NCHH), 3.40 – 3.22 (m, 2H, NCHH+CH), 2.95 – 2.83 (m, 2H, OCH<sub>2</sub>), 2.73 (sep, 1H, CH(CH<sub>3</sub>)<sub>2</sub>), 1.27 (dd,  $J = 6.8, 4.0$  Hz, 6H, CH<sub>3</sub>).  $^{13}\text{C}$  NMR (101 MHz,  $\text{CDCl}_3$ )  $\delta$  144.6, 132.8, 126.8, 125.3, 118.0, 110.8 (Ar-C), 51.1 (NCH<sub>2</sub>), 45.6 (CH), 45.2 (OCH<sub>2</sub>), 27.3 (CH(CH<sub>3</sub>)<sub>2</sub>), 22.4 (CH<sub>3</sub>). HRMS (ESI)  $m/z$ :  $[\text{M}+\text{H}]^+$  Calcd for  $\text{C}_{12}\text{H}_{18}\text{NO}$  192.1388; Found 192.1388.

**2-methoxy-*N*-(oxiran-2-ylmethyl)aniline (1o)**  $^1\text{H}$  NMR (400 MHz,  $\text{CDCl}_3$ )  $\delta$  6.95 – 6.86 (m, 1H, Ar-H), 6.83 – 6.77 (m, 1H, Ar-H), 6.71 – 6.64 (m, 2H, Ar-H), 4.48 (s, 1H, NH), 3.86 (s, 3H, CH<sub>3</sub>), 3.59 – 3.47 (m, 1H, NCHH), 3.33 – 3.21 (m, 2H, NCHH+CH), 2.83 (dd,  $J = 4.4, 2.5$  Hz, 1H, OCHH), 2.70 (dd,  $J = 5.0, 2.5$  Hz, 1H, OCHH).  $^{13}\text{C}$  NMR (101 MHz,  $\text{CDCl}_3$ )  $\delta$  147.0, 137.9, 121.3, 117.1, 110.0, 109.6 (Ar-C), 55.5 (NCH<sub>2</sub>), 51.1 (OCH<sub>3</sub>), 45.5 (CH), 45.1 (OCH<sub>2</sub>). HRMS (ESI)  $m/z$ :  $[\text{M}+\text{H}]^+$  Calcd for  $\text{C}_{10}\text{H}_{14}\text{NO}$  180.1025; Found 180.1024.

**3-chloro-*N*-(oxiran-2-ylmethyl)aniline (1p)**<sup>1</sup> <sup>1</sup>H NMR (400 MHz, CDCl<sub>3</sub>) δ 7.12 – 7.04 (m, 1H, Ar-H), 6.72 – 6.67 (m, 1H, Ar-H), 6.63-6.59 (m, 1H, Ar-H), 6.53 – 6.47 (m, 1H, Ar-H), 3.98 (s, 1H, NH), 3.58-3.46 (m, 1H, NCHH), 3.24 – 3.15 (m, 2H, NCHH+CH), 2.82 (dd, *J* = 4.9, 3.8 Hz, 1H, OCHH), 2.67 (dd, *J* = 4.8, 2.4 Hz, 1H, OCHH).

**3-methyl-*N*-(oxiran-2-ylmethyl)aniline (1q)**<sup>1</sup> <sup>1</sup>H NMR (400 MHz, CDCl<sub>3</sub>) δ 7.15 – 7.05 (m, 1H, Ar-H), 6.63 – 6.54 (m, 1H, Ar-H), 6.51 – 6.45 (m, 2H, Ar-H), 3.85 (s, 1H, NH), 3.59 – 3.47 (m, 1H, NCHH), 3.30 – 3.19 (m, 2H, NCHH+CH), 2.83 (dd, *J* = 5.7, 3.0 Hz, 1H, OCHH), 2.71 (dd, *J* = 5.0, 2.2 Hz, 1H, OCHH), 2.31 (s, 3H, CH<sub>3</sub>).

**2,6-difluoro-*N*-(oxiran-2-ylmethyl)aniline (1r)** <sup>1</sup>H NMR (400 MHz, CDCl<sub>3</sub>) δ 6.86 – 6.75 (m, 2H, Ar-H), 6.71 – 6.60 (m, 1H, Ar-H), 3.82 (s, 1H, NH), 3.75 – 3.67 (m, 1H, NCHH), 3.43 – 3.28 (m, 1H, NCHH), 3.23 – 3.15 (m, 1H, CH), 2.80 (dd, *J* = 4.4, 2.7 Hz, 1H, OCHH), 2.68 (dd, *J* = 4.9, 2.7 Hz, 1H, OCHH). <sup>13</sup>C NMR (101 MHz, CDCl<sub>3</sub>) δ 153.4 (dd, *J* = 240.9, 7.5 Hz), 125.5, 117.8 (t, *J* = 9.5 Hz), 112.1 – 110.4 (m) (Ar-C), 51.4 (NCH<sub>2</sub>), 47.6 (t, *J* = 4.1 Hz, CH), 45.1 (OCH<sub>2</sub>). <sup>19</sup>F NMR (376 MHz, CDCl<sub>3</sub>) δ -128.9. HRMS (ESI) *m/z*: [M+Na]<sup>+</sup> Calcd for C<sub>9</sub>H<sub>9</sub>F<sub>2</sub>NONa 208.0550; Found 208.0546.

**2,6-dichloro-*N*-(oxiran-2-ylmethyl)aniline (1s)** <sup>1</sup>H NMR (400 MHz, CDCl<sub>3</sub>) δ 7.25-7.21 (m, 2H, Ar-H), 6.82-6.77 (m, 1H, Ar-H), 4.20 (s, 1H, NH), 3.69 (dd, *J* = 14.0, 5.6 Hz, 1H, NCHH), 3.35 (dd, *J* = 14.1, 5.6 Hz, 1H, NCHH), 3.20 – 3.10 (m, 1H, CH), 2.80 (dd, *J* = 4.4, 2.7 Hz, 1H, OCHH), 2.70 (dd, *J* = 4.9, 2.7 Hz, 1H, OCHH). <sup>13</sup>C NMR (101 MHz, CDCl<sub>3</sub>) δ 142.2, 128.9, 126.6, 122.3 (Ar-C), 51.5 (NCH<sub>2</sub>), 48.8 (CH), 45.5 (OCH<sub>2</sub>). HRMS (ESI) *m/z*: [M+Na]<sup>+</sup> Calcd for C<sub>9</sub>H<sub>9</sub>Cl<sub>2</sub>NONa 239.9959; Found 239.9952.

**2,6-dibromo-*N*-(oxiran-2-ylmethyl)aniline (1t)** <sup>1</sup>H NMR (400 MHz, CDCl<sub>3</sub>) δ 7.50 – 7.39 (m, 2H, Ar-H), 6.73 – 6.66 (m, 1H, Ar-H), 4.11 (s, 1H, NH), 3.66 – 3.56 (m, 1H, NCHH), 3.34 – 3.25 (m, 1H, NCHH), 3.24 – 3.15 (m, 1H, CH), 2.81 (dd, *J* = 4.4, 2.6 Hz, 1H, OCHH), 2.72 (dd, *J* = 4.9, 2.6 Hz, 1H, OCHH). <sup>13</sup>C NMR (101 MHz, CDCl<sub>3</sub>) δ 144.5, 132.9, 124.2, 117.6 (Ar-C), 51.7 (NCH<sub>2</sub>), 49.6 (CH), 45.6 (OCH<sub>2</sub>).

HRMS (ESI)  $m/z$ :  $[M+Na]^+$  Calcd for  $C_9H_9Br_2NONa$  327.8949; Found 327.8961.

**2,6-dimethyl-*N*-(oxiran-2-ylmethyl)aniline (1u)**  $^1H$  NMR (400 MHz,  $CDCl_3$ )  $\delta$  7.08 – 7.00 (m, 2H, Ar-H), 6.94 – 6.83 (m, 1H, Ar-H), 3.43 – 3.36 (m, 1H, NCHH), 3.34 (s, 1H, NH), 3.20 – 3.13 (m, 1H, CH), 3.04 – 2.95 (m, 1H, NCHH), 2.84 (dd,  $J = 4.5, 2.6$  Hz, 1H, OCHH), 2.73 (dd,  $J = 5.0, 2.6$  Hz, 1H, OCHH), 2.35 (d,  $J = 2.7$  Hz, 6H,  $CH_3$ ).  $^{13}C$  NMR (101 MHz,  $CDCl_3$ )  $\delta$  145.3, 129.9, 128.9, 122.4 (Ar-C), 51.7 (NCH<sub>2</sub>), 50.0 (CH), 45.7 (OCH<sub>2</sub>), 18.4 ( $CH_3$ ). HRMS (ESI)  $m/z$ :  $[M+Na]^+$  Calcd for  $C_{11}H_{15}NONa$  208.0550; Found 208.0541.

**2,6-diisopropyl-*N*-(oxiran-2-ylmethyl)aniline (1v)**  $^1H$  NMR (400 MHz,  $CDCl_3$ )  $\delta$  7.14 – 7.05 (m, 3H, Ar-H), 3.36 – 3.18 (m, 5H, NH+CH+NCHH+CH( $CH_3$ )<sub>2</sub>), 2.91 (dd,  $J = 12.8, 5.6$  Hz, 1H, NCHH), 2.85 (dd,  $J = 5.0, 3.8$  Hz, 1H, OCHH), 2.77 (dd,  $J = 5.0, 2.5$  Hz, 1H, OCHH), 1.25 (dd,  $J = 6.9, 1.2$  Hz, 12H,  $CH_3$ ).  $^{13}C$  NMR (101 MHz,  $CDCl_3$ )  $\delta$  142.8, 142.3, 124.2, 123.6 (Ar-C), 53.1 (NCH<sub>2</sub>), 51.6 (CH), 45.5 (OCH<sub>2</sub>), 27.6 (CH( $CH_3$ )<sub>2</sub>), 24.3 ( $CH_3$ ). HRMS (ESI)  $m/z$ :  $[M+H]^+$  Calcd for  $C_{15}H_{24}NO$  234.1858; Found 234.1855.

***N*-(oxiran-2-ylmethyl)-3,5-bis(trifluoromethyl)aniline (1w)**  $^1H$  NMR (400 MHz,  $CDCl_3$ )  $\delta$  7.20 (s, 1H, Ar-H), 7.00 (s, 2H, Ar-H), 4.19 – 4.02 (m, 1H, CH), 3.76 – 3.61 (m, 2H, NCH<sub>2</sub>), 3.44 (dd,  $J = 13.0, 4.1$  Hz, 1H, OCHH), 3.28 (dd,  $J = 13.0, 7.2$  Hz, 1H, OCHH), 2.50 (s, 1H, NH).  $^{13}C$  NMR (101 MHz,  $CDCl_3$ )  $\delta$  147.5 (Ar-C), 131.5 (q,  $J = 32.8$  Hz) (Ar-C), 122.5 (q,  $J = 272.7$  Hz) ( $CF_3$ ), 111.3 (d,  $J = 4.0$  Hz) (Ar-C), 110.2 – 109.7 (m) (Ar-C), 68.7 (NCH<sub>2</sub>), 46.4 (CH), 45.4 (OCH<sub>2</sub>).  $^{19}F$  NMR (376 MHz,  $CDCl_3$ )  $\delta$  -63.3. HRMS (EI)  $m/z$ :  $[M]$  Calcd for  $C_{11}H_9F_6NO$  285.0588; Found 285.0594.

**2,3,4,5,6-pentafluoro-*N*-(oxiran-2-ylmethyl)aniline (1x)**  $^1H$  NMR (400 MHz,  $CDCl_3$ )  $\delta$  3.85 – 3.69 (m, 2H, NH, NCHH), 3.38 – 3.28 (m, 1H, CH), 3.23-3.15 (m, 1H, NCHH), 2.84 (dd,  $J = 4.7, 4.0$  Hz, 1H, OCHH), 2.69 (dd,  $J = 4.7, 2.6$  Hz, 1H, OCHH).  $^{13}C$  NMR (101 MHz,  $CDCl_3$ )  $\delta$  140.7 – 138.3 (m), 138.1 – 135.5 (m), 135.1 (t,  $J = 13.9$  Hz), 132.7 (d,  $J = 4.2$  Hz), 123.6 (t,  $J = 11.9$  Hz) (Ar-C), 51.3 (NCH<sub>2</sub>), 47.4 (t,  $J = 4.0$  Hz, CH), 45.2 (OCH<sub>2</sub>).  $^{19}F$  NMR (376 MHz,  $CDCl_3$ )  $\delta$  -159.4 (dd,  $J =$



17.0, 5.9 Hz), -163.7 – -165.6 (m), -170.4 – -172.5 (m). HRMS (EI)  $m/z$ : [M] Calcd for C<sub>9</sub>H<sub>6</sub>F<sub>5</sub>NO 239.0370; Found 239.0372.

**(R)-4-chloro-N-(oxiran-2-ylmethyl) aniline (1y)**<sup>1</sup> <sup>1</sup>H NMR (400 MHz, CDCl<sub>3</sub>)  $\delta$  7.20 – 6.97 (m, 2H, Ar-H), 6.60 – 6.43 (m, 2H, Ar-H), 3.90 (s, 1H, NH), 3.48 (dd,  $J$  = 13.3, 2.1 Hz, 1H, NCHH), 3.24 – 3.04 (m, 2H, CH, NCHH), 2.79 (dd,  $J$  = 4.8, 3.8 Hz, 1H, OCHH), 2.65 (dd,  $J$  = 4.9, 2.4 Hz, 1H, OCHH).

**3-fluoro-4-morpholino-N-(oxiran-2-ylmethyl)aniline (1z)**<sup>1</sup> <sup>1</sup>H NMR (400 MHz, CDCl<sub>3</sub>)  $\delta$  6.85 – 6.70 (m, 1H, Ar-H), 6.37 – 6.28 (m, 2H, Ar-H), 3.91 (s, 1H, NH), 3.79 (t,  $J$  = 4.6 Hz, 4H, OCH<sub>2</sub>CH<sub>2</sub>N), 3.43 (d,  $J$  = 13.4 Hz, 1H, NCHH), 3.18 – 3.03 (m, 2H, CH, NCHH), 2.91 (dd,  $J$  = 5.8, 3.5 Hz, 4H, OCH<sub>2</sub>CH<sub>2</sub>N), 2.76 (dd,  $J$  = 4.3, 2.5 Hz, 1H, OCHH), 2.62 (dd,  $J$  = 5.0, 2.5 Hz, 1H, OCHH).

**Scheme S2** Preparation of chiral epoxy amine (*R*)-**1y** and (*S*)-**1z**.

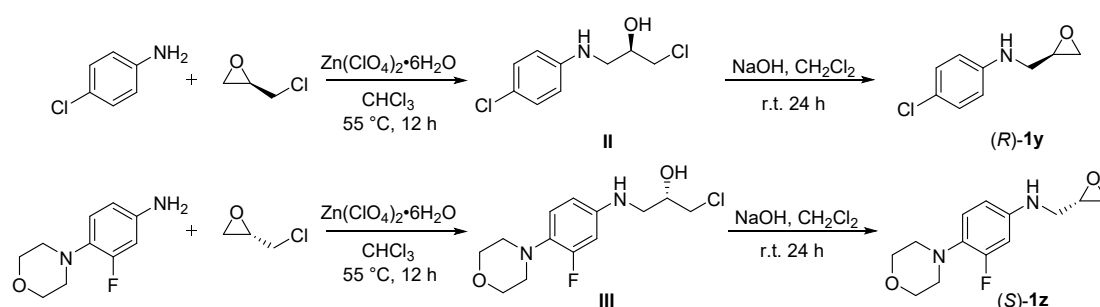

Following reported procedures,<sup>1</sup> 4-chloroaniline (20.0 mmol), (*R*)-epichlorohydrin (22.0 mmol) and Zn(ClO<sub>4</sub>)<sub>2</sub>·6H<sub>2</sub>O (0.4 mmol, 2 mol%) were dissolved in CHCl<sub>3</sub> (50 mL). The mixture was heated under reflux for 12 hours. After reaction, all volatiles were removed in vacuo, and the (*R*)- $\gamma$ -chloro- $\beta$ -hydroxyaniline **II** was isolated by column chromatography (eluent: petroleum ether: ethyl acetate, from 100: 0 to 80: 20). It was then dissolved in dichloromethane (100 mL), and a 0.3 M sodium hydroxide aqueous solution (100 mL) was added. After overnight reaction at room temperature, the organic layer was separated, washed with brine (3  $\times$  100 mL) and dried over Na<sub>2</sub>SO<sub>4</sub>. (*R*)-**1y** (2.06 g, 11.2 mmol, 56% yield) was obtained after removal of solvent.

(*S*)-Epoxy amine was synthesized following the same procedure from 3-fluoro-4-morpholinoaniline (20.0 mmol) and (*S*)-epichlorohydrin (22.0 mmol). (*S*)-**1z** was isolated in 2.62 g, 10.4 mmol, 52% yield.

### 3. Coupling reactions between epoxy amines and CO<sub>2</sub>.

**Table S1**  $pK_b$  value of various amines<sup>a</sup>

| Entry | base                                                                                | $pK_b$     |
|-------|-------------------------------------------------------------------------------------|------------|
| 1     | 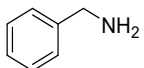   | 8.3        |
| 2     |    | 13.75      |
| 3     |   | (4.41)     |
| 4     |  | (3.6)      |
| 5     |  | 6.2 (3.25) |
| 6     |  | 7          |
| 7     |  | 1.1        |

<sup>a</sup>  $pK_b$  value of the conjugated acid in acetonitrile<sup>2,3</sup> or water<sup>4</sup> (in parenthesis).

**General procedure:** epoxy amine (0.5 mmol) and amine (5 mol%) were dissolved in DMF (0.5 mL), and the flask was connected with a CO<sub>2</sub> balloon. The mixture was heated at 60-80 °C for 20 h, during which period slight blackening was observed. After reaction, the mixture was analyzed by <sup>1</sup>H NMR (0.1 mmol of tetraethylsilane was added as the internal standard) to determine the NMR yield, and purified by flash chromatography (eluent: petroleum ether: ethyl acetate, from 60: 40 to 0: 100) to determine the isolated yield.

**Table S2** Condition optimization for the reaction of CO<sub>2</sub> and epoxy amine **1a**.<sup>a</sup>

| Entry | Catalyst loading (mol %) | Temp. (°C) | T (h) | Yield (%) | 2a:3a |
|-------|--------------------------|------------|-------|-----------|-------|
| 1     | 5                        | 60         | 20    | 99        | >99:1 |
| 2     | 5                        | 50         | 20    | 76        | >99:1 |
| 3     | 5                        | 60         | 19    | 89        | >99:1 |
| 4     | 5                        | 60         | 18    | 85        | >99:1 |
| 5     | 4                        | 60         | 20    | 90        | >99:1 |
| 6     | 3                        | 60         | 20    | 88        | >99:1 |
| 7     | 2                        | 60         | 24    | 99        | >99:1 |
| 8     | -                        | 60         | 20    | n.d.      | n.d.  |

<sup>a</sup>Reaction conditions: epoxy amine (0.5 mmol), DMF (0.5 mL) and CO<sub>2</sub> (1 bar). Yields and selectivity were determined by NMR spectroscopy with tetraethylsilane as an internal standard.

**Table S3** Solvent optimization for the reaction of CO<sub>2</sub> and epoxy amine **1a**.<sup>a</sup>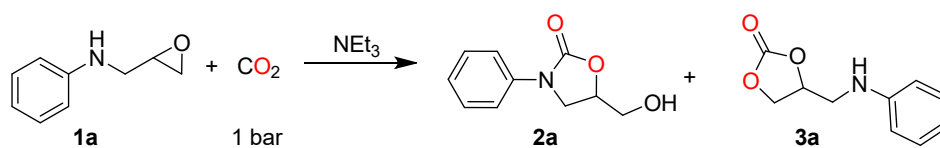

| Entry | Solvent                                     | Yield (%) | 2a:3a |
|-------|---------------------------------------------|-----------|-------|
| 1     | CH <sub>3</sub> CN                          | 72        | >99:1 |
| 2     | CH <sub>2</sub> Cl <sub>2</sub>             | 56        | >99:1 |
| 3     | EA                                          | 52        | 3:10  |
| 4     | C <sub>2</sub> H <sub>5</sub> OH            | 80        | 8:1   |
| 5     | Tol                                         | 26        | >99:1 |
| 6     | CH <sub>3</sub> COCH <sub>3</sub>           | 72        | >99:1 |
| 7     | PhCl                                        | 66        | >99:1 |
| 8     | THF                                         | 36        | >99:1 |
| 9     | DMF                                         | 99        | >99:1 |
| 10    | C <sub>2</sub> H <sub>5</sub> OH:DMF<br>9:1 | 82        | 40:1  |
| 11    | C <sub>2</sub> H <sub>5</sub> OH:DMF<br>4:1 | 88        | 11:1  |
| 12    | C <sub>2</sub> H <sub>5</sub> OH:DMF<br>1:1 | 94        | 47:3  |

<sup>a</sup>Reaction conditions: epoxy amine (0.5 mmol), NEt<sub>3</sub> (5 mol%), solvent (0.5 mL) and CO<sub>2</sub> (1 bar), temperature (60 °C), 20 h reaction. Yields and selectivity were determined by NMR spectroscopy with tetraethylsilane as an internal standard.

**Table S4** Amine-catalyzed reaction of 2,6-dimethyl substituted amine epoxy with CO<sub>2</sub>.<sup>a</sup>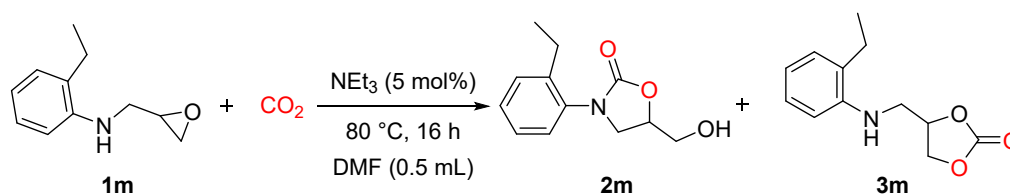

| Entry | Cat. (5 mol%) | Conversion (%) | Yield (%) of <b>2m</b> | <b>2m:3m</b> |
|-------|---------------|----------------|------------------------|--------------|
| 1     |               | 96             | 96                     | >99:1        |
| 2     |               | 99             | 64                     | 2:1          |

<sup>a</sup>Reaction conditions: **1m** (0.5 mmol), NEt<sub>3</sub> (5 mol%), DMF (0.5 mL), and CO<sub>2</sub> (1 bar) at 80 °C for 16 h. Yields, conversions and selectivity were determined by NMR spectroscopy with mesitylene as an internal standard.

**Table S5** Amine-catalyzed reaction of 2,6-diisopropyl substituted amine epoxy with CO<sub>2</sub>.<sup>a</sup>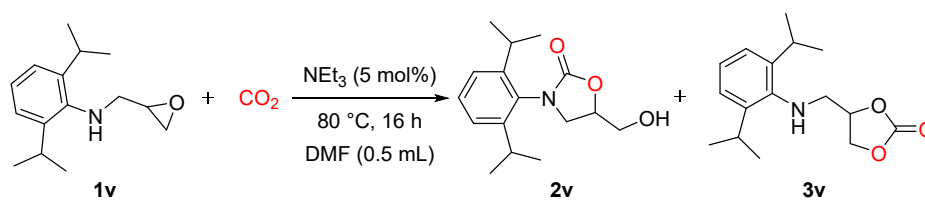

| Entry | Cat. (5 mol%) | Conversion (%) | Yield (%) of <b>2v</b> | <b>2v:3v</b> |
|-------|---------------|----------------|------------------------|--------------|
| 1     |               | 80             | 80                     | >99:1        |
| 2     |               | 82             | 82                     | >99:1        |
| 3     |               | 94             | 94                     | >99:1        |
| 4     |               | 76             | 76                     | >99:1        |
| 5     |               | 90             | 70                     | 4:1          |

<sup>a</sup>Reaction conditions: **1v** (0.5 mmol), NEt<sub>3</sub> (5 mol%), DMF (0.5 mL), and CO<sub>2</sub> (1 bar) at 80 °C for 16 h. Yields, conversions and selectivity were determined by NMR spectroscopy with tetraethylsilane as an internal standard.

**Characterization data:****5-(hydroxymethyl)-3-phenyloxazolidin-2-one (**2a**)<sup>1</sup>**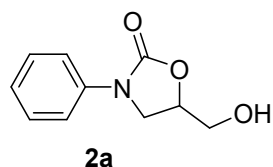

White solid, isolated in 96.0 mg, 0.5 mmol, 99% yield. <sup>1</sup>H NMR (400 MHz, CDCl<sub>3</sub>) δ 7.56 – 7.51 (m, 2H, Ar-H), 7.41 – 7.32 (m, 2H, Ar-H), 7.17 – 7.10 (m, 1H, Ar-H), 4.77 – 4.68 (m, 1H, CH), 4.09 – 3.92 (m, 3H, NCH<sub>2</sub>+CHHOH), 3.80 – 3.76 (m, 1H, CHHOH), 2.65 (br-s, *J* = 6.2 Hz, 1H, OH).

**(4-fluorophenyl)-5-(hydroxymethyl)oxazolidin-2-one (**2b**)<sup>1</sup>**

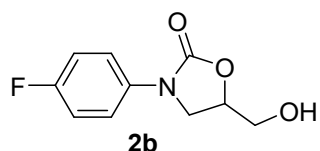

White solid, isolated in 100.0 mg, 0.47 mmol, 95% yield.  $^1\text{H}$  NMR (400 MHz,  $\text{CDCl}_3$ )  $\delta$  7.58 – 7.42 (m, 2H, Ar-H), 7.11 – 7.02 (m, 2H, Ar-H), 4.79 – 4.65 (m, 1H, CH), 4.08 – 3.89 (m, 3H,  $\text{NCH}_2+\text{CHHOH}$ ), 3.75 (dd,  $J = 12.6, 3.9$  Hz, 1H,  $\text{CHHOH}$ ), 2.59 (br-s, 1H, OH).

**(4-chlorophenyl)-5-(hydroxymethyl)oxazolidin-2-one (2c)<sup>1</sup>**

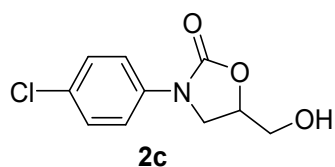

Pale yellow solid, isolated in 100.1 mg, 0.44 mmol, 88% yield.  $^1\text{H}$  NMR (400 MHz,  $\text{CDCl}_3$ )  $\delta$  7.52 – 7.44 (m, 2H, Ar-H), 7.35 – 7.29 (m, 2H, Ar-H), 4.73 (tt,  $J = 7.3, 3.5$  Hz, 1H, CH), 4.06 – 3.90 (m, 3H,  $\text{NCH}_2+\text{CHHOH}$ ), 3.74 (dd,  $J = 12.7, 3.8$  Hz, 1H,  $\text{CHHOH}$ ), 2.74 (br-s, 1H, OH).

**(4-bromophenyl)-5-(hydroxymethyl)oxazolidin-2-one (2d)<sup>1</sup>**

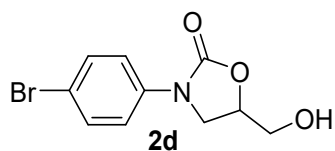

Yellow solid, isolated in 114.3 mg, 0.42 mmol, 81%.  $^1\text{H}$  NMR (400 MHz,  $\text{CDCl}_3$ )  $\delta$  7.50 – 7.37 (m, 4H, Ar-H), 4.78 – 4.68 (m, 1H, CH), 4.06 – 3.92 (m, 3H,  $\text{NCH}_2+\text{CHHOH}$ ), 3.73 (dd,  $J = 12.7, 3.8$  Hz, 1H,  $\text{CHHOH}$ ), 2.74 (br-s, 1H, OH).

**5-(hydroxymethyl)-3-(4-nitrophenyl)oxazolidin-2-one (2e)**

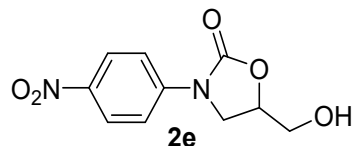

Yellow solid, isolated in 120.4 mg, 0.43 mmol, 86% yield.  $^1\text{H}$  NMR (400 MHz,  $\text{DMSO}-d_6$ )  $\delta$  8.33 – 8.22 (m, 2H, Ar-H), 7.87 – 7.76 (m, 2H, Ar-H), 5.25 (t,  $J = 5.6$  Hz, 1H, OH), 4.83 – 4.70 (m, 1H, CH), 4.18 (dd,  $J = 9.1, 6.0$  Hz, 1H,  $\text{NCHH}$ ), 3.92 (dd,  $J = 9.0, 6.0$  Hz, 1H,  $\text{NCHH}$ ), 3.76-3.64 (m, 1H,  $\text{CHHOH}$ ), 3.64-3.52 (m, 1H,

CHHOH).  $^{13}\text{C}$  NMR (101 MHz, DMSO- $d_6$ )  $\delta$  154.2 (C=O), 144.4, 142.1, 124.9, 117.4 (Ar-C), 73.6 (CH), 61.5 (NCH<sub>2</sub>), 46.0 (CH<sub>2</sub>OH). HRMS (ESI)  $m/z$ : [M+Na]<sup>+</sup> Calcd for C<sub>10</sub>H<sub>10</sub>N<sub>2</sub>O<sub>5</sub>Na 261.0487; Found 261.0499.

**4-(((4-(trifluoromethyl)phenyl)amino)methyl)-1,3-dioxolan-2-one (3f)**

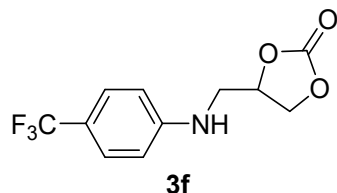

White solid, isolated in 99.3 mg, 0.38 mmol, 76%.  $^1\text{H}$  NMR (400 MHz, CDCl<sub>3</sub>)  $\delta$  7.49 – 7.33 (m, 2H, Ar-H), 6.72 – 6.57 (m, 2H, Ar-H), 4.99 – 4.83 (m, 1H, CH), 4.60 – 4.46 (m, 2H, NCH<sub>2</sub>), 4.26 (dd,  $J$  = 8.7, 6.7 Hz, 1H, NH), 3.62 – 3.38 (m, 2H, CH<sub>2</sub>OH).  $^{13}\text{C}$  NMR (101 MHz, CDCl<sub>3</sub>)  $\delta$  154.9 (C=O), 149.5 (Ar-C), 126.9 (q,  $J$  = 4.0 Hz) (Ar-C), 128.7 – 123.3 (t,  $J$  = 271.7 Hz) (CF<sub>3</sub>), 120.4 (q,  $J$  = 30.3 Hz) (Ar-C), 112.4 (Ar-C), 75.4 (CH), 67.1 (NCH<sub>2</sub>), 45.3 (CH<sub>2</sub>OH).  $^{19}\text{F}$  NMR (376 MHz, CDCl<sub>3</sub>)  $\delta$  -118.25. HRMS (ESI)  $m/z$ : [M+Na]<sup>+</sup> Calcd for C<sub>11</sub>H<sub>10</sub>F<sub>3</sub>NO<sub>3</sub>Na 284.0510; Found 284.0505.

**5-(hydroxymethyl)-3-(p-tolyl)oxazolidin-2-one (2g)<sup>1</sup>**

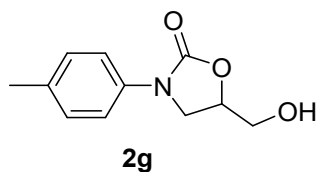

White solid, isolated in 102.4 mg, 0.49 mmol, 96%.  $^1\text{H}$  NMR (400 MHz, CDCl<sub>3</sub>)  $\delta$  7.46 – 7.36 (m, 2H, Ar-H), 7.22 – 7.12 (m, 2H, Ar-H), 4.80 – 4.61 (m, 1H, CH), 4.05 – 3.89 (m, 3H, NCH<sub>2</sub>+CHHOH), 3.75 (dd,  $J$  = 12.6, 4.2 Hz, 1H, CHHOH), 2.33 (s, 3H, CH<sub>3</sub>), 1.93 (br-s, 1H, OH).

**4-(4-(tert-butyl)phenyl)-5-(hydroxymethyl)oxazolidin-2-one (2h)**

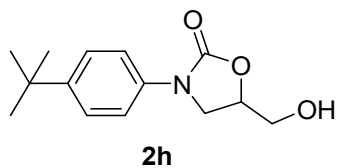

Pale yellow solid, isolated in 114.6 mg, 0.46 mmol, 92%.  $^1\text{H}$  NMR (400 MHz, CDCl<sub>3</sub>)  $\delta$  7.50 – 7.44 (m, 2H, Ar-H), 7.42 – 7.34 (m, 2H, Ar-H), 4.79 – 4.65 (m, 1H, CH),

4.10 – 3.89 (m, 3H, NCH<sub>2</sub>+CHHOH), 3.75 (dd, *J* = 12.6, 4.2 Hz, 1H, CHHOH), 1.31 (s, 9H, CH<sub>3</sub>). <sup>13</sup>C NMR (101 MHz, CDCl<sub>3</sub>) δ 155.2 (C=O), 147.3, 135.6, 126.0, 118.3 (Ar-C), 73.1 (CH), 62.9 (NCH<sub>2</sub>), 46.6 (CH<sub>2</sub>OH), 34.5 (C(CH<sub>3</sub>)<sub>3</sub>), 31.4 (CH<sub>3</sub>). HRMS (ESI) *m/z*: [M+Na]<sup>+</sup> Calcd for C<sub>14</sub>H<sub>19</sub>NO<sub>3</sub>Na 272.1263; Found 272.1261.

### 3-(2-fluorophenyl)-5-(hydroxymethyl)oxazolidin-2-one (2i)

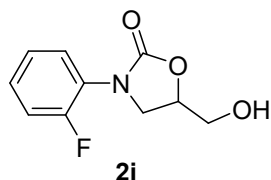

White solid, isolated in 100.4 mg, 0.48 mmol, 95%. <sup>1</sup>H NMR (400 MHz, CDCl<sub>3</sub>) δ 7.57 – 7.48 (m, 1H, Ar-H), 7.29 – 7.22 (m, 1H, Ar-H), 7.20 – 7.10 (m, 2H, Ar-H), 4.84 – 4.71 (m, 1H, CH), 4.07 (t, *J* = 8.8 Hz, 1H, NCHH), 4.00 – 3.93 (m, 2H, NCHH+ CHHOH), 3.76 (dd, *J* = 12.6, 4.3 Hz, 1H, CHHOH), 2.65 (br-s, 1H, OH). <sup>13</sup>C NMR (101 MHz, CDCl<sub>3</sub>) δ 158.3 (C=O), 156.0 (d, *J* = 44.3 Hz), 128.5 (d, *J* = 7.8 Hz), 127.4 (d, *J* = 1.4 Hz), 125.2 (d, *J* = 11.0 Hz), 124.8 (d, *J* = 3.7 Hz), 116.8 (d, *J* = 20.0 Hz) (Ar-C), 74.3 (CH), 63.0 (NCH<sub>2</sub>), 48.2 (CH<sub>2</sub>OH). <sup>19</sup>F NMR (376 MHz, CDCl<sub>3</sub>) δ -120.71. HRMS (ESI) *m/z*: [M+Na]<sup>+</sup> Calcd for C<sub>10</sub>H<sub>10</sub>FNO<sub>3</sub>Na 234.0543; Found 234.0558.

### 3-(2-chlorophenyl)-5-(hydroxymethyl)oxazolidin-2-one (2j)

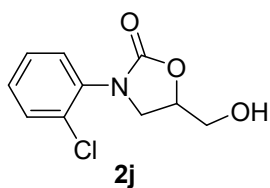

White solid, isolated in 103.5 mg, 0.46 mmol, 91%. <sup>1</sup>H NMR (400 MHz, CDCl<sub>3</sub>) δ 7.46 – 7.40 (m, 1H, Ar-H), 7.39 – 7.34 (m, 1H, Ar-H), 7.33 – 7.23 (m, 2H, Ar-H), 4.82 – 4.70 (m, 1H, CH), 3.98 (dd, *J* = 8.7, 6.4 Hz, 1H, NCHH), 3.89 (dd, *J* = 12.6, 3.4 Hz, 1H, CHHOH), 3.84 (dd, *J* = 8.5, 6.4 Hz, 1H, NCHH), 3.71 (dd, *J* = 12.6, 4.4 Hz, 1H, CHHOH), 3.27 (br-s, 1H, OH). <sup>13</sup>C NMR (101 MHz, CDCl<sub>3</sub>) δ 156.8 (C=O), 134.7, 132.5, 130.6, 129.7, 129.6, 128.1 (Ar-C), 74.6 (CH), 62.9 (NCH<sub>2</sub>), 48.3 (CH<sub>2</sub>OH). HRMS (ESI) *m/z*: [M+Na]<sup>+</sup> Calcd for C<sub>10</sub>H<sub>10</sub>ClNO<sub>3</sub>Na 250.0247; Found 250.0260.



### 3-(2-bromophenyl)-5-(hydroxymethyl)oxazolidin-2-one (2k)

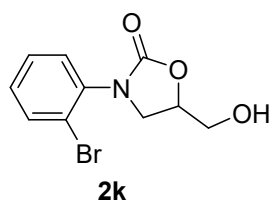

White solid, isolated in 115.6 mg, 0.43 mmol, 85%.  $^1\text{H}$  NMR (400 MHz,  $\text{CDCl}_3$ )  $\delta$  7.61 – 7.53 (m, 1H, Ar-H), 7.36 – 7.26 (m, 2H, Ar-H), 7.22 – 7.11 (m, 1H, Ar-H), 4.78 – 4.66 (m, 1H, CH), 3.95 (t,  $J = 8.7$  Hz, 1H, NCHH), 3.90 – 3.75 (m, 2H, NCHH+ CHHOH), 3.73-3.65 (m, 1H, CHHOH), 3.44 (br-s, 1H, OH).  $^{13}\text{C}$  NMR (101 MHz,  $\text{CDCl}_3$ )  $\delta$  156.8 (C=O), 136.2, 133.7, 130.0, 129.9, 128.8, 122.6 (Ar-C), 74.7 (CH), 62.8 (NCH<sub>2</sub>), 48.5 (CH<sub>2</sub>OH). HRMS (ESI)  $m/z$ :  $[\text{M}+\text{Na}]^+$  Calcd for  $\text{C}_{10}\text{H}_{10}\text{BrNO}_3\text{Na}$  293.9742; Found 293.9749.

### 5-(hydroxymethyl)-3-(o-tolyl)oxazolidin-2-one (2l)<sup>1</sup>

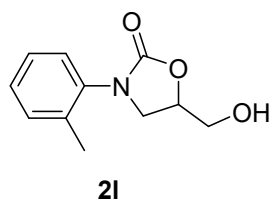

White solid, isolated in 100.0 mg, 0.46 mmol, 96%.  $^1\text{H}$  NMR (400 MHz,  $\text{CDCl}_3$ )  $\delta$  7.23 – 7.10 (m, 4H, Ar-H), 4.72 – 4.62 (m, 1H, CH), 3.90 – 3.76 (m, 3H, NCH<sub>2</sub>+CHHOH), 3.60 (dd,  $J = 12.7, 3.6$  Hz, 1H, CHHOH), 3.33 (br-s, 1H, OH), 2.23 (s, 3H, CH<sub>3</sub>).

### 3-(2-ethylphenyl)-5-(hydroxymethyl)oxazolidin-2-one (2m)

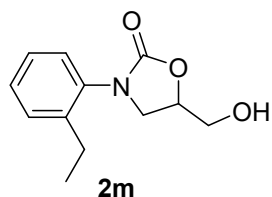

White solid, isolated in 110.6 mg, 0.43 mmol, 86%.  $^1\text{H}$  NMR (400 MHz,  $\text{CDCl}_3$ )  $\delta$  7.34 – 7.27 (m, 2H, Ar-H), 7.27 – 7.20 (m, 2H, Ar-H), 4.81 – 4.65 (m, 1H, CH), 3.99 – 3.81 (m, 3H, NCH<sub>2</sub>+CHHOH), 3.68 (dd,  $J = 12.6, 3.8$  Hz, 1H, CHHOH), 3.42 (br-s, 1H, OH), 2.65 (q,  $J = 7.6$  Hz, 2H, CH<sub>2</sub>), 1.23 (t,  $J = 7.6$  Hz, 3H, CH<sub>3</sub>).  $^{13}\text{C}$  NMR (101 MHz,  $\text{CDCl}_3$ )  $\delta$  157.1 (C=O), 142.2, 135.4, 129.4, 128.7, 127.3, 127.0 (Ar-C), 74.1

(CH), 62.8 (NCH<sub>2</sub>), 49.7 (CH<sub>2</sub>OH), 24.0 (CH<sub>2</sub>), 14.5 (CH<sub>3</sub>). HRMS (ESI) *m/z*: [M+Na]<sup>+</sup> Calcd for C<sub>12</sub>H<sub>15</sub>NO<sub>3</sub>Na 244.0950; Found 244.0944.

#### 4-(hydroxymethyl)-3-(2-isopropylphenyl)oxazolidin-2-one (2n)

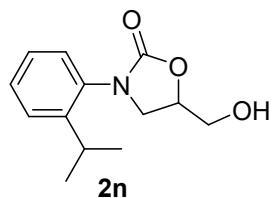

White solid, isolated in 117.6 mg, 0.5 mmol, 97%. <sup>1</sup>H NMR (400 MHz, CDCl<sub>3</sub>) δ 7.32 – 7.22 (m, 2H, Ar-H), 7.18 – 7.09 (m, 2H, Ar-H), 4.71 – 4.57 (m, 1H, CH), 3.87 – 3.48 (m, 5H, NCH<sub>2</sub>+CH<sub>2</sub>OH, OH), 3.04 (hept, *J* = 7.0 Hz, 1H, CH(CH<sub>3</sub>)<sub>2</sub>), 1.15 (t, *J* = 6.5 Hz, 6H, CH<sub>3</sub>). <sup>13</sup>C NMR (101 MHz, CDCl<sub>3</sub>) δ 157.6 (C=O), 147.2, 134.7, 129.0, 127.7, 127.0, 126.9 (Ar-C), 74.2 (CH), 62.8 (NCH<sub>2</sub>), 50.3 (CH<sub>2</sub>OH), 28.1 (CH(CH<sub>3</sub>)<sub>2</sub>), 23.9 (CH<sub>3</sub>). HRMS (ESI) *m/z*: [M+Na]<sup>+</sup> Calcd for C<sub>13</sub>H<sub>17</sub>NO<sub>3</sub>Na 258.1101; Found 258.1103.

#### 5-(hydroxymethyl)-3-(2-methoxyphenyl)oxazolidin-2-one (2o)

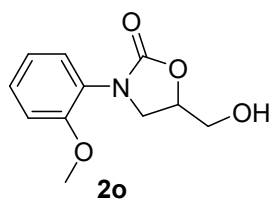

White solid, isolated in 101.5 mg, 0.45 mmol, 91%. <sup>1</sup>H NMR (400 MHz, CDCl<sub>3</sub>) δ 7.36 – 7.24 (m, 2H, Ar-H), 7.00 – 6.88 (m, 2H, Ar-H), 4.79 – 4.60 (m, 1H, CH), 3.97 (t, *J* = 8.8 Hz, 1H, NCHH), 3.87 – 3.70 (m, 6H, NCHH+CH<sub>2</sub>OH+CH<sub>3</sub>). <sup>13</sup>C NMR (101 MHz, CDCl<sub>3</sub>) δ 157.2 (C=O), 155.0, 129.1, 128.5, 125.8, 121.0, 112.1 (Ar-C), 74.4 (CH), 63.2 (NCH<sub>2</sub>), 55.7 (CH<sub>2</sub>OH), 48.4 (OCH<sub>3</sub>). HRMS (ESI) *m/z*: [M+Na]<sup>+</sup> Calcd for C<sub>11</sub>H<sub>13</sub>NO<sub>4</sub>Na 246.0742; Found 246.0738.

### 3-(3-chlorophenyl)-5-(hydroxymethyl)oxazolidin-2-one (2p)<sup>1</sup>

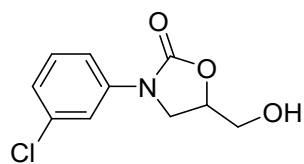

**2p**

Pale yellow solid, isolated in 110.0 mg, 0.48 mmol, 97%. <sup>1</sup>H NMR (400 MHz, CDCl<sub>3</sub>) δ 7.52 – 7.46 (m, 1H, Ar-H), 7.29 – 7.23 (m, 1H, Ar-H), 7.20 – 7.12 (m, 1H, Ar-H), 7.01 – 6.94 (m, 1H, Ar-H), 4.68 – 4.55 (m, 1H, CH), 3.93 – 3.79 (m, 3H, NCH<sub>2</sub>+CHHOH), 3.75 (s, 1H, CHHOH), 3.67 – 3.56 (m, 1H, OH).

### 5-(hydroxymethyl)-3-(m-tolyl)oxazolidin-2-one (2q)<sup>1</sup>

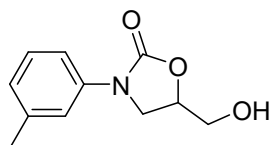

**2q**

Dark solid, isolated in 103.6 mg, 0.38 mmol, 75%. <sup>1</sup>H NMR (400 MHz, CDCl<sub>3</sub>) δ 7.39 – 7.35 (m, 1H, Ar-H), 7.32 – 7.27 (m, 1H, Ar-H), 7.26 – 7.21 (m, 1H, Ar-H), 6.97 – 6.92 (m, 1H, Ar-H), 4.79 – 4.63 (m, 1H, CH), 4.07 – 3.90 (m, 3H, NCH<sub>2</sub>+CHHOH), 3.73 (dd, *J* = 12.6, 4.2 Hz, 1H, CHHOH), 2.40 – 2.30 (m, 3H, CH<sub>3</sub>).

### 3-(2,6-difluorophenyl)-5-(hydroxymethyl)oxazolidin-2-one (2r)

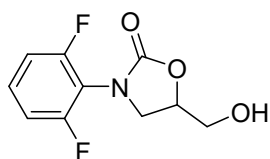

**2r**

White solid, isolated in 101.8 mg, 0.44 mmol, 89%. <sup>1</sup>H NMR (400 MHz, CDCl<sub>3</sub>) δ 7.31 – 7.21 (m, 1H, Ar-H), 7.01 – 6.89 (m, 2H, Ar-H), 4.86 – 4.72 (m, 1H, CH), 3.94 (t, *J* = 8.6 Hz, 1H, NCHH), 3.88 (dd, *J* = 12.5, 3.7 Hz, 1H, CHHOH), 3.81 (dd, *J* = 8.4, 6.5 Hz, 1H, NCHH), 3.73 (dd, *J* = 12.5, 4.5 Hz, 1H, CHHOH), 3.32 (br-s, 1H, OH). <sup>13</sup>C NMR (101 MHz, CDCl<sub>3</sub>) δ 159.3 (d, *J* = 253.3 Hz) (Ar-C), 156.0 (C=O), 129.7 (d, *J* = 10.1 Hz) (Ar-C), 112.4 (d, *J* = 3.6 Hz) (Ar-C), 112.2 (d, *J* = 3.5 Hz) (Ar-C), 75.1 (CH), 62.9 (NCH<sub>2</sub>), 47.8 (CH<sub>2</sub>OH). <sup>19</sup>F NMR (376 MHz, CDCl<sub>3</sub>) δ -117.35.

HRMS (ESI)  $m/z$ :  $[M+Na]^+$  Calcd for  $C_{10}H_9F_2NO_3Na$  252.0448; Found 252.0444.

**3-(2,6-dichlorophenyl)-5-(hydroxymethyl)oxazolidin-2-one (2s)**

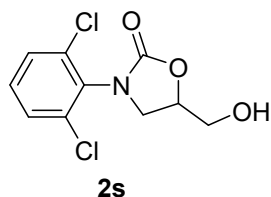

White solid, isolated in 115.4 mg, 0.44 mmol, 88%.  $^1H$  NMR (400 MHz,  $CDCl_3$ )  $\delta$  7.36 – 7.29 (m, 2H, Ar-H), 7.24 – 7.16 (m, 1H, Ar-H), 4.85 – 4.72 (m, 1H, CH), 3.94 – 3.83 (m, 2H,  $NCH_2$ ), 3.80 – 3.70 (m, 2H,  $CH_2OH$ ), 3.00 (br-s, 1H, OH).  $^{13}C$  NMR (101 MHz,  $CDCl_3$ )  $\delta$  155.6 (C=O), 135.7, 135.7, 132.0, 130.4, 128.9, 128.9 (Ar-C), 74.9 (CH), 63.1 ( $NCH_2$ ), 46.5 ( $CH_2OH$ ). HRMS (ESI)  $m/z$ :  $[M+Na]^+$  Calcd for  $C_{10}H_9Cl_2NO_3Na$  283.9857; Found 283.9862.

**3-(2,6-dibromophenyl)-5-(hydroxymethyl)oxazolidin-2-one (2t)**

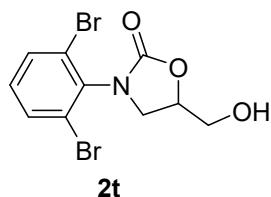

Pale yellow solid, isolated in 150.9 mg, 0.43 mmol, 86%.  $^1H$  NMR (400 MHz,  $CDCl_3$ )  $\delta$  7.68 – 7.50 (m, 2H, Ar-H), 7.17 – 7.01 (m, 1H, Ar-H), 4.92 – 4.74 (m, 1H, CH), 3.97 – 3.86 (m, 2H,  $NCH_2$ ), 3.85 – 3.76 (m, 2H,  $CH_2OH$ ), 3.74 – 3.58 (m, 1H, OH).  $^{13}C$  NMR (101 MHz,  $CDCl_3$ )  $\delta$  155.6 (C=O), 134.5, 132.8, 132.7, 131.4, 125.3, 125.3 (Ar-C), 75.1 (CH), 63.0 ( $NCH_2$ ), 46.5 ( $CH_2OH$ ). HRMS (ESI)  $m/z$ :  $[M+Na]^+$  Calcd for  $C_{10}H_9Br_2NO_3Na$  371.8847; Found 371.8842.

**3-(2,6-dimethylphenyl)-5-(hydroxymethyl)oxazolidin-2-one (2u)**

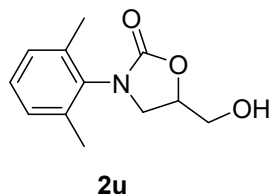

White solid, isolated in 90.2 mg, 0.41 mmol, 82%.  $^1H$  NMR (400 MHz,  $CDCl_3$ )  $\delta$  7.22 – 7.16 (m, 1H, Ar-H), 7.14 – 7.09 (m, 2H, Ar-H), 4.87 – 4.77 (m, 1H, CH), 4.02 (dd,  $J$  = 12.7, 3.0 Hz, 1H,  $NCHH$ ), 3.89 – 3.69 (m, 3H,  $NCHH+CH_2OH$ ), 2.96 (br-s, 1H, OH), 2.31 (s, 6H,  $CH_3$ ).  $^{13}C$  NMR (101 MHz,  $CDCl_3$ )  $\delta$  156.5 (C=O), 137.1,

136.7, 133.8, 128.9, 128.7, 128.7 (Ar-C), 74.1 (CH), 62.8 (NCH<sub>2</sub>), 47.1 (CH<sub>2</sub>OH), 17.8, 17.7 (CH<sub>3</sub>). HRMS (ESI) *m/z*: [M+Na]<sup>+</sup> Calcd for C<sub>12</sub>H<sub>15</sub>NO<sub>3</sub>Na 244.0950; Found 244.0961.

### 3-(2,6-diisopropylphenyl)-5-(hydroxymethyl)oxazolidin-2-one (2v)

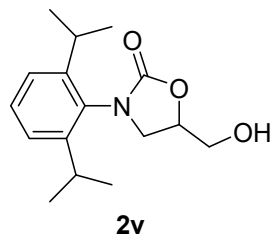

Dark solid, isolated in 120.6 mg, 0.44 mmol, 87%. <sup>1</sup>H NMR (400 MHz, CDCl<sub>3</sub>) δ 7.38 – 7.31 (m, 1H, Ar-H), 7.24-7.15 (m, 2H, Ar-H), 4.84 – 4.73 (m, 1H, CH), 3.96 (dd, *J* = 12.5, 3.2 Hz, 1H, NCHH), 3.83 – 3.74 (m, 2H, CH<sub>2</sub>OH), 3.69 (dd, *J* = 12.6, 3.8 Hz, 1H, NCHH), 3.43 (br-s, 1H, OH), 3.19 – 2.88 (m, 2H, CH(CH<sub>3</sub>)<sub>2</sub>), 1.24 (q, *J* = 7.5 Hz, 12H, CH<sub>3</sub>). <sup>13</sup>C NMR (101 MHz, CDCl<sub>3</sub>) δ 156.5 (C=O), 146.7, 146.3, 130.2, 128.4, 123.3, 123.2 (Ar-C), 72.9 (CH), 61.7 (NCH<sub>2</sub>), 48.9 (CH<sub>2</sub>OH), 27.7, 27.4 (CH(CH<sub>3</sub>)<sub>2</sub>), 23.5, 23.3, 23.2, 23.1 (CH<sub>3</sub>). HRMS (ESI) *m/z*: [M+Na]<sup>+</sup> Calcd for C<sub>16</sub>H<sub>23</sub>NO<sub>3</sub>Na 300.1570; Found 300.1564.

### 4-(((perfluorophenyl)amino)methyl)-1,3-dioxolan-2-one (3x)

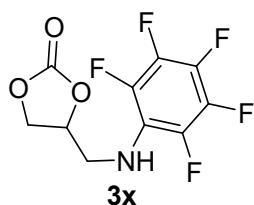

Dark solid, isolated in 107.6 mg, 0.38 mmol, 76%. <sup>1</sup>H NMR (400 MHz, CDCl<sub>3</sub>) δ 4.93 – 4.82 (m, 1H, CH), 4.03 – 3.95 (m, 2H, NCHH+OCHH), 3.90 (dd, *J* = 8.1, 6.5 Hz, 1H, NCHH), 3.75 (dd, *J* = 12.8, 3.9 Hz, 1H, OCHH), 3.01 (s, 1H, NH). <sup>13</sup>C NMR (101 MHz, Chloroform-*d*) δ 155.5 (C=O), 146.05 – 143.02 (m), 141.34 (m), 139.45 – 136.05 (m), 112.56 – 111.80 (m) (Ar-C), 75.4 (CH), 62.4 (NCH<sub>2</sub>), 47.4 (CH<sub>2</sub>OH). <sup>19</sup>F NMR (376 MHz, CDCl<sub>3</sub>) δ -144.31 (d, *J* = 21.0 Hz), -153.57 (t, *J* = 21.4 Hz), -161.09 – -161.41 (m). HRMS (ESI) *m/z*: [M+Na]<sup>+</sup> Calcd for C<sub>10</sub>H<sub>6</sub>F<sub>5</sub>NO<sub>3</sub> 306.0166; Found 306.0169.

**(S)-3-(4-chlorophenyl)-5-(hydroxymethyl)oxazolidin-2-one ((S)-2y)<sup>1</sup>**

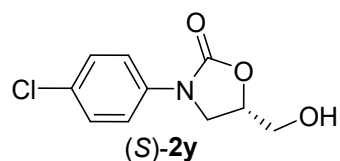

White solid, isolated in 99.0 mg, 0.44 mmol, 87%. <sup>1</sup>H NMR (400 MHz, CDCl<sub>3</sub>) δ 7.51 – 7.45 (m, 2H, Ar-H), 7.34 – 7.28 (m, 2H, Ar-H), 4.81 – 4.66 (m, 1H, CH), 4.07 – 3.92 (m, 3H, NCH<sub>2</sub>+CHHOH), 3.74 (dd, *J* = 12.7, 3.8 Hz, 1H, CHHOH), 2.74 (br-s, 1H, OH).

**Scheme S3 Preparation of linezolid.**

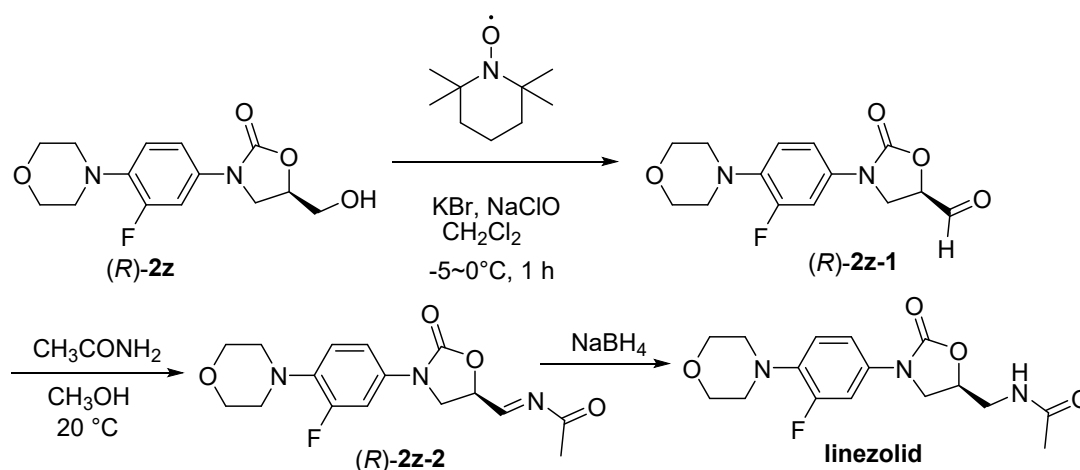

Following a reported procedure,<sup>5</sup> (R)-2z (1 g, 3.4 mmol) was dissolved in dichloromethane (5 mL). 20% potassium bromide aqueous solution (0.05 g) was added. The mixture was cooled to -5 °C, and 2,2,6,6-tetramethylpiperidinoxy (0.01 g, 0.05 mmol) was added, followed by dropwise addition of 6.5% sodium hypochlorite solution (10 g). The mixture was left at 0 °C for 1 hour, which was then extracted by dichloromethane (3 × 15 mL). The organic phase was combined, and dried with anhydrous sodium sulfate. The crude product (R)-2z-1 (0.73 g, 2.5 mmol, 90%) was obtained after removal of solvent.

The crude (R)-2z-1 (0.73 g) was dissolved in methanol (12 mL), and acetamide (0.15 g, 2.5 mmol) was added slowly. The reaction was monitored by liquid chromatography. After 24 h reaction, sodium borohydride (0.113 g, 3 mmol) was added, and linezolid (0.40 g, 1.1 mmol, 54% yield) was collected as a precipitate.

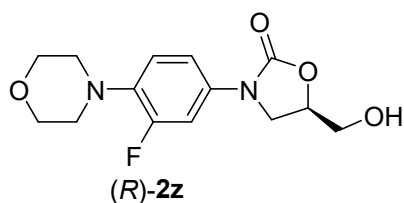

White solid.<sup>1</sup> <sup>1</sup>H NMR (400 MHz, CDCl<sub>3</sub>) δ 7.55 – 7.36 (m, 1H, Ar-H), 7.17 – 7.07 (m, 1H, Ar-H), 6.99 – 6.82 (m, 1H, Ar-H), 4.87 – 4.58 (m, 1H, CH), 4.03 – 3.90 (m, 3H, NCH<sub>2</sub>+CHHOH), 3.89 – 3.84 (m, 4H, OCH<sub>2</sub>CH<sub>2</sub>N), 3.74 (dd, *J* = 12.6, 4.0 Hz, 1H, CHHOH), 3.08 – 3.01 (m, 4H, OCH<sub>2</sub>CH<sub>2</sub>N), 2.64 (br-s, 1H, OH).

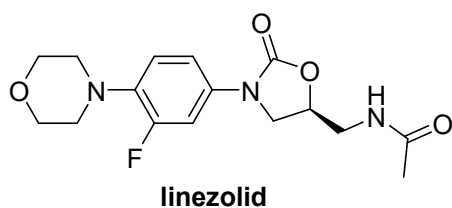

White solid.<sup>1</sup> <sup>1</sup>H NMR (400 MHz, CDCl<sub>3</sub>) δ 7.41 (m, 1H), 7.09 (m, 1H), 6.92 (m, 1H), 4.78 (m, 1H, CH), 4.05 (dd, *J* = 8.8, 6.3 Hz, 1H, NHCHH), 3.93 – 3.81 (m, 4H, OCH<sub>2</sub>CH<sub>2</sub>N), 3.65 (dd, *J* = 9.1, 6.3 Hz, 1H, NHCHH), 3.31 (t, *J* = 5.4 Hz, 2H, NCH<sub>2</sub>), 3.10 – 3.02 (m, 4H, OCH<sub>2</sub>CH<sub>2</sub>N), 2.39 (s, 3H, CH<sub>3</sub>).

**Scheme S4** Preparation of *N*-methyl-*N*-(oxiran-2-ylmethyl)aniline.

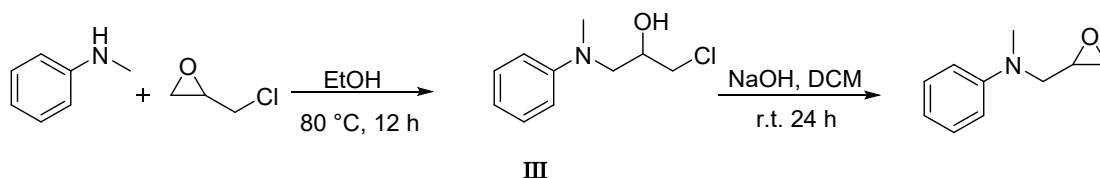

*N*-methyl aniline (20.0 mmol) and epichlorohydrin (22.0 mmol) were dissolved in ethanol (50 mL). The mixture was heated under reflux for 12 hours. After reaction, all volatiles were removed in vacuo, and the  $\gamma$ -chloro- $\beta$ -hydroxyaniline **III** was isolated by column chromatography (eluent: petroleum ether: ethyl acetate, from 100: 0 to 80: 20). It was then dissolved in dichloromethane (100 mL), and a 0.3 M sodium hydroxide aqueous solution (100 mL) was added. After overnight reaction at room temperature, the organic layer was separated, washed with brine (3  $\times$  100 mL) and dried over Na<sub>2</sub>SO<sub>4</sub>. Epoxy amine was obtained after removal of solvent.

***N*-methyl-*N*-(oxiran-2-ylmethyl)aniline<sup>6</sup>**

$^1\text{H}$  NMR (400 MHz,  $\text{CDCl}_3$ )  $\delta$  7.32 (t,  $J = 8.0$  Hz, 2H, Ar-H), 6.82 (dd,  $J = 13.4, 7.5$  Hz, 3H, Ar-H), 3.71 (dd,  $J = 15.7, 3.1$  Hz, 1H, CH), 3.45 (dd,  $J = 15.7, 4.9$  Hz, 1H, NCHH), 3.21 (t,  $J = 3.9$  Hz, 1H, NCHH), 3.06 (d,  $J = 1.7$  Hz, 3H,  $\text{CH}_3$ ), 2.84 (t,  $J = 4.5$  Hz, 1H, OCHH), 2.63 (dd,  $J = 5.1, 2.6$  Hz, 1H, OCHH).

### Reaction of phenylglycidylether and *N*-methyl epoxy amine with $\text{CO}_2$ .

**Table S6** Reaction of alkylene oxide with  $\text{CO}_2^a$ .

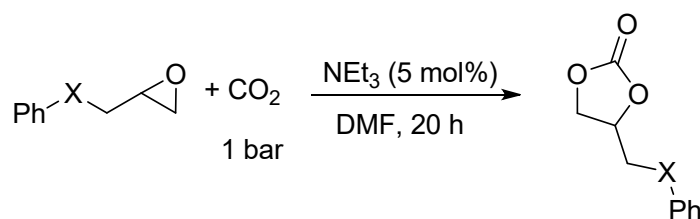

| Entry          | X                     | Temperature ( $^{\circ}\text{C}$ ) | Yield (%) |
|----------------|-----------------------|------------------------------------|-----------|
| 1              | O                     | 80                                 | 60        |
| 2 <sup>b</sup> | $\text{CH}_3\text{N}$ | 80                                 | -         |
| 3 <sup>b</sup> | $\text{CH}_3\text{N}$ | 120                                | 14        |

<sup>a</sup>Reaction conditions: alkylene oxide (1 mmol),  $\text{NEt}_3$  (5 mol%), DMF (1 mL), and  $\text{CO}_2$  (1 bar). Isolated yields. <sup>b</sup>Yields were determined by  $^1\text{H}$  NMR spectroscopy with mesitylene as an internal standard.

### 4-(phenoxyethyl)-1,3-dioxolan-2-one<sup>7</sup>

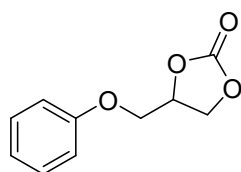

$^1\text{H}$  NMR (400 MHz,  $\text{CDCl}_3$ )  $\delta$  7.35 – 7.27 (m, 2H, Ar-H), 7.01 (t,  $J = 7.4$  Hz, 1H, Ar-H), 6.94 – 6.87 (m, 2H, Ar-H), 5.02 (m, 1H, CH), 4.60 (t,  $J = 8.4$  Hz, 1H, OCHH), 4.52 (dd,  $J = 8.5, 5.9$  Hz, 1H, OCHH), 4.23 (dd,  $J = 10.6, 4.1$  Hz, 1H, PhOCHH), 4.13 (dd,  $J = 10.6, 3.6$  Hz, 1H, PhOCHH).



## 4. Kinetic study

### Determination of rate order of CO<sub>2</sub>

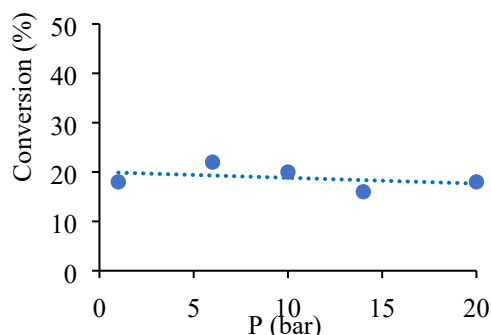

**Fig. S1** Plot of conversion of epoxy amine versus pressure (bar) for the reaction of *N*-(oxiran-2-ylmethyl)aniline (**1a**) and CO<sub>2</sub> catalyzed by NEt<sub>3</sub>. Conditions: *N*-(oxiran-2-ylmethyl)aniline (0.5 mmol), NEt<sub>3</sub> (5 mol %), 60 °C, 4 h.

### Determination of rate order of epoxy amine

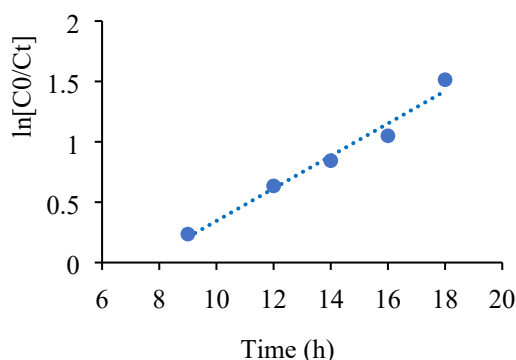

**Fig. S2** Plot of  $\ln[C_0/C_t]$  versus time (h) for the reaction of *N*-(oxiran-2-ylmethyl)aniline (**1a**) and CO<sub>2</sub> catalyzed by NEt<sub>3</sub>. Conditions: *N*-(oxiran-2-ylmethyl)aniline (0.5 mmol), NEt<sub>3</sub> (5 mol %), 60 °C.

Assuming that the reaction volume remains constant during the reaction, in the presence of 5 mol% NEt<sub>3</sub>, epoxy amine (1 mmol, 0.1492 g) and CO<sub>2</sub> (1 bar) reacted in DMF (1 mL) at 60 °C. The plot of the conversion rate of epoxy amine against time gave Fig. S3 (a), and  $t_{1/2}$  was determined to be 12.82 h. Changing the amount of epoxy amine to 1.25 mmol (0.1865 g), and keeping other conditions unchanged,  $t_{1/2}$ '

$$n = 1 + \frac{\lg \frac{t_{1/2}}{c_{1/2}}}{\lg \frac{c_{1/2}}{c_{1/2}}} = 1.27$$

was determined to be 12.05 h (Fig. S3 (b)). According to rate order of epoxy amine was determined to be first-order.

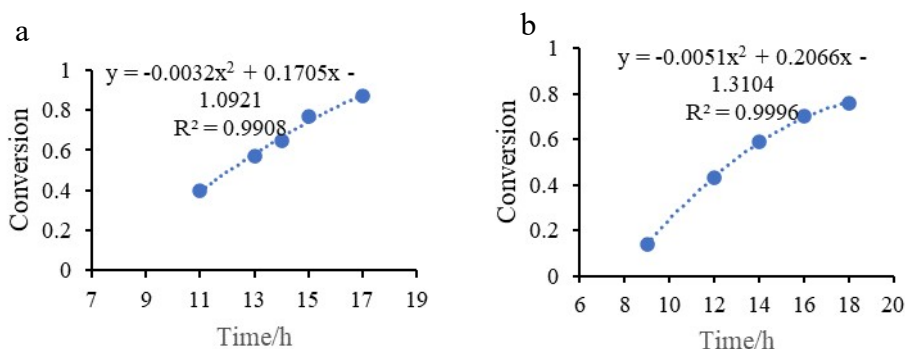

**Fig. S3** Plot of conversion of epoxy amine versus time (h) for the reaction of *N*-(oxiran-2-ylmethyl)aniline (**1a**) and CO<sub>2</sub> catalyzed by NEt<sub>3</sub>. a: **1a** (1 mmol), 0.5 mol% NEt<sub>3</sub>, 1 bar CO<sub>2</sub>. b: **1a** (1.25 mmol), 0.5 mol% NEt<sub>3</sub>, 1 bar CO<sub>2</sub>.

#### Determination of rate order of NEt<sub>3</sub>

##### Catalyst loading of 4 mol%:

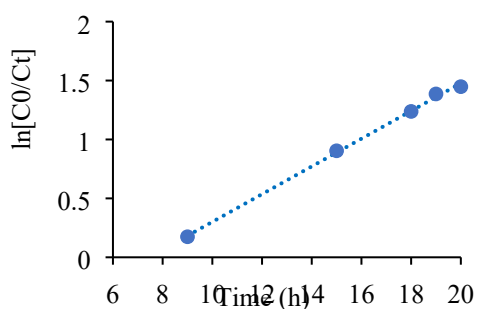

**Fig. S4** Plot of  $\ln[C_0/C_t]$  versus time (h) for the reaction of *N*-(oxiran-2-ylmethyl)aniline (**1a**) and CO<sub>2</sub> catalyzed by NEt<sub>3</sub>. Conditions: *N*-(oxiran-2-ylmethyl)aniline (0.5 mmol), NEt<sub>3</sub> (4 mol%), 60 °C.

**Catalyst loading of 3 mol%:**

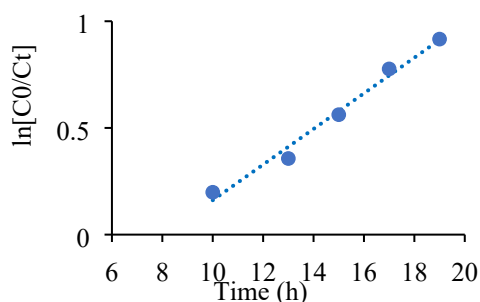

**Fig. S5** Plot of  $\ln[C_0/C_t]$  versus time (h) for the reaction of *N*-(oxiran-2-ylmethyl)aniline (**1a**) and CO<sub>2</sub> catalyzed by NEt<sub>3</sub>. Conditions: *N*-(oxiran-2-ylmethyl)aniline (0.5 mmol), NEt<sub>3</sub> (3 mol%), 60 °C.

**Catalyst loading of 2 mol%:**

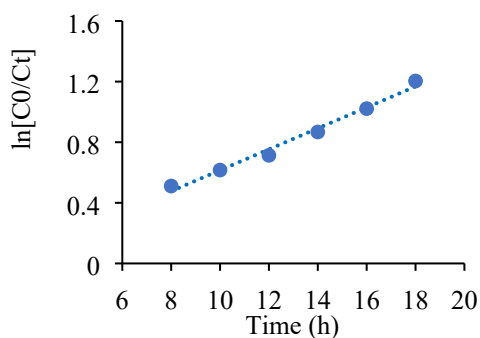

**Fig. S6** Plot of  $\ln[C_0/C_t]$  versus time (h) for the reaction of *N*-(oxiran-2-ylmethyl)aniline (**1a**) and CO<sub>2</sub> catalyzed by NEt<sub>3</sub>. Conditions: *N*-(oxiran-2-ylmethyl)aniline (0.5 mmol), NEt<sub>3</sub> (2 mol%), 60 °C.

**Catalyst loading of 1 mol%:**

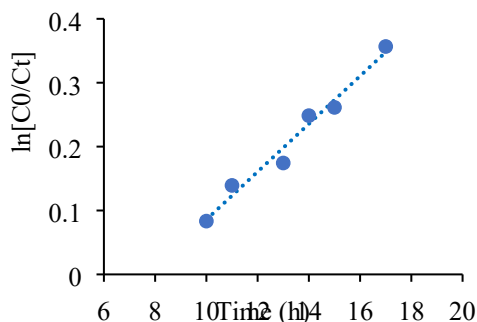

**Fig. S7** Plot of  $\ln[C_0/C_t]$  versus time (h) for the reaction of *N*-(oxiran-2-ylmethyl)aniline (**1a**) and CO<sub>2</sub> catalyzed by NEt<sub>3</sub>. Conditions: *N*-(oxiran-2-ylmethyl)aniline (0.5 mmol), NEt<sub>3</sub> (1 mol%), 60 °C.

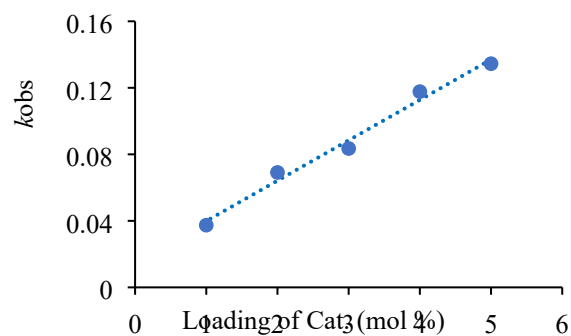

**Fig. S8** Plot of  $k_{obs}$  versus  $NEt_3$  (mol%) for the reaction of *N*-(oxiran-2-ylmethyl)aniline (**1a**) and  $CO_2$  catalyzed by  $NEt_3$ . Conditions: *N*-(oxiran-2-ylmethyl)aniline (0.5 mmol),  $CO_2$  (1 bar); loadings of  $NEt_3$ : 4, 3, 2 and 1 mol%; 60 °C.

**Table S7** Cycloaddition of epoxy amine and  $CO_2$  catalyzed by  $NEt_3$  at different temperature.<sup>a</sup>

| Entry | T (°C) | Time (h) | Yield (%) |
|-------|--------|----------|-----------|
| 1     | 40     | 10       | 10        |
| 2     | 40     | 14       | 18        |
| 3     | 40     | 16       | 24        |
| 4     | 40     | 18       | 28        |
| 5     | 40     | 19       | 32        |
| 7     | 50     | 8        | 16        |
| 8     | 50     | 10       | 26        |
| 9     | 50     | 12       | 29        |
| 10    | 50     | 14       | 37        |
| 12    | 50     | 18       | 45        |
| 13    | 50     | 19       | 50        |
| 14    | 60     | 9        | 21        |
| 15    | 60     | 12       | 47        |
| 16    | 60     | 14       | 57        |
| 17    | 60     | 16       | 65        |
| 18    | 60     | 18       | 78        |
| 20    | 70     | 6        | 34        |
| 21    | 70     | 8        | 50        |
| 22    | 70     | 12       | 72        |
| 23    | 70     | 14       | 78        |
| 24    | 70     | 16       | 82        |
| 25    | 70     | 17       | 86        |
| 27    | 80     | 6        | 57        |

|    |    |    |    |
|----|----|----|----|
| 28 | 80 | 8  | 70 |
| 29 | 80 | 10 | 80 |
| 30 | 80 | 12 | 87 |
| 31 | 80 | 14 | 91 |
| 32 | 80 | 16 | 96 |

<sup>a</sup>Reaction conditions: epoxy amine  $C_0 = 1.000$  mol/L, 50.00 mM  $\text{NEt}_3$ , 1 bar  $\text{CO}_2$ . Yields and selectivity were determined by  $^1\text{H}$  NMR spectroscopy with tetraethylsilane as an internal standard.

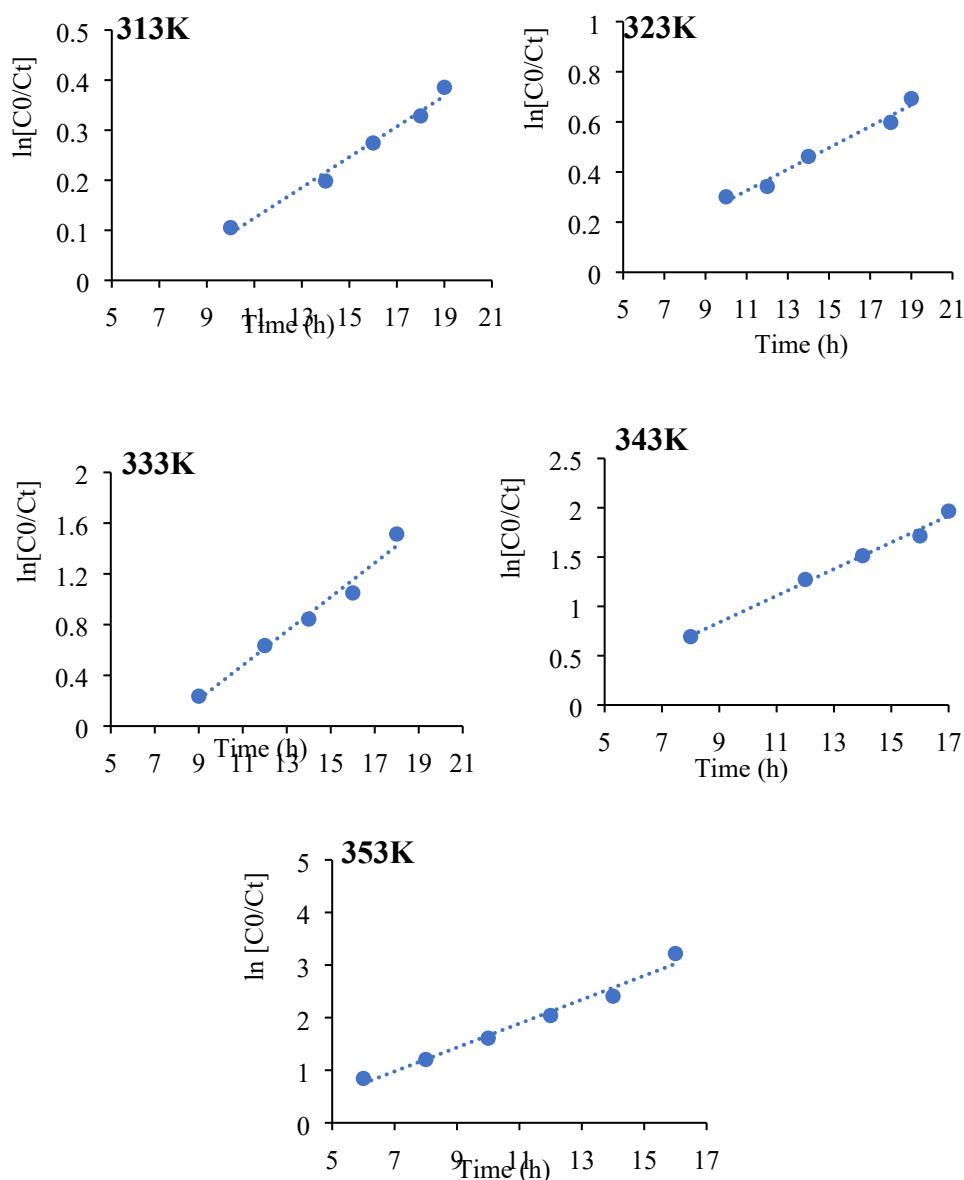

**Fig. S9** Plot of  $\ln[C_0/C_t]$  versus Time for the reaction of *N*-(oxiran-2-ylmethyl)aniline (**1a**) and  $\text{CO}_2$  catalyzed by  $\text{NEt}_3$ . Conditions: *N*-(oxiran-2-ylmethyl)aniline (0.5 mmol),  $\text{CO}_2$  (1 bar);  $\text{NEt}_3$  (5 mol%), temperature: 40, 50, 60, 70 and 80 °C.

**Table S8** Data for Eyring plot.

| Entry | T (K) | $k_{obs}$ (h <sup>-1</sup> ) | $k_{obs}$ (10 <sup>-5</sup> s <sup>-1</sup> ) | $k$ (10 <sup>-4</sup> ) <sup>a</sup> | ln( $k/T$ ) | 1/T (K <sup>-1</sup> ) |
|-------|-------|------------------------------|-----------------------------------------------|--------------------------------------|-------------|------------------------|
| 1     | 313   | 0.0305                       | 0.8472                                        | 1.6944                               | -14.4292    | 0.00319                |
| 2     | 323   | 0.0427                       | 1.1861                                        | 2.3722                               | -14.1241    | 0.00310                |
| 3     | 333   | 0.1345                       | 3.7361                                        | 7.4722                               | -13.0073    | 0.00300                |
| 4     | 343   | 0.1352                       | 3.7556                                        | 7.5111                               | -13.0317    | 0.00292                |
| 5     | 353   | 0.2247                       | 6.2417                                        | 12.4833                              | -12.5524    | 0.00283                |

<sup>a</sup>Calculated on the basis of the kinetic equation  $k_{obs} = k[\text{Cat.}]$

$$\ln \frac{k}{T} = -\frac{\Delta H}{R} \times \frac{1}{T} + \ln \frac{k_B}{h} + \frac{\Delta S}{R}$$
$$-\frac{\Delta H}{R} = -5376.4 \rightarrow \Delta H = (10.68 \pm 1.87) \text{ kcal/mol}$$
$$\ln \frac{k_B}{h} + \frac{\Delta S}{R} = 2.7455 \rightarrow \Delta S = (-42.99 \pm 5.65) \text{ cal/(mol}\cdot\text{K)}$$
$$\Delta G_{333\text{K}} = \Delta H - T\Delta S = (25.00 \pm 3.75) \text{ kcal/mol}$$

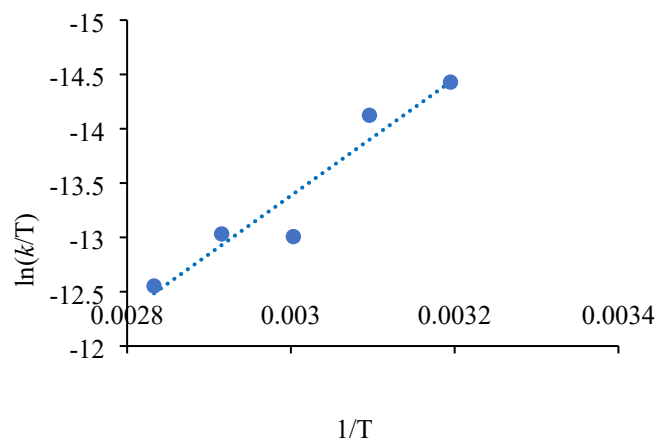

**Fig. S10** Plot of ln( $k/T$ ) versus ln( $1/T$ ) for the reaction of *N*-(oxiran-2-ylmethyl)aniline (**1a**) and CO<sub>2</sub> catalyzed by NEt<sub>3</sub>. Conditions: *N*-(oxiran-2-ylmethyl)aniline (0.5 mmol), CO<sub>2</sub> (1 bar); NEt<sub>3</sub> (5 mol%), temperature: 40, 50, 60, 70 and 80 °C.

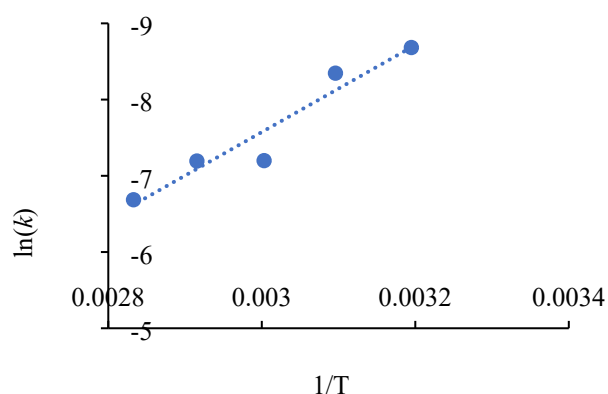

**Fig. S11** Plot of  $\ln(k)$  versus  $\ln(1/T)$  for the reaction of *N*-(oxiran-2-ylmethyl)aniline (**1a**) and  $\text{CO}_2$  catalyzed by  $\text{NEt}_3$ . Conditions: *N*-(oxiran-2-ylmethyl)aniline (0.5 mmol),  $\text{CO}_2$  (1 bar);  $\text{NEt}_3$  (5 mol%), temperature: 40, 50, 60, 70 and 80 °C.

## 5. Control experiments

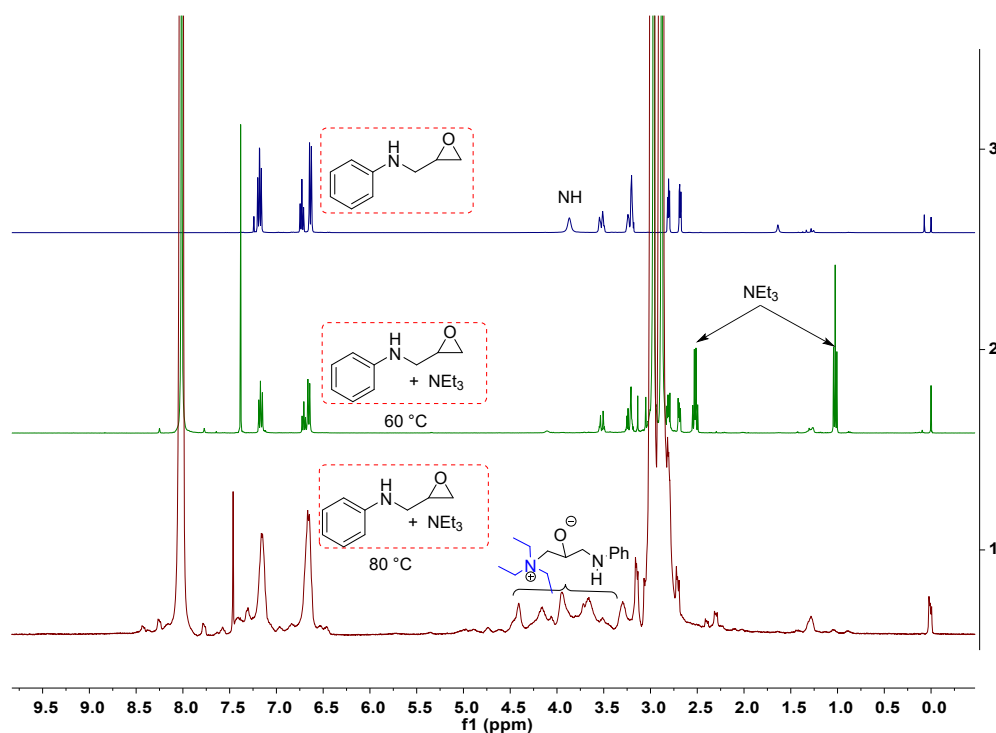

**Fig. S12** Reaction of epoxy amine with  $\text{NEt}_3$  at different temperatures.

After epoxy amine **1a** (0.5 mmol),  $\text{NEt}_3$  (0.5 mmol) and DMF (0.5 mL) were heated at 60 °C for 20 h without  $\text{CO}_2$ , NMR monitoring reveals disappearance of NH signal of **1a**, which may be due to the formation of hydrogen bond. Other peaks of **1a** did not change significantly (2<sup>nd</sup> spectrum, Fig. S12). Further reacting at 80 °C for 20 h led to S29

appearance of some new signals at 3.2-4.5 ppm (3<sup>rd</sup> spectrum, Fig. S12), which can be assigned to the ring-opened product.<sup>8</sup> 错误!未找到引用源。

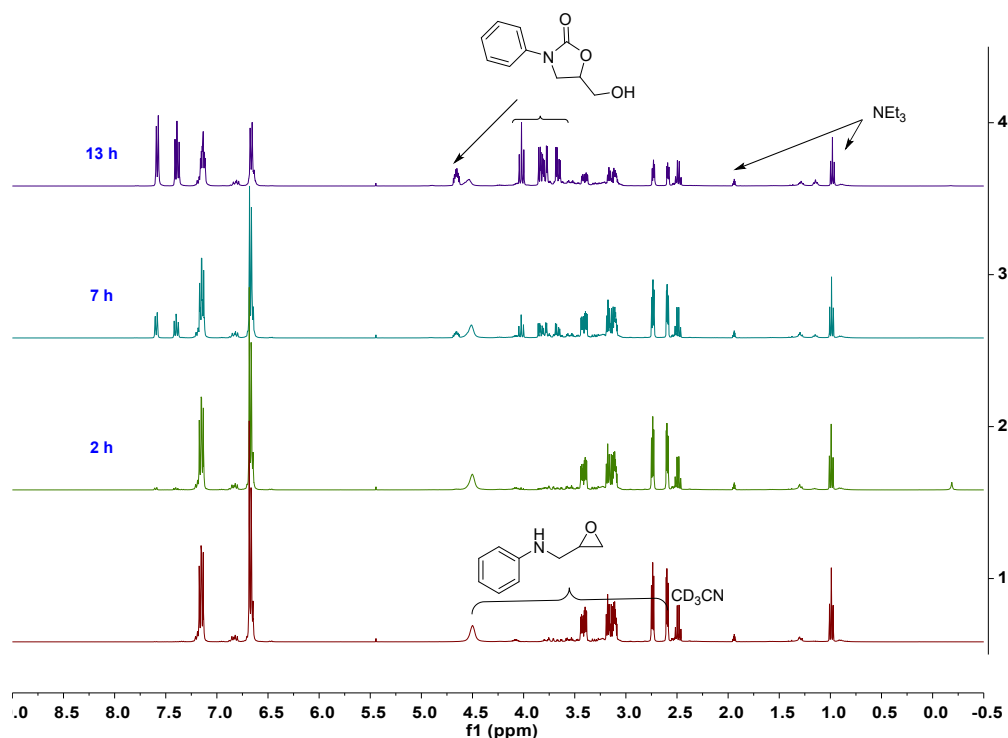

**Fig. S13.** NMR tube reaction between *N*-(oxiran-2-ylmethyl)aniline **1a** and CO<sub>2</sub> (CD<sub>3</sub>CN).

## 6. DFT study.

### Computational Details:

The B3LYP density functional method<sup>10</sup> combined with 6-31G(d) basis set<sup>11</sup> was employed to carry out all the geometry optimizations. Vibrational frequency analyses at the same level of theory were performed on all the optimized geometries to characterize stationary points as local minima (no imaginary frequency) or transition states (one imaginary frequency). In addition, intrinsic reaction coordinate (IRC) calculations were used to verify that the transition state connects with appropriate reactant and product.<sup>12</sup> The gas-phase Gibbs free energies for all species were obtained at 298.15 K and 1 atm at their respective optimized structures. The M06-2X functional<sup>13,14</sup> with larger basis set 6-311++G(d,p) was used in subsequent single-point energy calculations at the optimized structures with SMD solvation method,<sup>15</sup>



which was employed to consider the effect of solvation in *N,N*-Dimethylformamide solvent. The solvation Gibbs free energy was used for discussion and its value was obtained via the sum of solvation single-point energy and gas phase thermal correction to Gibbs free energy. All calculations were carried out with the Gaussian 09 suite of programs.<sup>16</sup>

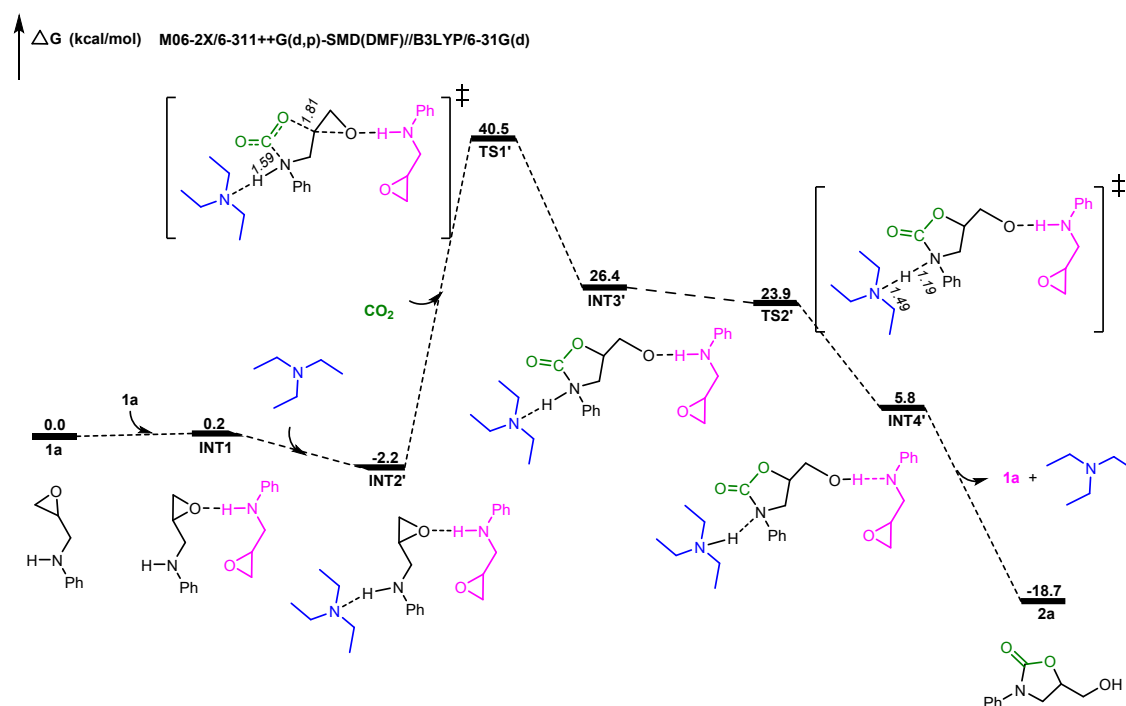

**Fig. S14.** Energy profile for the formation of the product **2a** via direct nucleophilic attack of  $\text{CO}_2$  with **1a** in the presence of  $\text{NEt}_3$  H-bonded with **1a**.

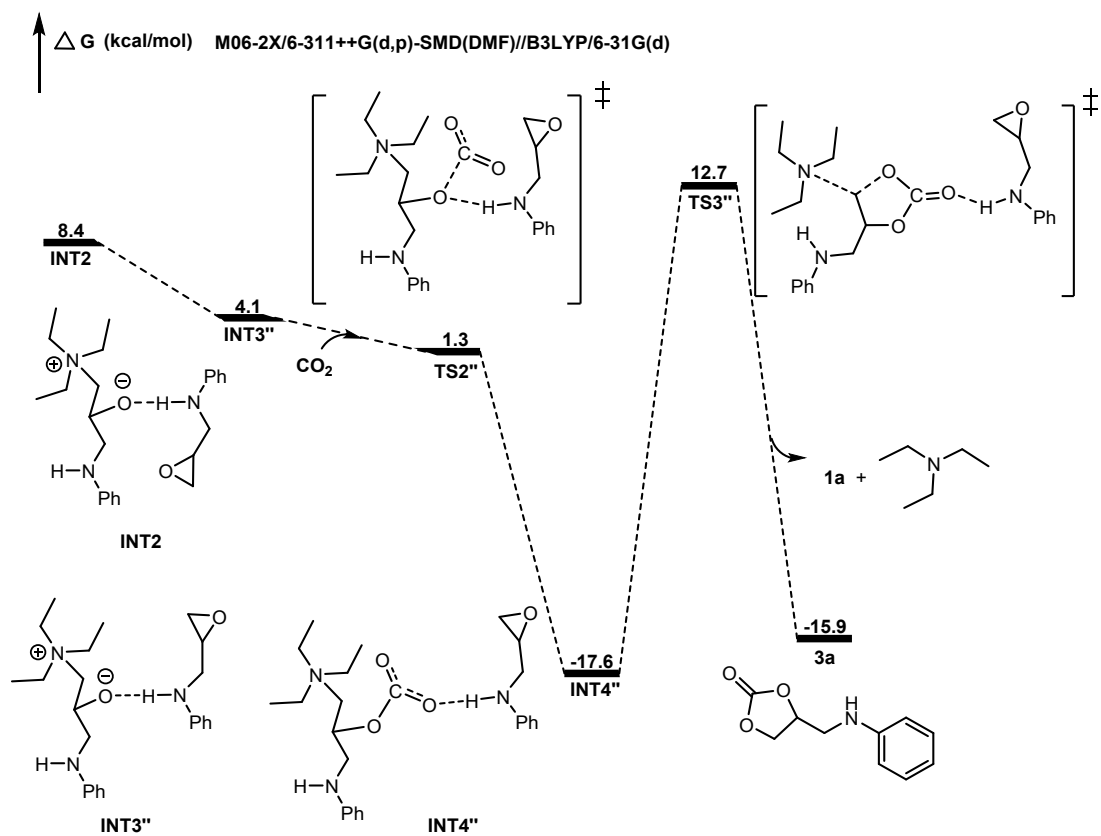

Fig. S15. Energy profile for the formation of **3a** via the CO<sub>2</sub> adduct with INT2.

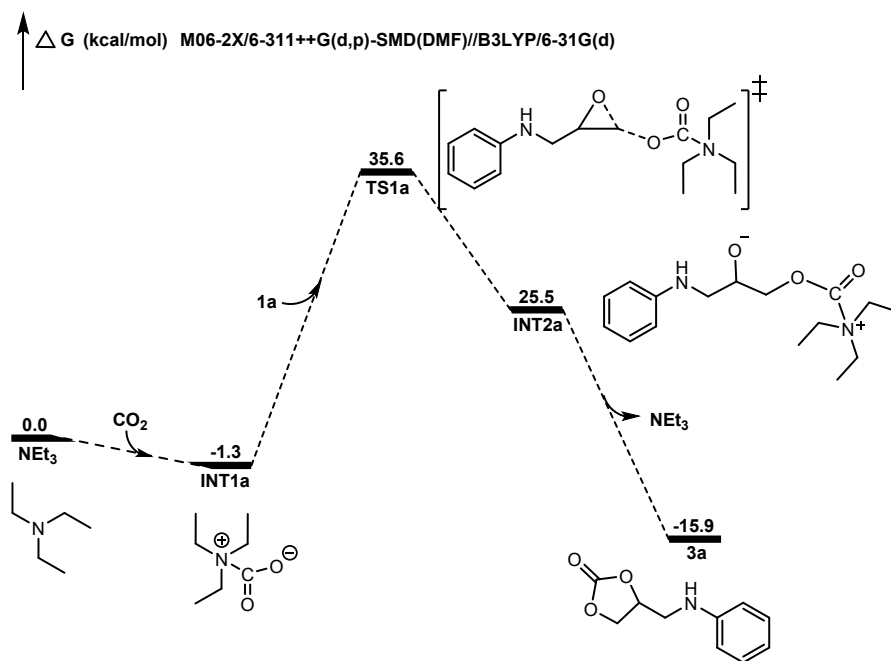

Fig. S16. Energy profile for the formation of **3a** via the CO<sub>2</sub> adduct with NEt<sub>3</sub>.

## Cartesian Coordinates and Energies

1a

|                                              |             |             |                             |
|----------------------------------------------|-------------|-------------|-----------------------------|
| C                                            | 3.11399900  | -1.10432500 | -0.11168300                 |
| C                                            | 1.74625700  | -1.28271600 | 0.05932000                  |
| C                                            | 0.88006100  | -0.17507500 | 0.15243500                  |
| C                                            | 1.43402900  | 1.11399300  | 0.06196400                  |
| C                                            | 2.81046000  | 1.27955300  | -0.10381200                 |
| C                                            | 3.66192800  | 0.17982300  | -0.19315800                 |
| H                                            | 3.75814700  | -1.97734300 | -0.18213500                 |
| H                                            | 1.33179300  | -2.28647000 | 0.12943200                  |
| H                                            | 0.79740800  | 1.99084500  | 0.11765400                  |
| H                                            | 3.21467500  | 2.28676700  | -0.17037700                 |
| H                                            | 4.73096300  | 0.31700500  | -0.32632900                 |
| N                                            | -0.48311500 | -0.39773900 | 0.36835900                  |
| H                                            | -0.79793400 | -1.30083000 | 0.03116400                  |
| C                                            | -1.46954500 | 0.64105900  | 0.12740700                  |
| H                                            | -1.46915900 | 0.99557200  | -0.91805800                 |
| H                                            | -1.24949000 | 1.50564800  | 0.76618900                  |
| C                                            | -2.83819900 | 0.11589100  | 0.48575700                  |
| C                                            | -4.01788200 | 0.39731300  | -0.34153500                 |
| H                                            | -2.98371400 | -0.12137700 | 1.54107000                  |
| H                                            | -3.91685800 | 1.01905700  | -1.23143000                 |
| H                                            | -5.00869800 | 0.39403200  | 0.11264300                  |
| O                                            | -3.36899800 | -0.87898000 | -0.40856200                 |
| Zero-point correction=                       |             |             | 0.185025 (Hartree/Particle) |
| Thermal correction to Energy=                |             |             | 0.194792                    |
| Thermal correction to Enthalpy=              |             |             | 0.195737                    |
| Thermal correction to Gibbs Free Energy=     |             |             | 0.148717                    |
| Sum of electronic and zero-point Energies=   |             |             | -479.318909                 |
| Sum of electronic and thermal Energies=      |             |             | -479.309141                 |
| Sum of electronic and thermal Enthalpies=    |             |             | -479.308197                 |
| Sum of electronic and thermal Free Energies= |             |             | -479.355217                 |
| M06-2X/6-311++G(d,p)/SMD//B3LYP/6-31G(d,p)   |             |             | energy= -479.44998640       |

INT1

|   |             |             |             |
|---|-------------|-------------|-------------|
| C | -0.89412700 | -1.07132900 | 1.33254700  |
| C | -0.95091900 | -0.87558200 | -0.17451600 |
| H | -0.88277100 | 0.19311400  | -0.39675300 |
| H | -0.07661000 | -1.34943100 | -0.63540900 |
| N | -2.14745800 | -1.42396700 | -0.78960100 |
| C | -3.41457800 | -0.85740900 | -0.62217900 |
| C | -3.60342700 | 0.46878600  | -0.18908100 |
| C | -4.55194100 | -1.62484500 | -0.94276700 |
| C | -4.89143500 | 0.99754200  | -0.09520700 |
| H | -2.75397200 | 1.09042000  | 0.07518100  |
| C | -5.82917000 | -1.08407100 | -0.84183100 |
| H | -4.42159800 | -2.65147700 | -1.28074200 |
| C | -6.01362300 | 0.23456700  | -0.41715400 |
| H | -5.01193900 | 2.02419100  | 0.24223400  |
| H | -6.68766000 | -1.70082900 | -1.09641500 |
| H | -7.01155100 | 0.65531000  | -0.33665000 |
| C | -0.06065200 | -2.11549400 | 1.94644200  |
| O | 0.35221200  | -0.73721600 | 1.97113700  |
| H | -2.16025400 | -2.43460800 | -0.84378400 |
| H | -1.77085200 | -0.72517000 | 1.88057700  |
| H | -0.32440700 | -2.52978000 | 2.91898800  |
| H | 0.54010500  | -2.76527800 | 1.30915700  |

|                                              |             |             |                             |
|----------------------------------------------|-------------|-------------|-----------------------------|
| C                                            | 4.66179300  | -2.00247800 | 0.06144700                  |
| C                                            | 3.67231900  | -1.15604800 | 0.54657000                  |
| C                                            | 3.45563300  | 0.11128000  | -0.03671200                 |
| C                                            | 4.26486500  | 0.48863100  | -1.12501500                 |
| C                                            | 5.25905900  | -0.37046400 | -1.59743000                 |
| C                                            | 5.46841600  | -1.61952600 | -1.01577000                 |
| H                                            | 4.80743900  | -2.97223300 | 0.53185900                  |
| H                                            | 3.05840300  | -1.45484300 | 1.39255700                  |
| H                                            | 4.12157900  | 1.44927800  | -1.60892700                 |
| H                                            | 5.87106100  | -0.05360900 | -2.43873300                 |
| H                                            | 6.24187700  | -2.28297500 | -1.39148700                 |
| N                                            | 2.47715000  | 0.94216400  | 0.50111200                  |
| H                                            | 1.74764300  | 0.44648200  | 1.00793300                  |
| C                                            | 2.03399100  | 2.13385700  | -0.19307700                 |
| H                                            | 1.62563700  | 1.92326000  | -1.19795000                 |
| H                                            | 2.88913400  | 2.81085000  | -0.33072900                 |
| C                                            | 0.99022800  | 2.86280300  | 0.61620400                  |
| C                                            | -0.05009700 | 3.67362100  | -0.02907600                 |
| H                                            | 1.28462800  | 3.11077800  | 1.63709200                  |
| H                                            | -0.08201200 | 3.74343300  | -1.11654900                 |
| H                                            | -0.48478400 | 4.51927300  | 0.50328200                  |
| O                                            | -0.36533100 | 2.38264500  | 0.51065200                  |
| Zero-point correction=                       |             |             | 0.371212 (Hartree/Particle) |
| Thermal correction to Energy=                |             |             | 0.392807                    |
| Thermal correction to Enthalpy=              |             |             | 0.393751                    |
| Thermal correction to Gibbs Free Energy=     |             |             | 0.314879                    |
| Sum of electronic and zero-point Energies=   |             |             | -958.644815                 |
| Sum of electronic and thermal Energies=      |             |             | -958.623219                 |
| Sum of electronic and thermal Enthalpies=    |             |             | -958.622275                 |
| Sum of electronic and thermal Free Energies= |             |             | -958.701147                 |
| M06-2X/6-311++G(d,p)/SMD//B3LYP/6-31G(d,p)   |             |             | energy= -958.90570307       |

### NEt<sub>3</sub>

|                               |             |             |                             |
|-------------------------------|-------------|-------------|-----------------------------|
| N                             | 0.04269800  | -0.27272600 | 0.56130400                  |
| C                             | -1.32397200 | -0.77820900 | 0.63884500                  |
| H                             | -1.25654700 | -1.85512500 | 0.85026100                  |
| H                             | -1.79354700 | -0.32275400 | 1.52072800                  |
| C                             | -2.25131600 | -0.58696800 | -0.57813200                 |
| H                             | -3.20298000 | -1.10575000 | -0.40750300                 |
| H                             | -2.47773300 | 0.46819000  | -0.76206000                 |
| H                             | -1.80762800 | -1.00118900 | -1.49072300                 |
| C                             | 0.88235900  | -0.92814800 | -0.43532500                 |
| H                             | 0.61133400  | -1.99184300 | -0.42849400                 |
| H                             | 0.69409000  | -0.57438600 | -1.46669500                 |
| C                             | 2.37951100  | -0.80632000 | -0.13570900                 |
| H                             | 2.59736500  | -1.16073300 | 0.87750400                  |
| H                             | 2.95549400  | -1.40852200 | -0.84763500                 |
| H                             | 2.73552400  | 0.22641500  | -0.21864600                 |
| C                             | 0.22808100  | 1.16719000  | 0.72704200                  |
| H                             | 1.23497300  | 1.33569600  | 1.13206400                  |
| H                             | -0.46706200 | 1.49094000  | 1.51162900                  |
| C                             | 0.05550300  | 2.07497200  | -0.50707800                 |
| H                             | -0.96045100 | 2.03898600  | -0.91206900                 |
| H                             | 0.27105500  | 3.11521800  | -0.23337000                 |
| H                             | 0.74622900  | 1.79883500  | -1.31197000                 |
| Zero-point correction=        |             |             | 0.206960 (Hartree/Particle) |
| Thermal correction to Energy= |             |             | 0.216410                    |

|                                              |                       |
|----------------------------------------------|-----------------------|
| Thermal correction to Enthalpy=              | 0.217354              |
| Thermal correction to Gibbs Free Energy=     | 0.172966              |
| Sum of electronic and zero-point Energies=   | -292.205724           |
| Sum of electronic and thermal Energies=      | -292.196274           |
| Sum of electronic and thermal Enthalpies=    | -292.195330           |
| Sum of electronic and thermal Free Energies= | -292.239718           |
| M06-2X/6-311++G(d,p)/SMD//B3LYP/6-31G(d,p)   | energy= -292.34363588 |

**TS1**

|   |             |             |             |
|---|-------------|-------------|-------------|
| C | 0.38097200  | -0.17398900 | -0.76024300 |
| C | 0.24655800  | 0.36651500  | 0.67556300  |
| H | -0.43980300 | 1.22266800  | 0.63352300  |
| H | -0.24405300 | -0.39913200 | 1.28644200  |
| N | 1.51569200  | 0.71353600  | 1.32982300  |
| C | 2.13039600  | 1.96781500  | 1.13811700  |
| C | 1.71460300  | 2.88420300  | 0.15757200  |
| C | 3.23597300  | 2.30013600  | 1.94547000  |
| C | 2.39971400  | 4.09065000  | -0.00277000 |
| H | 0.84321800  | 2.68619200  | -0.45683400 |
| C | 3.90430700  | 3.50856200  | 1.77882400  |
| H | 3.56548700  | 1.59689800  | 2.70888800  |
| C | 3.49541200  | 4.41490000  | 0.79635100  |
| H | 2.05498400  | 4.78931800  | -0.76111000 |
| H | 4.75078500  | 3.74213900  | 2.42022000  |
| H | 4.01818600  | 5.35775400  | 0.66344100  |
| C | 0.77450500  | -1.61675100 | -0.94616000 |
| O | -0.82187300 | -0.48333000 | -1.33590000 |
| H | 1.52682600  | 0.45060500  | 2.30823400  |
| H | 1.01957000  | 0.51110000  | -1.34993800 |
| H | 0.82691900  | -1.90355700 | -1.99010900 |
| H | 0.23115500  | -2.30253200 | -0.30608000 |
| N | 2.56201700  | -2.27099200 | -0.53950200 |
| C | 3.43936200  | -1.15045200 | -1.00598200 |
| H | 3.02622100  | -0.83011900 | -1.96875700 |
| H | 3.28101700  | -0.32866500 | -0.30483900 |
| C | 4.93701800  | -1.42126300 | -1.18849400 |
| H | 5.40150000  | -0.49391100 | -1.54146900 |
| H | 5.44095700  | -1.70517800 | -0.26175100 |
| H | 5.13984400  | -2.19038500 | -1.94034700 |
| C | 2.76585400  | -3.49834700 | -1.35725000 |
| H | 2.67390700  | -3.18642100 | -2.40404800 |
| H | 3.79343900  | -3.85753200 | -1.22630500 |
| C | 1.79242200  | -4.64292900 | -1.07559000 |
| H | 0.75055000  | -4.35334700 | -1.23350300 |
| H | 2.01608600  | -5.46461400 | -1.76411700 |
| H | 1.89267200  | -5.03515400 | -0.05888800 |
| C | 2.58906400  | -2.50629000 | 0.93283200  |
| H | 1.70199400  | -3.10224600 | 1.16839400  |
| H | 2.44192600  | -1.52254900 | 1.38422400  |
| C | 3.81966900  | -3.19485400 | 1.53248700  |
| H | 4.71872000  | -2.57683300 | 1.47618400  |
| H | 3.62255200  | -3.38811400 | 2.59311600  |
| H | 4.03521500  | -4.15965400 | 1.06173800  |
| C | -4.70694900 | -2.55975800 | 1.24650900  |
| C | -3.81306700 | -1.69333300 | 0.63182900  |
| C | -4.20409100 | -0.38164100 | 0.27278500  |
| C | -5.53133300 | 0.01017200  | 0.54787400  |

|                                              |             |             |                             |
|----------------------------------------------|-------------|-------------|-----------------------------|
| C                                            | -6.41660300 | -0.87368300 | 1.16659600                  |
| C                                            | -6.02054900 | -2.16199700 | 1.52455500                  |
| H                                            | -4.37789900 | -3.56382400 | 1.50729300                  |
| H                                            | -2.79916500 | -2.00980800 | 0.39848800                  |
| H                                            | -5.86860800 | 1.00849400  | 0.28624700                  |
| H                                            | -7.43333800 | -0.54330700 | 1.36909000                  |
| H                                            | -6.71679600 | -2.84369100 | 2.00482100                  |
| N                                            | -3.27966400 | 0.45970500  | -0.30546800                 |
| H                                            | -2.39881200 | 0.03036800  | -0.62283400                 |
| C                                            | -3.65998700 | 1.67377500  | -0.99381500                 |
| H                                            | -4.01861400 | 2.43865400  | -0.28807100                 |
| H                                            | -4.48240800 | 1.49265000  | -1.71180800                 |
| C                                            | -2.48151100 | 2.23623000  | -1.75304700                 |
| C                                            | -2.37146800 | 3.67102800  | -2.04240200                 |
| H                                            | -1.97275100 | 1.52534400  | -2.40392500                 |
| H                                            | -3.14503700 | 4.35540700  | -1.69113800                 |
| H                                            | -1.82791600 | 4.00626300  | -2.92641000                 |
| O                                            | -1.57268300 | 3.07568000  | -1.01181300                 |
| Zero-point correction=                       |             |             | 0.580767 (Hartree/Particle) |
| Thermal correction to Energy=                |             |             | 0.612038                    |
| Thermal correction to Enthalpy=              |             |             | 0.612983                    |
| Thermal correction to Gibbs Free Energy=     |             |             | 0.513660                    |
| Sum of electronic and zero-point Energies=   |             |             | -1250.808673                |
| Sum of electronic and thermal Energies=      |             |             | -1250.777402                |
| Sum of electronic and thermal Enthalpies=    |             |             | -1250.776457                |
| Sum of electronic and thermal Free Energies= |             |             | -1250.875780                |
| M06-2X/6-311++G(d,p)/SMD//B3LYP/6-31G(d,p)   |             |             | energy= -1251.22622626      |

## INT2

|   |             |             |             |
|---|-------------|-------------|-------------|
| C | -0.34175600 | -0.42539900 | 0.61481000  |
| C | -0.18731900 | 0.08011400  | -0.84476900 |
| H | 0.60040100  | 0.84390200  | -0.82009300 |
| H | 0.19839600  | -0.74713600 | -1.45167700 |
| N | -1.40626500 | 0.58007000  | -1.51048400 |
| C | -1.88292700 | 1.89280500  | -1.28837900 |
| C | -1.37283500 | 2.73845300  | -0.28937200 |
| C | -2.94558000 | 2.35812900  | -2.08796900 |
| C | -1.92434100 | 4.00844700  | -0.10476100 |
| H | -0.53152900 | 2.43897000  | 0.32543900  |
| C | -3.48054000 | 3.62831100  | -1.89737600 |
| H | -3.34635000 | 1.71070600  | -2.86673600 |
| C | -2.97762100 | 4.46474500  | -0.89677700 |
| H | -1.50328800 | 4.64943300  | 0.66556900  |
| H | -4.29530600 | 3.96515000  | -2.53401800 |
| H | -3.39487200 | 5.45633400  | -0.74566500 |
| C | -1.10435600 | -1.79216000 | 0.79062300  |
| O | 0.85024600  | -0.75242900 | 1.14713500  |
| H | -1.39623800 | 0.37710600  | -2.50489700 |
| H | -0.90961800 | 0.35404500  | 1.17730100  |
| H | -0.96162300 | -2.04152200 | 1.84273800  |
| H | -0.59913200 | -2.53835400 | 0.17675900  |
| N | -2.66299500 | -2.03065000 | 0.55586100  |
| C | -3.37288500 | -0.78490800 | 1.08537500  |
| H | -2.80505500 | -0.48840500 | 1.96960300  |
| H | -3.21317400 | -0.01537100 | 0.32930000  |
| C | -4.84986500 | -0.90072100 | 1.46123100  |
| H | -5.17866000 | 0.10176300  | 1.75571900  |

|                                              |             |             |                             |
|----------------------------------------------|-------------|-------------|-----------------------------|
| H                                            | -5.49342900 | -1.22543400 | 0.64180100                  |
| H                                            | -5.01880900 | -1.55836300 | 2.31856200                  |
| C                                            | -3.08527500 | -3.24300200 | 1.36199900                  |
| H                                            | -2.91251100 | -2.97420700 | 2.40799400                  |
| H                                            | -4.16106100 | -3.36974000 | 1.22762600                  |
| C                                            | -2.36361300 | -4.54547100 | 1.02879400                  |
| H                                            | -1.28446300 | -4.47788300 | 1.18186100                  |
| H                                            | -2.74719400 | -5.32003900 | 1.70122900                  |
| H                                            | -2.55454100 | -4.88142700 | 0.00529100                  |
| C                                            | -2.87742600 | -2.23097700 | -0.93359400                 |
| H                                            | -2.20447900 | -3.04175800 | -1.21909500                 |
| H                                            | -2.50613700 | -1.30739100 | -1.38475900                 |
| C                                            | -4.29254300 | -2.53535100 | -1.41684200                 |
| H                                            | -4.96358800 | -1.67889800 | -1.32111200                 |
| H                                            | -4.22747700 | -2.77336700 | -2.48433200                 |
| H                                            | -4.74995900 | -3.39880300 | -0.92299500                 |
| C                                            | 4.64707200  | -2.58353600 | -1.39610500                 |
| C                                            | 3.75765800  | -1.74258100 | -0.74195500                 |
| C                                            | 4.17517700  | -0.47610400 | -0.26434400                 |
| C                                            | 5.52400300  | -0.10853300 | -0.45824600                 |
| C                                            | 6.40433800  | -0.96781500 | -1.11797100                 |
| C                                            | 5.98209600  | -2.20778800 | -1.59656700                 |
| H                                            | 4.29907200  | -3.55300200 | -1.74858300                 |
| H                                            | 2.72817500  | -2.03940600 | -0.55641200                 |
| H                                            | 5.88045100  | 0.85376400  | -0.10292300                 |
| H                                            | 7.43802700  | -0.65689000 | -1.25697200                 |
| H                                            | 6.67454500  | -2.87051200 | -2.10841600                 |
| N                                            | 3.25109000  | 0.34084700  | 0.34536500                  |
| H                                            | 2.34212400  | -0.10022900 | 0.59394600                  |
| C                                            | 3.63855700  | 1.44913900  | 1.18881300                  |
| H                                            | 4.05868400  | 2.28211200  | 0.60346700                  |
| H                                            | 4.41545400  | 1.15269400  | 1.92022300                  |
| C                                            | 2.43566300  | 1.95720400  | 1.95042900                  |
| C                                            | 2.38121500  | 3.32607300  | 2.47596000                  |
| H                                            | 1.83797200  | 1.17792700  | 2.42370100                  |
| H                                            | 3.21728700  | 4.00593600  | 2.30331400                  |
| H                                            | 1.79015500  | 3.54386200  | 3.36675600                  |
| O                                            | 1.63519900  | 2.97219400  | 1.30502200                  |
| Zero-point correction=                       |             |             | 0.583245 (Hartree/Particle) |
| Thermal correction to Energy=                |             |             | 0.614165                    |
| Thermal correction to Enthalpy=              |             |             | 0.615109                    |
| Thermal correction to Gibbs Free Energy=     |             |             | 0.516293                    |
| Sum of electronic and zero-point Energies=   |             |             | -1250.811515                |
| Sum of electronic and thermal Energies=      |             |             | -1250.780595                |
| Sum of electronic and thermal Enthalpies=    |             |             | -1250.779651                |
| Sum of electronic and thermal Free Energies= |             |             | -1250.878466                |
| M06-2X/6-311++G(d,p)/SMD//B3LYP/6-31G(d,p)   |             |             | energy= -1251.25333989      |

### INT3

|   |             |             |             |
|---|-------------|-------------|-------------|
| C | 0.42404600  | -0.00715700 | -1.19272700 |
| C | 0.80161000  | 0.51936200  | 0.21353300  |
| H | 1.23447500  | 1.51490700  | 0.06589500  |
| H | -0.09410400 | 0.65251000  | 0.82538600  |
| N | 1.72290400  | -0.36682900 | 0.94547100  |
| C | 3.11401900  | -0.32026200 | 0.68315200  |
| C | 3.66486400  | 0.38352500  | -0.40043300 |
| C | 3.97669400  | -1.04505600 | 1.52660900  |

|   |             |             |             |
|---|-------------|-------------|-------------|
| C | 5.04289100  | 0.34715400  | -0.62695700 |
| H | 3.03508900  | 0.98159900  | -1.04987600 |
| C | 5.34858000  | -1.06347200 | 1.29652300  |
| H | 3.55846700  | -1.59343900 | 2.36920700  |
| C | 5.89395100  | -0.37151500 | 0.21125700  |
| H | 5.44976200  | 0.90391700  | -1.46716200 |
| H | 5.99456100  | -1.62367500 | 1.96811100  |
| H | 6.96446700  | -0.38874800 | 0.02849700  |
| C | -0.74265100 | -1.03459600 | -1.30855000 |
| O | 0.00312700  | 1.02642100  | -2.03339900 |
| H | 1.55215600  | -0.33771400 | 1.94511600  |
| H | 1.32365000  | -0.45018100 | -1.64004600 |
| H | -0.81144700 | -1.28178000 | -2.37060600 |
| H | -1.66718800 | -0.54044300 | -1.00771600 |
| N | -0.73096400 | -2.40409900 | -0.57579600 |
| C | 0.66698600  | -2.99776900 | -0.75507000 |
| H | 0.85678300  | -2.94422000 | -1.83090700 |
| H | 1.33933900  | -2.30174000 | -0.25211700 |
| C | 0.91164100  | -4.41668800 | -0.25224900 |
| H | 1.92822400  | -4.68883200 | -0.55613700 |
| H | 0.87579200  | -4.48851700 | 0.83685500  |
| H | 0.23609600  | -5.16245800 | -0.68079000 |
| C | -1.74632200 | -3.30860500 | -1.25852300 |
| H | -1.33617400 | -3.51066100 | -2.25244500 |
| H | -1.74948300 | -4.24839300 | -0.70588400 |
| C | -3.16052900 | -2.75067000 | -1.36976700 |
| H | -3.22040500 | -1.90065600 | -2.05128800 |
| H | -3.80033000 | -3.54689800 | -1.76581400 |
| H | -3.57244500 | -2.43166000 | -0.40931900 |
| C | -1.07984100 | -2.16709600 | 0.90084900  |
| H | -1.80370400 | -1.35010600 | 0.91389600  |
| H | -0.15336700 | -1.80351300 | 1.34522000  |
| C | -1.64188700 | -3.34485500 | 1.69367500  |
| H | -0.98056300 | -4.21246300 | 1.73072000  |
| H | -1.77995000 | -2.99252800 | 2.72162300  |
| H | -2.62340300 | -3.66664800 | 1.33626600  |
| C | -4.47102300 | 0.31001800  | -0.07592700 |
| C | -3.44873600 | 1.05216500  | -0.65166900 |
| C | -2.55944300 | 1.86699500  | 0.12828800  |
| C | -2.81868700 | 1.86849800  | 1.54000400  |
| C | -3.84075700 | 1.10267900  | 2.09920100  |
| C | -4.67710100 | 0.30225000  | 1.31388100  |
| H | -5.14182600 | -0.25619800 | -0.72230500 |
| H | -3.32881800 | 1.08303200  | -1.73311300 |
| H | -2.20902400 | 2.48433700  | 2.19440800  |
| H | -3.99282600 | 1.14021200  | 3.17782800  |
| H | -5.48877800 | -0.26749000 | 1.75824400  |
| N | -1.56678300 | 2.53663500  | -0.49994700 |
| H | -0.63777100 | 1.65512800  | -1.49807500 |
| C | -0.85944900 | 3.52330900  | 0.28076000  |
| H | -0.29264000 | 3.11801300  | 1.14757000  |
| H | -1.55498700 | 4.26911400  | 0.71612500  |
| C | 0.13190200  | 4.27490700  | -0.57872100 |
| C | 1.27934000  | 4.98503200  | 0.00152600  |
| H | -0.26677000 | 4.62557400  | -1.53188800 |
| H | 1.44123000  | 4.95386300  | 1.08045200  |
| H | 1.69283300  | 5.86219400  | -0.49830500 |



|                                              |            |            |                             |
|----------------------------------------------|------------|------------|-----------------------------|
| O                                            | 1.47017100 | 3.74054100 | -0.68381400                 |
| Zero-point correction=                       |            |            | 0.583476 (Hartree/Particle) |
| Thermal correction to Energy=                |            |            | 0.613676                    |
| Thermal correction to Enthalpy=              |            |            | 0.614621                    |
| Thermal correction to Gibbs Free Energy=     |            |            | 0.520224                    |
| Sum of electronic and zero-point Energies=   |            |            | -1250.801084                |
| Sum of electronic and thermal Energies=      |            |            | -1250.770883                |
| Sum of electronic and thermal Enthalpies=    |            |            | -1250.769939                |
| Sum of electronic and thermal Free Energies= |            |            | -1250.864335                |
| M06-2X/6-311++G(d,p)/SMD//B3LYP/6-31G(d,p)   |            |            | energy= -1251.26194212      |

**CO<sub>2</sub>**

|                                              |            |            |                             |
|----------------------------------------------|------------|------------|-----------------------------|
| C                                            | 0.00000000 | 0.00000000 | 0.00000000                  |
| O                                            | 0.00000000 | 0.00000000 | 1.16915600                  |
| O                                            | 0.00000000 | 0.00000000 | -1.16915600                 |
| Zero-point correction=                       |            |            | 0.011593 (Hartree/Particle) |
| Thermal correction to Energy=                |            |            | 0.014240                    |
| Thermal correction to Enthalpy=              |            |            | 0.015184                    |
| Thermal correction to Gibbs Free Energy=     |            |            | -0.009126                   |
| Sum of electronic and zero-point Energies=   |            |            | -188.569347                 |
| Sum of electronic and thermal Energies=      |            |            | -188.566700                 |
| Sum of electronic and thermal Enthalpies=    |            |            | -188.565756                 |
| Sum of electronic and thermal Free Energies= |            |            | -188.590066                 |
| M06-2X/6-311++G(d,p)/SMD//B3LYP/6-31G(d,p)   |            |            | energy= -188.57624548       |

**TS2**

|   |             |             |             |
|---|-------------|-------------|-------------|
| C | 0.38278900  | 0.02878600  | -1.12106200 |
| C | 0.67122200  | 0.57634100  | 0.30037300  |
| H | 0.94620200  | 1.62956400  | 0.17778400  |
| H | -0.23826700 | 0.55470200  | 0.90779000  |
| N | 1.71428600  | -0.17164000 | 1.02635200  |
| C | 3.08361400  | 0.08585500  | 0.77020000  |
| C | 3.52613700  | 0.89219100  | -0.29145700 |
| C | 4.04263200  | -0.52647200 | 1.59900800  |
| C | 4.89488900  | 1.06527600  | -0.51061800 |
| H | 2.81556000  | 1.40856500  | -0.92739400 |
| C | 5.40275400  | -0.33652600 | 1.37643900  |
| H | 3.70768700  | -1.15344500 | 2.42390400  |
| C | 5.84159100  | 0.45723000  | 0.31287600  |
| H | 5.21668300  | 1.69845800  | -1.33347800 |
| H | 6.12332800  | -0.81363800 | 2.03629800  |
| H | 6.90327300  | 0.60273300  | 0.13534800  |
| C | -0.58177600 | -1.19491400 | -1.23452700 |
| O | -0.24301900 | 0.96338900  | -1.92447700 |
| H | 1.54111400  | -0.17591100 | 2.02623500  |
| H | 1.34949200  | -0.24913200 | -1.57154400 |
| H | -0.65861900 | -1.40158100 | -2.30418100 |
| H | -1.56077300 | -0.88742200 | -0.86762200 |
| N | -0.30163300 | -2.58542900 | -0.58053500 |
| C | 1.16550500  | -2.91209400 | -0.85401500 |
| H | 1.29110800  | -2.75013200 | -1.92812400 |
| H | 1.73181900  | -2.14473100 | -0.32601500 |
| C | 1.67585000  | -4.29842500 | -0.47332300 |
| H | 2.70894900  | -4.36450100 | -0.83127800 |
| H | 1.70312600  | -4.45597900 | 0.60680900  |
| H | 1.12032100  | -5.11781000 | -0.93842800 |
| C | -1.18543600 | -3.61016900 | -1.27222700 |

|                                              |             |             |                             |
|----------------------------------------------|-------------|-------------|-----------------------------|
| H                                            | -0.81217500 | -3.67499900 | -2.29841600                 |
| H                                            | -0.99503200 | -4.57009300 | -0.79127900                 |
| C                                            | -2.67892700 | -3.29901500 | -1.27020500                 |
| H                                            | -2.92376600 | -2.42380200 | -1.87407000                 |
| H                                            | -3.19981500 | -4.16168700 | -1.69940500                 |
| H                                            | -3.07799400 | -3.13308900 | -0.26622500                 |
| C                                            | -0.60818800 | -2.48642100 | 0.91653600                  |
| H                                            | -1.47210400 | -1.82397000 | 0.99917600                  |
| H                                            | 0.25286200  | -1.96574500 | 1.33678700                  |
| C                                            | -0.89910700 | -3.78244200 | 1.67118200                  |
| H                                            | -0.07783100 | -4.50133200 | 1.65500400                  |
| H                                            | -1.07078500 | -3.50655200 | 2.71741900                  |
| H                                            | -1.80687500 | -4.28137400 | 1.32153500                  |
| C                                            | -4.51969300 | -0.21948700 | 0.05297000                  |
| C                                            | -3.54587400 | 0.54944500  | -0.57251600                 |
| C                                            | -2.86450500 | 1.61051900  | 0.10638300                  |
| C                                            | -3.27813700 | 1.84578000  | 1.45370200                  |
| C                                            | -4.25722700 | 1.06278800  | 2.06318100                  |
| C                                            | -4.88527000 | 0.01320700  | 1.38723900                  |
| H                                            | -5.02943700 | -0.99550900 | -0.51818500                 |
| H                                            | -3.31462400 | 0.39976800  | -1.62513700                 |
| H                                            | -2.82175200 | 2.65060800  | 2.02167600                  |
| H                                            | -4.53599500 | 1.28124100  | 3.09346500                  |
| H                                            | -5.65673200 | -0.58158600 | 1.86871800                  |
| N                                            | -1.89453000 | 2.29610000  | -0.55263800                 |
| H                                            | -1.01768100 | 1.56878800  | -1.33226500                 |
| C                                            | -1.34934200 | 3.46737000  | 0.08999700                  |
| H                                            | -0.82994500 | 3.26608300  | 1.05116000                  |
| H                                            | -2.14859400 | 4.19361900  | 0.33496700                  |
| C                                            | -0.35824400 | 4.16827600  | -0.81294900                 |
| C                                            | 0.64112500  | 5.10248100  | -0.27696100                 |
| H                                            | -0.69249600 | 4.30066400  | -1.84283100                 |
| H                                            | 0.69331700  | 5.27511800  | 0.79949100                  |
| H                                            | 1.00806000  | 5.92587600  | -0.89137500                 |
| O                                            | 1.03092400  | 3.79255300  | -0.70801400                 |
| Zero-point correction=                       |             |             | 0.579483 (Hartree/Particle) |
| Thermal correction to Energy=                |             |             | 0.609474                    |
| Thermal correction to Enthalpy=              |             |             | 0.610418                    |
| Thermal correction to Gibbs Free Energy=     |             |             | 0.516017                    |
| Sum of electronic and zero-point Energies=   |             |             | -1250.804247                |
| Sum of electronic and thermal Energies=      |             |             | -1250.774255                |
| Sum of electronic and thermal Enthalpies=    |             |             | -1250.773311                |
| Sum of electronic and thermal Free Energies= |             |             | -1250.867712                |
| M06-2X/6-311++G(d,p)/SMD//B3LYP/6-31G(d,p)   |             |             | energy= -1251.25824398      |

#### INT4

|   |             |             |             |
|---|-------------|-------------|-------------|
| C | -0.59893800 | -0.14301700 | -1.04208700 |
| C | -0.82539400 | -0.65141900 | 0.40227700  |
| H | -0.62628500 | -1.72876200 | 0.38394800  |
| H | -0.09812700 | -0.20583500 | 1.08609000  |
| N | -2.17153300 | -0.35778600 | 0.92131200  |
| C | -3.26658300 | -1.18637800 | 0.57291600  |
| C | -3.18849800 | -2.18268100 | -0.41405400 |
| C | -4.49747200 | -0.97085400 | 1.22058400  |
| C | -4.32280800 | -2.93033900 | -0.73995700 |
| H | -2.24776200 | -2.40163100 | -0.90724600 |
| C | -5.61640600 | -1.73043400 | 0.89447800  |

|   |             |             |             |
|---|-------------|-------------|-------------|
| H | -4.56612600 | -0.19995700 | 1.98644400  |
| C | -5.54012500 | -2.71405600 | -0.09589600 |
| H | -4.24015500 | -3.70126500 | -1.50173600 |
| H | -6.55366300 | -1.55064600 | 1.41537700  |
| H | -6.41437800 | -3.30446800 | -0.35439400 |
| C | -0.16797500 | 1.33990300  | -1.24768500 |
| O | 0.42758800  | -0.84680700 | -1.68091100 |
| H | -2.15732300 | -0.19226100 | 1.92212300  |
| H | -1.51952400 | -0.32353900 | -1.61146800 |
| H | -0.07922800 | 1.47209400  | -2.32842500 |
| H | 0.81593300  | 1.47521300  | -0.79810000 |
| N | -1.02549000 | 2.53825300  | -0.76202300 |
| C | -2.47784000 | 2.22990000  | -1.12816500 |
| H | -2.44516900 | 1.94682200  | -2.18418000 |
| H | -2.73600800 | 1.34649000  | -0.54290400 |
| C | -3.52039300 | 3.32267900  | -0.91486600 |
| H | -4.46481400 | 2.93887100  | -1.31560300 |
| H | -3.69004700 | 3.54407500  | 0.14097200  |
| H | -3.30094800 | 4.25448200  | -1.44367900 |
| C | -0.57132200 | 3.77504300  | -1.52304800 |
| H | -0.87475500 | 3.60812300  | -2.56074600 |
| H | -1.15562500 | 4.61095700  | -1.13842700 |
| C | 0.91903800  | 4.08832500  | -1.44844300 |
| H | 1.52787400  | 3.34725000  | -1.96942900 |
| H | 1.07914300  | 5.05677200  | -1.93469600 |
| H | 1.28750100  | 4.16051800  | -0.42242600 |
| C | -0.82740800 | 2.69337200  | 0.75370900  |
| H | 0.21239700  | 2.42690000  | 0.95293000  |
| H | -1.46345500 | 1.92364700  | 1.19108100  |
| C | -1.11748100 | 4.06128300  | 1.36695800  |
| H | -2.14030500 | 4.40985000  | 1.21287800  |
| H | -0.96249500 | 3.95939800  | 2.44640600  |
| H | -0.42697200 | 4.83477600  | 1.02050700  |
| C | 3.24310800  | 2.38022700  | 0.81717000  |
| C | 3.00550500  | 1.17661200  | 0.16546100  |
| C | 2.63616000  | -0.01745000 | 0.87224500  |
| C | 2.55956900  | 0.12271200  | 2.29766700  |
| C | 2.78435300  | 1.34509600  | 2.92994100  |
| C | 3.11544500  | 2.49739700  | 2.21101200  |
| H | 3.56421200  | 3.24179600  | 0.23157700  |
| H | 3.15218800  | 1.09660400  | -0.90873800 |
| H | 2.33215100  | -0.74311900 | 2.91082900  |
| H | 2.70973200  | 1.39284800  | 4.01606400  |
| H | 3.31707400  | 3.43755300  | 2.71730300  |
| N | 2.37162400  | -1.14770500 | 0.16621400  |
| H | 1.21633200  | -0.96304300 | -1.02260900 |
| C | 2.17543800  | -2.35044600 | 0.94941600  |
| H | 1.37926900  | -2.26524700 | 1.71761400  |
| H | 3.09285800  | -2.62301700 | 1.50775800  |
| C | 1.80578500  | -3.53132500 | 0.08018300  |
| C | 1.10789000  | -4.69840600 | 0.63592900  |
| H | 2.43628500  | -3.68314400 | -0.79516600 |
| H | 0.82667700  | -4.70511800 | 1.69050500  |
| H | 1.25157000  | -5.68534700 | 0.19399400  |
| O | 0.40184300  | -3.75597800 | -0.18161600 |
| C | 4.52103100  | -1.63403100 | -1.70068400 |
| O | 4.30860300  | -0.68409000 | -2.35023100 |

|                                              |            |             |                             |
|----------------------------------------------|------------|-------------|-----------------------------|
| O                                            | 4.82842800 | -2.61165700 | -1.13390600                 |
| Zero-point correction=                       |            |             | 0.596173 (Hartree/Particle) |
| Thermal correction to Energy=                |            |             | 0.630768                    |
| Thermal correction to Enthalpy=              |            |             | 0.631712                    |
| Thermal correction to Gibbs Free Energy=     |            |             | 0.525206                    |
| Sum of electronic and zero-point Energies=   |            |             | -1439.376854                |
| Sum of electronic and thermal Energies=      |            |             | -1439.342259                |
| Sum of electronic and thermal Enthalpies=    |            |             | -1439.341315                |
| Sum of electronic and thermal Free Energies= |            |             | -1439.447821                |
| M06-2X/6-311++G(d,p)/SMD//B3LYP/6-31G(d,p)   |            |             | energy= -1439.84352089      |

**TS3**

|   |             |             |             |
|---|-------------|-------------|-------------|
| C | -0.59099000 | -0.14860400 | -1.03235400 |
| C | -0.74211000 | -0.64830200 | 0.42397000  |
| H | -0.52197100 | -1.72199900 | 0.40714400  |
| H | 0.00571800  | -0.18097100 | 1.07074200  |
| N | -2.06913700 | -0.37064900 | 0.99535500  |
| C | -3.16401000 | -1.22021900 | 0.69207800  |
| C | -3.09980200 | -2.23600300 | -0.27538900 |
| C | -4.37889800 | -1.00433800 | 1.36853000  |
| C | -4.23396000 | -3.00273000 | -0.55528000 |
| H | -2.16989100 | -2.45704800 | -0.78811000 |
| C | -5.49706900 | -1.78348200 | 1.08907500  |
| H | -4.43574800 | -0.21790600 | 2.11932600  |
| C | -5.43565700 | -2.78641100 | 0.11719600  |
| H | -4.16276200 | -3.78854600 | -1.30276500 |
| H | -6.42199900 | -1.60368700 | 1.63143800  |
| H | -6.30953000 | -3.39183700 | -0.10519300 |
| C | -0.19103800 | 1.33676500  | -1.26631400 |
| O | 0.41687700  | -0.84151000 | -1.71512800 |
| H | -2.01646100 | -0.20491400 | 1.99499100  |
| H | -1.52919400 | -0.35309500 | -1.56150100 |
| H | -0.11140000 | 1.45094600  | -2.34943100 |
| H | 0.79267800  | 1.49781700  | -0.82650600 |
| N | -1.06955100 | 2.52306800  | -0.79494900 |
| C | -2.51650000 | 2.17801400  | -1.15239500 |
| H | -2.47713300 | 1.86020400  | -2.19818700 |
| H | -2.76079100 | 1.30973600  | -0.53932800 |
| C | -3.57884100 | 3.25864500  | -0.98021900 |
| H | -4.51574200 | 2.84092900  | -1.36430600 |
| H | -3.75288100 | 3.52015800  | 0.06541900  |
| H | -3.37716100 | 4.17124800  | -1.54776100 |
| C | -0.63803200 | 3.75561200  | -1.57730200 |
| H | -0.93769300 | 3.56569800  | -2.61202700 |
| H | -1.23664200 | 4.58775400  | -1.20663800 |
| C | 0.84721700  | 4.09701200  | -1.50930400 |
| H | 1.47184400  | 3.35483200  | -2.00998400 |
| H | 0.99042000  | 5.05386500  | -2.02262800 |
| H | 1.21006200  | 4.21051500  | -0.48449600 |
| C | -0.87189300 | 2.70557300  | 0.71688700  |
| H | 0.17755900  | 2.47652200  | 0.91298100  |
| H | -1.47865500 | 1.91900200  | 1.16660400  |
| C | -1.20449100 | 4.07077300  | 1.31389600  |
| H | -2.24142000 | 4.37899500  | 1.16950000  |
| H | -1.03282200 | 3.99057500  | 2.39272500  |
| H | -0.54872200 | 4.86512300  | 0.94738800  |
| C | 3.09720700  | 2.36642900  | 1.14009800  |

|                                              |            |             |                             |
|----------------------------------------------|------------|-------------|-----------------------------|
| C                                            | 2.95839800 | 1.25254900  | 0.31808000                  |
| C                                            | 2.74585900 | -0.05652000 | 0.85029400                  |
| C                                            | 2.71399700 | -0.14251600 | 2.27270500                  |
| C                                            | 2.83354700 | 0.98923400  | 3.08069500                  |
| C                                            | 3.01517400 | 2.26066900  | 2.53550400                  |
| H                                            | 3.30205800 | 3.33446600  | 0.68331300                  |
| H                                            | 3.07471500 | 1.34664100  | -0.75587000                 |
| H                                            | 2.61241000 | -1.10716400 | 2.75656800                  |
| H                                            | 2.79875600 | 0.86488600  | 4.16189100                  |
| H                                            | 3.12966000 | 3.13331400  | 3.17282400                  |
| N                                            | 2.55816100 | -1.11845100 | -0.01453100                 |
| H                                            | 1.23940800 | -0.90862800 | -1.11928100                 |
| C                                            | 2.45497200 | -2.43478500 | 0.60418100                  |
| H                                            | 1.77902300 | -2.42974300 | 1.47361800                  |
| H                                            | 3.43848000 | -2.78118500 | 0.96386300                  |
| C                                            | 1.90820000 | -3.47820800 | -0.34624900                 |
| C                                            | 1.32350600 | -4.72218100 | 0.17198900                  |
| H                                            | 2.34930900 | -3.49758600 | -1.34019400                 |
| H                                            | 1.26368500 | -4.88140200 | 1.25021600                  |
| H                                            | 1.36347200 | -5.63458700 | -0.42402700                 |
| O                                            | 0.47662000 | -3.68714100 | -0.34400000                 |
| C                                            | 4.00771000 | -1.21976900 | -1.50498600                 |
| O                                            | 3.86264200 | -0.23055400 | -2.15973500                 |
| O                                            | 4.55987100 | -2.25754000 | -1.28810500                 |
| Zero-point correction=                       |            |             | 0.597680 (Hartree/Particle) |
| Thermal correction to Energy=                |            |             | 0.630876                    |
| Thermal correction to Enthalpy=              |            |             | 0.631820                    |
| Thermal correction to Gibbs Free Energy=     |            |             | 0.530210                    |
| Sum of electronic and zero-point Energies=   |            |             | -1439.372314                |
| Sum of electronic and thermal Energies=      |            |             | -1439.339118                |
| Sum of electronic and thermal Enthalpies=    |            |             | -1439.338174                |
| Sum of electronic and thermal Free Energies= |            |             | -1439.439784                |
| M06-2X/6-311++G(d,p)/SMD//B3LYP/6-31G(d,p)   |            |             | energy= -1439.84480722      |

## INT5

|   |             |             |             |
|---|-------------|-------------|-------------|
| C | -1.22250600 | -0.18125600 | 1.29444800  |
| C | -0.45941100 | 0.77887400  | 0.34205400  |
| H | 0.08096100  | 1.50231800  | 0.96812200  |
| H | 0.27978000  | 0.23497300  | -0.25146800 |
| N | -1.34670100 | 1.46099300  | -0.59885500 |
| C | -2.08853200 | 2.58899200  | -0.20716000 |
| C | -2.28667700 | 2.93502100  | 1.14154800  |
| C | -2.68991500 | 3.38493700  | -1.20131300 |
| C | -3.07207100 | 4.04218200  | 1.47129000  |
| H | -1.82567400 | 2.35468300  | 1.93411700  |
| C | -3.46265000 | 4.48867800  | -0.85836500 |
| H | -2.54140200 | 3.12767100  | -2.24843400 |
| C | -3.66546300 | 4.82625300  | 0.48347700  |
| H | -3.20985300 | 4.29349900  | 2.52008800  |
| H | -3.90899000 | 5.09068600  | -1.64605900 |
| H | -4.27077800 | 5.68767100  | 0.75021200  |
| C | -1.20063900 | -1.69479100 | 0.93714100  |
| O | -0.70973600 | -0.11456400 | 2.61916000  |
| H | -0.91397500 | 1.58264100  | -1.50741700 |
| H | -2.25769100 | 0.16620700  | 1.36566700  |
| H | -1.50161000 | -2.21591900 | 1.84907400  |
| H | -0.19218500 | -2.02191000 | 0.66910800  |

|                                              |             |             |                             |
|----------------------------------------------|-------------|-------------|-----------------------------|
| N                                            | -2.16155700 | -2.22942300 | -0.14705600                 |
| C                                            | -3.57636900 | -1.77928700 | 0.23560400                  |
| H                                            | -3.59630000 | -1.75732900 | 1.32797300                  |
| H                                            | -3.65949000 | -0.74962600 | -0.11575000                 |
| C                                            | -4.76309600 | -2.60767200 | -0.25530800                 |
| H                                            | -5.66945900 | -2.06572200 | 0.03686500                  |
| H                                            | -4.79263700 | -2.73447300 | -1.33858300                 |
| H                                            | -4.81097700 | -3.59300100 | 0.21535700                  |
| C                                            | -2.06963700 | -3.75569400 | -0.12271500                 |
| H                                            | -2.27614900 | -4.03915000 | 0.91390800                  |
| H                                            | -2.89296300 | -4.12259600 | -0.73531100                 |
| C                                            | -0.75239200 | -4.35606600 | -0.60564200                 |
| H                                            | 0.14350000  | -3.91258600 | -0.15493200                 |
| H                                            | -0.78038200 | -5.42409100 | -0.35953800                 |
| H                                            | -0.64632100 | -4.27198400 | -1.69084700                 |
| C                                            | -1.73357800 | -1.66972300 | -1.50717800                 |
| H                                            | -0.65321200 | -1.84830300 | -1.58346300                 |
| H                                            | -1.87866000 | -0.59075900 | -1.42060300                 |
| C                                            | -2.47973000 | -2.19812100 | -2.72725600                 |
| H                                            | -3.52101000 | -1.86694200 | -2.77809900                 |
| H                                            | -1.96889100 | -1.79118700 | -3.60653400                 |
| H                                            | -2.45052800 | -3.28780700 | -2.82001300                 |
| C                                            | 3.87780100  | 1.41233200  | -2.92730000                 |
| C                                            | 3.50306200  | 0.28388200  | -2.20336200                 |
| C                                            | 3.37091300  | 0.34564800  | -0.80357200                 |
| C                                            | 3.61723500  | 1.57319300  | -0.16424300                 |
| C                                            | 4.00988400  | 2.69463900  | -0.89747200                 |
| C                                            | 4.14330700  | 2.62465900  | -2.28338400                 |
| H                                            | 3.97740400  | 1.33878500  | -4.00802000                 |
| H                                            | 3.29635400  | -0.65126100 | -2.70731600                 |
| H                                            | 3.46624900  | 1.65429400  | 0.90746800                  |
| H                                            | 4.19543800  | 3.63140300  | -0.37683900                 |
| H                                            | 4.44418800  | 3.49905500  | -2.85452400                 |
| N                                            | 3.02631500  | -0.80716900 | -0.05663100                 |
| H                                            | 0.25595600  | 0.06424700  | 2.59926600                  |
| C                                            | 3.66705400  | -1.05632400 | 1.23265200                  |
| H                                            | 4.49129200  | -0.34804100 | 1.34751500                  |
| H                                            | 4.08327600  | -2.07108700 | 1.24053700                  |
| C                                            | 2.71895100  | -0.95480400 | 2.41217000                  |
| C                                            | 3.00709800  | -0.17388600 | 3.62227100                  |
| H                                            | 2.01600600  | -1.77859900 | 2.48793000                  |
| H                                            | 3.94027100  | 0.38300100  | 3.69974300                  |
| H                                            | 2.55143700  | -0.45063400 | 4.57248400                  |
| O                                            | 2.09587200  | 0.34106200  | 2.62976300                  |
| C                                            | 1.98536500  | -1.71345700 | -0.45819200                 |
| O                                            | 1.33235400  | -1.42289700 | -1.49354800                 |
| O                                            | 1.79433400  | -2.68087500 | 0.33399400                  |
| Zero-point correction=                       |             |             | 0.602278 (Hartree/Particle) |
| Thermal correction to Energy=                |             |             | 0.634759                    |
| Thermal correction to Enthalpy=              |             |             | 0.635703                    |
| Thermal correction to Gibbs Free Energy=     |             |             | 0.537241                    |
| Sum of electronic and zero-point Energies=   |             |             | -1439.411159                |
| Sum of electronic and thermal Energies=      |             |             | -1439.378678                |
| Sum of electronic and thermal Enthalpies=    |             |             | -1439.377733                |
| Sum of electronic and thermal Free Energies= |             |             | -1439.476196                |
| M06-2X/6-311++G(d,p)/SMD//B3LYP/6-31G(d,p)   |             |             | energy= -1439.87470946      |

TS4

|   |             |             |             |
|---|-------------|-------------|-------------|
| C | -1.59656400 | 1.80427500  | 0.50775900  |
| C | -1.77856500 | 1.31379400  | -0.94545000 |
| H | -2.35994200 | 2.09675700  | -1.45097300 |
| H | -0.80406300 | 1.29371500  | -1.43934700 |
| N | -2.40547600 | -0.00124200 | -1.08989300 |
| C | -3.80834000 | -0.15381800 | -1.07120600 |
| C | -4.68184400 | 0.85432000  | -0.63118000 |
| C | -4.35406700 | -1.38790400 | -1.47401000 |
| C | -6.05937300 | 0.62301200  | -0.59584300 |
| H | -4.30075200 | 1.82514800  | -0.33422200 |
| C | -5.72740500 | -1.60337900 | -1.44038300 |
| H | -3.68750600 | -2.17684800 | -1.81769900 |
| C | -6.59393800 | -0.59999700 | -0.99601500 |
| H | -6.71694100 | 1.41969700  | -0.25771700 |
| H | -6.12331900 | -2.56227500 | -1.76480500 |
| H | -7.66604200 | -0.76991000 | -0.96845100 |
| C | -0.48902000 | 1.15986600  | 1.39901100  |
| O | -1.25180400 | 3.16805000  | 0.50004600  |
| H | -1.98878300 | -0.54266700 | -1.83864300 |
| H | -2.55754100 | 1.72659700  | 1.02781400  |
| H | -0.46036800 | 1.78877400  | 2.29086400  |
| H | 0.46485700  | 1.24983500  | 0.88798800  |
| N | -0.53983400 | -0.29001800 | 1.92551800  |
| C | -1.98782500 | -0.60123700 | 2.30849600  |
| H | -2.37546900 | 0.32391500  | 2.74259300  |
| H | -2.50749600 | -0.76844000 | 1.36406400  |
| C | -2.24044600 | -1.74182400 | 3.29251500  |
| H | -3.32734600 | -1.84516800 | 3.38101600  |
| H | -1.84659900 | -2.70350200 | 2.96258600  |
| H | -1.85430200 | -1.52927400 | 4.29274900  |
| C | 0.34632800  | -0.35801600 | 3.17146500  |
| H | -0.16611700 | 0.25325700  | 3.92072400  |
| H | 0.31584200  | -1.39344400 | 3.51080900  |
| C | 1.79073900  | 0.10178600  | 3.00305100  |
| H | 1.87753100  | 1.16093900  | 2.75145400  |
| H | 2.28638400  | -0.03841300 | 3.96970600  |
| H | 2.36408100  | -0.46815800 | 2.26889000  |
| C | -0.00643100 | -1.20714600 | 0.81837100  |
| H | 0.97675100  | -0.81186000 | 0.56345200  |
| H | -0.68022600 | -1.03525300 | -0.02058200 |
| C | 0.09962900  | -2.69807100 | 1.11241600  |
| H | -0.87392000 | -3.19014700 | 1.17850400  |
| H | 0.64146500  | -3.14128700 | 0.27039700  |
| H | 0.68037700  | -2.92535400 | 2.01103000  |
| C | 3.56368400  | -3.37830600 | -0.63733400 |
| C | 3.65557700  | -2.04240000 | -0.25648500 |
| C | 3.08942400  | -1.02342600 | -1.06055300 |
| C | 2.46183900  | -1.41929500 | -2.26465400 |
| C | 2.37277800  | -2.76521000 | -2.62423800 |
| C | 2.91206300  | -3.76249400 | -1.81355000 |
| H | 4.01812500  | -4.13313000 | 0.00090800  |
| H | 4.18748500  | -1.75017700 | 0.63789100  |
| H | 2.06650500  | -0.67845600 | -2.94969300 |
| H | 1.88825900  | -3.02612500 | -3.56261500 |
| H | 2.84888900  | -4.80840600 | -2.10084400 |
| N | 3.10487600  | 0.32585800  | -0.67099100 |

|                                              |             |            |                             |
|----------------------------------------------|-------------|------------|-----------------------------|
| H                                            | -0.50698600 | 3.31078100 | -0.16696100                 |
| C                                            | 2.42676400  | 1.32628000 | -1.48274600                 |
| H                                            | 1.47264000  | 0.92701000 | -1.83280000                 |
| H                                            | 3.01122200  | 1.61362200 | -2.37107500                 |
| C                                            | 2.18046800  | 2.54725400 | -0.63324500                 |
| C                                            | 1.95495200  | 3.86710100 | -1.20628900                 |
| H                                            | 1.85033600  | 2.42829600 | 0.38468300                  |
| H                                            | 2.45902800  | 4.08443100 | -2.15698500                 |
| H                                            | 2.02733400  | 4.72442100 | -0.52509600                 |
| O                                            | 0.67823000  | 3.27929100 | -1.33952600                 |
| C                                            | 4.03583900  | 0.93709500 | 0.28449300                  |
| O                                            | 4.65655400  | 0.22808400 | 1.08083000                  |
| O                                            | 4.02352700  | 2.20899300 | 0.18384700                  |
| Zero-point correction=                       |             |            | 0.599686 (Hartree/Particle) |
| Thermal correction to Energy=                |             |            | 0.632286                    |
| Thermal correction to Enthalpy=              |             |            | 0.633230                    |
| Thermal correction to Gibbs Free Energy=     |             |            | 0.532137                    |
| Sum of electronic and zero-point Energies=   |             |            | -1439.368512                |
| Sum of electronic and thermal Energies=      |             |            | -1439.335912                |
| Sum of electronic and thermal Enthalpies=    |             |            | -1439.334968                |
| Sum of electronic and thermal Free Energies= |             |            | -1439.436062                |
| M06-2X/6-311++G(d,p)/SMD//B3LYP/6-31G(d,p)   |             |            | energy= -1439.83952351      |

## 2a

|                                              |             |             |                             |
|----------------------------------------------|-------------|-------------|-----------------------------|
| C                                            | 3.63323500  | 0.57811300  | -0.00524400                 |
| C                                            | 2.28935700  | 0.93649300  | 0.06548200                  |
| C                                            | 1.30038100  | -0.06310200 | 0.05503400                  |
| C                                            | 1.69121900  | -1.40984900 | -0.02313700                 |
| C                                            | 3.04265600  | -1.74936000 | -0.09039600                 |
| C                                            | 4.02369300  | -0.76027000 | -0.08252600                 |
| H                                            | 4.38421400  | 1.36365200  | 0.00310000                  |
| H                                            | 1.99817000  | 1.97580300  | 0.11885200                  |
| H                                            | 0.95018000  | -2.20144300 | -0.03447500                 |
| H                                            | 3.32145300  | -2.79803500 | -0.15046600                 |
| H                                            | 5.07537300  | -1.02640500 | -0.13527300                 |
| N                                            | -0.07811600 | 0.24966100  | 0.14479200                  |
| H                                            | -3.47331000 | -2.32309100 | -0.49271500                 |
| C                                            | -1.10789700 | -0.77560300 | 0.21878100                  |
| H                                            | -0.92387300 | -1.47066200 | 1.04307400                  |
| H                                            | -1.15231400 | -1.35648900 | -0.71685300                 |
| C                                            | -2.37915500 | 0.06308700  | 0.44065800                  |
| C                                            | -3.58349200 | -0.37287400 | -0.39072300                 |
| H                                            | -2.65560300 | 0.07116700  | 1.50126500                  |
| H                                            | -3.33446700 | -0.30584000 | -1.45988800                 |
| H                                            | -4.41947000 | 0.30589600  | -0.19992800                 |
| O                                            | -4.01121400 | -1.67497000 | -0.01420200                 |
| C                                            | -0.64093800 | 1.50800000  | -0.02892500                 |
| O                                            | -0.09132100 | 2.56328200  | -0.22999400                 |
| O                                            | -2.00220100 | 1.39794000  | 0.06366300                  |
| Zero-point correction=                       |             |             | 0.201623 (Hartree/Particle) |
| Thermal correction to Energy=                |             |             | 0.213766                    |
| Thermal correction to Enthalpy=              |             |             | 0.214710                    |
| Thermal correction to Gibbs Free Energy=     |             |             | 0.161801                    |
| Sum of electronic and zero-point Energies=   |             |             | -667.910473                 |
| Sum of electronic and thermal Energies=      |             |             | -667.898330                 |
| Sum of electronic and thermal Enthalpies=    |             |             | -667.897386                 |
| Sum of electronic and thermal Free Energies= |             |             | -667.950295                 |



## INT2'

|   |             |             |             |
|---|-------------|-------------|-------------|
| C | 0.23207500  | 1.21216100  | 1.86757000  |
| C | 0.05895000  | 0.95158100  | 0.37782000  |
| H | 0.65509300  | 1.68818400  | -0.17194000 |
| H | 0.47555200  | -0.03303200 | 0.13940500  |
| N | -1.31638700 | 0.98510300  | -0.06901300 |
| C | -2.04721500 | 2.14993000  | -0.23966000 |
| C | -1.46429000 | 3.43307900  | -0.17565000 |
| C | -3.42872000 | 2.06461400  | -0.51988600 |
| C | -2.23983000 | 4.57200500  | -0.39368900 |
| H | -0.40621500 | 3.54661800  | 0.03869900  |
| C | -4.18719500 | 3.21004900  | -0.73184000 |
| H | -3.89637500 | 1.08442200  | -0.57563800 |
| C | -3.60339900 | 4.47911300  | -0.67199700 |
| H | -1.76239200 | 5.54776400  | -0.33916800 |
| H | -5.24868800 | 3.10884400  | -0.94662600 |
| H | -4.19906800 | 5.37218600  | -0.83648600 |
| C | 0.41952300  | 0.12098900  | 2.83268900  |
| O | 1.53742100  | 0.92491700  | 2.41210400  |
| H | -1.83341500 | 0.10703000  | -0.00945700 |
| H | -0.19412600 | 2.14664600  | 2.23300700  |
| H | 0.13026700  | 0.25253700  | 3.87499900  |
| H | 0.43652700  | -0.91033200 | 2.47959800  |
| N | -2.56245200 | -1.95067200 | 0.01234600  |
| C | -2.78875400 | -2.13532500 | 1.45192500  |
| H | -1.87259300 | -1.80152400 | 1.95824700  |
| H | -3.57590700 | -1.43124400 | 1.74960000  |
| C | -3.14136000 | -3.53818500 | 1.97898700  |
| H | -3.16663600 | -3.51943400 | 3.07537900  |
| H | -4.12242100 | -3.87840800 | 1.63414700  |
| H | -2.39802100 | -4.28497100 | 1.67973100  |
| C | -1.42699700 | -2.72403500 | -0.51090100 |
| H | -0.60358500 | -2.60557000 | 0.20482500  |
| H | -1.64003200 | -3.80629400 | -0.55305800 |
| C | -0.95068200 | -2.25347000 | -1.88711500 |
| H | -0.78369700 | -1.17127600 | -1.89371600 |
| H | -0.00634800 | -2.74939300 | -2.13531200 |
| H | -1.66976600 | -2.49058300 | -2.67895000 |
| C | -3.76660200 | -1.95047000 | -0.83371600 |
| H | -3.53553400 | -1.37037900 | -1.73563800 |
| H | -4.53262200 | -1.37989800 | -0.29443400 |
| C | -4.35753700 | -3.30203300 | -1.27389400 |
| H | -4.71152800 | -3.90185300 | -0.43073800 |
| H | -5.21124900 | -3.12436600 | -1.93875600 |
| H | -3.62900400 | -3.90116600 | -1.83063100 |
| C | 2.75191300  | -3.39311200 | 0.53440200  |
| C | 2.94028600  | -2.05296200 | 0.85290200  |
| C | 3.41173800  | -1.13776400 | -0.11490900 |
| C | 3.69033100  | -1.62444400 | -1.40654200 |
| C | 3.50176600  | -2.97431000 | -1.71011300 |
| C | 3.02840500  | -3.87008700 | -0.75213000 |
| H | 2.39406100  | -4.07542800 | 1.30210300  |
| H | 2.74501400  | -1.69436600 | 1.86021500  |
| H | 4.05161800  | -0.95315600 | -2.17839300 |
| H | 3.72688900  | -3.32332900 | -2.71517700 |

|                                              |            |             |                             |
|----------------------------------------------|------------|-------------|-----------------------------|
| H                                            | 2.88543800 | -4.91862200 | -0.99637200                 |
| N                                            | 3.60252200 | 0.19141800  | 0.24781500                  |
| H                                            | 3.01339000 | 0.49297600  | 1.02210300                  |
| C                                            | 3.83835600 | 1.21127800  | -0.75721500                 |
| H                                            | 3.06071600 | 1.22607900  | -1.54108400                 |
| H                                            | 4.79642000 | 1.01285100  | -1.25940900                 |
| C                                            | 3.91038200 | 2.57669600  | -0.11988600                 |
| C                                            | 3.50245200 | 3.78310600  | -0.85094900                 |
| H                                            | 4.64197200 | 2.67751500  | 0.68355000                  |
| H                                            | 3.12995100 | 3.69464400  | -1.87178900                 |
| H                                            | 3.95309900 | 4.74399700  | -0.60326200                 |
| O                                            | 2.65456200 | 3.22395300  | 0.16104400                  |
| Zero-point correction=                       |            |             | 0.579664 (Hartree/Particle) |
| Thermal correction to Energy=                |            |             | 0.612595                    |
| Thermal correction to Enthalpy=              |            |             | 0.613539                    |
| Thermal correction to Gibbs Free Energy=     |            |             | 0.507391                    |
| Sum of electronic and zero-point Energies=   |            |             | -1250.857701                |
| Sum of electronic and thermal Energies=      |            |             | -1250.824769                |
| Sum of electronic and thermal Enthalpies=    |            |             | -1250.823825                |
| Sum of electronic and thermal Free Energies= |            |             | -1250.929973                |
| M06-2X/6-311++G(d,p)/SMD//B3LYP/6-31G(d,p)   |            |             | energy= -1251.26139021      |

**TS1'**

|   |             |             |             |
|---|-------------|-------------|-------------|
| O | 1.79012900  | -0.42859800 | 2.99820300  |
| C | 0.64746200  | -1.60020100 | 2.21684600  |
| C | 0.39677700  | -0.76425200 | 0.97573700  |
| H | 0.17522000  | -1.35587000 | 0.09270900  |
| H | -0.44366900 | -0.09008500 | 1.15300400  |
| C | 2.09465000  | 0.50316600  | 2.19885600  |
| O | 2.64821800  | 1.57055600  | 2.31485300  |
| N | 1.59495900  | 0.10479300  | 0.74034000  |
| C | 2.71899800  | -0.47212400 | -0.03739600 |
| C | 2.66222900  | -1.75835200 | -0.57390000 |
| C | 3.84975300  | 0.33162900  | -0.21986700 |
| C | 3.75478300  | -2.23403600 | -1.30537200 |
| H | 1.79199600  | -2.39395700 | -0.46280200 |
| C | 4.92935400  | -0.15939400 | -0.95102700 |
| H | 3.88822000  | 1.31790100  | 0.22716300  |
| C | 4.88586400  | -1.44371900 | -1.49727600 |
| H | 3.70719100  | -3.23388200 | -1.72660400 |
| H | 5.80689200  | 0.46571300  | -1.08852200 |
| H | 5.72860800  | -1.82407200 | -2.06729500 |
| C | -0.52878700 | -1.88306400 | 3.06830600  |
| O | -1.06196500 | -2.66437900 | 2.06430800  |
| H | 1.25330100  | 1.00947300  | 0.26423700  |
| H | 1.34032800  | -2.42806300 | 2.11971700  |
| H | -0.27890600 | -2.41077600 | 4.00632900  |
| H | -1.09230000 | -0.96575500 | 3.33711600  |
| N | 0.48972300  | 2.47592600  | -0.41494400 |
| C | -0.17108400 | 3.04138800  | 0.78937700  |
| H | -0.85733700 | 2.26671100  | 1.15332800  |
| H | 0.60873800  | 3.16307700  | 1.54884800  |
| C | -0.97404600 | 4.34347900  | 0.65437800  |
| H | -1.48048300 | 4.54264400  | 1.60589500  |
| H | -0.34159100 | 5.20811900  | 0.43470700  |
| H | -1.74766200 | 4.26965600  | -0.11650100 |
| C | -0.48052700 | 2.10302000  | -1.46969000 |

|                                              |             |             |                             |
|----------------------------------------------|-------------|-------------|-----------------------------|
| H                                            | -1.30663100 | 1.57997100  | -0.97598400                 |
| H                                            | -0.91883800 | 2.99590100  | -1.93996700                 |
| C                                            | 0.10690900  | 1.20120100  | -2.55582500                 |
| H                                            | 0.52978700  | 0.28028600  | -2.13986200                 |
| H                                            | -0.68866300 | 0.91388000  | -3.25135900                 |
| H                                            | 0.88878200  | 1.70107200  | -3.13756400                 |
| C                                            | 1.66369600  | 3.24369500  | -0.89954600                 |
| H                                            | 2.29739300  | 2.54563300  | -1.45900600                 |
| H                                            | 2.23323700  | 3.53007800  | -0.00857200                 |
| C                                            | 1.42505300  | 4.47598100  | -1.78576300                 |
| H                                            | 0.85073700  | 5.25786100  | -1.28369000                 |
| H                                            | 2.39589300  | 4.90270100  | -2.06378900                 |
| H                                            | 0.90549100  | 4.21904100  | -2.71482900                 |
| C                                            | -4.08934900 | 1.45596600  | 1.06960500                  |
| C                                            | -3.41340900 | 0.24134900  | 1.09001400                  |
| C                                            | -3.38251700 | -0.59706100 | -0.05455000                 |
| C                                            | -4.08302600 | -0.16069700 | -1.20286100                 |
| C                                            | -4.75112600 | 1.06424600  | -1.20510000                 |
| C                                            | -4.76009300 | 1.88980900  | -0.08021700                 |
| H                                            | -4.10239700 | 2.06744200  | 1.96942400                  |
| H                                            | -2.92258600 | -0.09849600 | 1.99900000                  |
| H                                            | -4.11567500 | -0.78448700 | -2.09034500                 |
| H                                            | -5.28144500 | 1.36957900  | -2.10467000                 |
| H                                            | -5.29122600 | 2.83702100  | -0.08947000                 |
| N                                            | -2.66672500 | -1.76474000 | -0.00752100                 |
| H                                            | -2.19652600 | -2.03289000 | 0.87749600                  |
| C                                            | -2.61116100 | -2.73604600 | -1.07431800                 |
| H                                            | -2.48046000 | -2.24149200 | -2.04720400                 |
| H                                            | -3.53726500 | -3.33745200 | -1.14250800                 |
| C                                            | -1.43695000 | -3.66564300 | -0.86451500                 |
| C                                            | -0.79922200 | -4.34658400 | -1.99688000                 |
| H                                            | -1.34983700 | -4.09815000 | 0.13104600                  |
| H                                            | -1.17375000 | -4.18355400 | -3.00820600                 |
| H                                            | -0.29020900 | -5.29775200 | -1.84128200                 |
| O                                            | -0.17081100 | -3.20525500 | -1.39226400                 |
| Zero-point correction=                       |             |             | 0.594264 (Hartree/Particle) |
| Thermal correction to Energy=                |             |             | 0.628399                    |
| Thermal correction to Enthalpy=              |             |             | 0.629343                    |
| Thermal correction to Gibbs Free Energy=     |             |             | 0.524215                    |
| Sum of electronic and zero-point Energies=   |             |             | -1439.362509                |
| Sum of electronic and thermal Energies=      |             |             | -1439.328374                |
| Sum of electronic and thermal Enthalpies=    |             |             | -1439.327430                |
| Sum of electronic and thermal Free Energies= |             |             | -1439.432558                |
| M06-2X/6-311++G(d,p)/SMD//B3LYP/6-31G(d,p)   |             |             | energy= -1439.78411793      |

### INT3'

|   |             |             |             |
|---|-------------|-------------|-------------|
| O | 1.57896300  | -0.54419200 | 2.92792500  |
| C | 0.74078600  | -1.56251100 | 2.20522600  |
| C | 0.41137700  | -0.83622700 | 0.90643200  |
| H | 0.25619600  | -1.47785500 | 0.04722800  |
| H | -0.47728200 | -0.21564800 | 1.04094300  |
| C | 1.98461200  | 0.42390400  | 2.15138700  |
| O | 2.57262900  | 1.43149500  | 2.43165400  |
| N | 1.56638700  | 0.10913000  | 0.71128600  |
| C | 2.74157100  | -0.37540800 | -0.06739300 |
| C | 2.74409200  | -1.62472100 | -0.68730200 |
| C | 3.84228800  | 0.48174800  | -0.16736800 |

|   |             |             |             |
|---|-------------|-------------|-------------|
| C | 3.87194200  | -2.00827300 | -1.41953300 |
| H | 1.89779300  | -2.30013700 | -0.63808200 |
| C | 4.95787800  | 0.08023600  | -0.89945800 |
| H | 3.83378400  | 1.43930100  | 0.33954100  |
| C | 4.97629500  | -1.16584700 | -1.52879800 |
| H | 3.87349000  | -2.97905800 | -1.90604900 |
| H | 5.81330200  | 0.74531900  | -0.97284800 |
| H | 5.84643300  | -1.47659500 | -2.09966000 |
| C | -0.54388300 | -1.96289200 | 2.95137200  |
| O | -1.26294500 | -2.71285600 | 2.08669100  |
| H | 1.17420400  | 1.05191100  | 0.25765800  |
| H | 1.39315900  | -2.42568800 | 2.05609000  |
| H | -0.24913200 | -2.47969500 | 3.89381400  |
| H | -1.01646900 | -0.99927800 | 3.28363100  |
| N | 0.43988400  | 2.41313500  | -0.32227400 |
| C | -0.17459900 | 2.97285600  | 0.91591300  |
| H | -0.76854600 | 2.16147600  | 1.35397800  |
| H | 0.64800600  | 3.18050600  | 1.60830900  |
| C | -1.08684900 | 4.20051100  | 0.80106900  |
| H | -1.50569100 | 4.41152200  | 1.79164800  |
| H | -0.55445900 | 5.09778700  | 0.47455800  |
| H | -1.92855100 | 4.02162300  | 0.12559500  |
| C | -0.58559000 | 2.01865400  | -1.32394400 |
| H | -1.36895500 | 1.47677900  | -0.78545900 |
| H | -1.06588200 | 2.90784500  | -1.75368900 |
| C | -0.04370800 | 1.14046400  | -2.45117000 |
| H | 0.42384500  | 0.22454500  | -2.07429100 |
| H | -0.87771400 | 0.83964700  | -3.09321900 |
| H | 0.68635800  | 1.66346800  | -3.07815100 |
| C | 1.56010100  | 3.21876000  | -0.87963600 |
| H | 2.17136300  | 2.53940600  | -1.48364600 |
| H | 2.17920000  | 3.51766400  | -0.02632600 |
| C | 1.22916100  | 4.44986500  | -1.73499400 |
| H | 0.69038700  | 5.22104100  | -1.18027200 |
| H | 2.16799400  | 4.89091700  | -2.08939600 |
| H | 0.63740600  | 4.19093700  | -2.61891500 |
| C | -4.02002400 | 1.47058200  | 0.96345800  |
| C | -3.38839400 | 0.23432900  | 1.03006400  |
| C | -3.32105200 | -0.61787500 | -0.10734500 |
| C | -3.94267700 | -0.16225700 | -1.29669400 |
| C | -4.56412100 | 1.08591800  | -1.34360600 |
| C | -4.60748000 | 1.92177700  | -0.22605300 |
| H | -4.06701700 | 2.08704900  | 1.85914400  |
| H | -2.96604600 | -0.12091000 | 1.96716300  |
| H | -3.95482200 | -0.79358700 | -2.17956200 |
| H | -5.03410500 | 1.40153000  | -2.27308400 |
| H | -5.10833900 | 2.88461000  | -0.26954600 |
| N | -2.64941200 | -1.80057100 | -0.00230300 |
| H | -2.20752500 | -2.07158800 | 0.92201000  |
| C | -2.53021200 | -2.77948600 | -1.05655100 |
| H | -2.40965000 | -2.29733800 | -2.03709000 |
| H | -3.42279600 | -3.42949500 | -1.12761200 |
| C | -1.31226300 | -3.64573800 | -0.81298300 |
| C | -0.66646600 | -4.37102600 | -1.91148400 |
| H | -1.17891200 | -3.98208400 | 0.21490300  |
| H | -1.06876900 | -4.29583400 | -2.92279400 |
| H | -0.10940400 | -5.28522500 | -1.70581700 |

|                                              |             |             |                             |
|----------------------------------------------|-------------|-------------|-----------------------------|
| O                                            | -0.07459500 | -3.16204500 | -1.40768500                 |
| Zero-point correction=                       |             |             | 0.594609 (Hartree/Particle) |
| Thermal correction to Energy=                |             |             | 0.628502                    |
| Thermal correction to Enthalpy=              |             |             | 0.629446                    |
| Thermal correction to Gibbs Free Energy=     |             |             | 0.525436                    |
| Sum of electronic and zero-point Energies=   |             |             | -1439.368894                |
| Sum of electronic and thermal Energies=      |             |             | -1439.335002                |
| Sum of electronic and thermal Enthalpies=    |             |             | -1439.334058                |
| Sum of electronic and thermal Free Energies= |             |             | -1439.438068                |
| M06-2X/6-311++G(d,p)/SMD//B3LYP/6-31G(d,p)   |             |             | energy= -1439.80784425      |

**TS2'**

|   |             |             |             |
|---|-------------|-------------|-------------|
| O | 1.53799700  | -0.49414500 | 2.93511400  |
| C | 0.68858700  | -1.51342100 | 2.23556300  |
| C | 0.39046600  | -0.81737100 | 0.91368500  |
| H | 0.22337400  | -1.48141200 | 0.07457600  |
| H | -0.48900300 | -0.17853000 | 1.02403300  |
| C | 1.98451600  | 0.43051300  | 2.12292100  |
| O | 2.60644700  | 1.42465100  | 2.38762400  |
| N | 1.56599600  | 0.09576300  | 0.70203100  |
| C | 2.72460600  | -0.43264300 | -0.06719200 |
| C | 2.67322000  | -1.66943800 | -0.71251700 |
| C | 3.87185300  | 0.36556700  | -0.14554700 |
| C | 3.78499100  | -2.09682300 | -1.44493400 |
| H | 1.79797000  | -2.30742600 | -0.67673800 |
| C | 4.97165900  | -0.07938900 | -0.87657400 |
| H | 3.91145300  | 1.31171000  | 0.38016900  |
| C | 4.93238300  | -1.31153800 | -1.53134900 |
| H | 3.74012100  | -3.05822200 | -1.94800500 |
| H | 5.86100300  | 0.54200000  | -0.92885700 |
| H | 5.79016500  | -1.65583700 | -2.10171900 |
| C | -0.61284800 | -1.86118100 | 2.98005400  |
| O | -1.35119700 | -2.61628000 | 2.13571900  |
| H | 1.16180100  | 1.09948900  | 0.20386100  |
| H | 1.32209100  | -2.39564400 | 2.11656400  |
| H | -0.33916300 | -2.35791100 | 3.93959300  |
| H | -1.06065100 | -0.87527900 | 3.28169900  |
| N | 0.54410500  | 2.34348700  | -0.32991700 |
| C | -0.05020700 | 2.96182700  | 0.89812000  |
| H | -0.59681000 | 2.15920600  | 1.40712700  |
| H | 0.78869600  | 3.23786100  | 1.54367500  |
| C | -1.01364800 | 4.14139200  | 0.73208600  |
| H | -1.35318800 | 4.44350300  | 1.72925900  |
| H | -0.54897000 | 5.01369500  | 0.26623100  |
| H | -1.90318400 | 3.86422700  | 0.15928300  |
| C | -0.50431100 | 1.96918000  | -1.32329100 |
| H | -1.29592100 | 1.45519000  | -0.77045500 |
| H | -0.95827600 | 2.87359800  | -1.74591600 |
| C | -0.00256700 | 1.07202600  | -2.45356900 |
| H | 0.45789700  | 0.15049200  | -2.08266000 |
| H | -0.85980100 | 0.78156700  | -3.06908000 |
| H | 0.71796100  | 1.57799400  | -3.10485400 |
| C | 1.69624100  | 3.09606900  | -0.90800800 |
| H | 2.23557700  | 2.39324100  | -1.55008200 |
| H | 2.36168300  | 3.32526000  | -0.06893900 |
| C | 1.41222600  | 4.37105100  | -1.70991100 |
| H | 0.99451800  | 5.17322400  | -1.09750400 |

|                                              |             |             |                             |
|----------------------------------------------|-------------|-------------|-----------------------------|
| H                                            | 2.35785300  | 4.73476100  | -2.12779800                 |
| H                                            | 0.73336000  | 4.19096800  | -2.54951100                 |
| C                                            | -3.97676700 | 1.61142500  | 0.90834200                  |
| C                                            | -3.38595300 | 0.35735800  | 1.00658400                  |
| C                                            | -3.34282100 | -0.52421800 | -0.11007700                 |
| C                                            | -3.94405300 | -0.07503000 | -1.31311500                 |
| C                                            | -4.52289200 | 1.19165900  | -1.39216400                 |
| C                                            | -4.54383900 | 2.05463500  | -0.29439300                 |
| H                                            | -4.00870900 | 2.24891900  | 1.78991500                  |
| H                                            | -2.97978900 | 0.01007500  | 1.95366600                  |
| H                                            | -3.97527800 | -0.72614800 | -2.18098000                 |
| H                                            | -4.97871900 | 1.50049800  | -2.33096000                 |
| H                                            | -5.01499900 | 3.03100300  | -0.36198900                 |
| N                                            | -2.71329100 | -1.72535700 | 0.02789500                  |
| H                                            | -2.27416900 | -1.98385100 | 0.95962700                  |
| C                                            | -2.62484500 | -2.73739500 | -0.99810700                 |
| H                                            | -2.51227200 | -2.28796300 | -1.99460800                 |
| H                                            | -3.52816800 | -3.37506000 | -1.03462500                 |
| C                                            | -1.41566400 | -3.61364100 | -0.74639400                 |
| C                                            | -0.80355400 | -4.39102700 | -1.82838600                 |
| H                                            | -1.26693800 | -3.91165600 | 0.29148100                  |
| H                                            | -1.22586500 | -4.34978100 | -2.83352900                 |
| H                                            | -0.25569000 | -5.30491700 | -1.59799100                 |
| O                                            | -0.18428600 | -3.17217900 | -1.38533200                 |
| Zero-point correction=                       |             |             | 0.592269 (Hartree/Particle) |
| Thermal correction to Energy=                |             |             | 0.625629                    |
| Thermal correction to Enthalpy=              |             |             | 0.626574                    |
| Thermal correction to Gibbs Free Energy=     |             |             | 0.524540                    |
| Sum of electronic and zero-point Energies=   |             |             | -1439.371029                |
| Sum of electronic and thermal Energies=      |             |             | -1439.337669                |
| Sum of electronic and thermal Enthalpies=    |             |             | -1439.336725                |
| Sum of electronic and thermal Free Energies= |             |             | -1439.438758                |
| M06-2X/6-311++G(d,p)/SMD//B3LYP/6-31G(d,p)   |             |             | energy= -1439.81099115      |

#### INT4'

|   |             |             |             |
|---|-------------|-------------|-------------|
| O | 3.07263100  | -0.82195800 | 3.16491000  |
| C | 0.02993800  | -1.55571100 | 1.85732300  |
| C | 0.12251200  | -0.92395300 | 0.47960900  |
| H | -0.24649600 | -1.64564700 | -0.26108200 |
| H | -0.54593300 | -0.05736900 | 0.44849300  |
| C | 3.41582400  | 0.11489700  | 2.55681900  |
| O | 3.78161100  | 1.06831300  | 1.98531200  |
| N | 1.47190000  | -0.47114400 | 0.16718800  |
| C | 2.37942400  | -1.29784500 | -0.50188300 |
| C | 2.19121600  | -2.68752200 | -0.63107200 |
| C | 3.55464600  | -0.73284500 | -1.04078700 |
| C | 3.14595800  | -3.47088800 | -1.28177300 |
| H | 1.30135400  | -3.16317100 | -0.23162400 |
| C | 4.49577500  | -1.52659300 | -1.68761200 |
| H | 3.72268900  | 0.33605700  | -0.93841400 |
| C | 4.30284800  | -2.90531500 | -1.81616500 |
| H | 2.97491900  | -4.54141000 | -1.36782000 |
| H | 5.39008600  | -1.06127300 | -2.09553800 |
| H | 5.04065700  | -3.52309600 | -2.31976800 |
| C | -0.43656600 | -0.79760600 | 3.02332700  |
| O | -1.30427800 | -1.74589500 | 2.37079600  |
| H | 1.50535500  | 0.51462400  | -0.10320700 |

|                                              |             |             |                             |
|----------------------------------------------|-------------|-------------|-----------------------------|
| H                                            | 0.69032700  | -2.40367700 | 2.03603300                  |
| H                                            | -0.11903800 | -1.08408600 | 4.02490900                  |
| H                                            | -0.72179000 | 0.24790500  | 2.90325500                  |
| N                                            | 1.06332900  | 2.60743700  | -0.50277600                 |
| C                                            | 0.82693500  | 3.06497300  | 0.87463800                  |
| H                                            | 0.03311300  | 2.42490600  | 1.28348400                  |
| H                                            | 1.73441600  | 2.84275100  | 1.44840200                  |
| C                                            | 0.41986800  | 4.53024500  | 1.11362200                  |
| H                                            | 0.18371500  | 4.67304500  | 2.17530000                  |
| H                                            | 1.21982500  | 5.23169300  | 0.85871300                  |
| H                                            | -0.47174700 | 4.80377300  | 0.53921800                  |
| C                                            | -0.12801100 | 2.68883600  | -1.35969800                 |
| H                                            | -0.97879100 | 2.34195100  | -0.76147000                 |
| H                                            | -0.36393600 | 3.72668900  | -1.65121700                 |
| C                                            | -0.02709900 | 1.82878100  | -2.62120900                 |
| H                                            | 0.21686200  | 0.79078600  | -2.37106700                 |
| H                                            | -0.98732400 | 1.83804900  | -3.14822900                 |
| H                                            | 0.73538600  | 2.19692400  | -3.31632600                 |
| C                                            | 2.31854700  | 3.06327700  | -1.12287100                 |
| H                                            | 2.58758900  | 2.33317300  | -1.89659100                 |
| H                                            | 3.09560300  | 2.98930700  | -0.35287900                 |
| C                                            | 2.36261500  | 4.46402500  | -1.76064500                 |
| H                                            | 2.19375600  | 5.26412200  | -1.03460900                 |
| H                                            | 3.35025800  | 4.62407300  | -2.20957800                 |
| H                                            | 1.62040500  | 4.57274200  | -2.55911800                 |
| C                                            | -3.77350700 | 2.27005000  | 1.04895700                  |
| C                                            | -3.51814300 | 0.90862400  | 1.16984600                  |
| C                                            | -3.70006300 | 0.03760900  | 0.07200400                  |
| C                                            | -4.14223400 | 0.59020800  | -1.14604800                 |
| C                                            | -4.39918700 | 1.95881900  | -1.25037700                 |
| C                                            | -4.21694700 | 2.81220900  | -0.16274400                 |
| H                                            | -3.63153200 | 2.91463000  | 1.91338100                  |
| H                                            | -3.19180100 | 0.49252000  | 2.11955000                  |
| H                                            | -4.28919500 | -0.04505500 | -2.01327800                 |
| H                                            | -4.74450700 | 2.35766800  | -2.20137700                 |
| H                                            | -4.42034300 | 3.87526200  | -0.25215800                 |
| N                                            | -3.46080500 | -1.32078100 | 0.23982700                  |
| H                                            | -2.81178200 | -1.53543000 | 0.99490900                  |
| C                                            | -3.37327900 | -2.21257600 | -0.90093900                 |
| H                                            | -2.64007400 | -1.87082700 | -1.65272500                 |
| H                                            | -4.35013600 | -2.25985900 | -1.40425800                 |
| C                                            | -3.00079600 | -3.60497700 | -0.45545700                 |
| C                                            | -2.22809700 | -4.50415800 | -1.32193900                 |
| H                                            | -3.65911800 | -4.04495100 | 0.29548300                  |
| H                                            | -1.90593200 | -4.16092700 | -2.30533700                 |
| H                                            | -2.34525500 | -5.58318200 | -1.22280500                 |
| O                                            | -1.60316300 | -3.85004300 | -0.20975200                 |
| Zero-point correction=                       |             |             | 0.597934 (Hartree/Particle) |
| Thermal correction to Energy=                |             |             | 0.631548                    |
| Thermal correction to Enthalpy=              |             |             | 0.632492                    |
| Thermal correction to Gibbs Free Energy=     |             |             | 0.529465                    |
| Sum of electronic and zero-point Energies=   |             |             | -1439.406021                |
| Sum of electronic and thermal Energies=      |             |             | -1439.372408                |
| Sum of electronic and thermal Enthalpies=    |             |             | -1439.371463                |
| Sum of electronic and thermal Free Energies= |             |             | -1439.474491                |
| M06-2X/6-311++G(d,p)/SMD//B3LYP/6-31G(d,p)   |             |             | energy= -1439.84468226      |

## INT3''

|   |             |             |             |
|---|-------------|-------------|-------------|
| C | -0.61354600 | 0.16270800  | -0.98137000 |
| C | 0.06189500  | 1.44391100  | -1.56589500 |
| H | 1.13381500  | 1.36803500  | -1.34561400 |
| H | -0.03702400 | 1.40470200  | -2.65724300 |
| N | -0.50090400 | 2.71604800  | -1.10464200 |
| C | -0.06627300 | 3.36378600  | 0.05283500  |
| C | 0.71575300  | 2.72428100  | 1.03365200  |
| C | -0.44654700 | 4.70364200  | 0.27502000  |
| C | 1.09165500  | 3.40874300  | 2.18981000  |
| H | 1.03965500  | 1.69939200  | 0.89044900  |
| C | -0.06424000 | 5.37363800  | 1.43225400  |
| H | -1.04762700 | 5.21557100  | -0.47511400 |
| C | 0.70758500  | 4.73249700  | 2.40547400  |
| H | 1.70195900  | 2.89340400  | 2.92766200  |
| H | -0.36983000 | 6.40801800  | 1.57214200  |
| H | 1.00721200  | 5.25678900  | 3.30828300  |
| C | -2.10963200 | 0.22086200  | -1.42237600 |
| O | -0.01488900 | -0.96372500 | -1.41647500 |
| H | -0.73356900 | 3.36192200  | -1.84752200 |
| H | -0.60445700 | 0.30710900  | 0.13283900  |
| H | -2.14137800 | -0.19941400 | -2.43126000 |
| H | -2.50063600 | 1.24101100  | -1.41745600 |
| N | -3.09383900 | -0.61454800 | -0.57992200 |
| C | -2.37964700 | -1.92558500 | -0.14768300 |
| H | -1.55730600 | -2.04774400 | -0.86622800 |
| H | -1.89229500 | -1.69089400 | 0.79791600  |
| C | -3.23274900 | -3.17833200 | -0.00013200 |
| H | -2.55928600 | -3.93495300 | 0.41486200  |
| H | -4.07393100 | -3.07795400 | 0.69313800  |
| H | -3.61058800 | -3.55952700 | -0.95375200 |
| C | -4.31065500 | -0.93366400 | -1.42758700 |
| H | -3.93681100 | -1.55529900 | -2.24460300 |
| H | -4.97573200 | -1.54971400 | -0.82191100 |
| C | -5.07471300 | 0.26449100  | -1.98308600 |
| H | -4.45741700 | 0.89743500  | -2.62439600 |
| H | -5.89869700 | -0.12163600 | -2.59264500 |
| H | -5.51633100 | 0.88476200  | -1.19788700 |
| C | -3.45508600 | 0.21927900  | 0.63956000  |
| H | -3.89549600 | 1.14545900  | 0.26458100  |
| H | -2.49809000 | 0.48230500  | 1.09418200  |
| C | -4.37522700 | -0.43547100 | 1.66191900  |
| H | -3.92258300 | -1.31297100 | 2.13000000  |
| H | -4.56343300 | 0.29726200  | 2.45382300  |
| H | -5.34634200 | -0.71896200 | 1.24375500  |
| C | 4.41331800  | -0.00013300 | -2.25269300 |
| C | 3.28954600  | -0.63536900 | -1.74210300 |
| C | 3.32108600  | -1.24634600 | -0.46367600 |
| C | 4.52313900  | -1.17306400 | 0.27184400  |
| C | 5.64668300  | -0.53868200 | -0.26392800 |
| C | 5.60960800  | 0.05244700  | -1.52500800 |
| H | 4.35884100  | 0.45797000  | -3.23845900 |
| H | 2.35906500  | -0.68095400 | -2.30057800 |
| H | 4.58511700  | -1.59687400 | 1.26939300  |
| H | 6.56000900  | -0.50114900 | 0.32672600  |
| H | 6.48684000  | 0.54752000  | -1.93241900 |
| N | 2.18433800  | -1.89831600 | -0.02156000 |



|                                              |             |             |                             |
|----------------------------------------------|-------------|-------------|-----------------------------|
| H                                            | 1.29244600  | -1.59130700 | -0.47592100                 |
| C                                            | 2.11607600  | -2.52051800 | 1.27336000                  |
| H                                            | 1.98308800  | -1.81104800 | 2.11381700                  |
| H                                            | 3.05733200  | -3.05639000 | 1.46578100                  |
| C                                            | 1.01273200  | -3.55086300 | 1.34176700                  |
| C                                            | 0.46163200  | -3.99804700 | 2.62796500                  |
| H                                            | 0.98294800  | -4.24088300 | 0.49751900                  |
| H                                            | 0.82212100  | -3.54634100 | 3.55296400                  |
| H                                            | 0.06788000  | -5.00957200 | 2.73150700                  |
| O                                            | -0.29523600 | -3.12285500 | 1.77960000                  |
| Zero-point correction=                       |             |             | 0.583096 (Hartree/Particle) |
| Thermal correction to Energy=                |             |             | 0.613799                    |
| Thermal correction to Enthalpy=              |             |             | 0.614744                    |
| Thermal correction to Gibbs Free Energy=     |             |             | 0.517398                    |
| Sum of electronic and zero-point Energies=   |             |             | -1250.824512                |
| Sum of electronic and thermal Energies=      |             |             | -1250.793808                |
| Sum of electronic and thermal Enthalpies=    |             |             | -1250.792864                |
| Sum of electronic and thermal Free Energies= |             |             | -1250.890209                |
| M06-2X/6-311++G(d,p)/SMD//B3LYP/6-31G(d,p)   |             |             | energy= -1251.26132148      |

### TS2''

|   |             |             |             |
|---|-------------|-------------|-------------|
| C | -0.61140200 | 0.31239200  | -0.75076400 |
| C | 0.28543600  | 1.26484900  | -1.60187200 |
| H | 1.31429600  | 0.89466600  | -1.52143100 |
| H | -0.00801600 | 1.15664100  | -2.65299400 |
| N | 0.18498900  | 2.68143600  | -1.24770400 |
| C | 0.97550000  | 3.27388600  | -0.25949800 |
| C | 1.72945100  | 2.52384100  | 0.66261200  |
| C | 1.00024100  | 4.67969900  | -0.15401000 |
| C | 2.47344200  | 3.16921600  | 1.65098600  |
| H | 1.75249700  | 1.44138800  | 0.60186100  |
| C | 1.74675300  | 5.30938400  | 0.83629000  |
| H | 0.42460200  | 5.27477000  | -0.86148700 |
| C | 2.49004300  | 4.56035700  | 1.75302900  |
| H | 3.05546400  | 2.56591800  | 2.34339000  |
| H | 1.74949500  | 6.39567500  | 0.88914700  |
| H | 3.07451000  | 5.05271400  | 2.52487200  |
| C | -2.07834400 | 0.75559000  | -1.01901500 |
| O | -0.38856600 | -0.99404600 | -1.05881200 |
| H | 0.01173200  | 3.29711800  | -2.03113600 |
| H | -0.38055500 | 0.55660500  | 0.31535800  |
| H | -2.38765100 | 0.28441300  | -1.95217000 |
| H | -2.14643300 | 1.84241300  | -1.09907600 |
| N | -3.12849700 | 0.34717600  | 0.03431700  |
| C | -2.75778700 | -1.05056500 | 0.59625000  |
| H | -2.11448500 | -1.50261100 | -0.16592900 |
| H | -2.10228000 | -0.86017100 | 1.44531700  |
| C | -3.89937700 | -1.96986500 | 1.01155600  |
| H | -3.41525300 | -2.83847500 | 1.46867600  |
| H | -4.57740100 | -1.54361200 | 1.75778000  |
| H | -4.49278000 | -2.32785600 | 0.16495200  |
| C | -4.48547100 | 0.29623900  | -0.64546700 |
| H | -4.40113100 | -0.49802000 | -1.39090500 |
| H | -5.21135600 | -0.02283400 | 0.10273100  |
| C | -4.95154200 | 1.59025000  | -1.30579500 |
| H | -4.26703100 | 1.93529600  | -2.08389700 |
| H | -5.91709900 | 1.38836900  | -1.78165200 |

|                                              |             |             |                             |
|----------------------------------------------|-------------|-------------|-----------------------------|
| H                                            | -5.10822600 | 2.40154700  | -0.58871400                 |
| C                                            | -3.08395800 | 1.38910300  | 1.14029500                  |
| H                                            | -3.31674400 | 2.34801300  | 0.67334600                  |
| H                                            | -2.03738200 | 1.42905800  | 1.44956100                  |
| C                                            | -3.98998500 | 1.14571700  | 2.34038800                  |
| H                                            | -3.72344600 | 0.23798800  | 2.88671000                  |
| H                                            | -3.86443100 | 1.98990000  | 3.02680000                  |
| H                                            | -5.05066600 | 1.09909500  | 2.07358500                  |
| C                                            | 4.23042700  | -0.96691600 | -1.94377100                 |
| C                                            | 3.02063000  | -1.37089500 | -1.39459300                 |
| C                                            | 2.92228900  | -1.69478300 | -0.01965200                 |
| C                                            | 4.08701400  | -1.58506100 | 0.76851500                  |
| C                                            | 5.29811900  | -1.18793600 | 0.19580500                  |
| C                                            | 5.38662400  | -0.87421400 | -1.15845400                 |
| H                                            | 4.27553900  | -0.72980000 | -3.00472500                 |
| H                                            | 2.12865400  | -1.46096700 | -2.00631300                 |
| H                                            | 4.05298300  | -1.79561200 | 1.83287900                  |
| H                                            | 6.17986500  | -1.11503300 | 0.82926000                  |
| H                                            | 6.33110500  | -0.56234100 | -1.59550200                 |
| N                                            | 1.70020400  | -2.12332700 | 0.47315800                  |
| H                                            | 0.86835800  | -1.77925200 | -0.04766800                 |
| C                                            | 1.53446900  | -2.49511400 | 1.85397300                  |
| H                                            | 1.50913800  | -1.64009600 | 2.55800500                  |
| H                                            | 2.38745100  | -3.12055400 | 2.15622600                  |
| C                                            | 0.28849800  | -3.32240100 | 2.06954400                  |
| C                                            | -0.28994800 | -3.48965500 | 3.40925500                  |
| H                                            | 0.13150200  | -4.11242500 | 1.33429300                  |
| H                                            | 0.16115600  | -2.97292500 | 4.25729300                  |
| H                                            | -0.83227700 | -4.40159900 | 3.65979800                  |
| O                                            | -0.92567900 | -2.63674800 | 2.44645100                  |
| C                                            | -1.00566800 | -2.09221800 | -3.08388800                 |
| O                                            | -0.11349400 | -2.84899000 | -3.04545200                 |
| O                                            | -1.97767600 | -1.47894200 | -3.35430600                 |
| Zero-point correction=                       |             |             | 0.596070 (Hartree/Particle) |
| Thermal correction to Energy=                |             |             | 0.630097                    |
| Thermal correction to Enthalpy=              |             |             | 0.631041                    |
| Thermal correction to Gibbs Free Energy=     |             |             | 0.525234                    |
| Sum of electronic and zero-point Energies=   |             |             | -1439.405092                |
| Sum of electronic and thermal Energies=      |             |             | -1439.371065                |
| Sum of electronic and thermal Enthalpies=    |             |             | -1439.370121                |
| Sum of electronic and thermal Free Energies= |             |             | -1439.475928                |
| M06-2X/6-311++G(d,p)/SMD//B3LYP/6-31G(d,p)   |             |             | energy= -1439.84763013      |

#### INT4''

|   |            |             |             |
|---|------------|-------------|-------------|
| C | 1.20923300 | 0.50902300  | 1.22337400  |
| C | 2.47956600 | 0.56555800  | 2.09667100  |
| H | 2.66324100 | 1.62029600  | 2.33899400  |
| H | 2.25014700 | 0.06046700  | 3.04032400  |
| N | 3.65722500 | -0.07551700 | 1.52099400  |
| C | 4.54092000 | 0.60538200  | 0.67189300  |
| C | 4.18946500 | 1.79506900  | 0.00876300  |
| C | 5.81521000 | 0.05457600  | 0.42921900  |
| C | 5.09221100 | 2.40534200  | -0.86498600 |
| H | 3.22371900 | 2.25709900  | 0.18160300  |
| C | 6.70499400 | 0.67406800  | -0.44191900 |
| H | 6.10352700 | -0.86392000 | 0.93780400  |
| C | 6.35129100 | 1.85548300  | -1.10055100 |

|                        |             |             |                             |
|------------------------|-------------|-------------|-----------------------------|
| H                      | 4.79988800  | 3.32783400  | -1.35997700                 |
| H                      | 7.68466400  | 0.23148400  | -0.60371000                 |
| H                      | 7.04730100  | 2.33832400  | -1.77983000                 |
| C                      | 0.76287000  | -0.94530300 | 0.88553200                  |
| O                      | 0.20711500  | 1.07596200  | 2.03750100                  |
| H                      | 4.13979900  | -0.68526300 | 2.16817200                  |
| H                      | 1.33054200  | 1.10493900  | 0.31544800                  |
| H                      | -0.28969900 | -1.02436500 | 1.16107700                  |
| H                      | 1.33256300  | -1.66566800 | 1.47502700                  |
| N                      | 0.83156000  | -1.45890700 | -0.56831100                 |
| C                      | 0.29470500  | -0.36625200 | -1.52621500                 |
| H                      | -0.34059500 | 0.29427100  | -0.92720800                 |
| H                      | 1.17221000  | 0.21844200  | -1.81015400                 |
| C                      | -0.46287400 | -0.82936000 | -2.76747700                 |
| H                      | -0.68725300 | 0.07859200  | -3.33820600                 |
| H                      | 0.10127800  | -1.49768600 | -3.42412000                 |
| H                      | -1.42099300 | -1.29354200 | -2.51962900                 |
| C                      | -0.06421600 | -2.69518800 | -0.64673400                 |
| H                      | -1.07629900 | -2.34764600 | -0.43109600                 |
| H                      | -0.03747500 | -3.03229000 | -1.68207200                 |
| C                      | 0.29936200  | -3.84907300 | 0.28096600                  |
| H                      | 0.22977900  | -3.58317500 | 1.33787300                  |
| H                      | -0.43709300 | -4.63894500 | 0.10401100                  |
| H                      | 1.29016800  | -4.26845700 | 0.07983400                  |
| C                      | 2.27925600  | -1.78828100 | -0.89942700                 |
| H                      | 2.61374100  | -2.50074800 | -0.14390200                 |
| H                      | 2.83809000  | -0.86822600 | -0.73105900                 |
| C                      | 2.54934600  | -2.32609700 | -2.29897500                 |
| H                      | 2.30720400  | -1.60171800 | -3.08025800                 |
| H                      | 3.62341400  | -2.52844700 | -2.36756800                 |
| H                      | 2.02649300  | -3.26351800 | -2.51149400                 |
| C                      | -3.07945700 | -2.59825500 | 1.70689700                  |
| C                      | -3.17069400 | -1.21745100 | 1.58014500                  |
| C                      | -3.66643600 | -0.62848000 | 0.38541000                  |
| C                      | -4.01651700 | -1.49610900 | -0.67797100                 |
| C                      | -3.91515700 | -2.88182800 | -0.52951500                 |
| C                      | -3.45059100 | -3.45229900 | 0.65691400                  |
| H                      | -2.72202100 | -3.01732300 | 2.64565400                  |
| H                      | -2.88081700 | -0.56078600 | 2.39611900                  |
| H                      | -4.40888000 | -1.08682200 | -1.60333100                 |
| H                      | -4.21847200 | -3.52138400 | -1.35627000                 |
| H                      | -3.39955200 | -4.53151800 | 0.77290400                  |
| N                      | -3.80902300 | 0.73168700  | 0.31396100                  |
| H                      | -3.29102900 | 1.26490100  | 1.02244300                  |
| C                      | -4.01485200 | 1.41965500  | -0.94627000                 |
| H                      | -5.01461400 | 1.20118200  | -1.34801100                 |
| H                      | -3.27716000 | 1.09275500  | -1.70205600                 |
| C                      | -3.87564000 | 2.91280600  | -0.76970800                 |
| C                      | -4.56939900 | 3.84404900  | -1.66857300                 |
| H                      | -2.94649700 | 3.22657100  | -0.29478200                 |
| H                      | -5.20853900 | 3.45626100  | -2.46447100                 |
| H                      | -4.14006900 | 4.82764500  | -1.86370800                 |
| O                      | -5.04676400 | 3.62692500  | -0.33860500                 |
| C                      | -0.92093400 | 1.68882500  | 1.35805800                  |
| O                      | -1.87426100 | 1.88522100  | 2.12106500                  |
| O                      | -0.77471800 | 1.89494000  | 0.13328900                  |
| Zero-point correction= |             |             | 0.600409 (Hartree/Particle) |

|                                              |                      |
|----------------------------------------------|----------------------|
| Thermal correction to Energy=                | 0.633684             |
| Thermal correction to Enthalpy=              | 0.634628             |
| Thermal correction to Gibbs Free Energy=     | 0.532078             |
| Sum of electronic and zero-point Energies=   | -1439.411839         |
| Sum of electronic and thermal Energies=      | -1439.378564         |
| Sum of electronic and thermal Enthalpies=    | -1439.377620         |
| Sum of electronic and thermal Free Energies= | -1439.480169         |
| M06-2X/6-311++G(d,p)/SMD//B3LYP/6-31G(d,p)   | energy= -1439.884668 |

**TS3''**

|   |             |             |             |
|---|-------------|-------------|-------------|
| C | 0.84190300  | 0.25745800  | 1.07789300  |
| C | 1.99671900  | 0.65446400  | 2.02833300  |
| H | 1.92477500  | 1.73629400  | 2.19882400  |
| H | 1.81319200  | 0.15636200  | 2.98194900  |
| N | 3.31978700  | 0.27440300  | 1.55596200  |
| C | 4.13331400  | 1.12446900  | 0.80344900  |
| C | 3.62922900  | 2.24968900  | 0.12504100  |
| C | 5.50560400  | 0.82846300  | 0.67708700  |
| C | 4.47791900  | 3.04522500  | -0.64766500 |
| H | 2.58018100  | 2.51521400  | 0.20486300  |
| C | 6.33929700  | 1.62947000  | -0.09547400 |
| H | 5.91260900  | -0.03689600 | 1.19729800  |
| C | 5.83414600  | 2.74659100  | -0.76787800 |
| H | 4.06474400  | 3.91209900  | -1.15721800 |
| H | 7.39495200  | 1.38028000  | -0.16884700 |
| H | 6.48708600  | 3.37120500  | -1.36993500 |
| C | 0.70029500  | -1.24356300 | 0.89825300  |
| O | -0.38257600 | 0.75174100  | 1.60939700  |
| H | 3.83744600  | -0.30535500 | 2.20223500  |
| H | 0.97002300  | 0.76472100  | 0.11956000  |
| H | -0.25133900 | -1.68321700 | 0.65192100  |
| H | 1.48179100  | -1.89190900 | 1.26356100  |
| N | 1.15295700  | -1.60265900 | -1.08139900 |
| C | 0.14107500  | -0.77577000 | -1.82237200 |
| H | -0.74916200 | -0.70788800 | -1.18819100 |
| H | 0.55898900  | 0.23158500  | -1.90069000 |
| C | -0.30782000 | -1.24391100 | -3.21252400 |
| H | -0.98389500 | -0.48205800 | -3.61558500 |
| H | 0.51705200  | -1.36496100 | -3.91984500 |
| H | -0.87002300 | -2.18073400 | -3.16734700 |
| C | 0.86905200  | -3.05989900 | -1.23858200 |
| H | -0.16645000 | -3.20780300 | -0.91687900 |
| H | 0.91428100  | -3.32035400 | -2.30241500 |
| C | 1.79060100  | -4.00813800 | -0.47018100 |
| H | 1.75530100  | -3.85515900 | 0.61119300  |
| H | 1.45690900  | -5.03364100 | -0.66186500 |
| H | 2.83290100  | -3.94050000 | -0.79685900 |
| C | 2.56344500  | -1.22714600 | -1.36661900 |
| H | 3.18164600  | -1.71024000 | -0.60626700 |
| H | 2.64979200  | -0.15394900 | -1.18309500 |
| C | 3.11321200  | -1.54773900 | -2.76082800 |
| H | 2.61675100  | -0.96997200 | -3.54524900 |
| H | 4.17606100  | -1.28309500 | -2.78264900 |
| H | 3.03125600  | -2.61042600 | -3.01149400 |
| C | -3.77733100 | 3.79536900  | -0.50577900 |
| C | -3.34628200 | 2.62289500  | 0.10105800  |
| C | -3.96092400 | 1.38763800  | -0.20049600 |

|                                              |             |             |                             |
|----------------------------------------------|-------------|-------------|-----------------------------|
| C                                            | -5.02163000 | 1.37929300  | -1.12529700                 |
| C                                            | -5.43807800 | 2.56614800  | -1.73318800                 |
| C                                            | -4.82603800 | 3.78144700  | -1.43347600                 |
| H                                            | -3.28892900 | 4.73354100  | -0.25197700                 |
| H                                            | -2.52433700 | 2.63404200  | 0.81250200                  |
| H                                            | -5.53201900 | 0.45274800  | -1.36800900                 |
| H                                            | -6.26111200 | 2.53271200  | -2.44370400                 |
| H                                            | -5.15979000 | 4.70114100  | -1.90559000                 |
| N                                            | -3.46182700 | 0.23561400  | 0.40163700                  |
| H                                            | -3.00564500 | 0.40362700  | 1.29990300                  |
| C                                            | -4.17785900 | -1.02460800 | 0.35053900                  |
| H                                            | -4.39428200 | -1.28401600 | -0.69261100                 |
| H                                            | -5.14592100 | -0.99274600 | 0.88599300                  |
| C                                            | -3.32520600 | -2.12200700 | 0.94211400                  |
| C                                            | -3.42608700 | -3.51116500 | 0.48066300                  |
| H                                            | -2.95758100 | -1.93982000 | 1.95187500                  |
| H                                            | -4.13344700 | -3.76927900 | -0.30829200                 |
| H                                            | -3.17052200 | -4.32545500 | 1.15843800                  |
| O                                            | -2.32552500 | -2.68868100 | 0.06014000                  |
| C                                            | -0.91255900 | -0.14779300 | 2.56257900                  |
| O                                            | -2.00115300 | 0.14880900  | 3.04357800                  |
| O                                            | -0.18270900 | -1.18297800 | 2.73578500                  |
| Zero-point correction=                       |             |             | 0.598027 (Hartree/Particle) |
| Thermal correction to Energy=                |             |             | 0.631411                    |
| Thermal correction to Enthalpy=              |             |             | 0.632355                    |
| Thermal correction to Gibbs Free Energy=     |             |             | 0.528953                    |
| Sum of electronic and zero-point Energies=   |             |             | -1439.393709                |
| Sum of electronic and thermal Energies=      |             |             | -1439.360325                |
| Sum of electronic and thermal Enthalpies=    |             |             | -1439.359381                |
| Sum of electronic and thermal Free Energies= |             |             | -1439.462783                |
| M06-2X/6-311++G(d,p)/SMD//B3LYP/6-31G(d,p)   |             |             | energy= -1439.83321631      |

### INT1a

|   |             |             |             |
|---|-------------|-------------|-------------|
| N | 0.15739400  | -0.16868400 | 0.02557000  |
| C | -0.29425400 | -1.53544600 | 0.44886400  |
| H | -0.52599100 | -2.07628300 | -0.47238600 |
| H | 0.54614000  | -2.04253900 | 0.93489200  |
| C | -1.50496800 | -1.55810600 | 1.37727600  |
| H | -1.76363900 | -2.60524700 | 1.57108100  |
| H | -1.30333100 | -1.08662900 | 2.34378200  |
| H | -2.38125000 | -1.07653000 | 0.93164500  |
| C | 0.57522000  | 0.64935400  | 1.20444000  |
| H | -0.32867500 | 0.82676100  | 1.78659400  |
| H | 1.25663500  | 0.04552300  | 1.81611900  |
| C | 1.21958000  | 1.98928700  | 0.86320700  |
| H | 0.58120800  | 2.58403500  | 0.20405300  |
| H | 1.35429800  | 2.55125200  | 1.79459300  |
| H | 2.20532200  | 1.88071300  | 0.40084200  |
| C | 1.21624800  | -0.27917600 | -1.02877700 |
| H | 1.41140700  | 0.73284800  | -1.39135700 |
| H | 0.75854300  | -0.82977300 | -1.85221100 |
| C | 2.52479900  | -0.94372800 | -0.60318300 |
| H | 2.39045200  | -1.99167500 | -0.31847200 |
| H | 3.21370200  | -0.92192000 | -1.45565000 |
| H | 3.01129000  | -0.41974000 | 0.22626900  |
| C | -1.31944900 | 0.60398300  | -0.79810100 |
| O | -1.49554700 | 0.02746900  | -1.84712800 |

|                                              |             |            |                             |
|----------------------------------------------|-------------|------------|-----------------------------|
| O                                            | -1.75831900 | 1.47915300 | -0.08801500                 |
| Zero-point correction=                       |             |            | 0.221975 (Hartree/Particle) |
| Thermal correction to Energy=                |             |            | 0.234189                    |
| Thermal correction to Enthalpy=              |             |            | 0.235133                    |
| Thermal correction to Gibbs Free Energy=     |             |            | 0.184458                    |
| Sum of electronic and zero-point Energies=   |             |            | -480.781884                 |
| Sum of electronic and thermal Energies=      |             |            | -480.769671                 |
| Sum of electronic and thermal Enthalpies=    |             |            | -480.768727                 |
| Sum of electronic and thermal Free Energies= |             |            | -480.819401                 |
| M06-2X/6-311++G(d,p)/SMD//B3LYP/6-31G(d,p)   |             |            | energy= -480.93467870       |

**TS1a**

|   |             |             |             |
|---|-------------|-------------|-------------|
| N | 3.49163300  | -0.47005600 | 0.14387300  |
| C | 3.85336600  | -0.02571700 | 1.56319500  |
| H | 2.92636800  | -0.08395500 | 2.13493500  |
| H | 4.54963900  | -0.77177600 | 1.94737900  |
| C | 4.45914900  | 1.36756100  | 1.66320200  |
| H | 4.65452200  | 1.55980000  | 2.72375500  |
| H | 5.41048100  | 1.45456900  | 1.13180400  |
| H | 3.78089900  | 2.14953600  | 1.30820800  |
| C | 4.75110100  | -0.61468600 | -0.69410800 |
| H | 5.15831000  | 0.38859900  | -0.79607600 |
| H | 5.44295400  | -1.21083100 | -0.09618600 |
| C | 4.54555100  | -1.23634900 | -2.06914100 |
| H | 3.78380300  | -0.70855300 | -2.64832500 |
| H | 5.49438900  | -1.15120500 | -2.61048100 |
| H | 4.28897000  | -2.29812900 | -2.02170600 |
| C | 2.68977000  | -1.76961600 | 0.20684000  |
| H | 2.35714700  | -1.97046300 | -0.81297000 |
| H | 1.81061500  | -1.53985600 | 0.80616000  |
| C | 3.43522200  | -2.96609400 | 0.77997700  |
| H | 3.71567700  | -2.82510100 | 1.82734000  |
| H | 2.74985100  | -3.81998100 | 0.73700100  |
| H | 4.32776800  | -3.23174200 | 0.20653100  |
| C | 2.55925500  | 0.66219300  | -0.46389400 |
| O | 1.42841400  | 0.64721800  | 0.11099900  |
| O | 3.03132800  | 1.37321200  | -1.32356700 |
| C | -6.64589300 | -0.29296000 | -0.17952800 |
| C | -5.56149100 | 0.56049800  | -0.00479400 |
| C | -4.25478100 | 0.04837400  | 0.17391900  |
| C | -4.08671200 | -1.35331600 | 0.16123900  |
| C | -5.18573600 | -2.19760300 | -0.01229300 |
| C | -6.47265300 | -1.68318300 | -0.18395100 |
| H | -7.63793100 | 0.13202100  | -0.31648200 |
| H | -5.70759200 | 1.63895200  | -0.00271600 |
| H | -3.09689200 | -1.78017500 | 0.28989300  |
| H | -5.02634000 | -3.27381900 | -0.01708200 |
| H | -7.32189200 | -2.34682800 | -0.32106600 |
| N | -3.20382600 | 0.92078100  | 0.39163300  |
| H | -3.33651000 | 1.86771500  | 0.03261200  |
| C | -1.81305000 | 0.54986200  | 0.18279600  |
| H | -1.65721200 | 0.11385800  | -0.82026800 |
| H | -1.48980400 | -0.19340900 | 0.92297400  |
| C | -1.00669600 | 1.86222000  | 0.31601500  |
| C | 0.25972400  | 1.91188600  | -0.45059400 |
| O | -1.52974400 | 2.89920000  | -0.40376700 |
| H | -0.84979900 | 2.06161100  | 1.40209800  |

|                                              |            |            |                             |
|----------------------------------------------|------------|------------|-----------------------------|
| H                                            | 0.87837200 | 2.78276700 | -0.27081100                 |
| H                                            | 0.18282500 | 1.60585200 | -1.48766000                 |
| Zero-point correction=                       |            |            | 0.408608 (Hartree/Particle) |
| Thermal correction to Energy=                |            |            | 0.430975                    |
| Thermal correction to Enthalpy=              |            |            | 0.431919                    |
| Thermal correction to Gibbs Free Energy=     |            |            | 0.354859                    |
| Sum of electronic and zero-point Energies=   |            |            | -960.066796                 |
| Sum of electronic and thermal Energies=      |            |            | -960.044429                 |
| Sum of electronic and thermal Enthalpies=    |            |            | -960.043485                 |
| Sum of electronic and thermal Free Energies= |            |            | -960.120545                 |
| M06-2X/6-311++G(d,p)/SMD//B3LYP/6-31G(d,p)   |            |            | energy= -960.33697295       |

### INT2a

|   |             |             |             |
|---|-------------|-------------|-------------|
| N | 3.34425100  | 0.44432800  | -0.17307100 |
| C | 3.66035700  | -0.14281200 | -1.56439500 |
| H | 2.71131600  | -0.15351900 | -2.10127200 |
| H | 4.32625200  | 0.57800600  | -2.03811500 |
| C | 4.28862100  | -1.52748100 | -1.54463100 |
| H | 4.47714700  | -1.80429500 | -2.58746200 |
| H | 5.24597100  | -1.55299900 | -1.01810700 |
| H | 3.62728900  | -2.29003500 | -1.12166600 |
| C | 4.64440800  | 0.72421600  | 0.58191100  |
| H | 5.10799300  | -0.24486300 | 0.75333200  |
| H | 5.26704000  | 1.28570200  | -0.11523700 |
| C | 4.47743000  | 1.47171700  | 1.89745000  |
| H | 3.79926400  | 0.95840700  | 2.58335500  |
| H | 5.46394100  | 1.51035000  | 2.37215400  |
| H | 4.13720000  | 2.50189700  | 1.76331600  |
| C | 2.49568500  | 1.71920700  | -0.33861600 |
| H | 2.17198800  | 1.99449800  | 0.66602300  |
| H | 1.61945800  | 1.41772700  | -0.90958700 |
| C | 3.20822900  | 2.87629400  | -1.02215700 |
| H | 3.50204400  | 2.64350900  | -2.04904900 |
| H | 2.48951300  | 3.70207500  | -1.06641700 |
| H | 4.08285600  | 3.22942600  | -0.47019000 |
| C | 2.53197400  | -0.61125500 | 0.58540700  |
| O | 1.34674300  | -0.71216400 | 0.05496200  |
| O | 3.02033400  | -1.23216500 | 1.49212000  |
| C | -6.51081100 | 0.21124200  | 0.04003600  |
| C | -5.39612800 | -0.59370400 | -0.16781300 |
| C | -4.09229400 | -0.03989200 | -0.20828300 |
| C | -3.96709500 | 1.35682900  | -0.02765600 |
| C | -5.09646100 | 2.15240600  | 0.17758000  |
| C | -6.37694900 | 1.59544000  | 0.21492200  |
| H | -7.49729000 | -0.24700400 | 0.06899500  |
| H | -5.51296400 | -1.66725200 | -0.30301400 |
| H | -2.98312100 | 1.81547000  | -0.05400300 |
| H | -4.96737900 | 3.22440200  | 0.31319600  |
| H | -7.25062800 | 2.22072800  | 0.37711300  |
| N | -3.01266300 | -0.85875000 | -0.45472400 |
| H | -3.09444700 | -1.85287100 | -0.18014800 |
| C | -1.64461300 | -0.50134800 | -0.12739000 |
| H | -1.57313000 | -0.07391500 | 0.89069400  |
| H | -1.24011400 | 0.24320000  | -0.82755400 |
| C | -0.86347600 | -1.86851500 | -0.18793800 |
| C | 0.44148600  | -1.77653500 | 0.60934100  |
| O | -1.58108700 | -2.87850700 | 0.32898100  |

|                                              |             |             |                             |
|----------------------------------------------|-------------|-------------|-----------------------------|
| H                                            | -0.56318100 | -1.99263900 | -1.27301300                 |
| H                                            | 0.99252000  | -2.71693000 | 0.55208700                  |
| H                                            | 0.24925000  | -1.52027700 | 1.65401600                  |
| Zero-point correction=                       |             |             | 0.409989 (Hartree/Particle) |
| Thermal correction to Energy=                |             |             | 0.432321                    |
| Thermal correction to Enthalpy=              |             |             | 0.433265                    |
| Thermal correction to Gibbs Free Energy=     |             |             | 0.356739                    |
| Sum of electronic and zero-point Energies=   |             |             | -960.072038                 |
| Sum of electronic and thermal Energies=      |             |             | -960.049706                 |
| Sum of electronic and thermal Enthalpies=    |             |             | -960.048762                 |
| Sum of electronic and thermal Free Energies= |             |             | -960.125288                 |
| M06-2X/6-311++G(d,p)/SMD//B3LYP/6-31G(d,p)   |             |             | energy= -960.35488021       |

### 3a

|                                              |             |             |                             |
|----------------------------------------------|-------------|-------------|-----------------------------|
| C                                            | 1.82548600  | -0.56163000 | 0.85033200                  |
| C                                            | 2.95771500  | -1.43946200 | 0.30071200                  |
| H                                            | 1.73845300  | -0.61679800 | 1.93657600                  |
| H                                            | 3.66967800  | -1.73869100 | 1.07383900                  |
| H                                            | 2.60430500  | -2.31826300 | -0.24080900                 |
| C                                            | 3.27645200  | 0.71108800  | -0.40007300                 |
| O                                            | 3.76774400  | 1.66801100  | -0.93854800                 |
| O                                            | 2.29417700  | 0.77943800  | 0.52965600                  |
| O                                            | 3.63502000  | -0.56776000 | -0.63456500                 |
| C                                            | 0.47803200  | -0.81317600 | 0.18815400                  |
| H                                            | 0.16917600  | -1.82564600 | 0.47114600                  |
| H                                            | 0.59749200  | -0.80147700 | -0.90922600                 |
| N                                            | -0.50162700 | 0.15042000  | 0.65995200                  |
| H                                            | -0.13992000 | 1.09851900  | 0.68508200                  |
| C                                            | -1.83425300 | 0.09275800  | 0.24962600                  |
| C                                            | -2.41113900 | -1.06331500 | -0.31077400                 |
| C                                            | -2.65573000 | 1.22460600  | 0.44173600                  |
| C                                            | -3.76665400 | -1.08075900 | -0.65000000                 |
| H                                            | -1.80970000 | -1.94945200 | -0.48506900                 |
| C                                            | -4.00279600 | 1.19403300  | 0.09542600                  |
| H                                            | -2.22074300 | 2.12579400  | 0.86913200                  |
| C                                            | -4.57491600 | 0.03952500  | -0.45242300                 |
| H                                            | -4.18818700 | -1.98610600 | -1.08074800                 |
| H                                            | -4.61081000 | 2.08168300  | 0.25391500                  |
| H                                            | -5.62705900 | 0.01797900  | -0.72214700                 |
| Zero-point correction=                       |             |             | 0.202472 (Hartree/Particle) |
| Thermal correction to Energy=                |             |             | 0.214186                    |
| Thermal correction to Enthalpy=              |             |             | 0.215130                    |
| Thermal correction to Gibbs Free Energy=     |             |             | 0.162700                    |
| Sum of electronic and zero-point Energies=   |             |             | -667.936250                 |
| Sum of electronic and thermal Energies=      |             |             | -667.924537                 |
| Sum of electronic and thermal Enthalpies=    |             |             | -667.923593                 |
| Sum of electronic and thermal Free Energies= |             |             | -667.976023                 |
| M06-2X/6-311++G(d,p)/SMD//B3LYP/6-31G(d,p)   |             |             | energy= -668.06414391       |



## 7. X-ray crystallographic data.

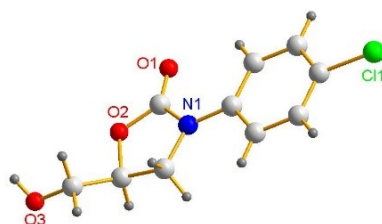

**Fig. S17** Crystal structure of (*S*)-**2y** (CCDC 2159922).

**Table S9** Crystallographic data of (*S*)-**2y**

|                                             |                                                               |
|---------------------------------------------|---------------------------------------------------------------|
| Empirical formula                           | C <sub>10</sub> H <sub>10</sub> NO <sub>3</sub> Cl            |
| Formula weight                              | 227.64                                                        |
| Temperature/K                               | 293(2)                                                        |
| Crystal system                              | orthorhombic                                                  |
| Space group                                 | P2 <sub>1</sub> 2 <sub>1</sub> 2 <sub>1</sub>                 |
| a/Å                                         | 7.3826(10)                                                    |
| b/Å                                         | 11.4210(15)                                                   |
| c/Å                                         | 11.6800(14)                                                   |
| α/°                                         | 90                                                            |
| β/°                                         | 90                                                            |
| γ/°                                         | 90                                                            |
| Volume/Å <sup>3</sup>                       | 984.8(2)                                                      |
| Z                                           | 14                                                            |
| ρ <sub>calc</sub> /g/cm <sup>3</sup>        | 1.853                                                         |
| μ/mm <sup>-1</sup>                          | 9.677                                                         |
| F(000)                                      | 546.0                                                         |
| Crystal size/mm <sup>3</sup>                | 0.35 × 0.3 × 0.2                                              |
| Radiation                                   | Cu Kα (λ = 1.54184)                                           |
| 2θ range for data collection/°              | 10.834 to 154.946                                             |
| Index ranges                                | -9 ≤ h ≤ 6, -14 ≤ k ≤ 11, -14 ≤ l ≤ 11                        |
| Reflections collected                       | 2560                                                          |
| Independent reflections                     | 1744 [R <sub>int</sub> = 0.0377, R <sub>sigma</sub> = 0.0537] |
| Data/restraints/parameters                  | 1744/0/137                                                    |
| Goodness-of-fit on F <sup>2</sup>           | 1.039                                                         |
| Final R indexes [I ≥ 2σ (I)]                | R <sub>1</sub> = 0.0831, wR <sub>2</sub> = 0.2290             |
| Final R indexes [all data]                  | R <sub>1</sub> = 0.0909, wR <sub>2</sub> = 0.2457             |
| Largest diff. peak/hole / e Å <sup>-3</sup> | 0.56/-0.36                                                    |
| Flack parameter                             | 0.04(4)                                                       |

## 8. $^1\text{H}$ , $^{13}\text{C}$ and $^{19}\text{F}$ NMR spectra.

### NMR spectra of crude products

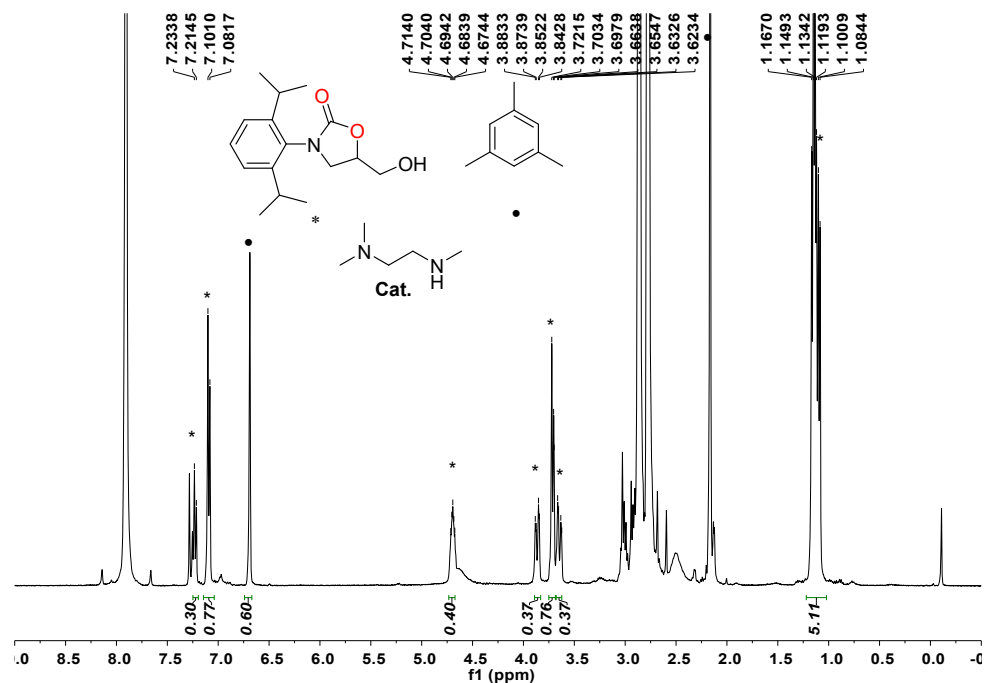

$^1\text{H}$  NMR spectrum for reaction of **1v** and  $\text{CO}_2$  (conditions in Table S4, entry 1; 0.200 mmol internal standard,  $\text{CDCl}_3$ , 400 MHz)

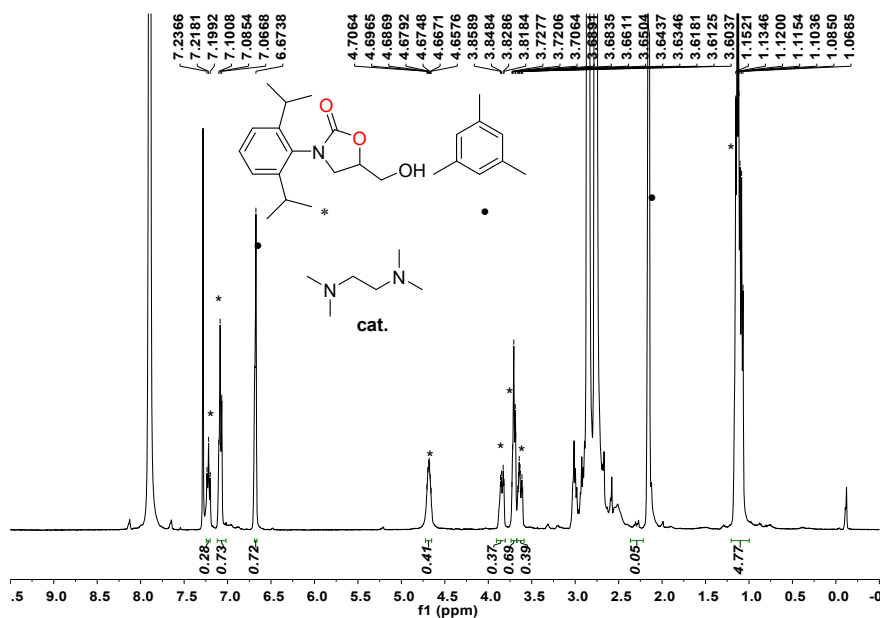

$^1\text{H}$  NMR spectrum for reaction of **1v** and  $\text{CO}_2$  (conditions in Table S4, entry 2; 0.240 mmol internal standard,  $\text{CDCl}_3$ , 400 MHz)



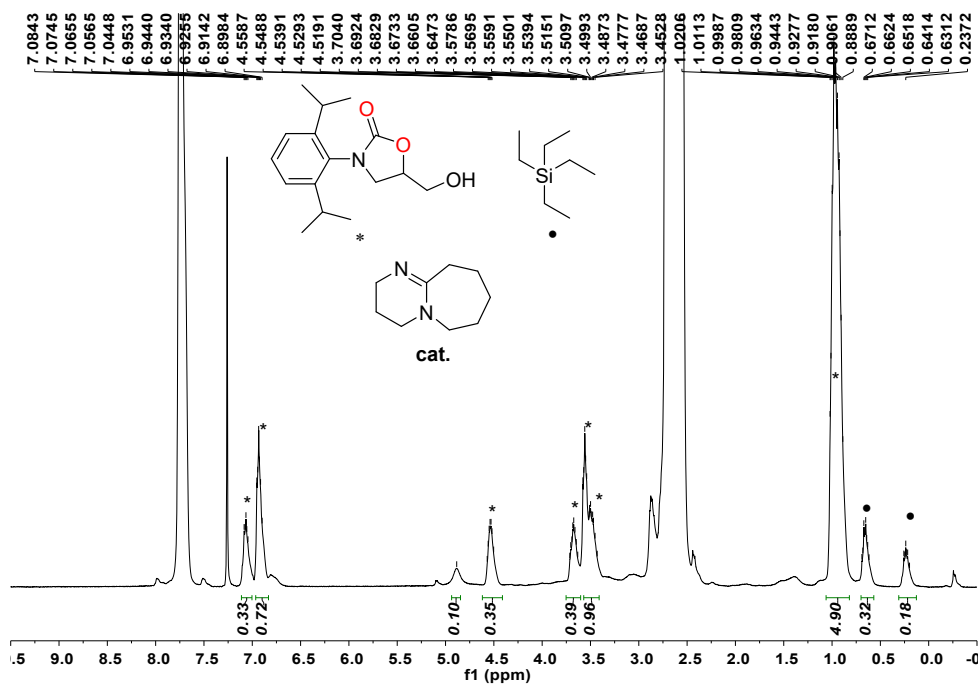

$^1\text{H}$  NMR spectrum for reaction of **1v** and  $\text{CO}_2$  (conditions in Table S4, entry 5; 0.023 mmol internal standard,  $\text{CDCl}_3$ , 400 MHz)

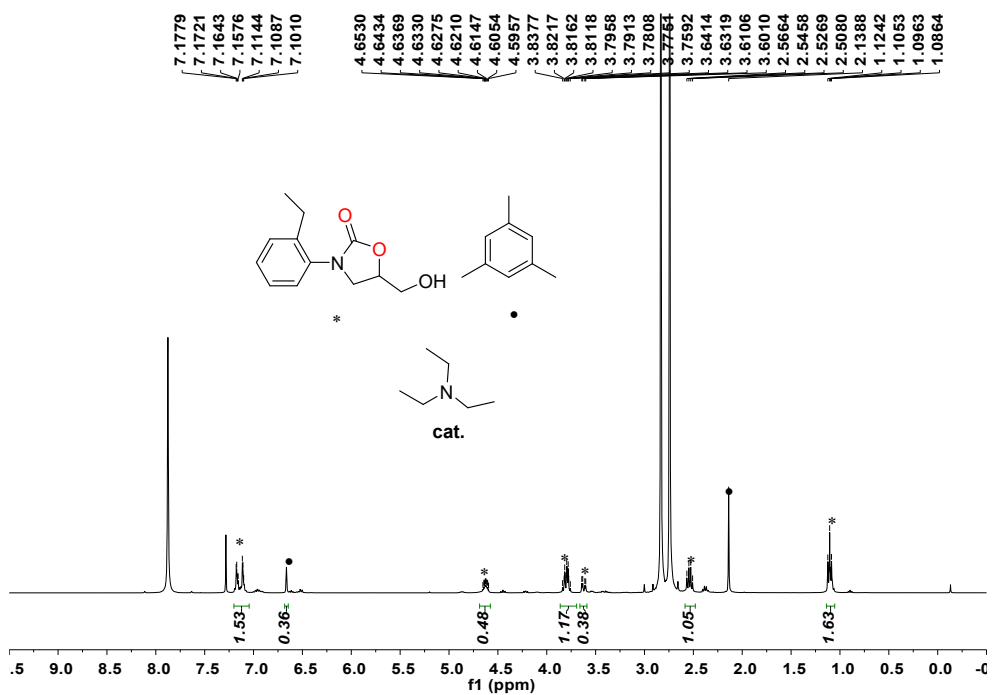

$^1\text{H}$  NMR spectrum for reaction of **1m** and  $\text{CO}_2$  (conditions in Table S5, entry 1; 0.120 mmol internal standard,  $\text{CDCl}_3$ , 400 MHz)

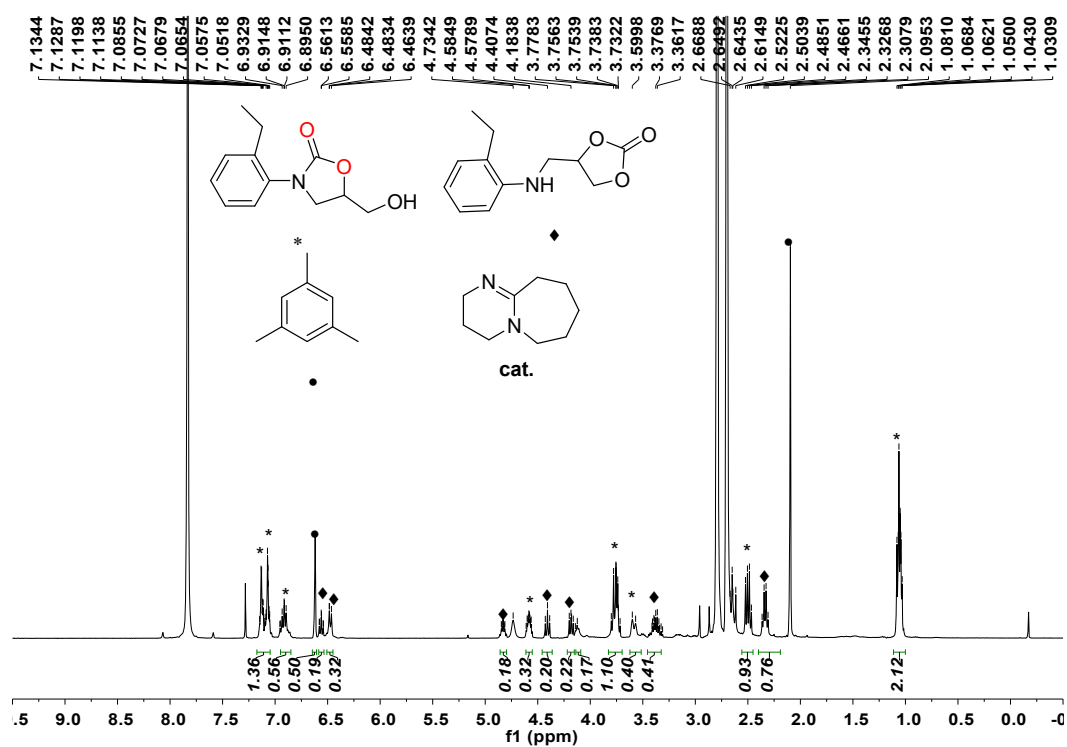

$^1\text{H}$  NMR spectrum for reaction of **1m** and  $\text{CO}_2$  (conditions in Table S5, entry 2; 0.168 mmol internal standard,  $\text{CDCl}_3$ , 400 MHz)

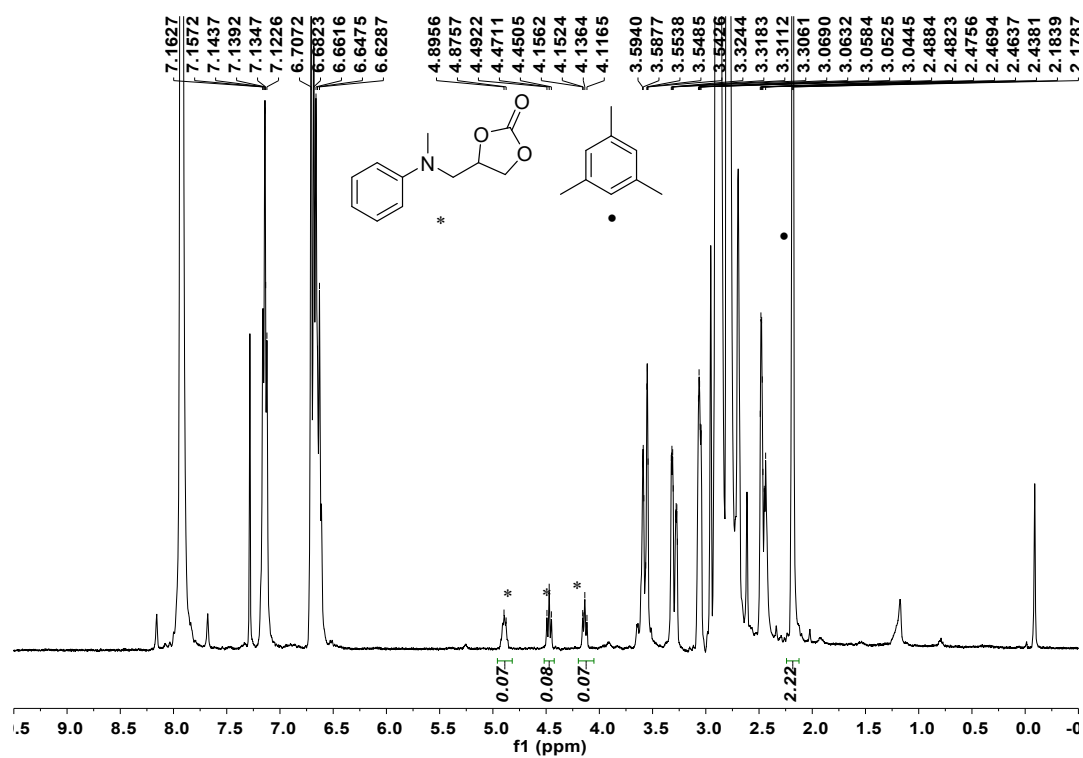

$^1\text{H}$  NMR spectrum for reaction of *N*-methyl-*N*-(oxiran-2-ylmethyl)aniline and  $\text{CO}_2$  (120 °C, 0.247 mmol internal standard,  $\text{CDCl}_3$ , 400 MHz)

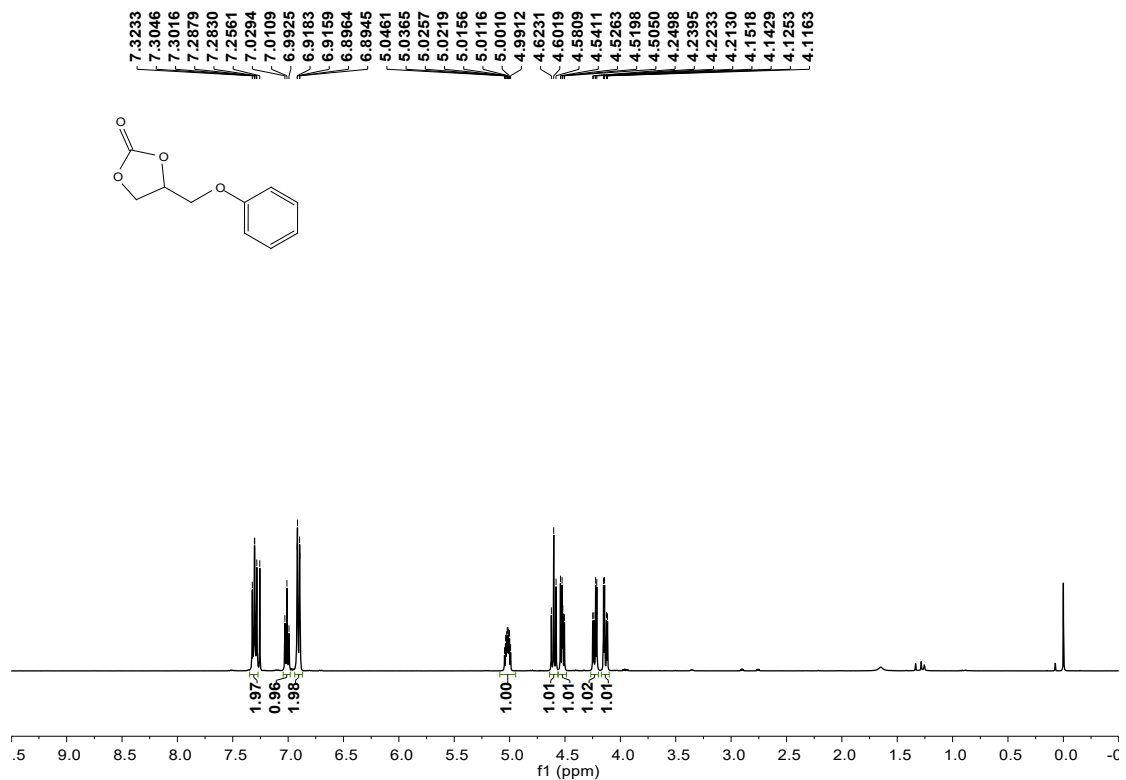

<sup>1</sup>H NMR spectrum of 4-(phenoxy)methyl-1,3-dioxolan-2-one (CDCl<sub>3</sub>, 400 MHz)

### NMR spectra of epoxy amines

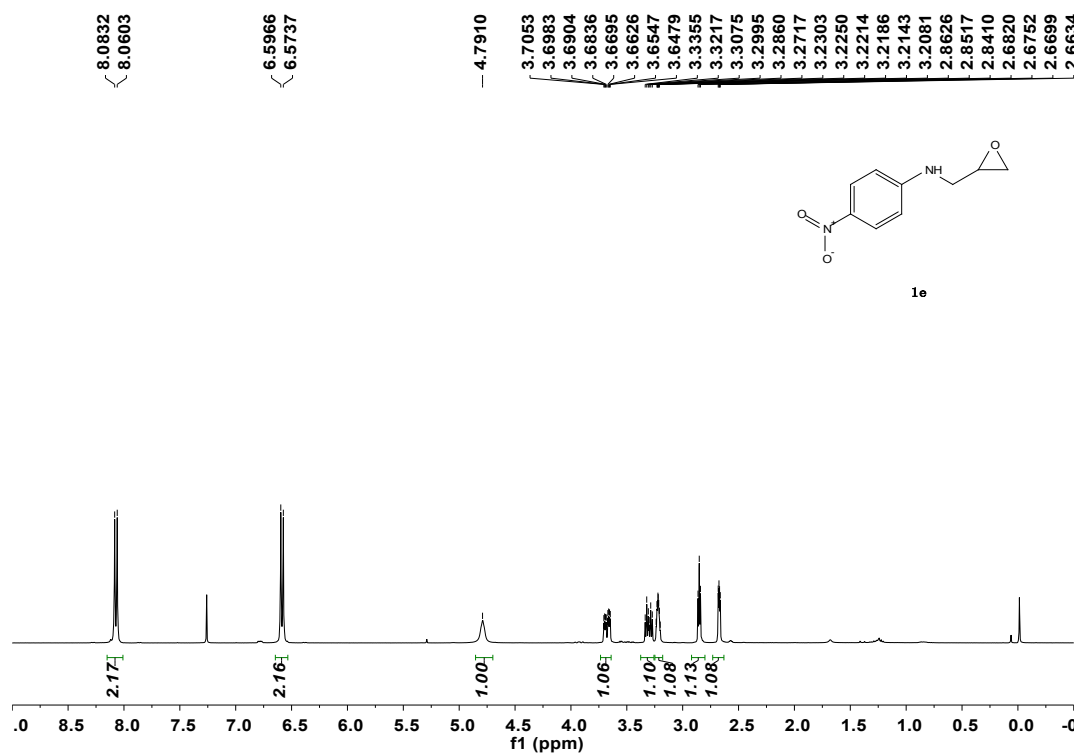

<sup>1</sup>H NMR spectrum (CDCl<sub>3</sub>, 400 MHz) of **1e**

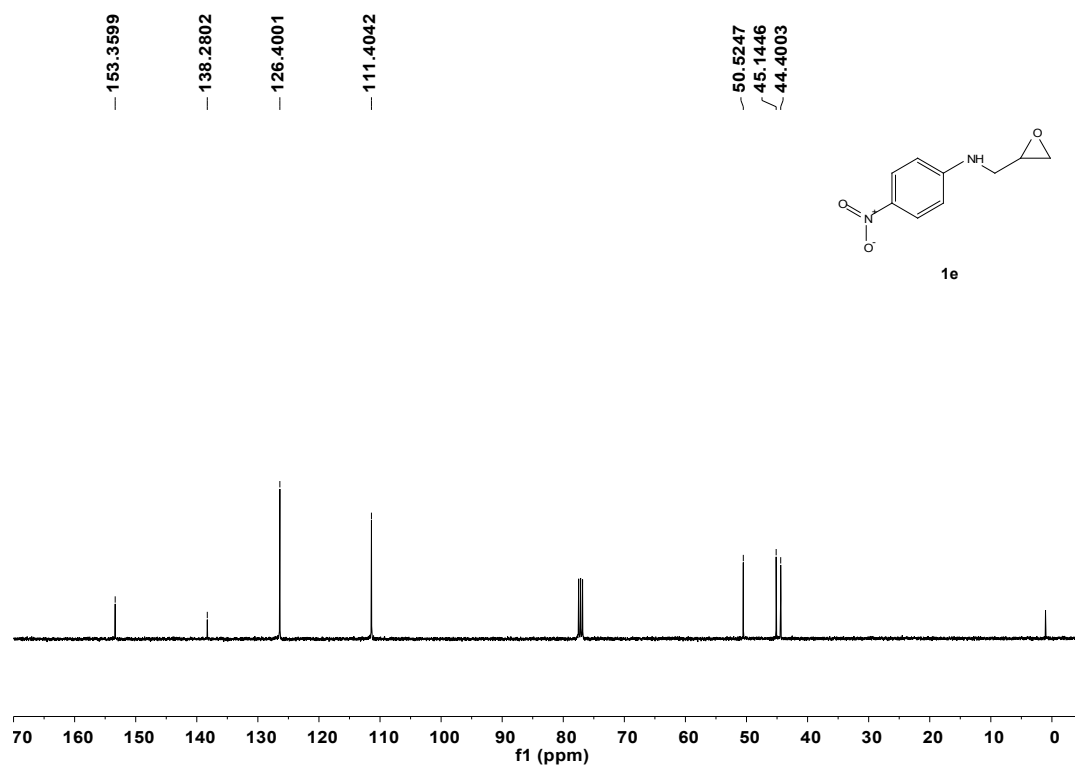

<sup>13</sup>C NMR spectrum (CDCl<sub>3</sub>, 101 MHz) of **1e**

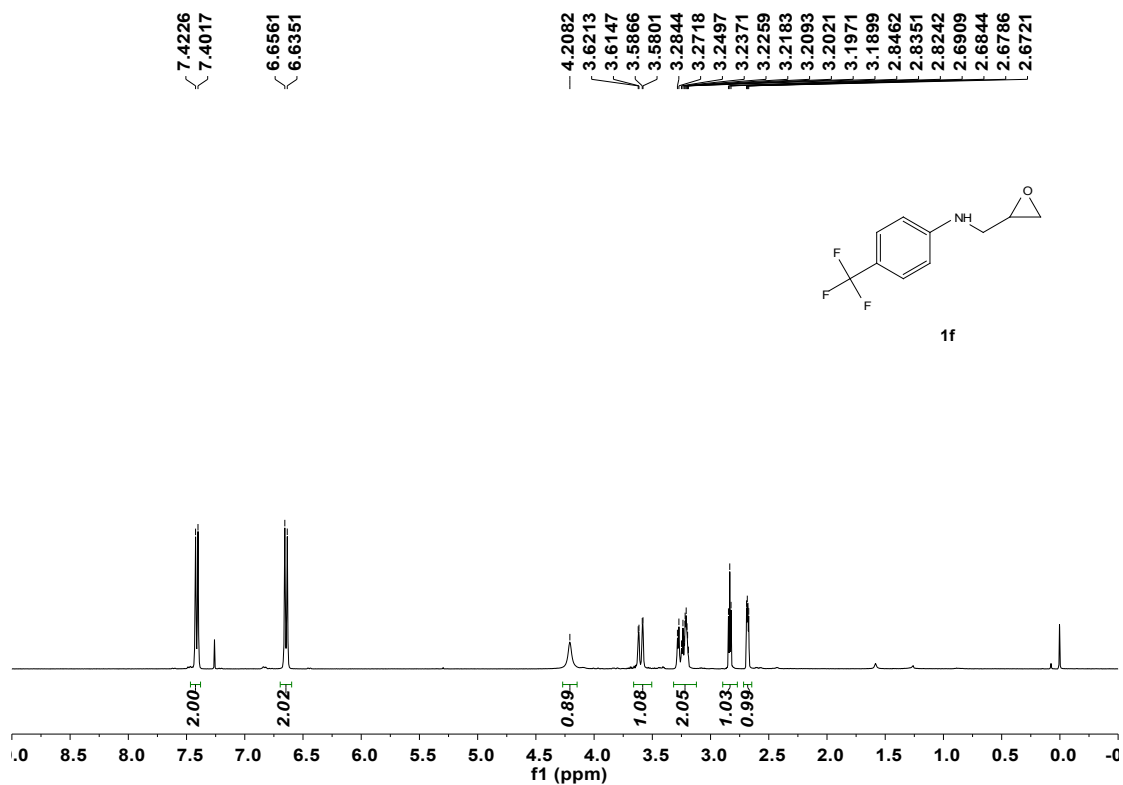

<sup>1</sup>H NMR spectrum (CDCl<sub>3</sub>, 400 MHz) of **1f**

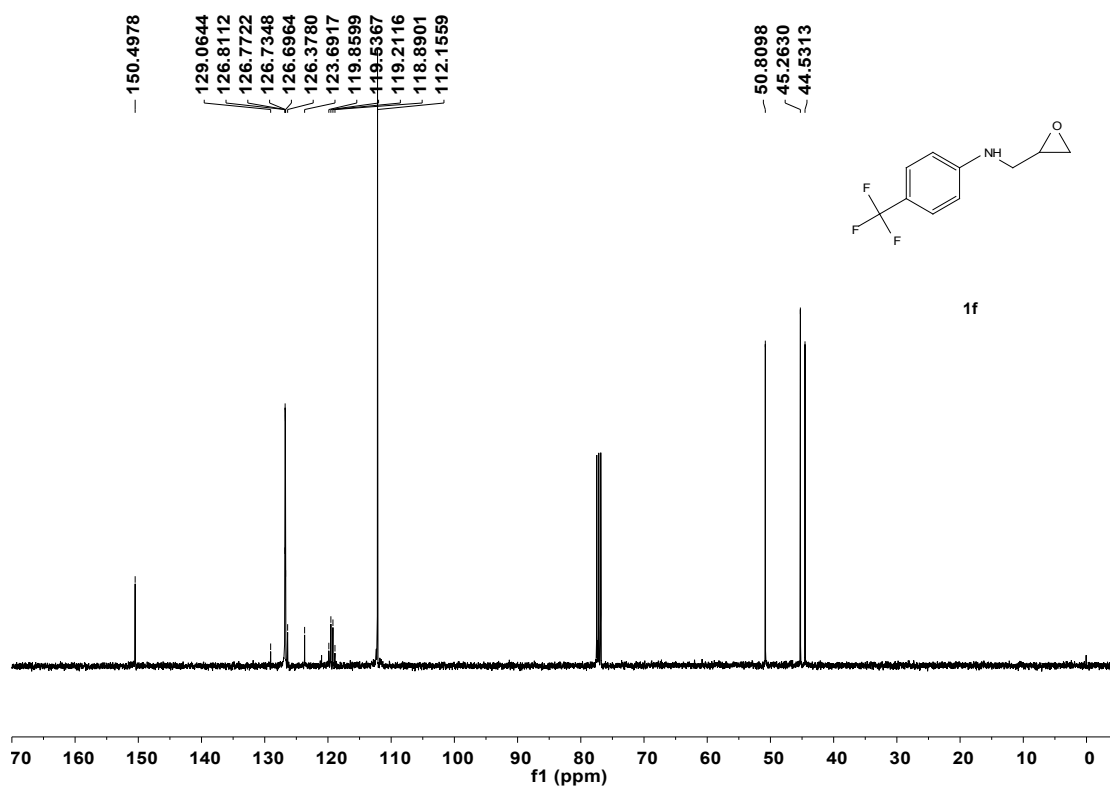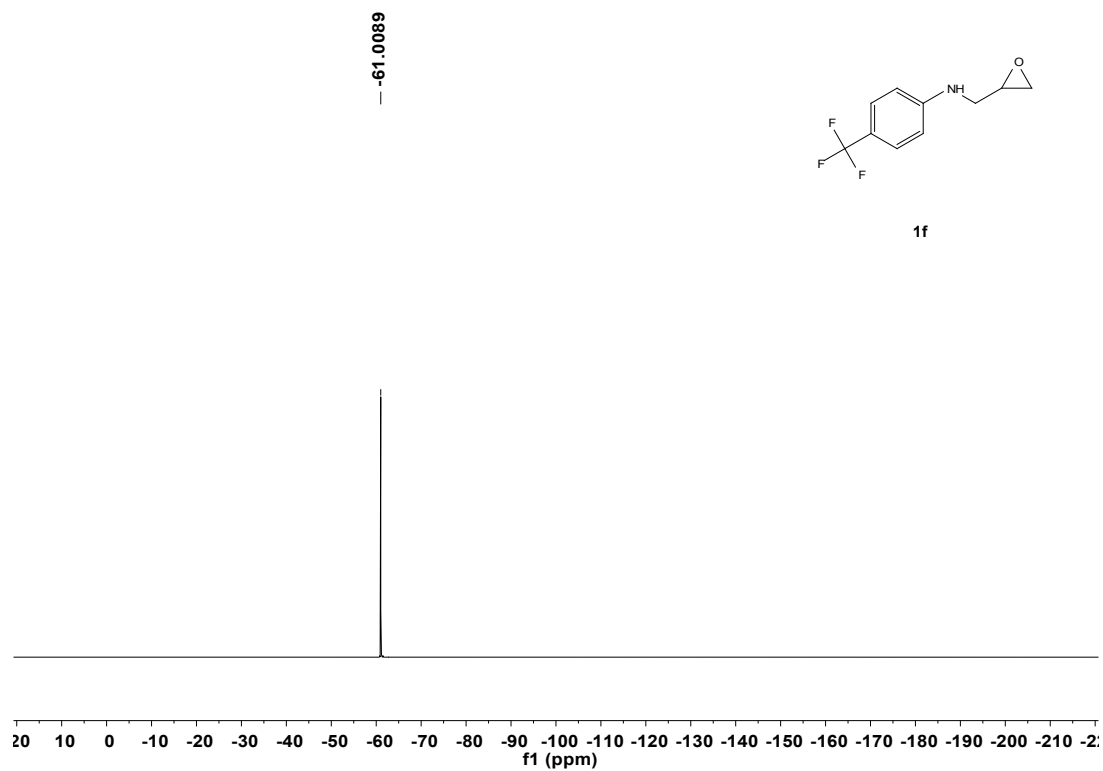



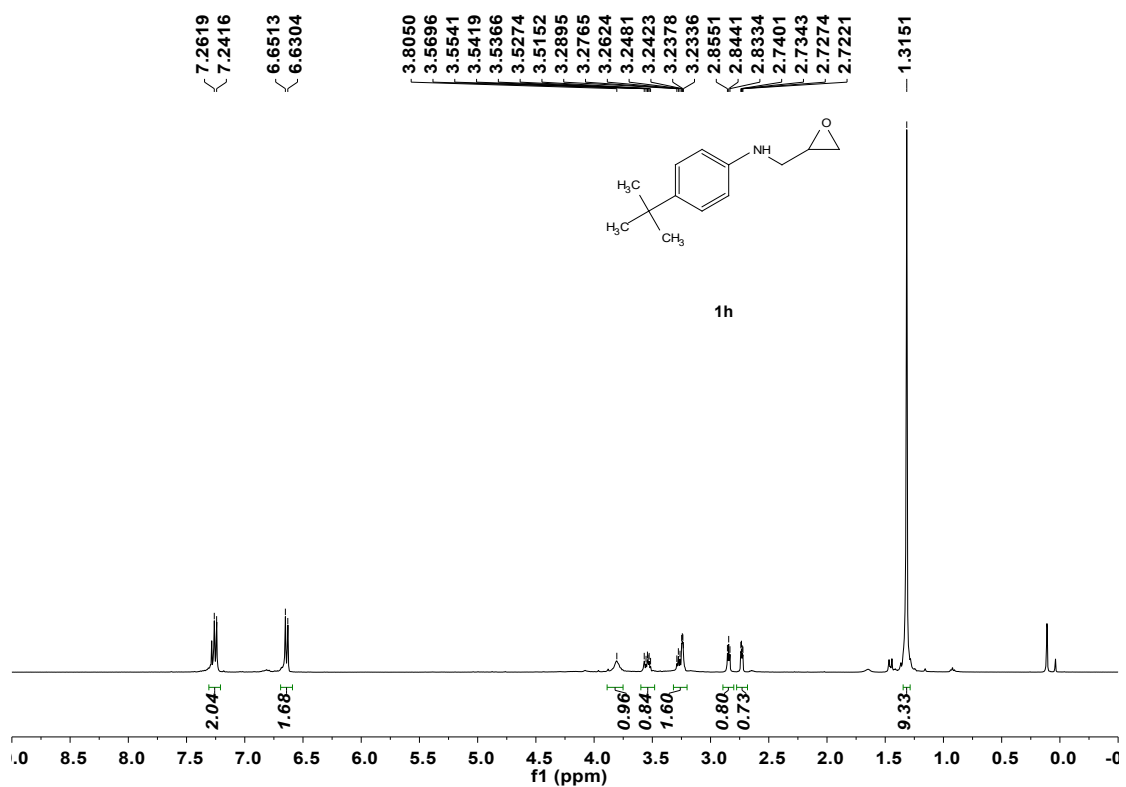

<sup>1</sup>H NMR spectrum (CDCl<sub>3</sub>, 400 MHz) of **1h**

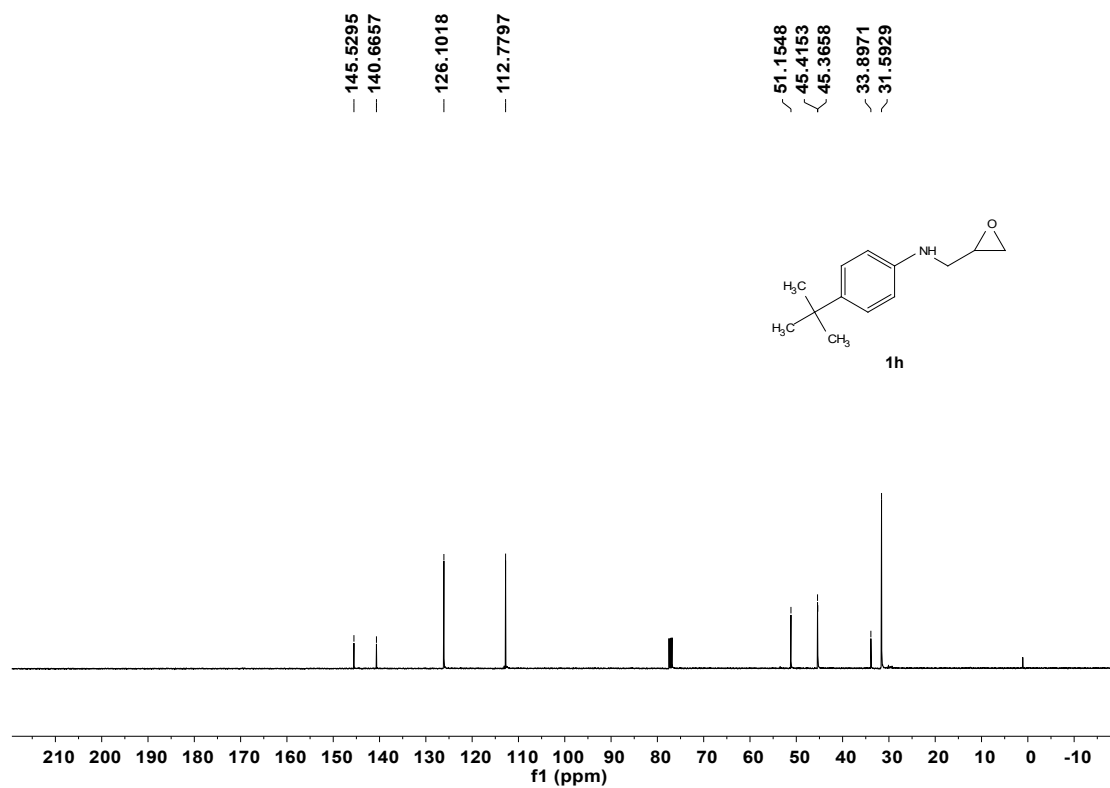

<sup>13</sup>C NMR spectrum (CDCl<sub>3</sub>, 101 MHz) of **1h**

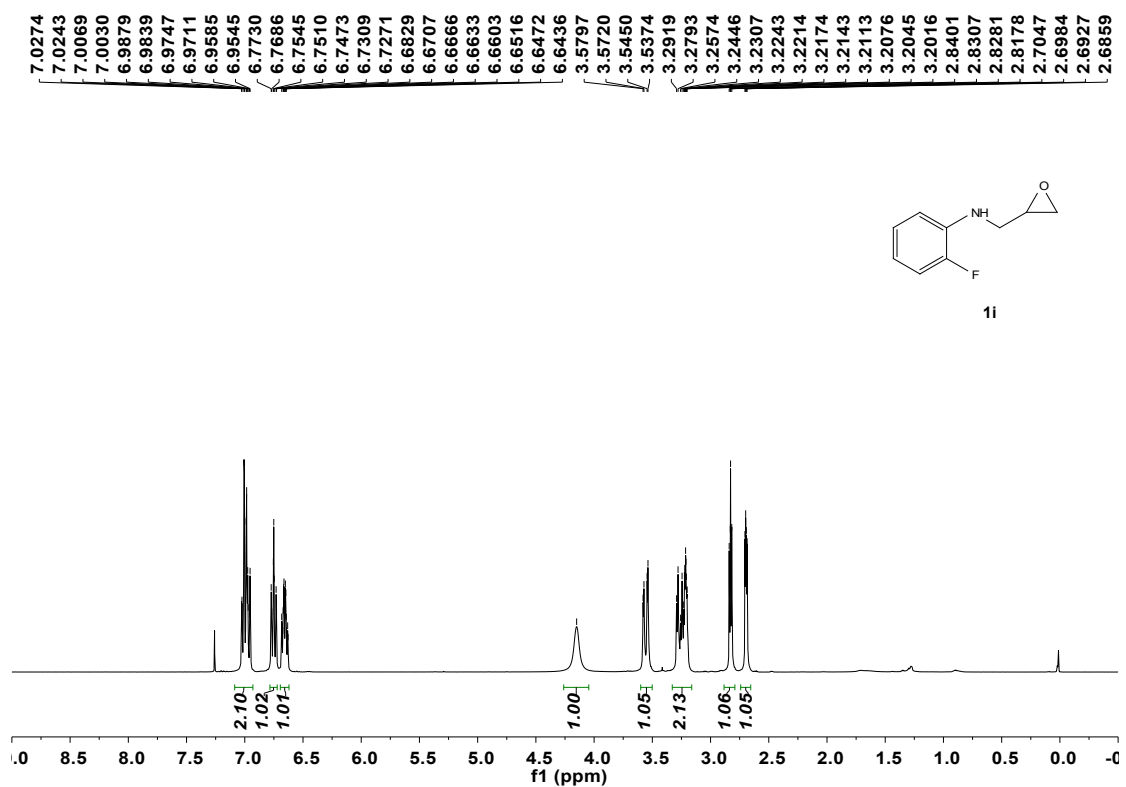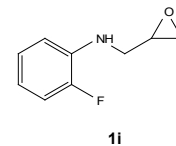

<sup>1</sup>H NMR spectrum (CDCl<sub>3</sub>, 400 MHz) of **1i**

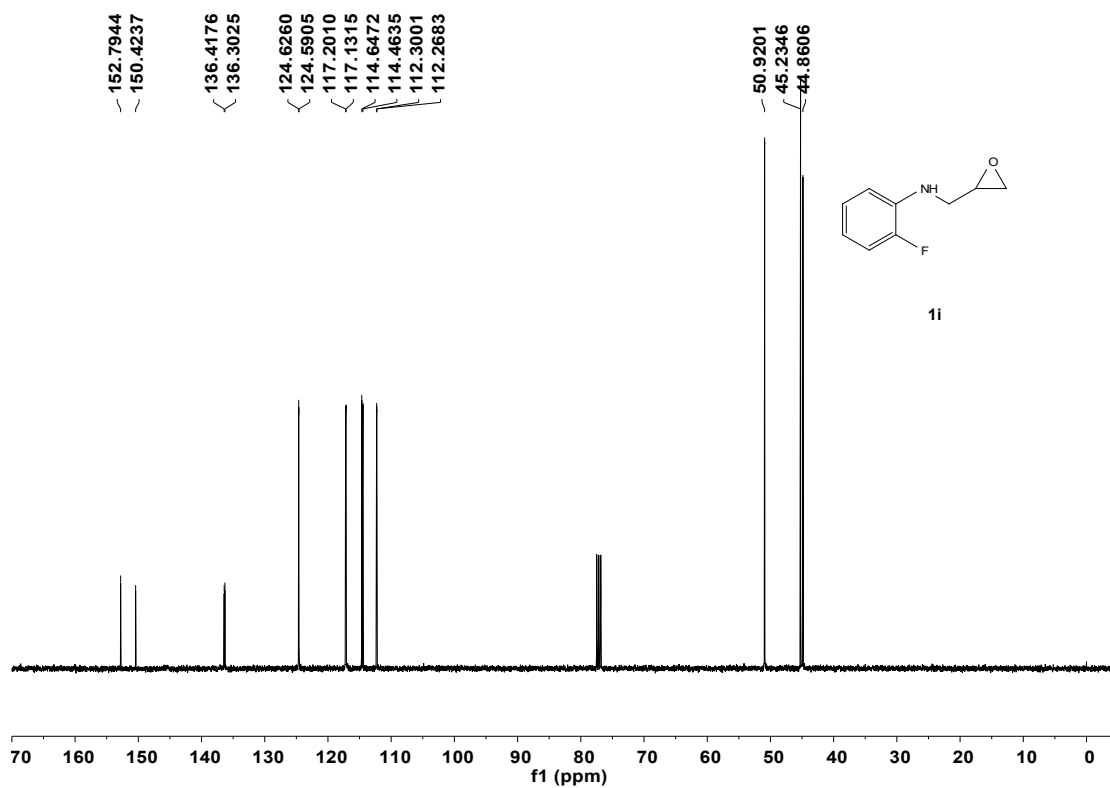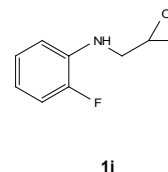

<sup>13</sup>C NMR spectrum (CDCl<sub>3</sub>, 101 MHz) of **1i**

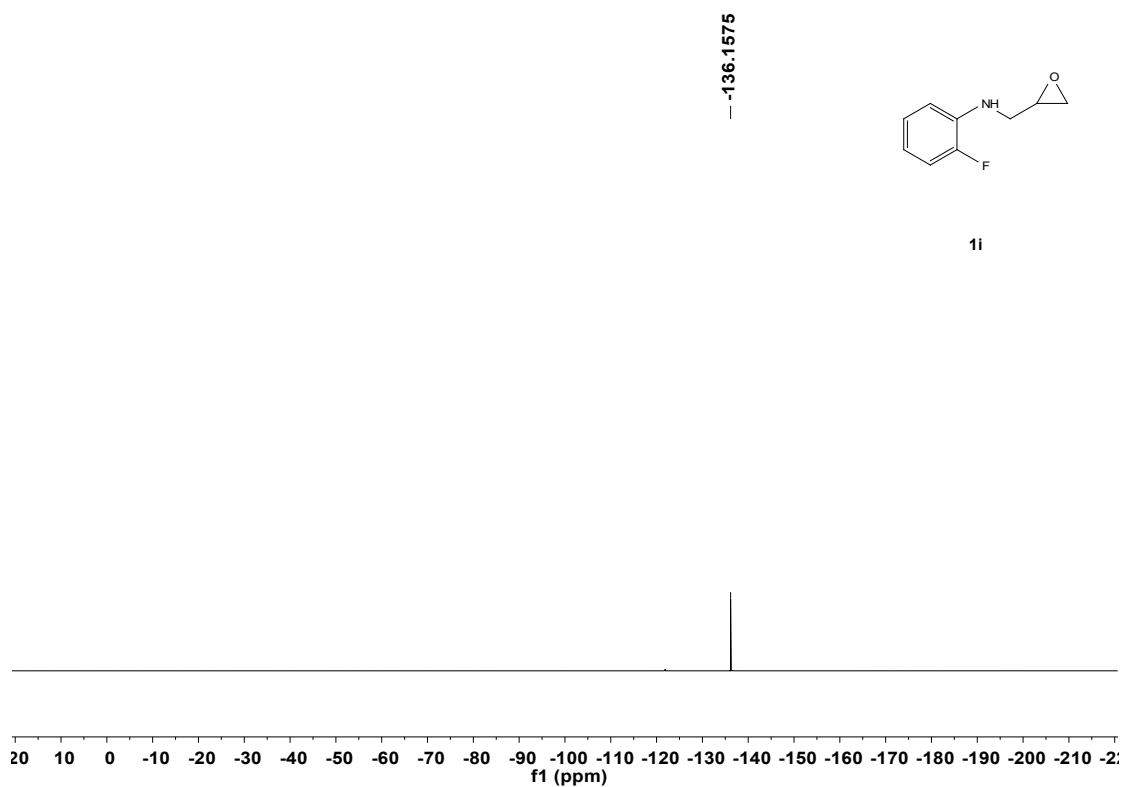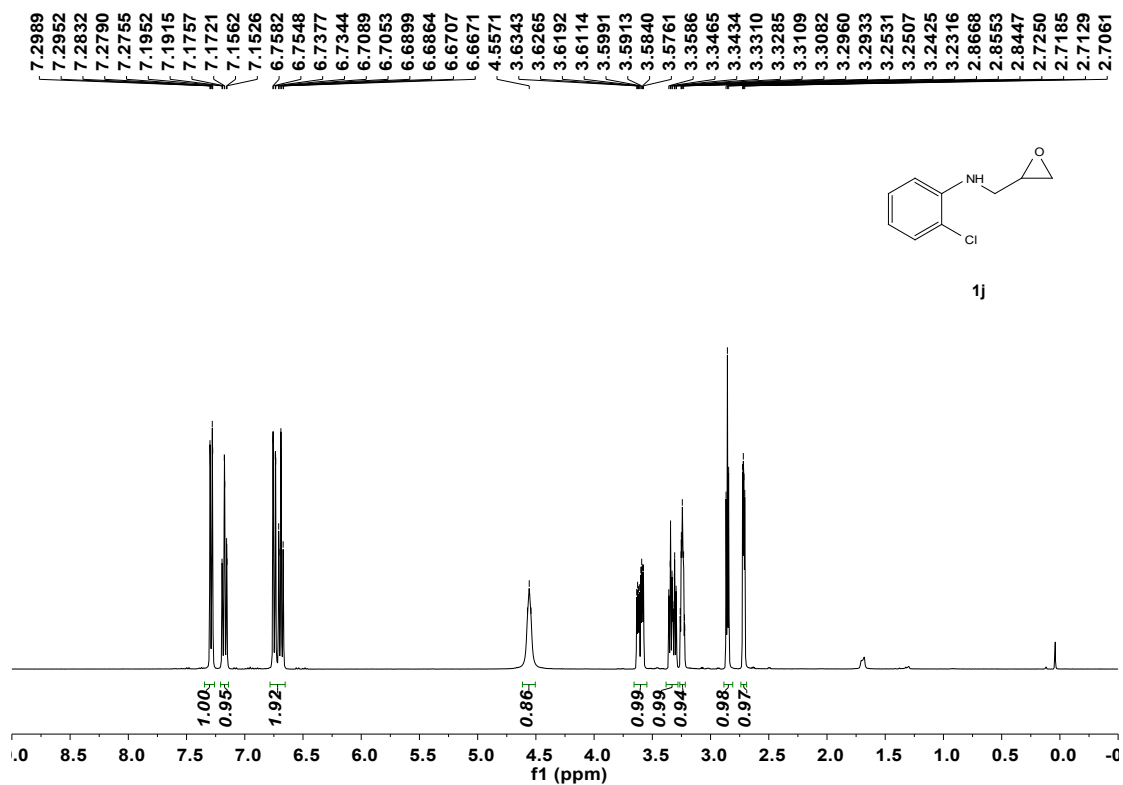

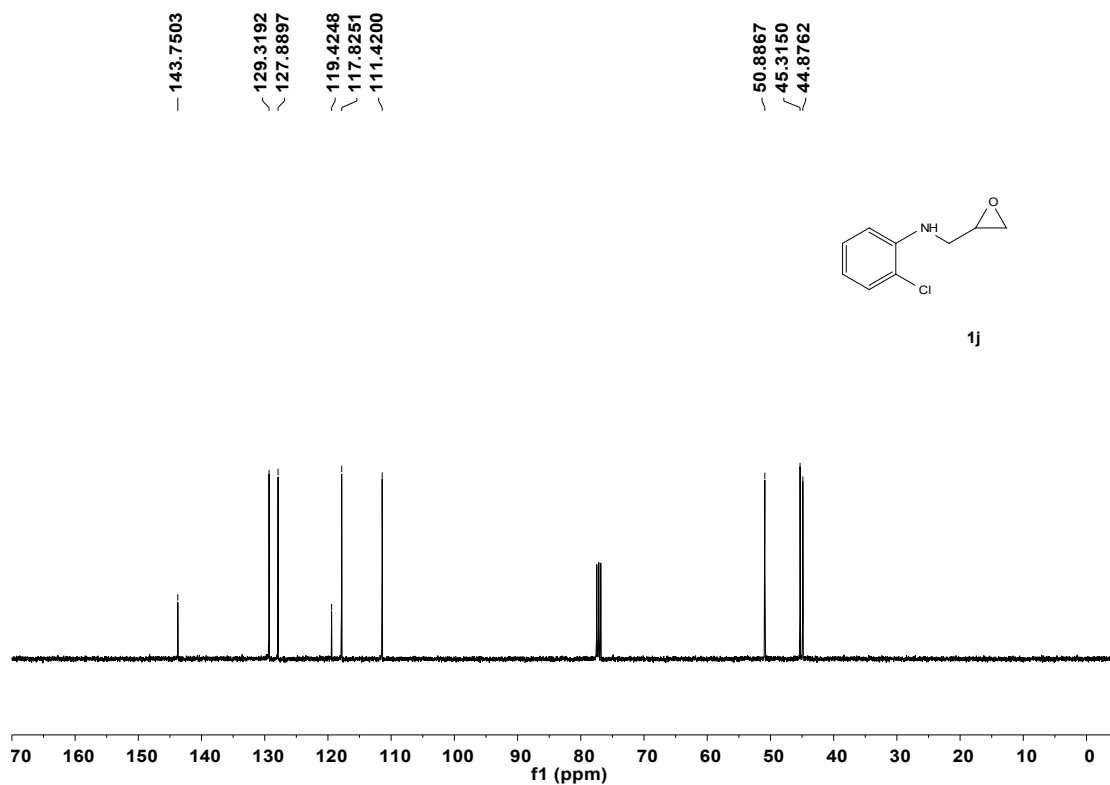

$^{13}\text{C}$  NMR spectrum ( $\text{CDCl}_3$ , 101 MHz) of **1j**

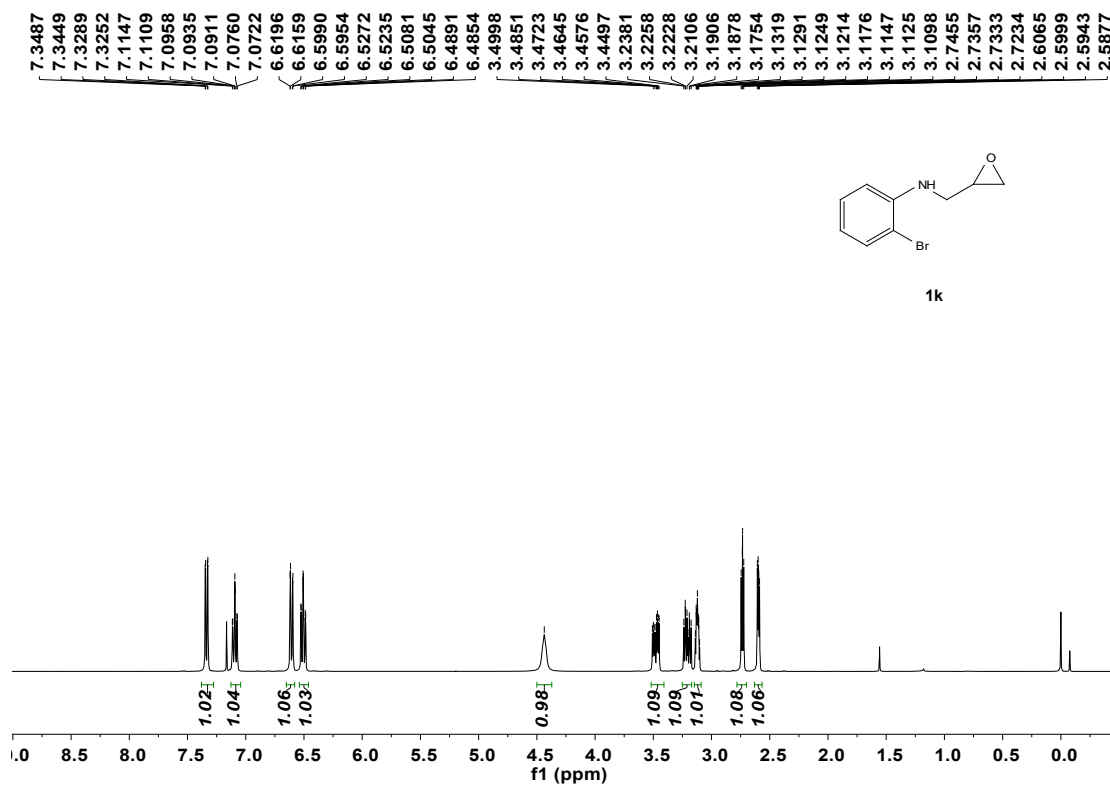

$^1\text{H}$  NMR spectrum ( $\text{CDCl}_3$ , 400 MHz) of **1k**

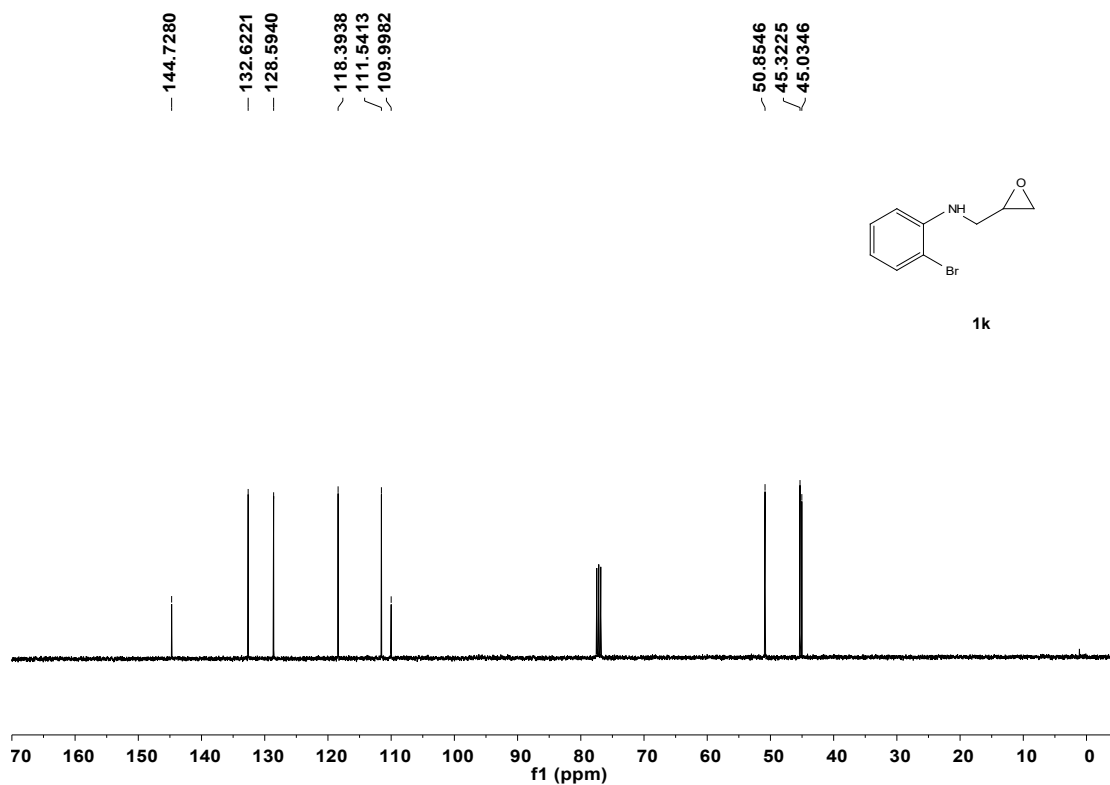

<sup>13</sup>C NMR spectrum (CDCl<sub>3</sub>, 101 MHz) of **1k**

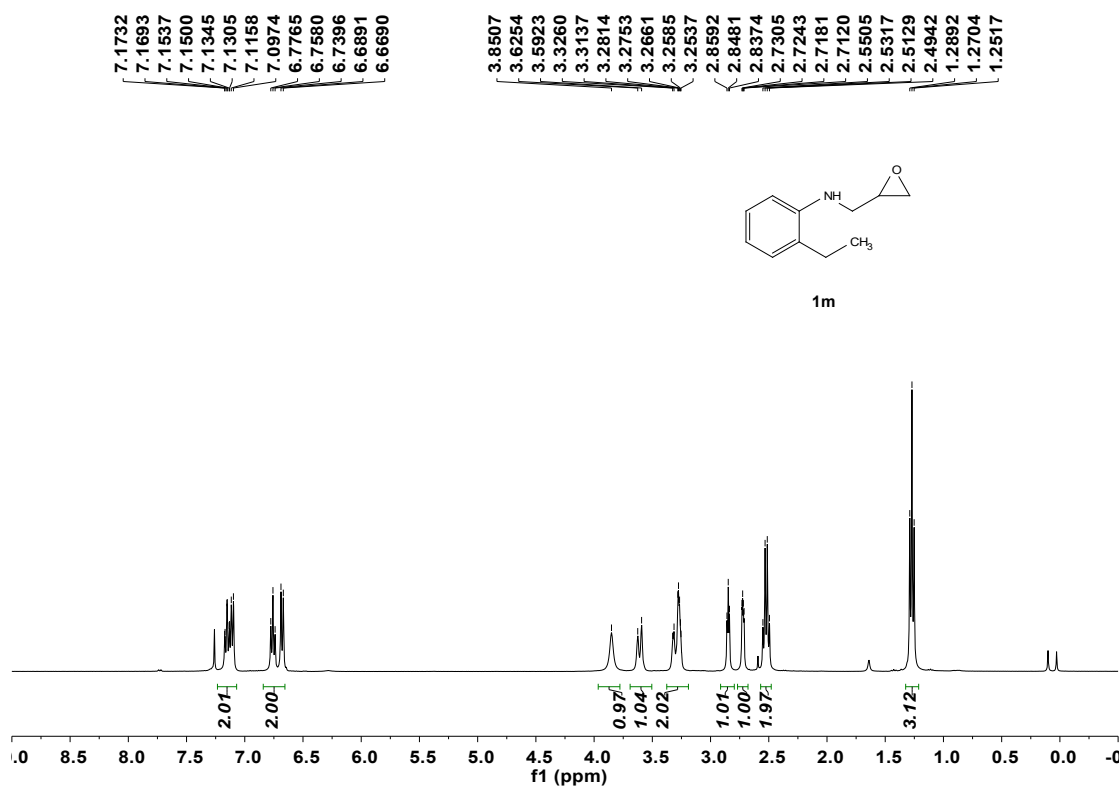

<sup>1</sup>H NMR spectrum (CDCl<sub>3</sub>, 400 MHz) of **1m**

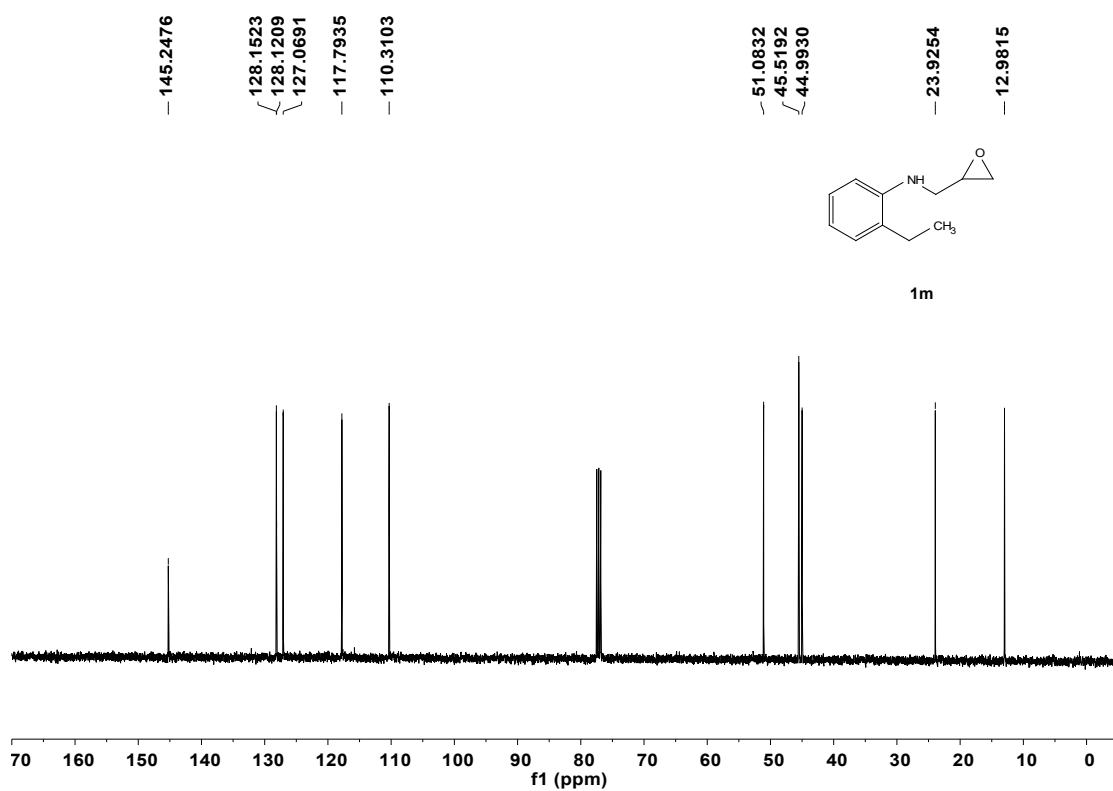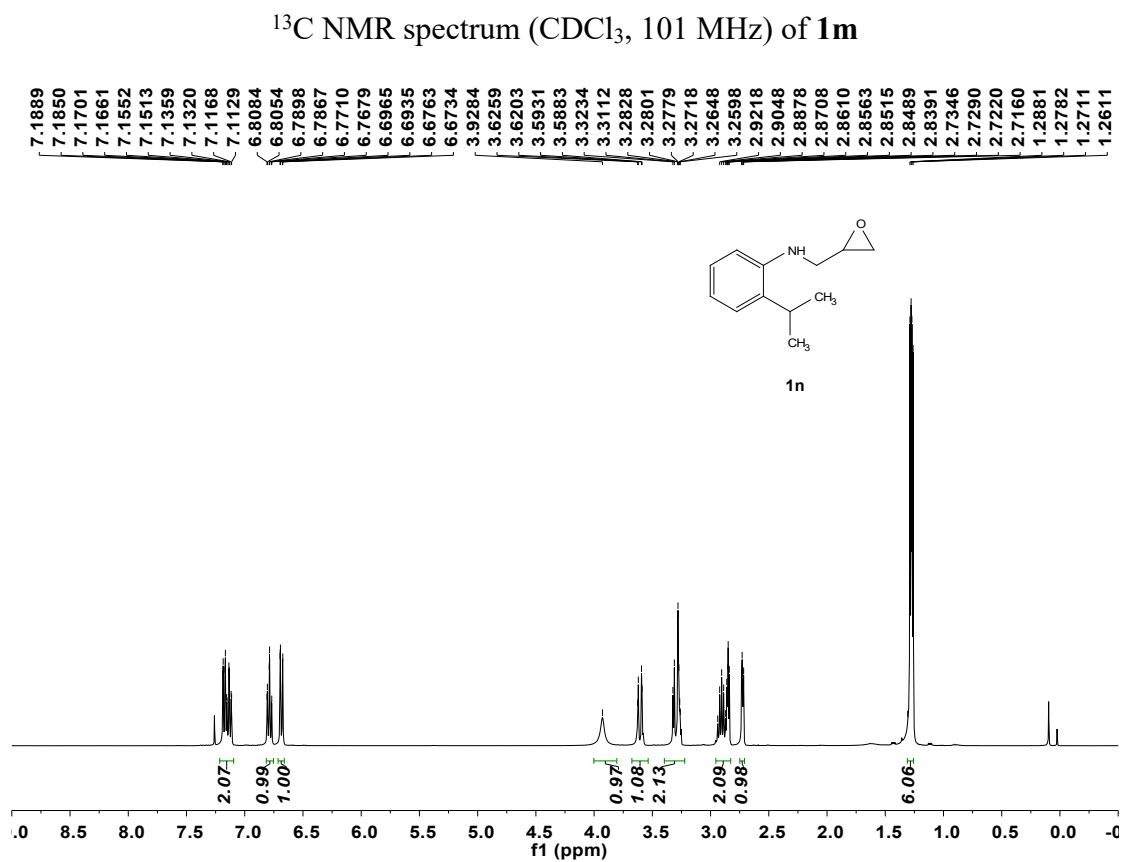

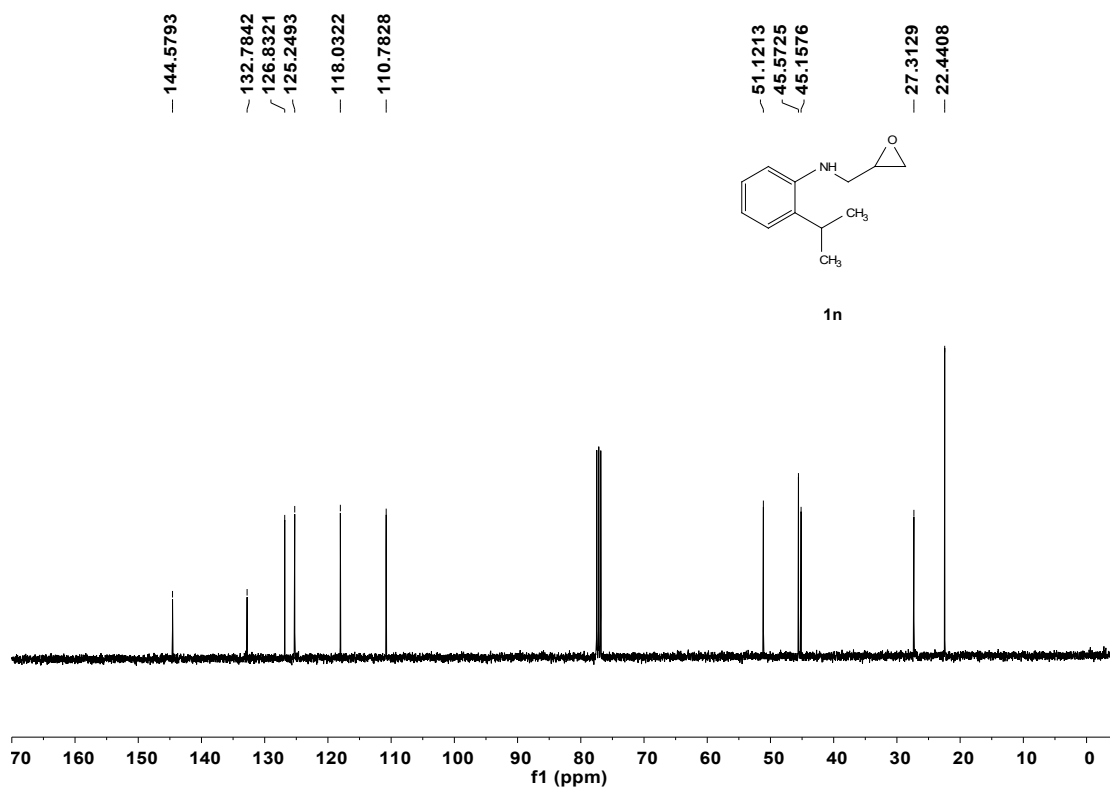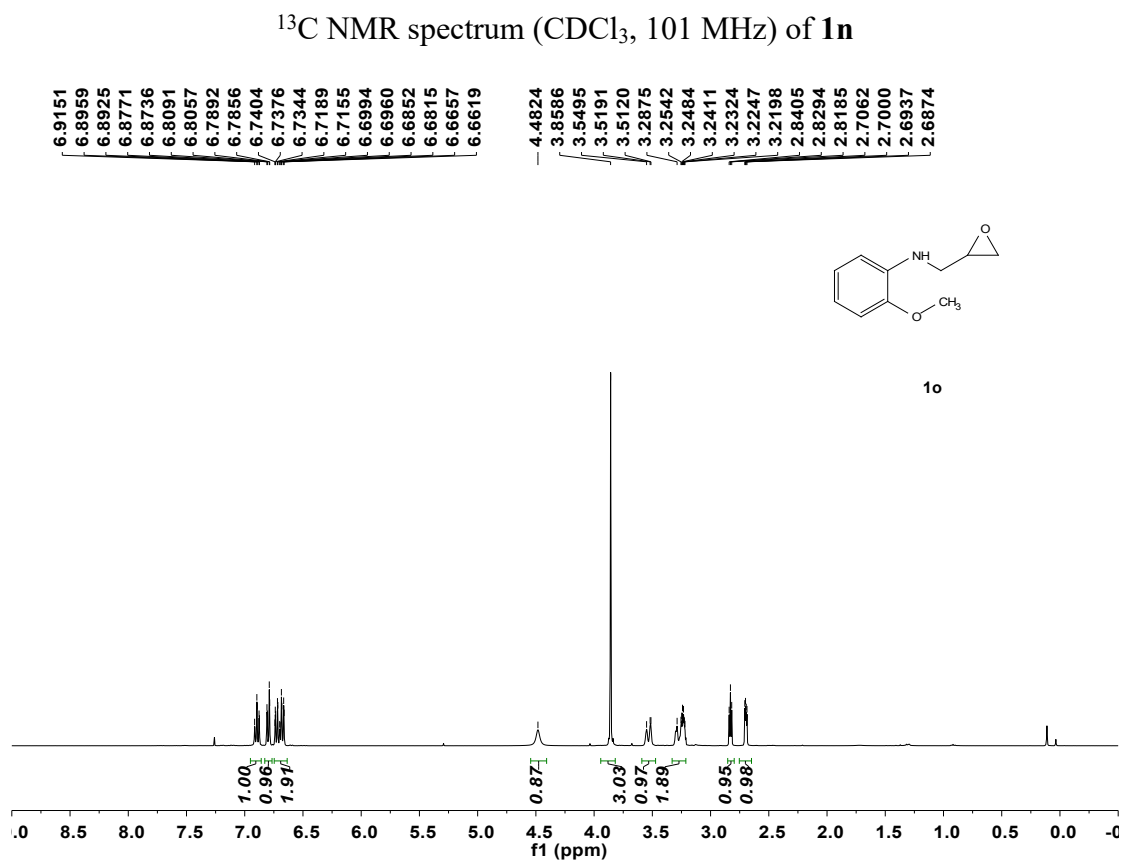

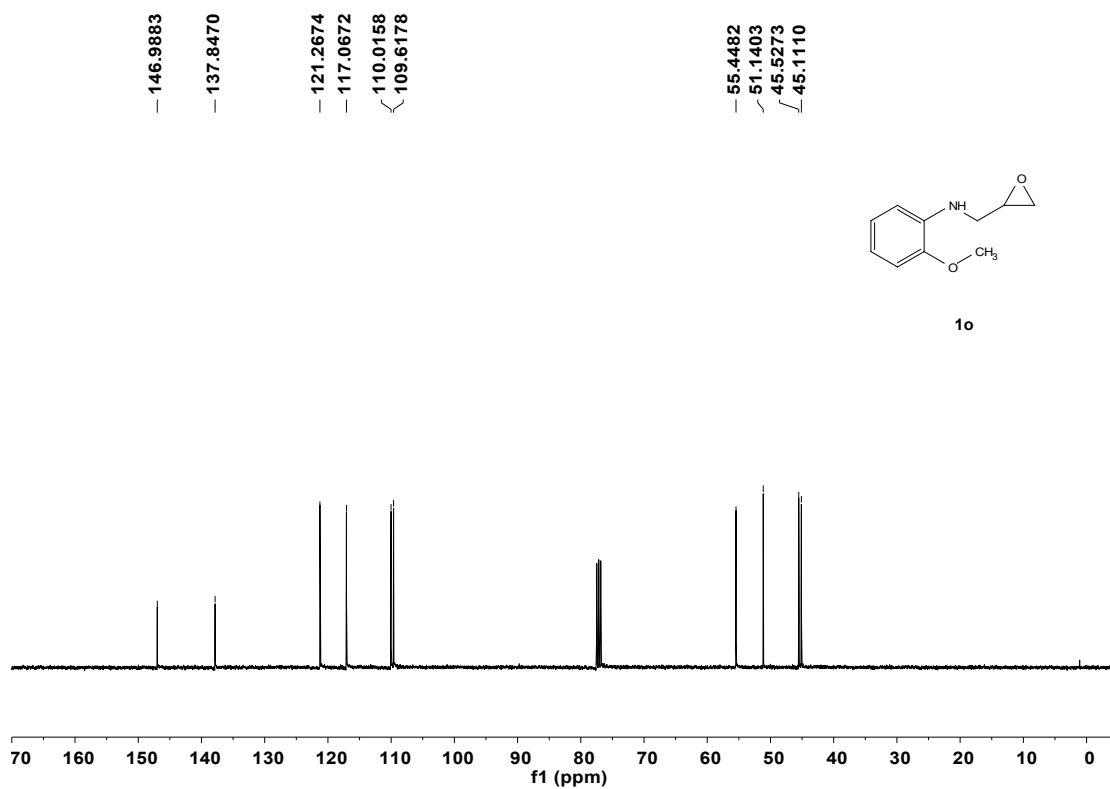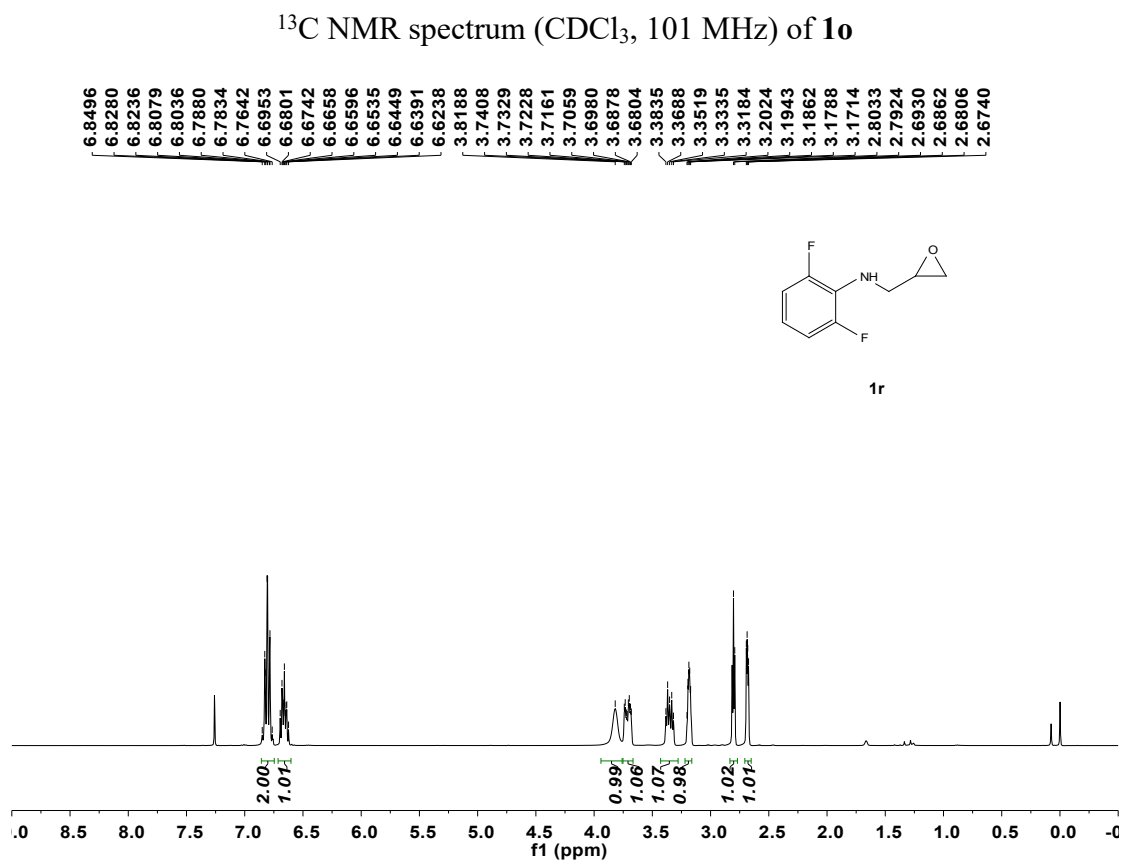



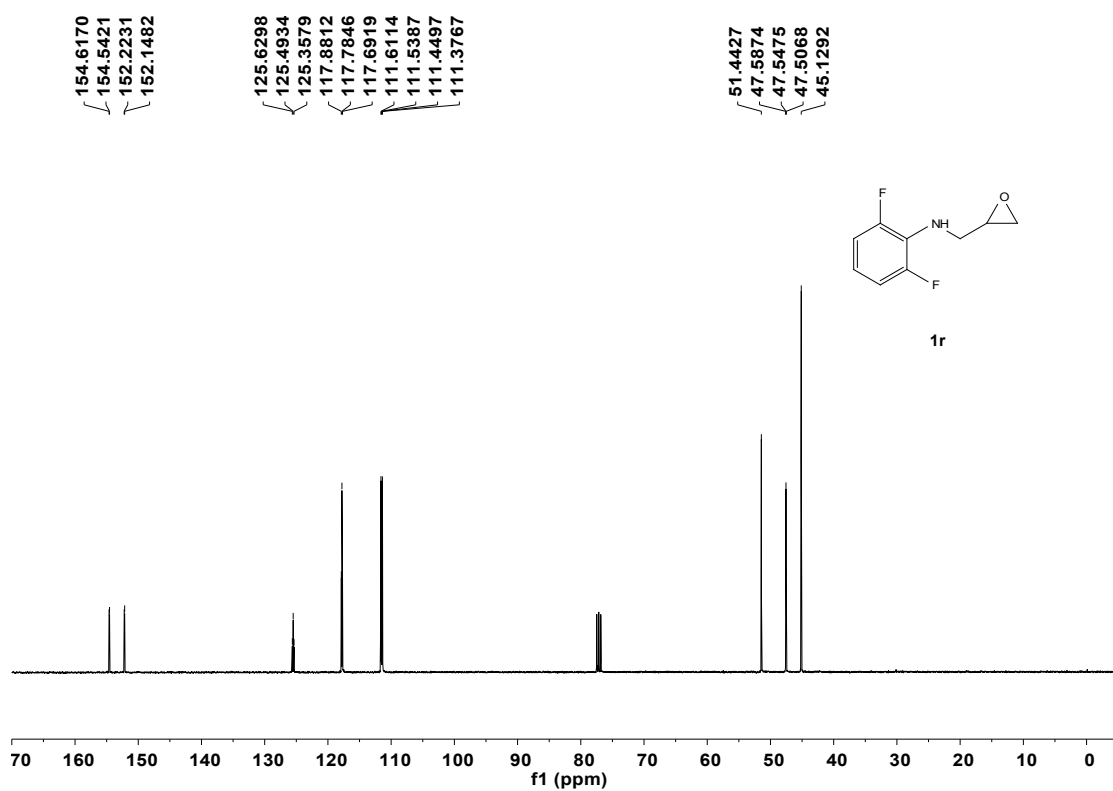

<sup>13</sup>C NMR spectrum (CDCl<sub>3</sub>, 101 MHz) of **1r**

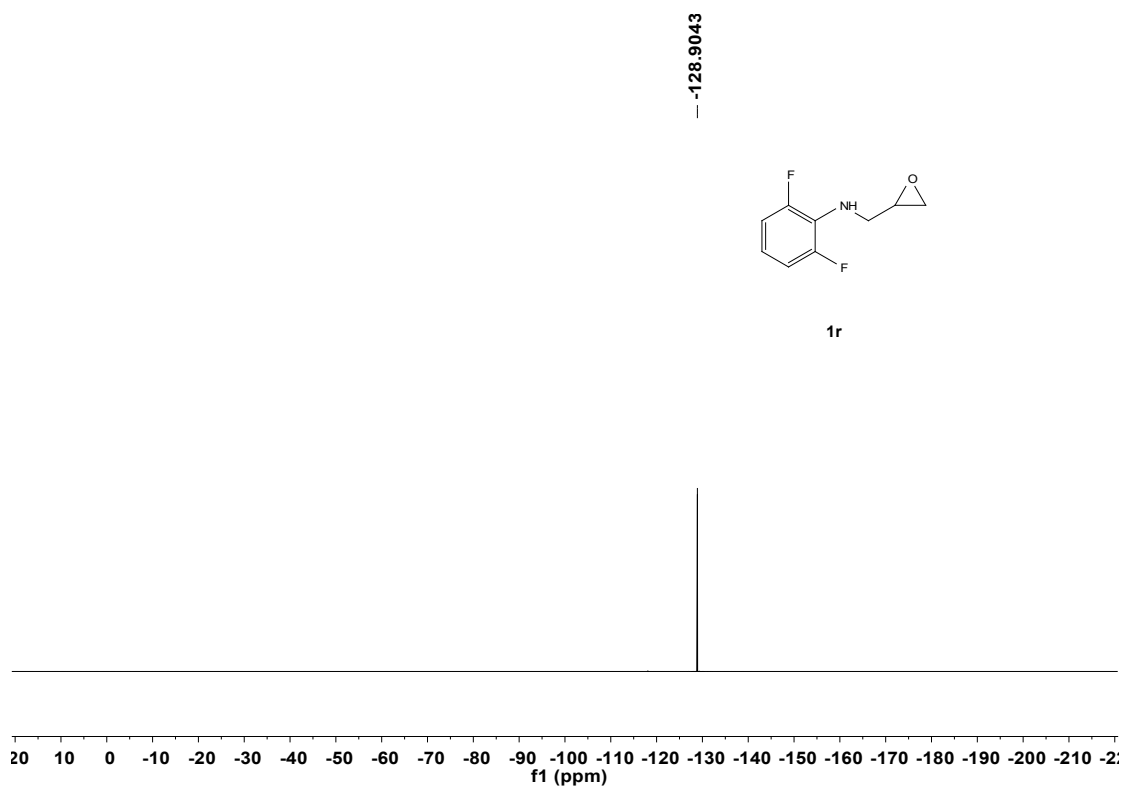

<sup>19</sup>F NMR spectrum (CDCl<sub>3</sub>, 376 MHz) of **1r**

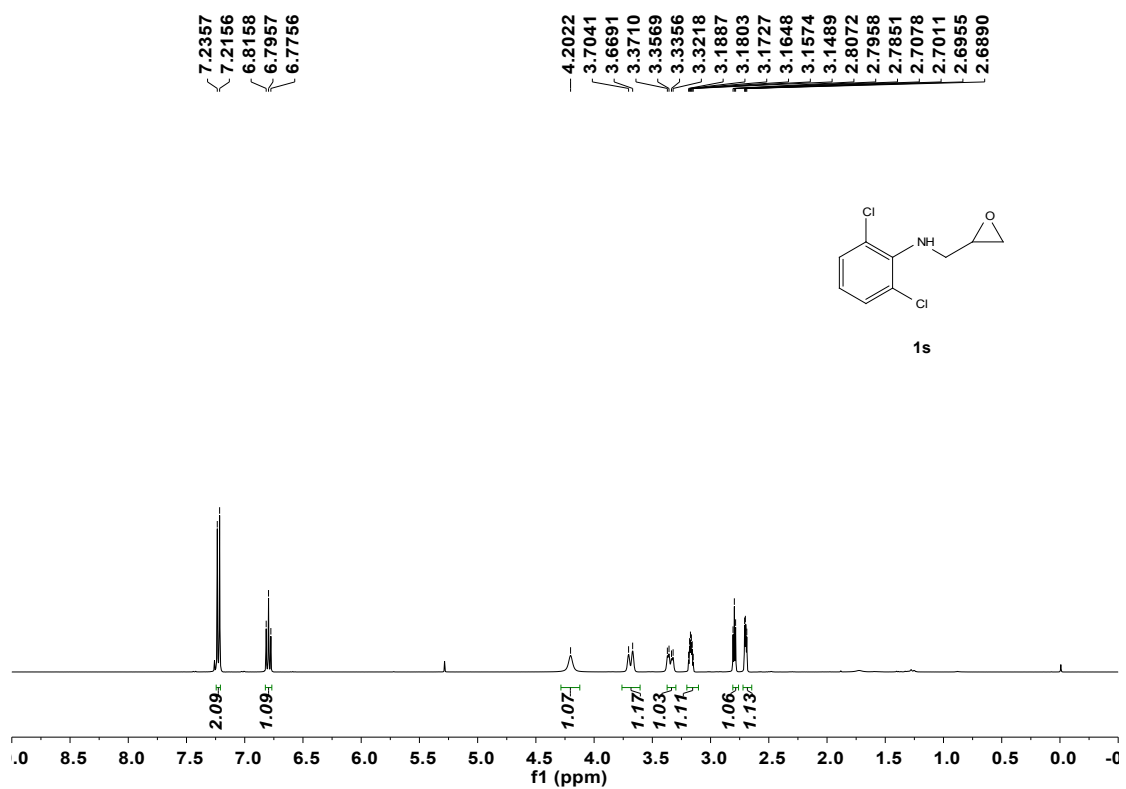

<sup>1</sup>H NMR spectrum (CDCl<sub>3</sub>, 400 MHz) of **1s**

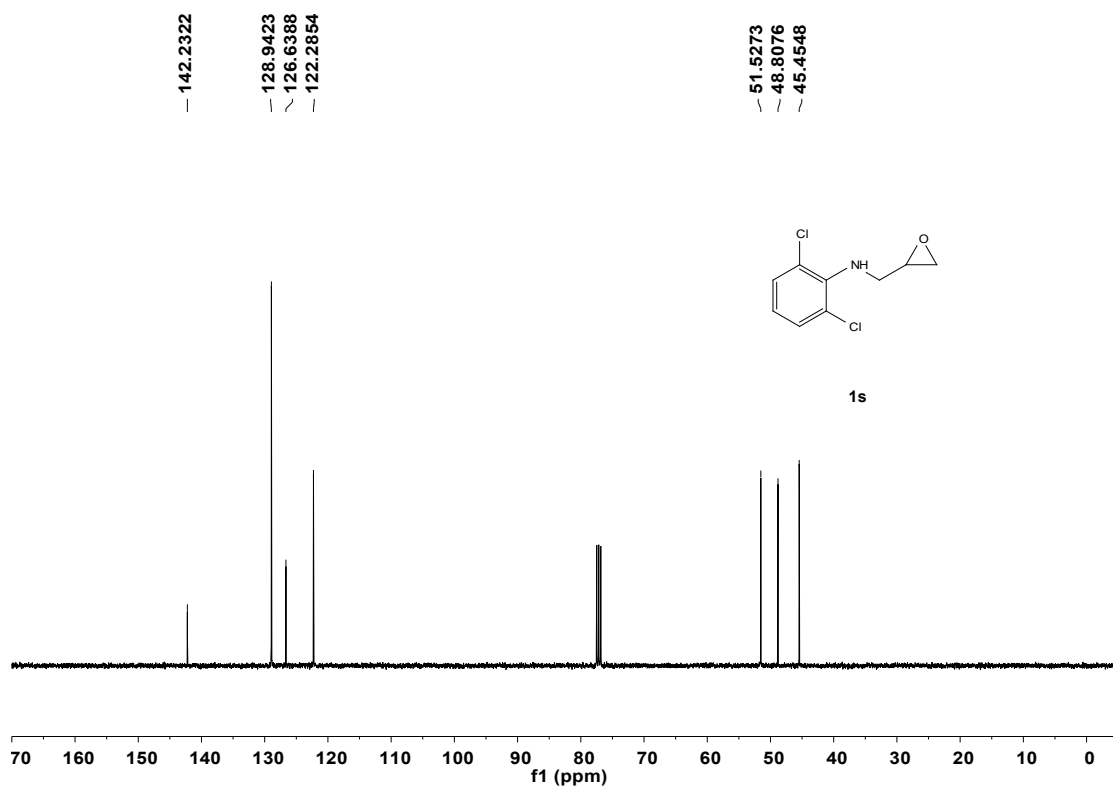

<sup>13</sup>C NMR spectrum (CDCl<sub>3</sub>, 101 MHz) of **1s**

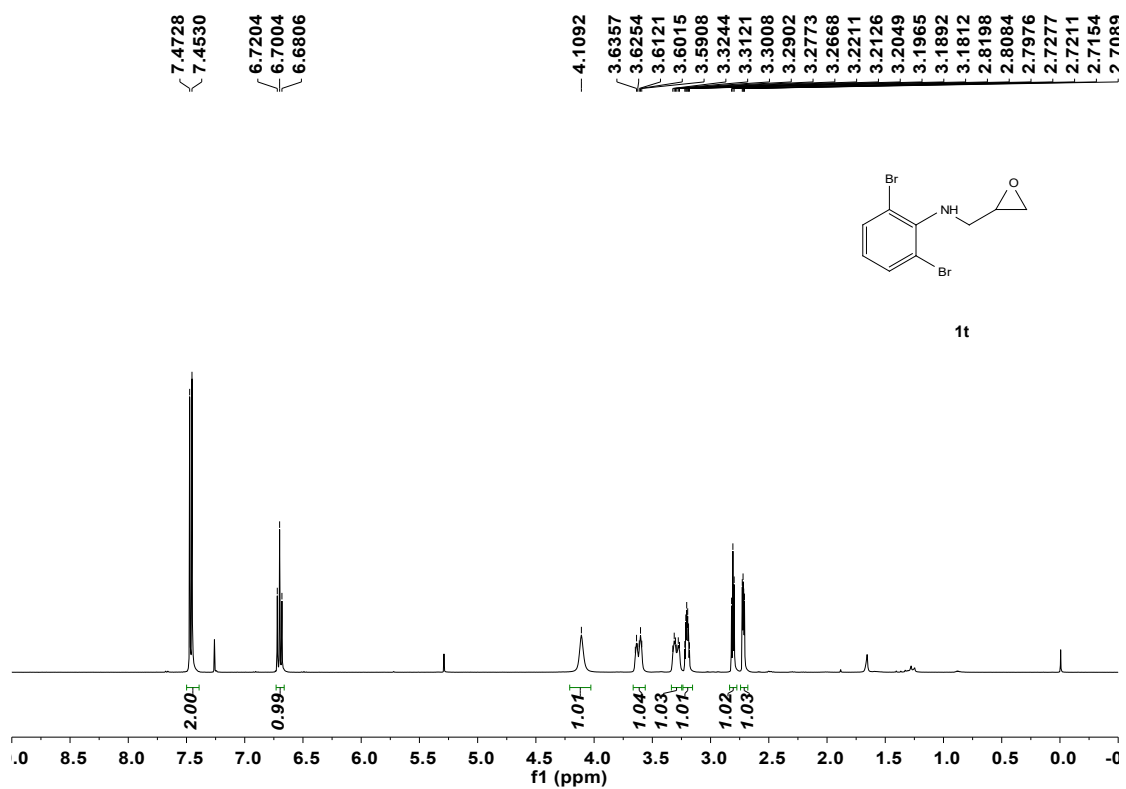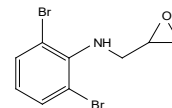

1t

<sup>1</sup>H NMR spectrum (CDCl<sub>3</sub>, 400 MHz) of 1t

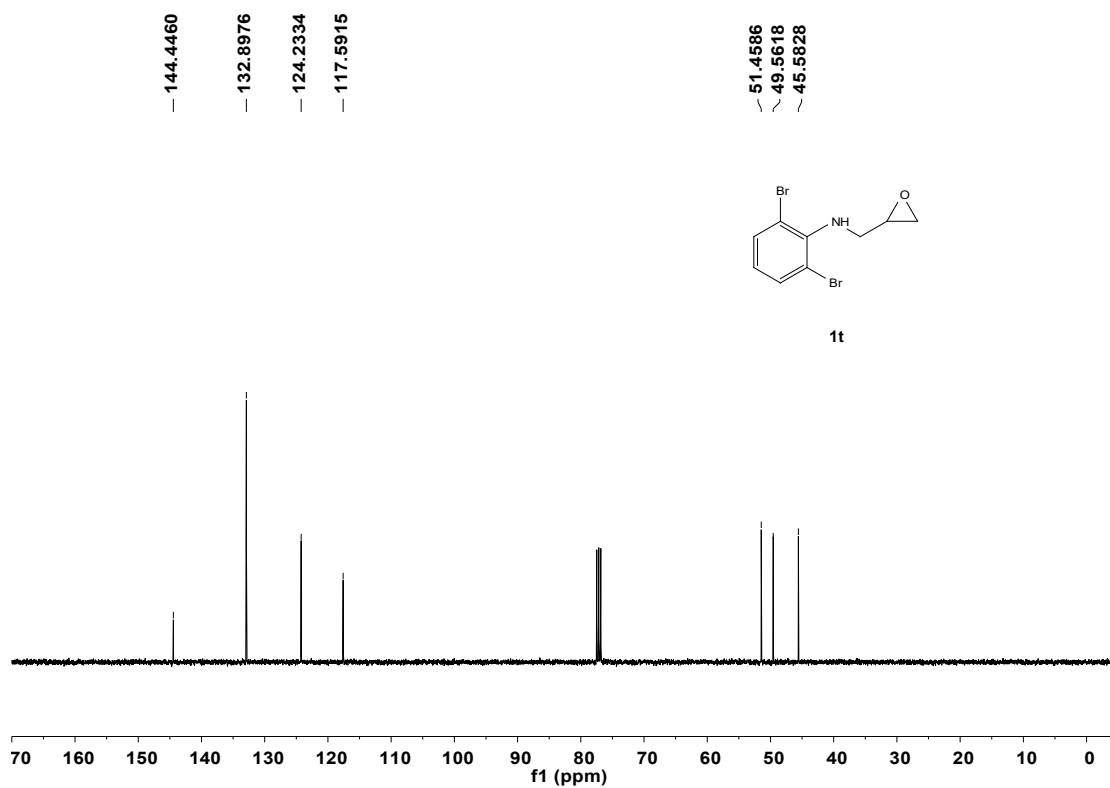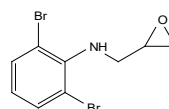

1t

<sup>13</sup>C NMR spectrum (CDCl<sub>3</sub>, 101 MHz) of 1t

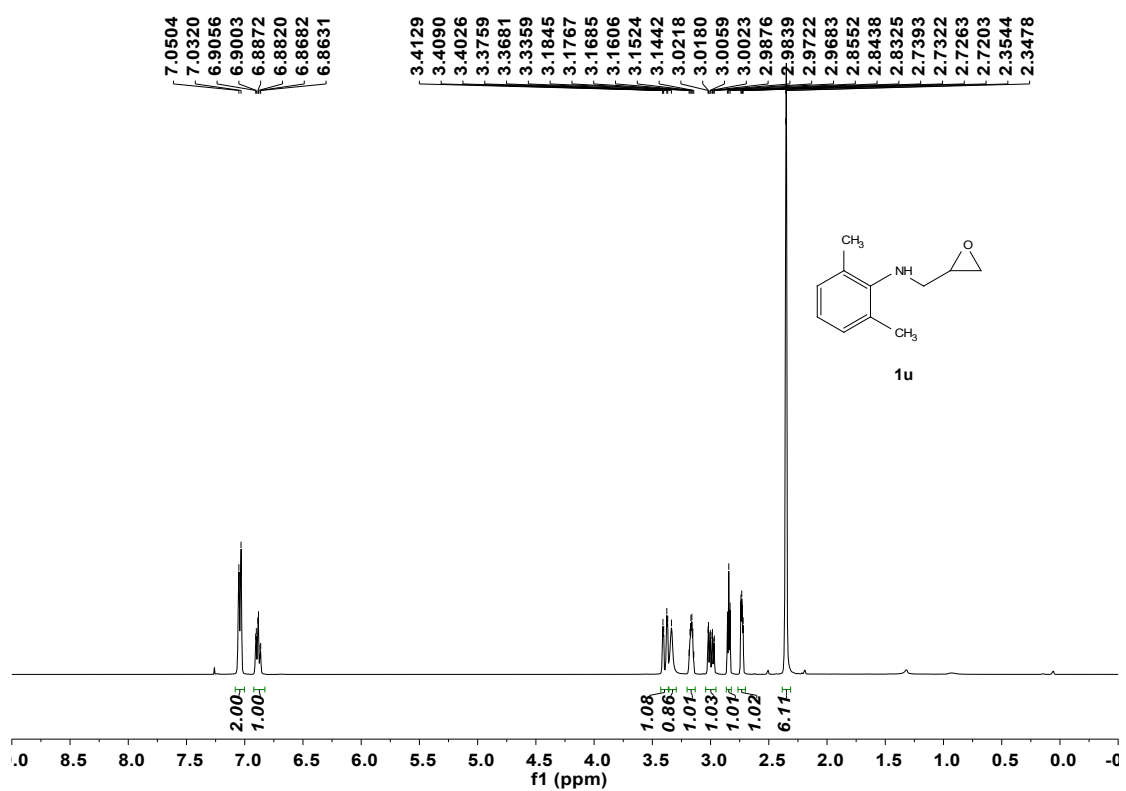

<sup>1</sup>H NMR spectrum (CDCl<sub>3</sub>, 400 MHz) of **1u**

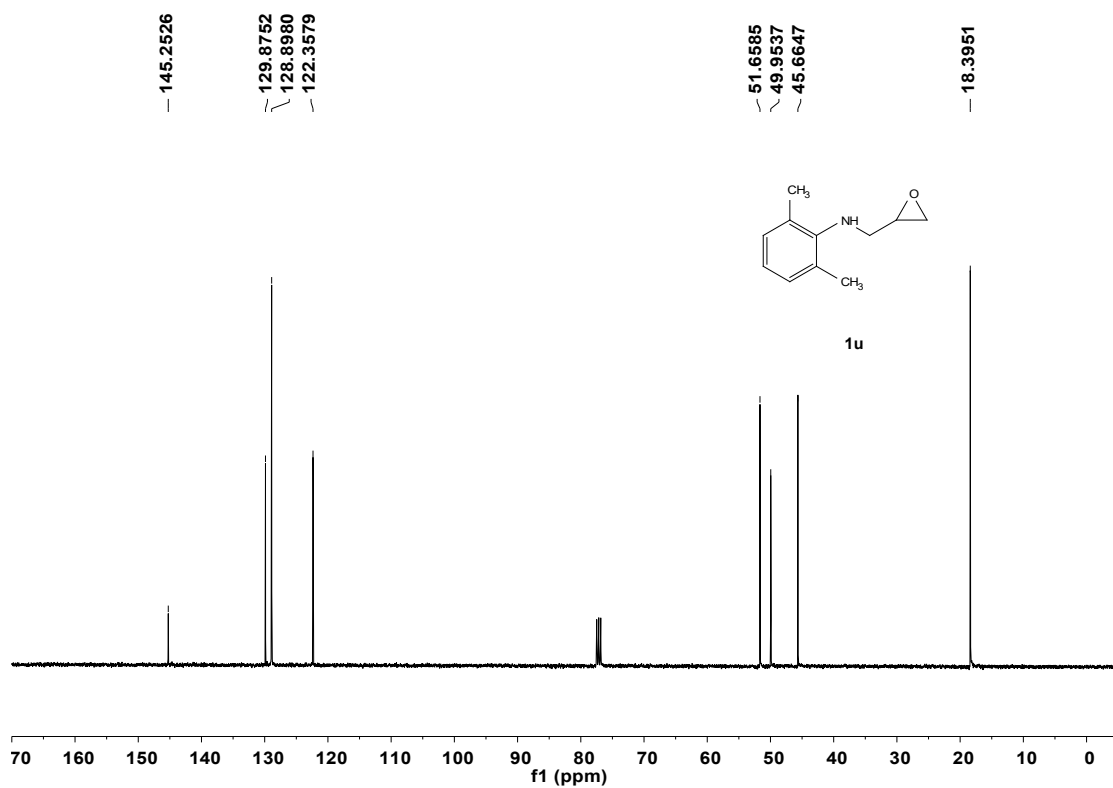

<sup>13</sup>C NMR spectrum (CDCl<sub>3</sub>, 101 MHz) of **1u**

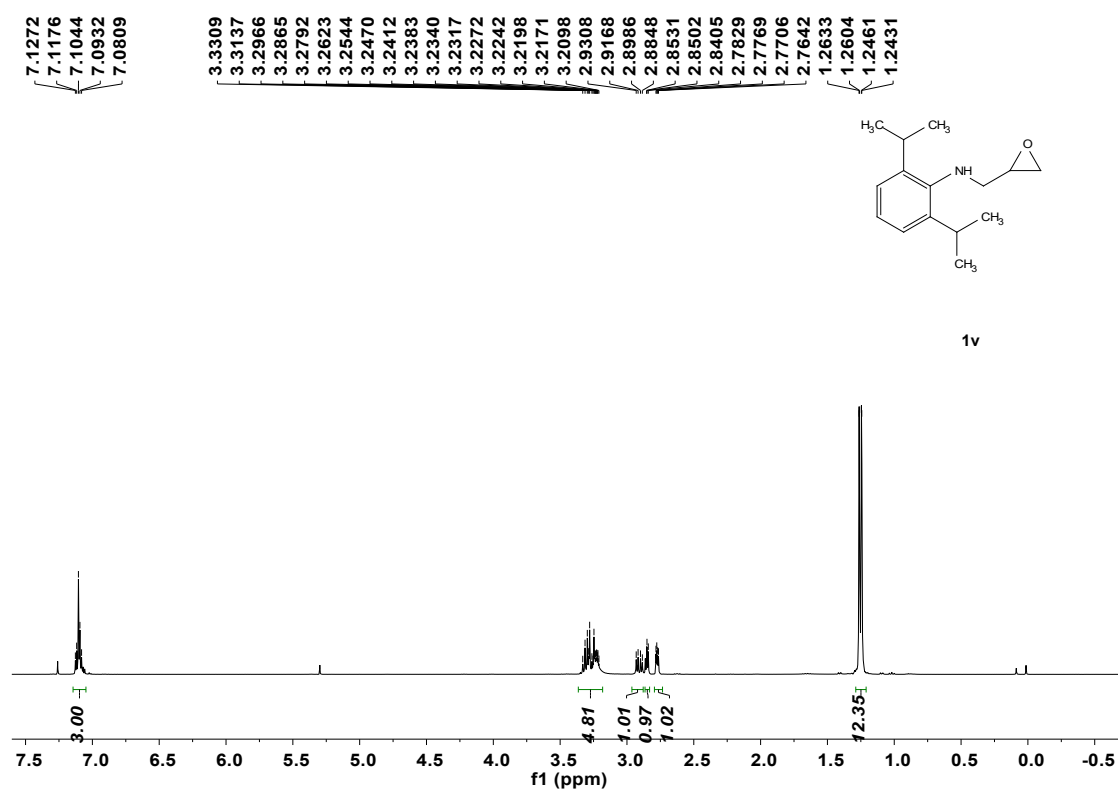

<sup>1</sup>H NMR spectrum (CDCl<sub>3</sub>, 400 MHz) of **1v**

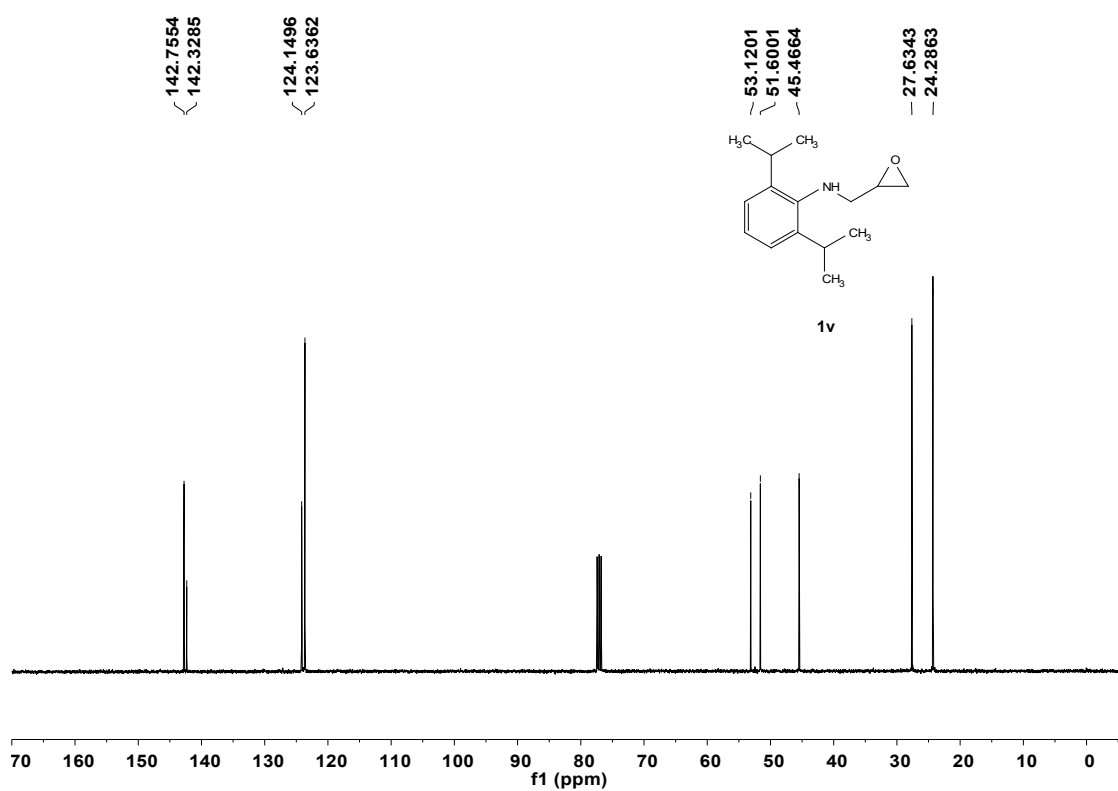

<sup>13</sup>C NMR spectrum (CDCl<sub>3</sub>, 101 MHz) of **1v**

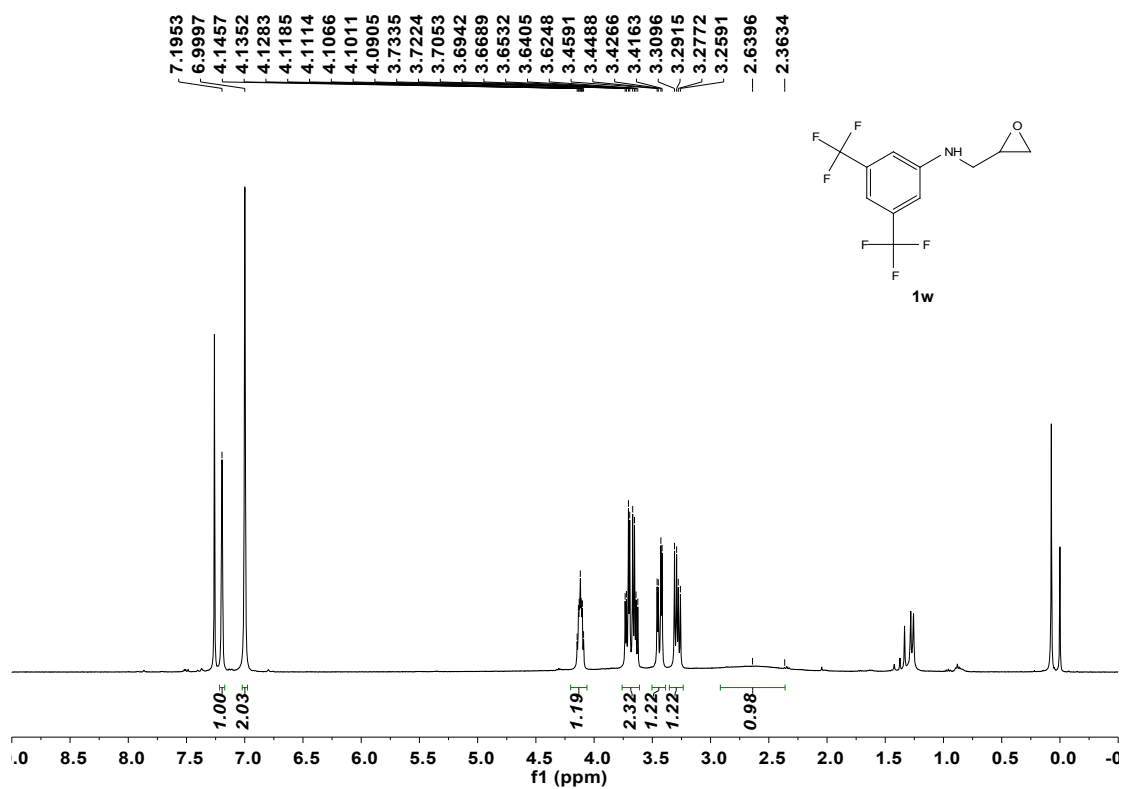

$^1\text{H}$  NMR spectrum ( $\text{CDCl}_3$ , 400 MHz) of **1w**

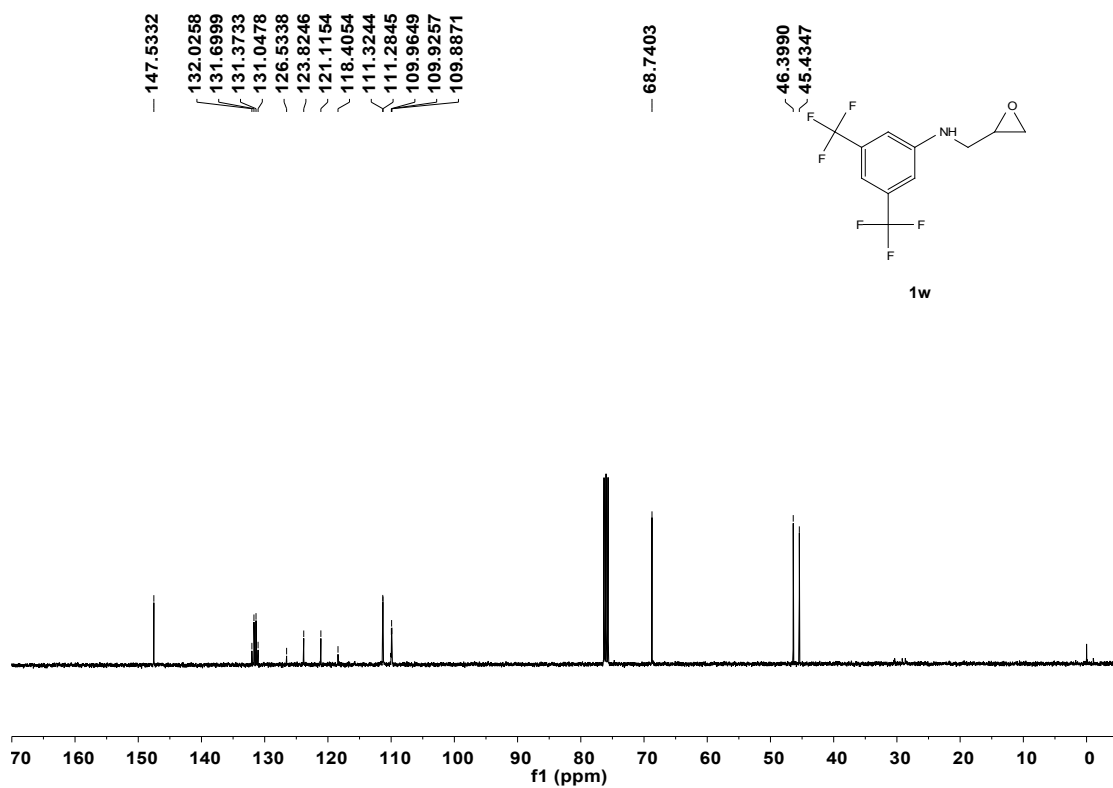

$^{13}\text{C}$  NMR spectrum ( $\text{CDCl}_3$ , 101 MHz) of **1w**

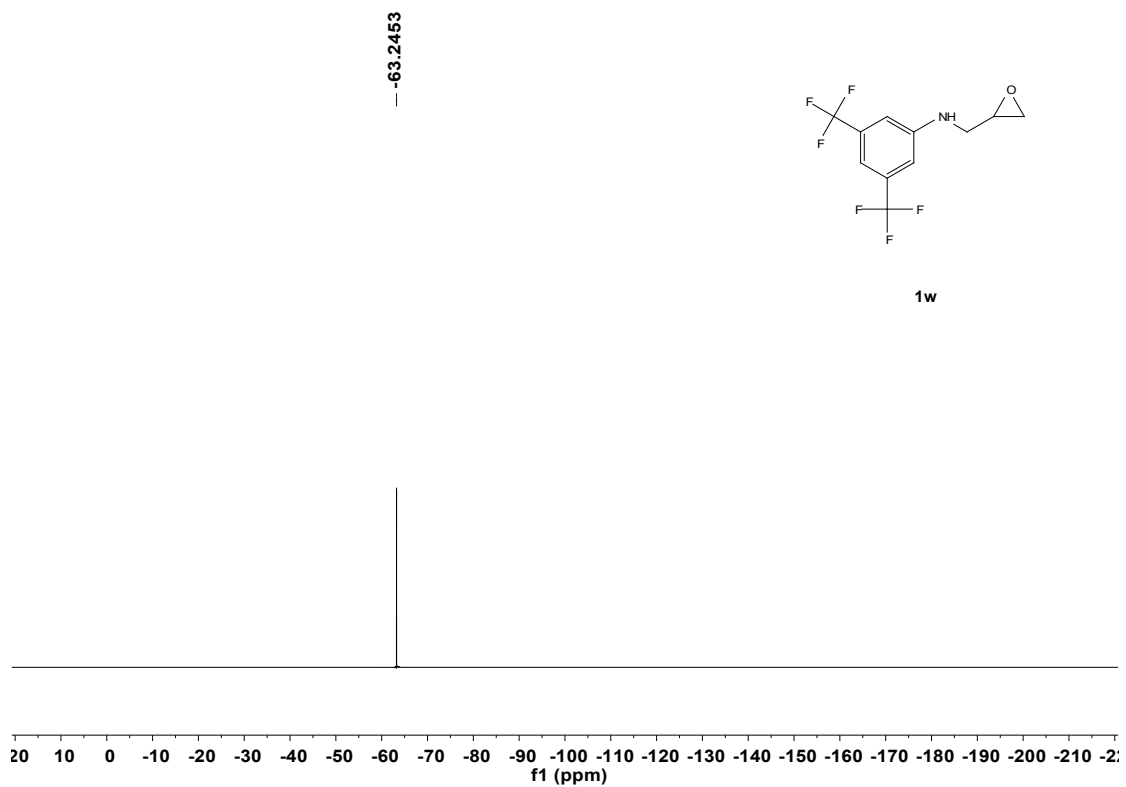

<sup>19</sup>F NMR spectrum (CDCl<sub>3</sub>, 376 MHz) of **1w**

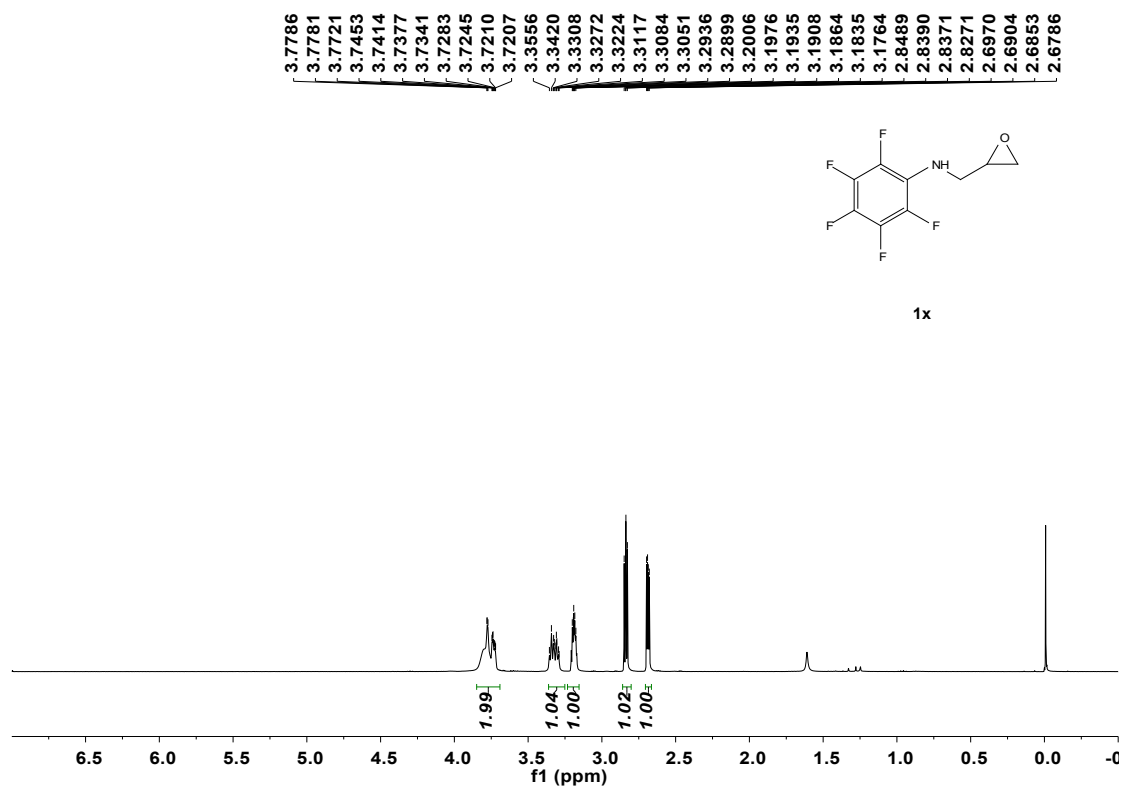

<sup>1</sup>H NMR spectrum (CDCl<sub>3</sub>, 400 MHz) of **1x**

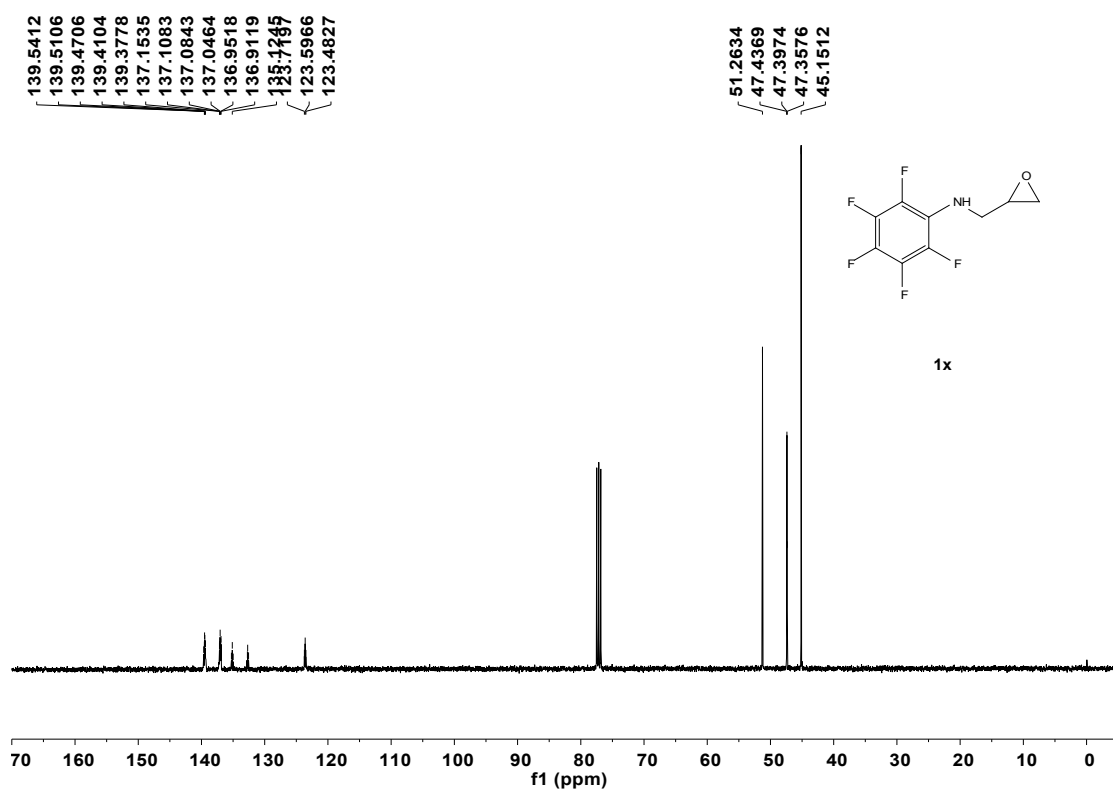

<sup>13</sup>C NMR spectrum (CDCl<sub>3</sub>, 101 MHz) of **1x**

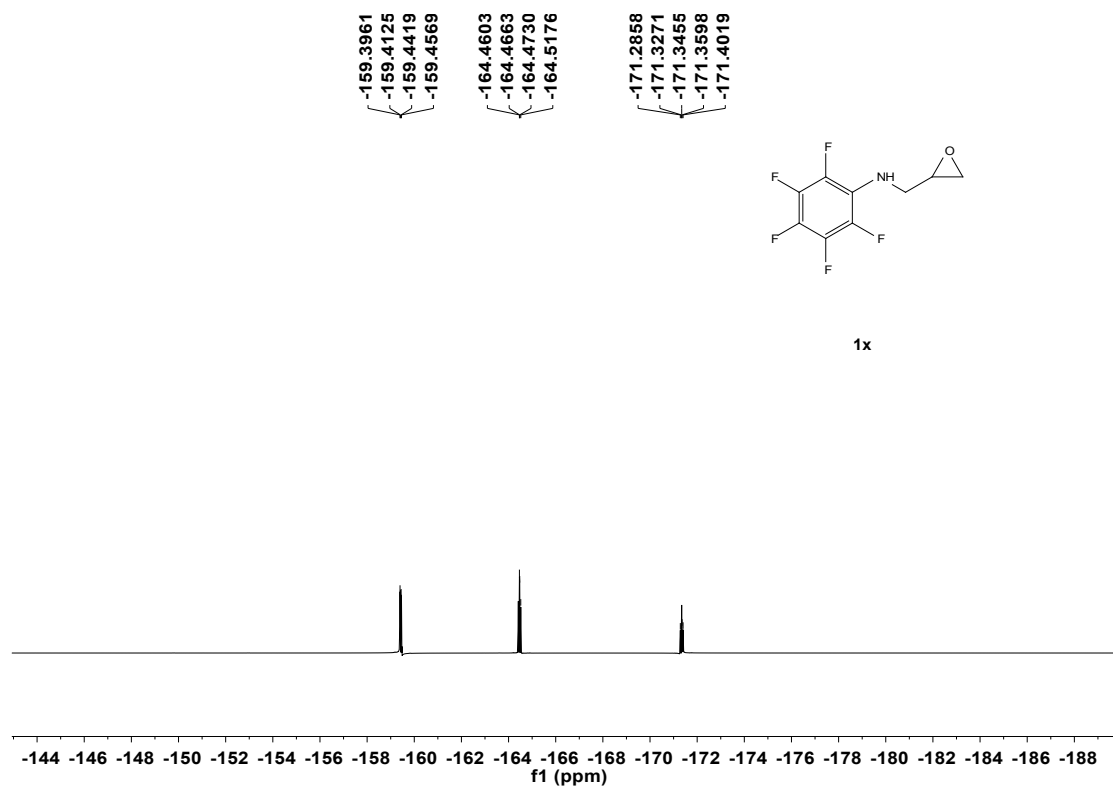

<sup>19</sup>F NMR spectrum (CDCl<sub>3</sub>, 376 MHz) of **1x**



## NMR spectra of isolated products

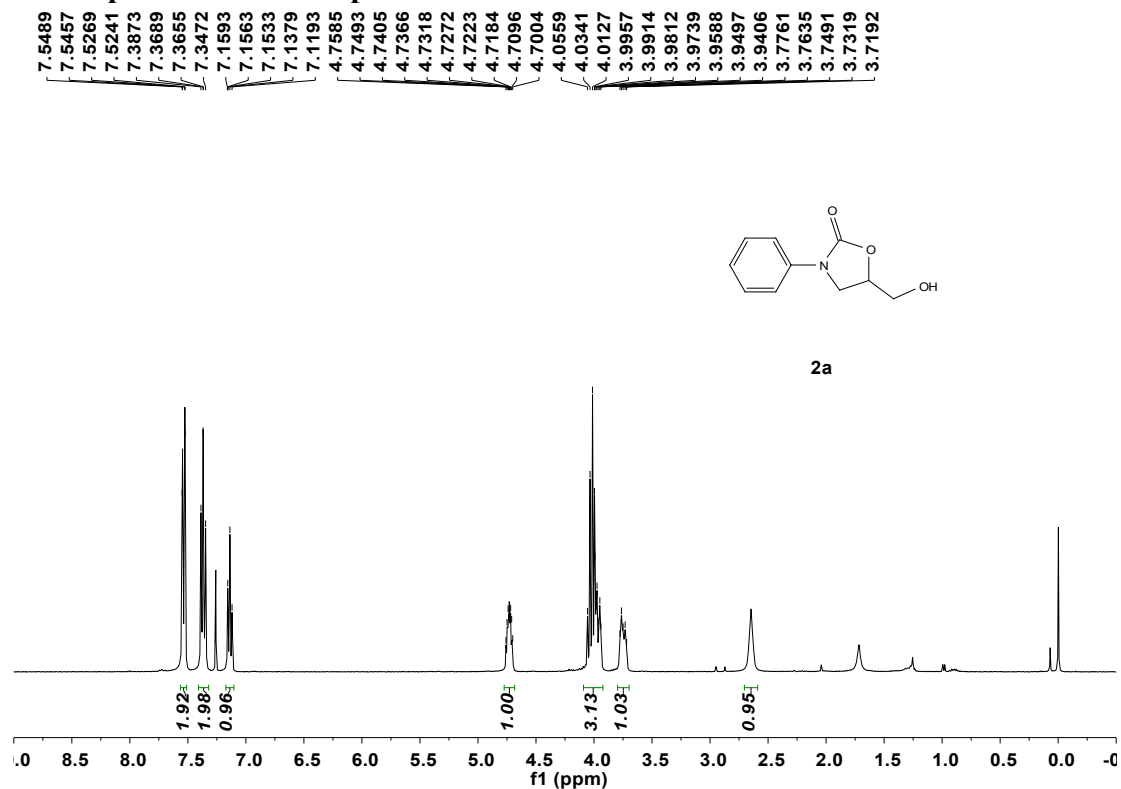

<sup>1</sup>H NMR spectrum (CDCl<sub>3</sub>, 400 MHz) of **2a**

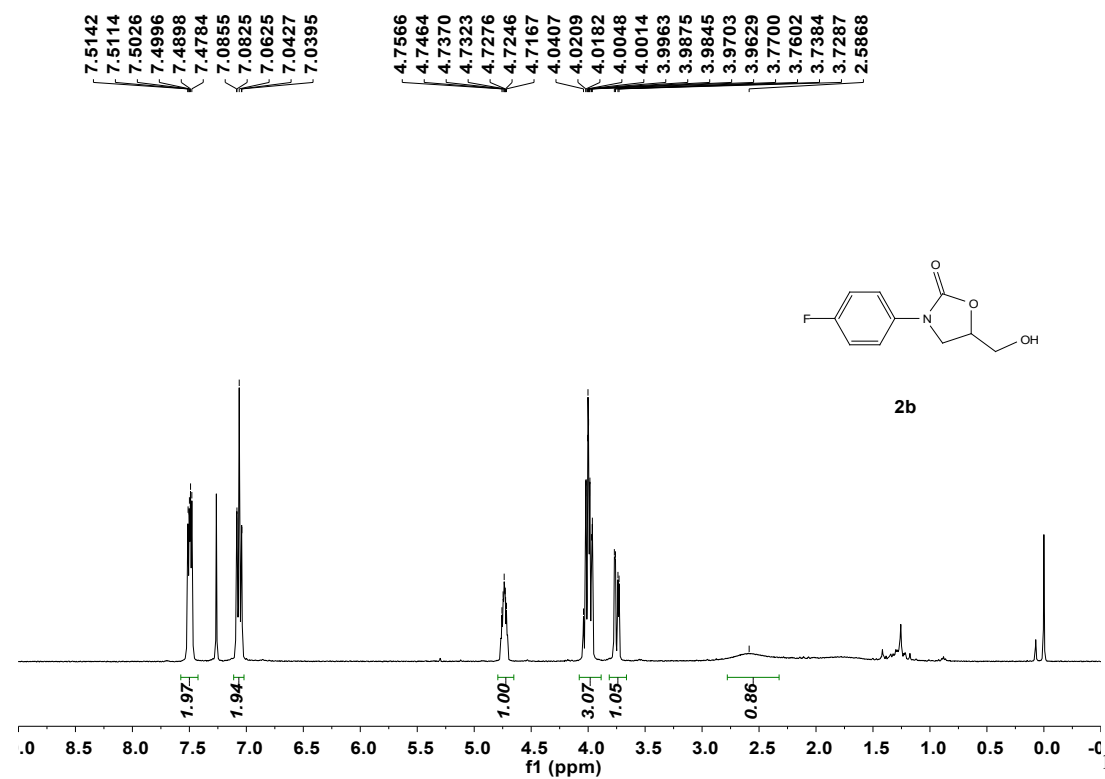

<sup>1</sup>H NMR spectrum (CDCl<sub>3</sub>, 400 MHz) of **2b**

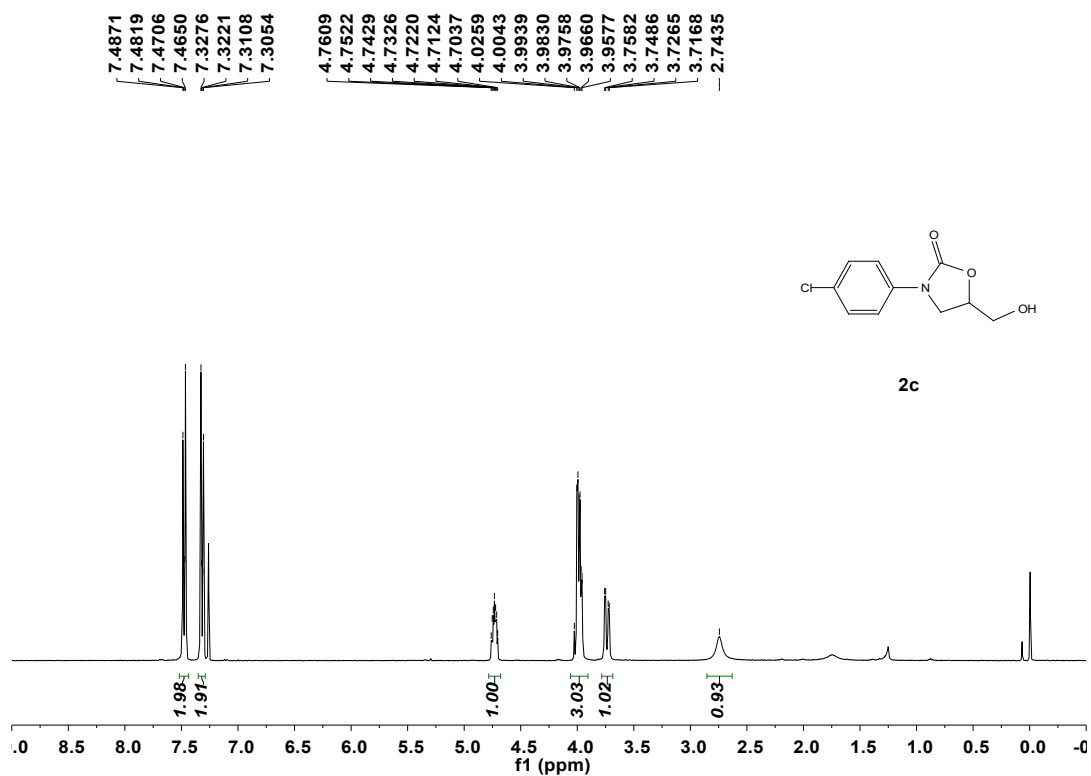

<sup>1</sup>H NMR spectrum (CDCl<sub>3</sub>, 400 MHz) of **2c**

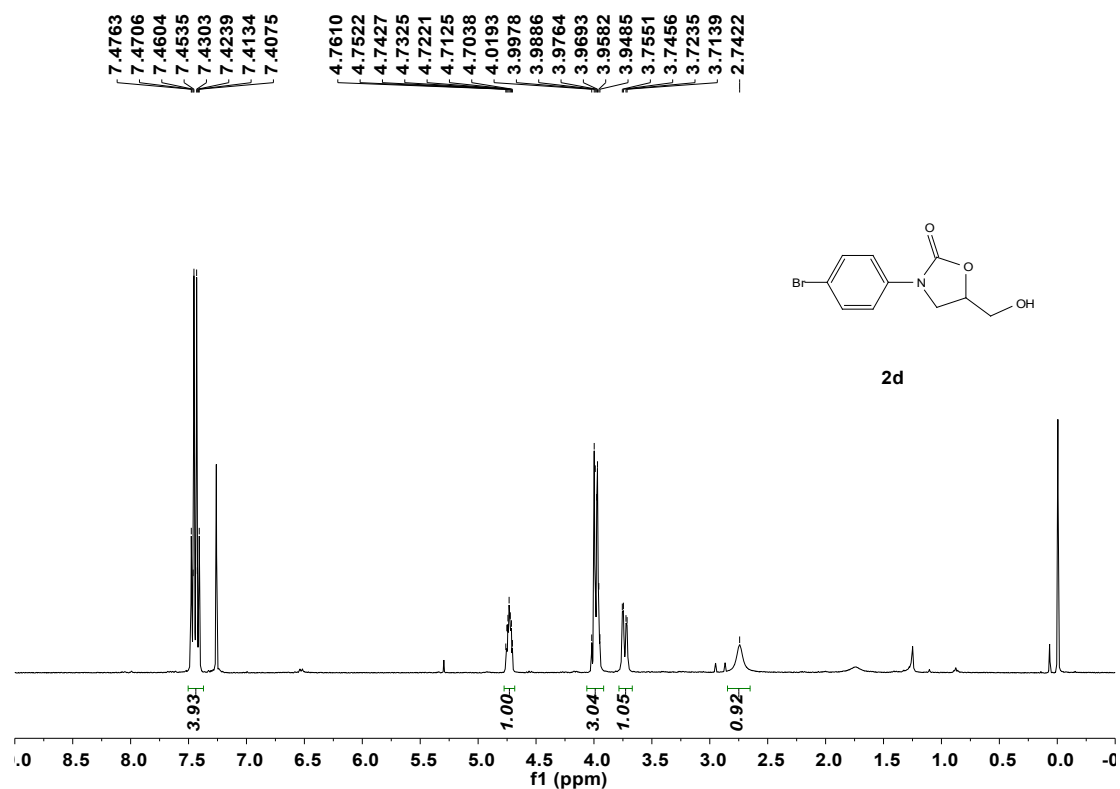

<sup>1</sup>H NMR spectrum (CDCl<sub>3</sub>, 400 MHz) of **2d**

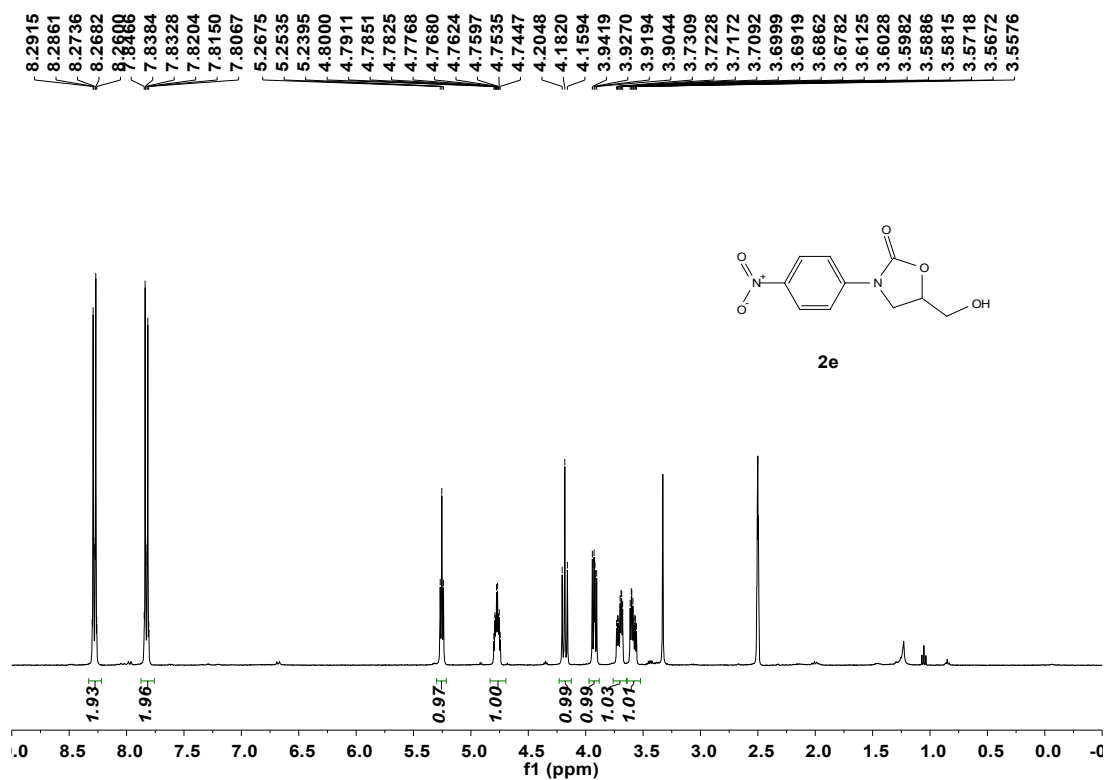

<sup>1</sup>H NMR spectrum (DMSO, 400 MHz) of **2e**

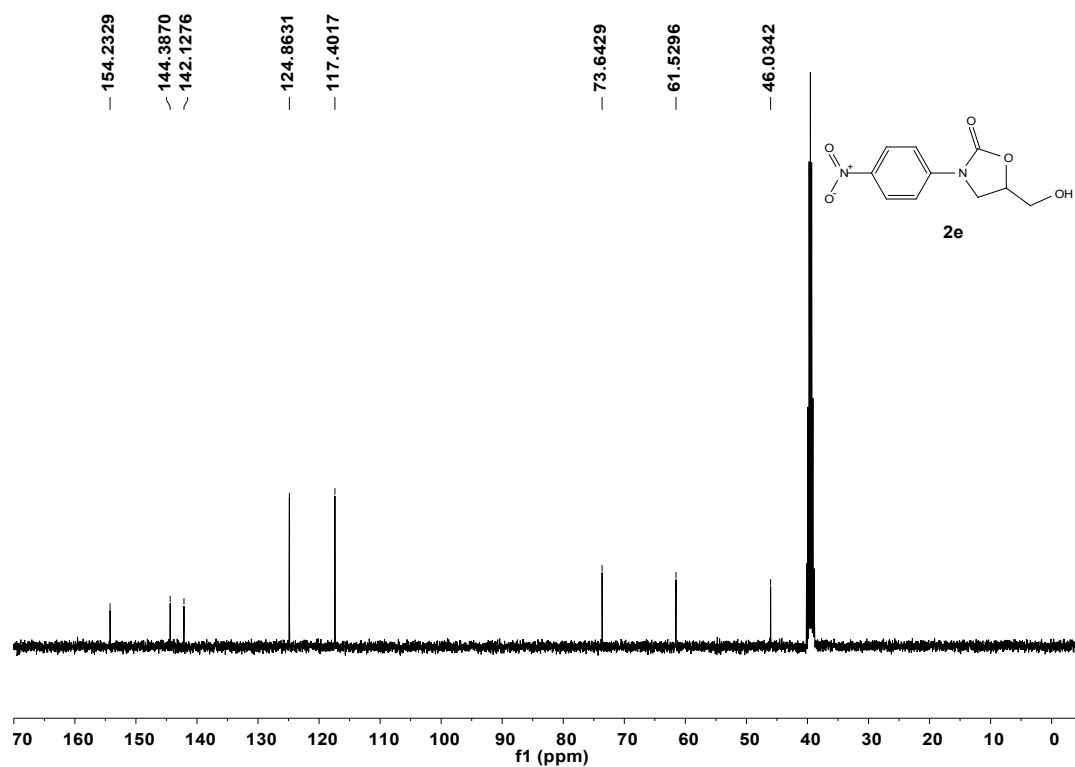

<sup>13</sup>C NMR spectrum (DMSO, 101 MHz) of **2e**

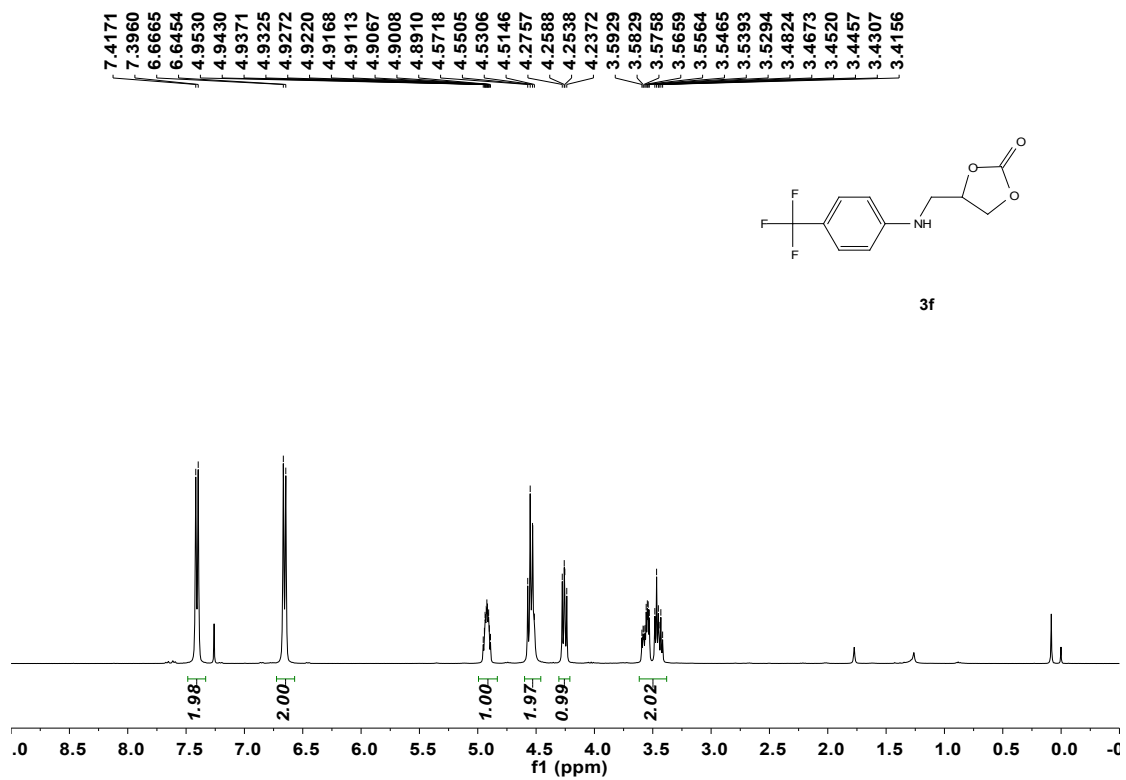

<sup>1</sup>H NMR spectrum (CDCl<sub>3</sub>, 400 MHz) of **3f**

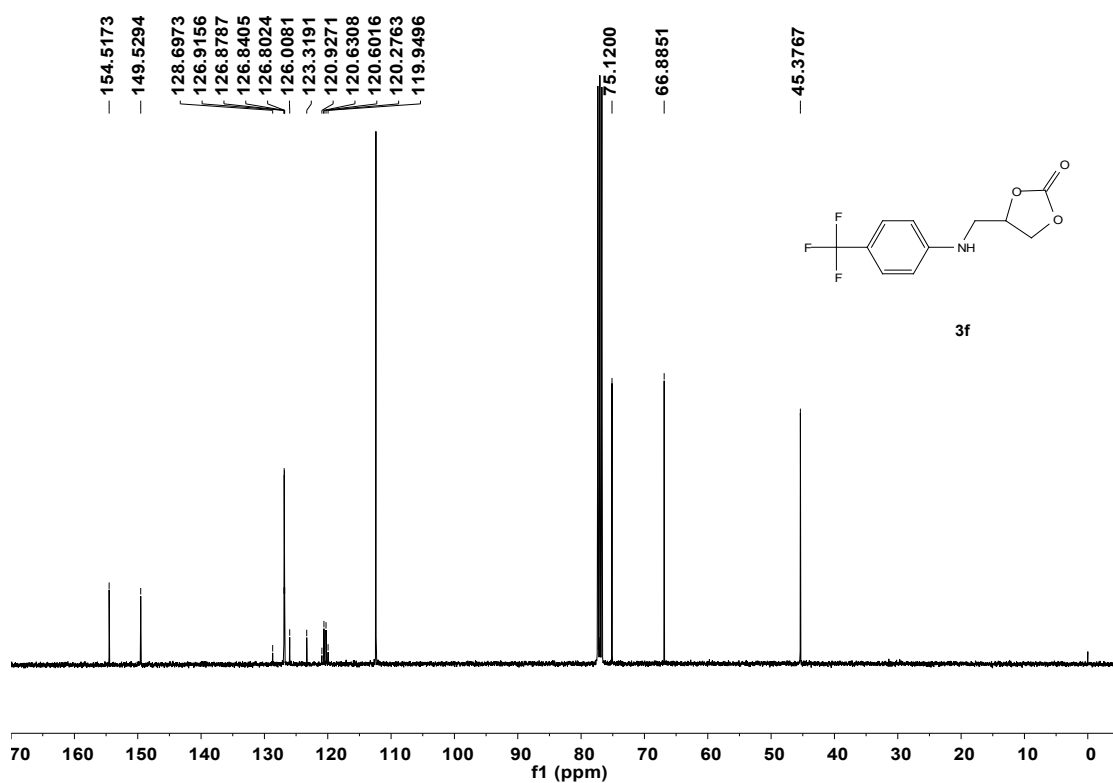

<sup>13</sup>C NMR spectrum (CDCl<sub>3</sub>, 101 MHz) of **3f**

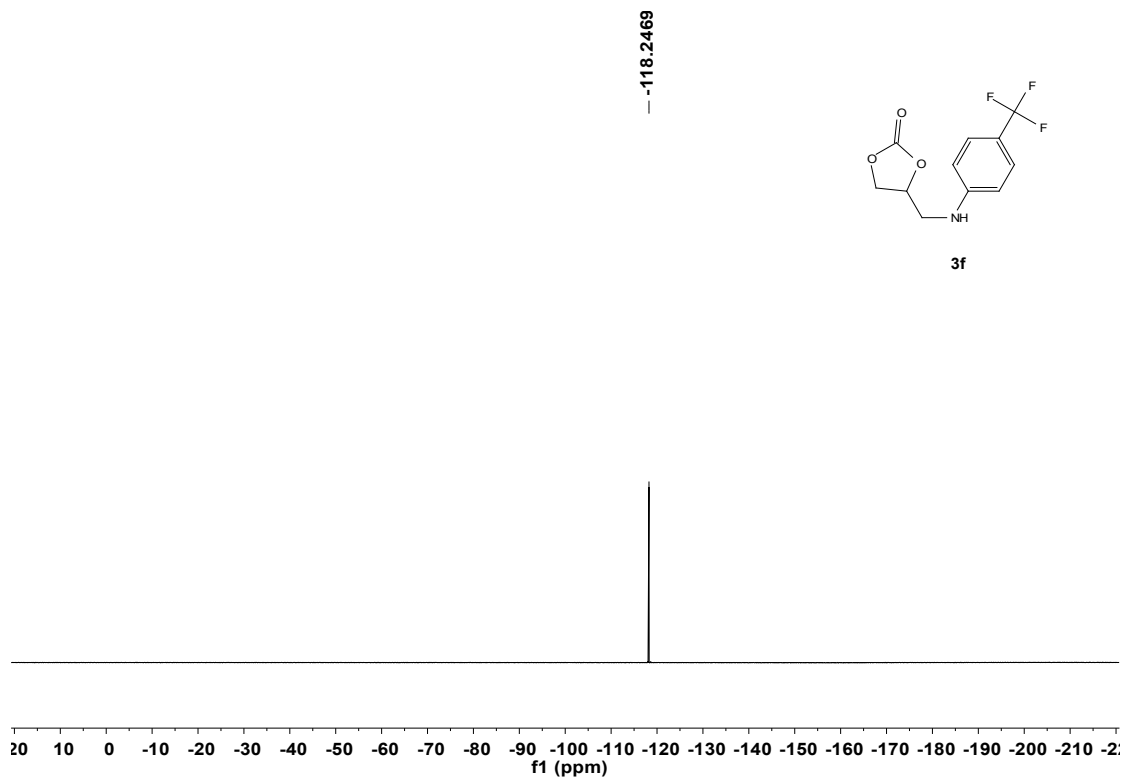

$^{19}\text{F}$  NMR spectrum (CDCl<sub>3</sub>, 376 MHz) of **3f**

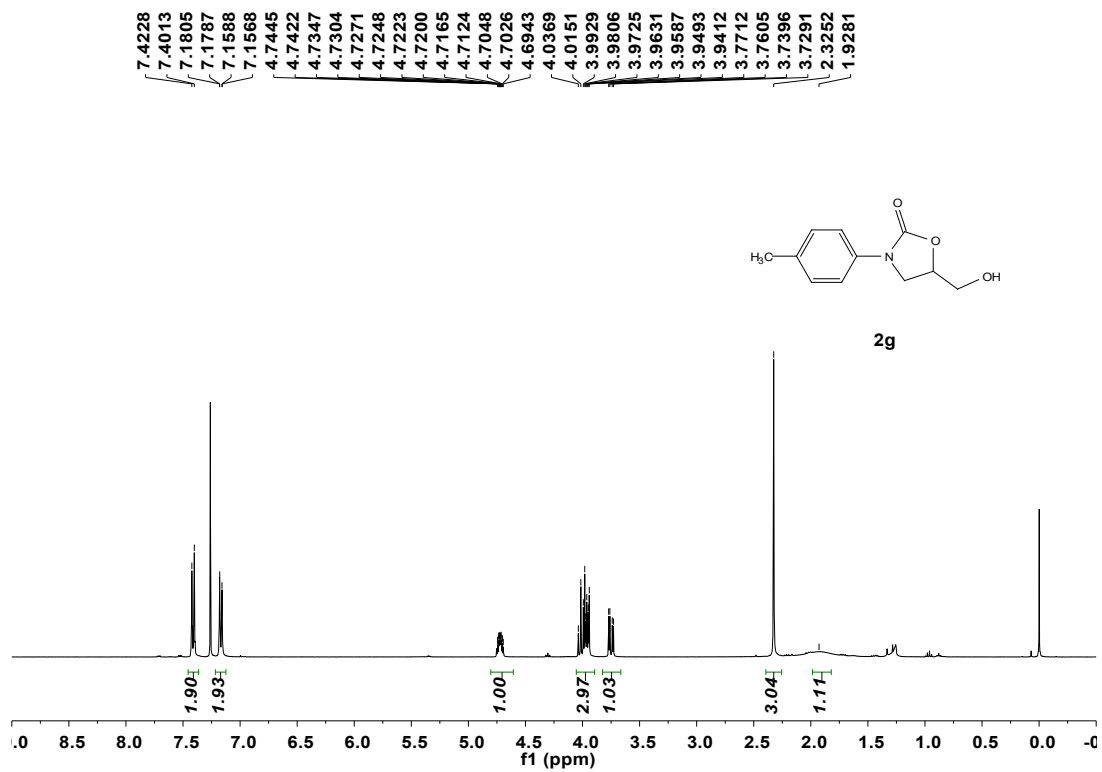

$^1\text{H}$  NMR spectrum (CDCl<sub>3</sub>, 400 MHz) of **2g**

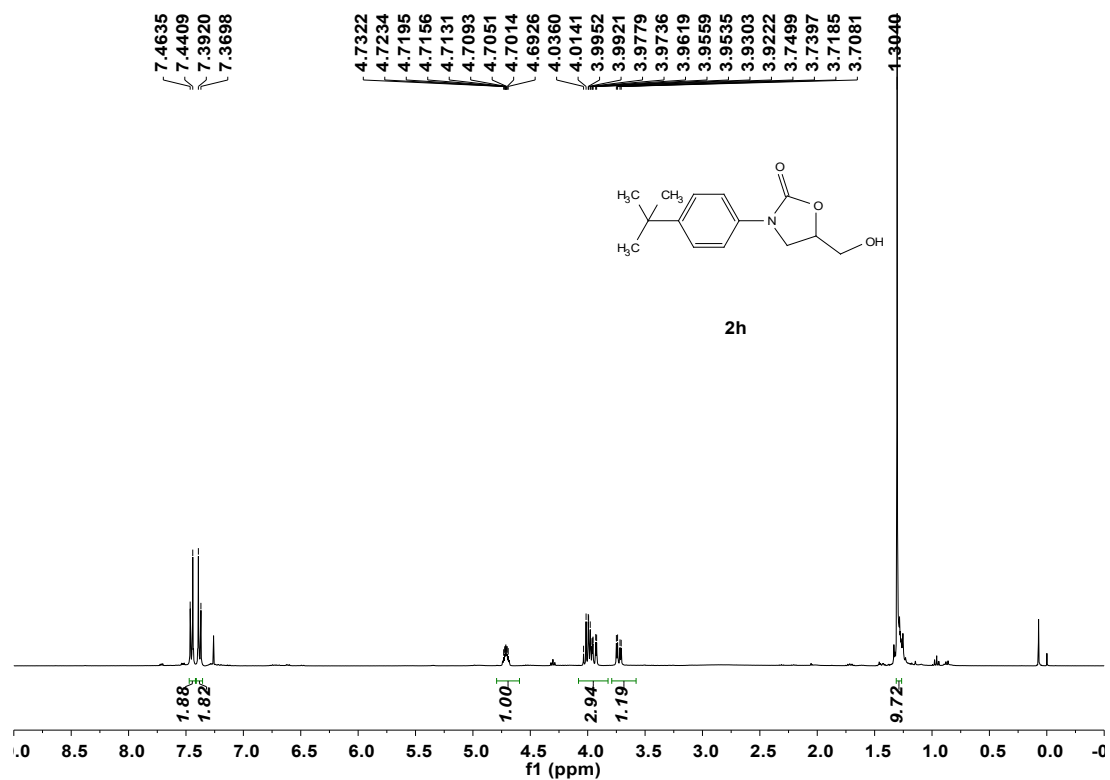

<sup>1</sup>H NMR spectrum (CDCl<sub>3</sub>, 400 MHz) of **2h**

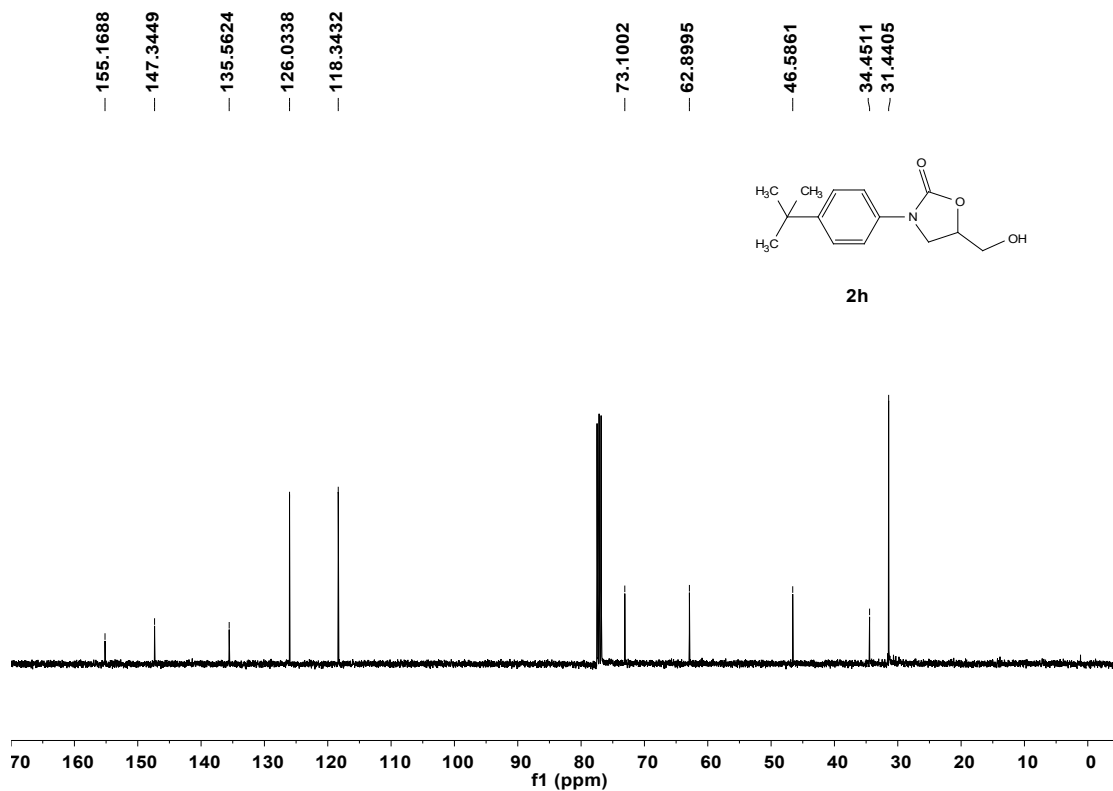

<sup>13</sup>C NMR spectrum (CDCl<sub>3</sub>, 101 MHz) of **2h**

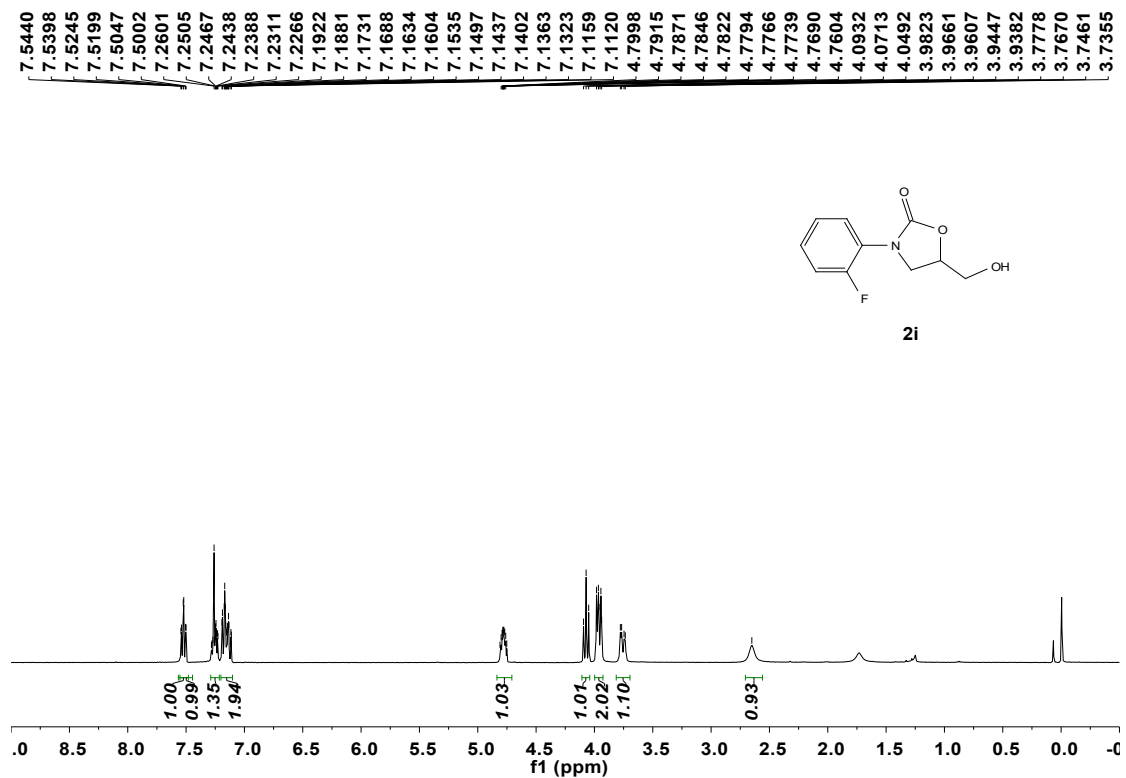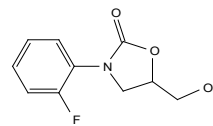

2i

<sup>1</sup>H NMR spectrum (CDCl<sub>3</sub>, 400 MHz) of **2i**

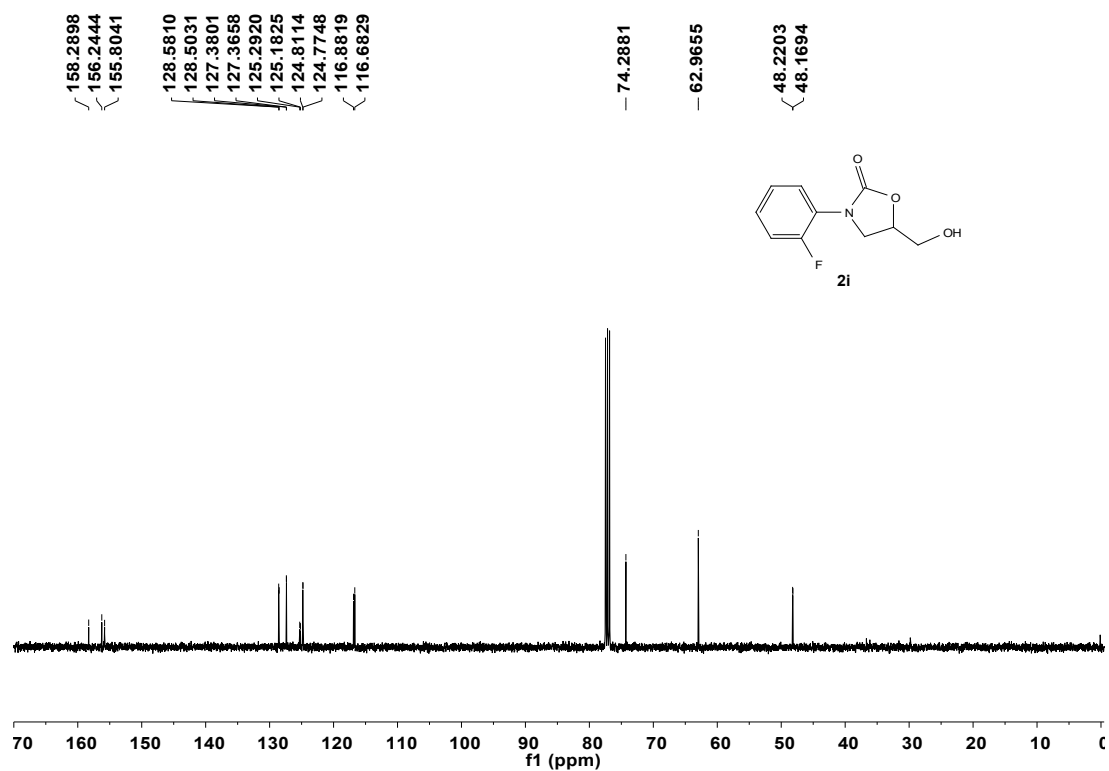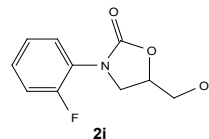

2i

<sup>13</sup>C NMR spectrum (CDCl<sub>3</sub>, 101 MHz) of **2i**

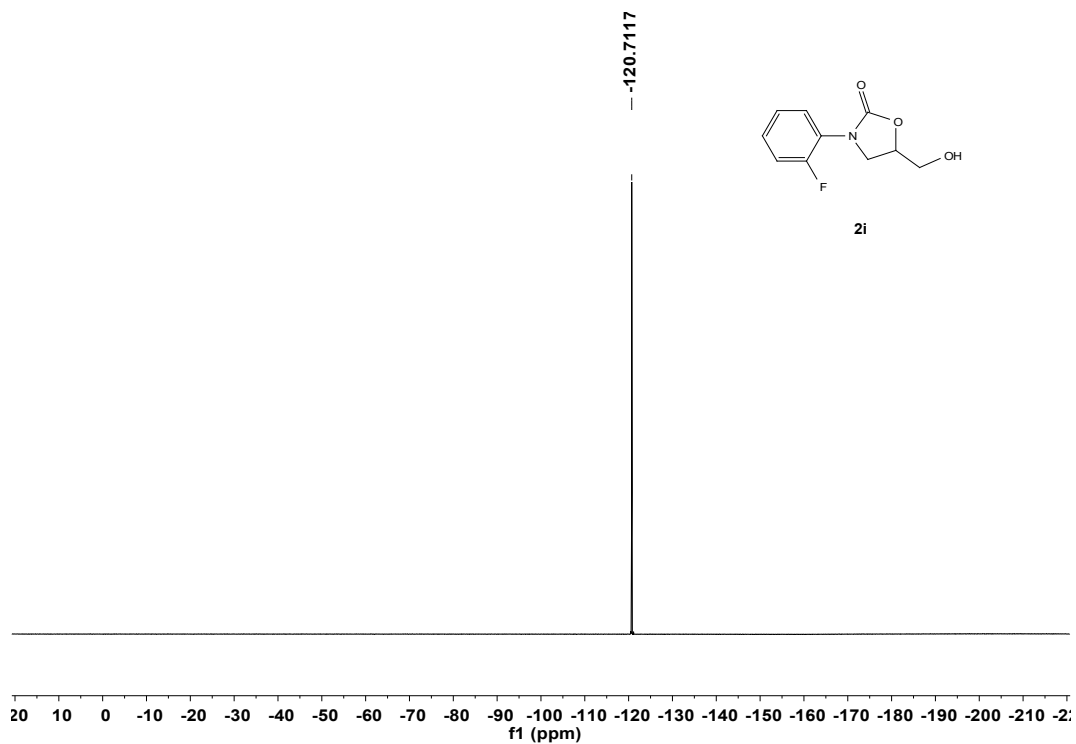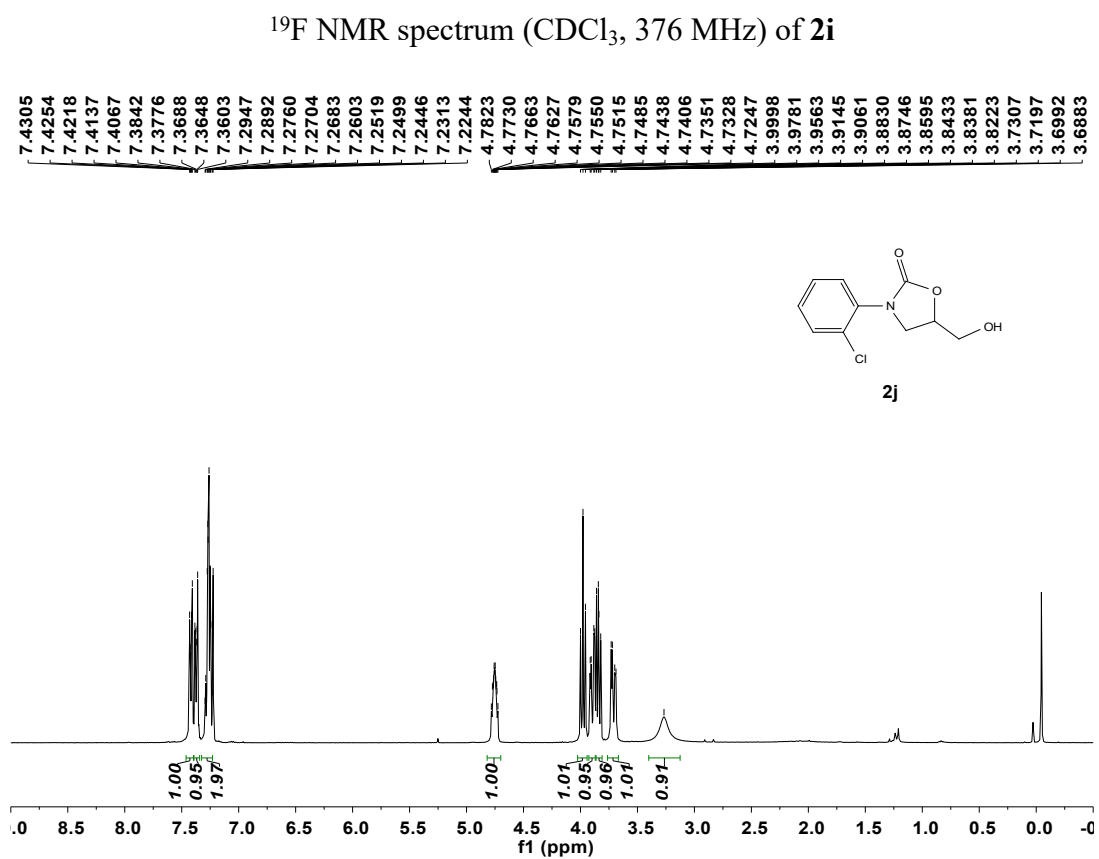



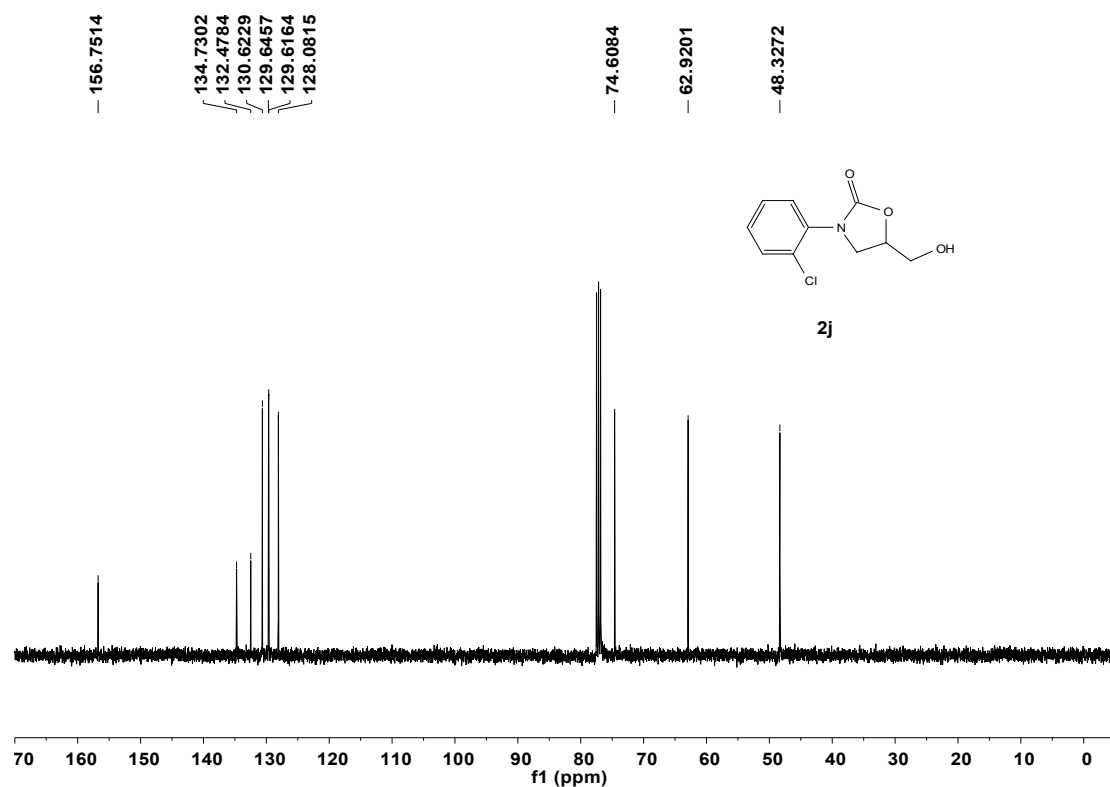

<sup>13</sup>C NMR spectrum (CDCl<sub>3</sub>, 101 MHz) of **2j**

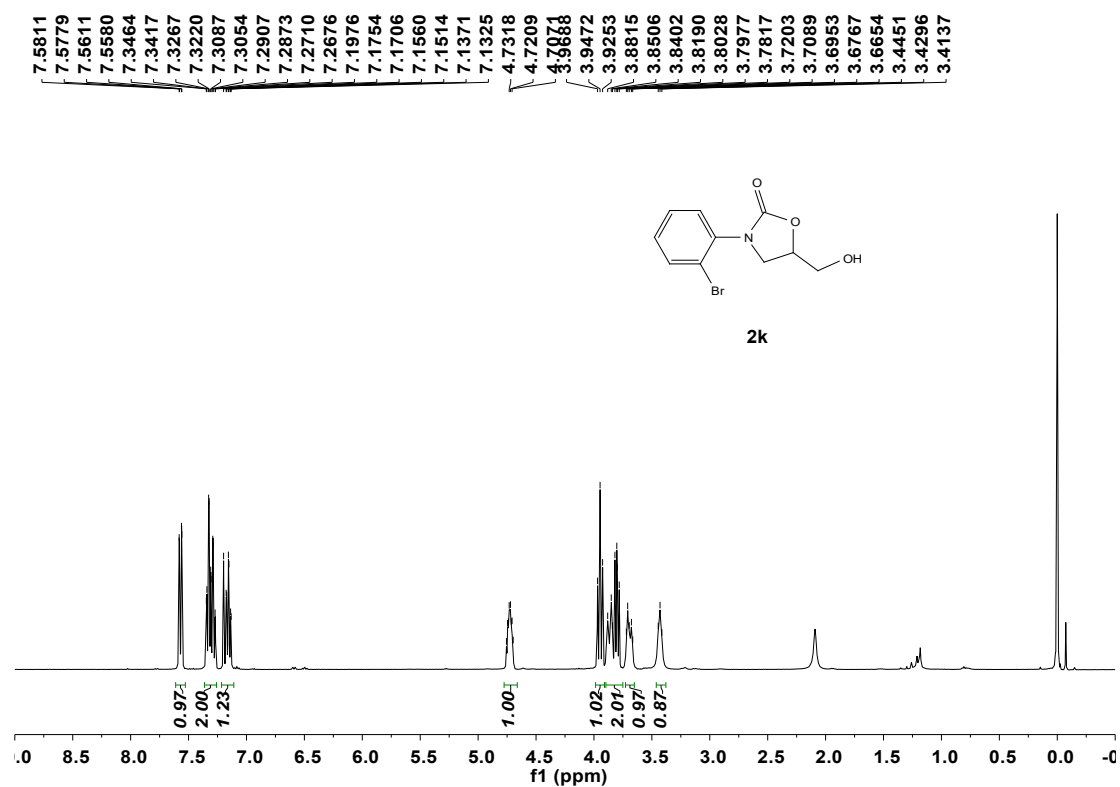

<sup>1</sup>H NMR spectrum (CDCl<sub>3</sub>, 400 MHz) of **2k**

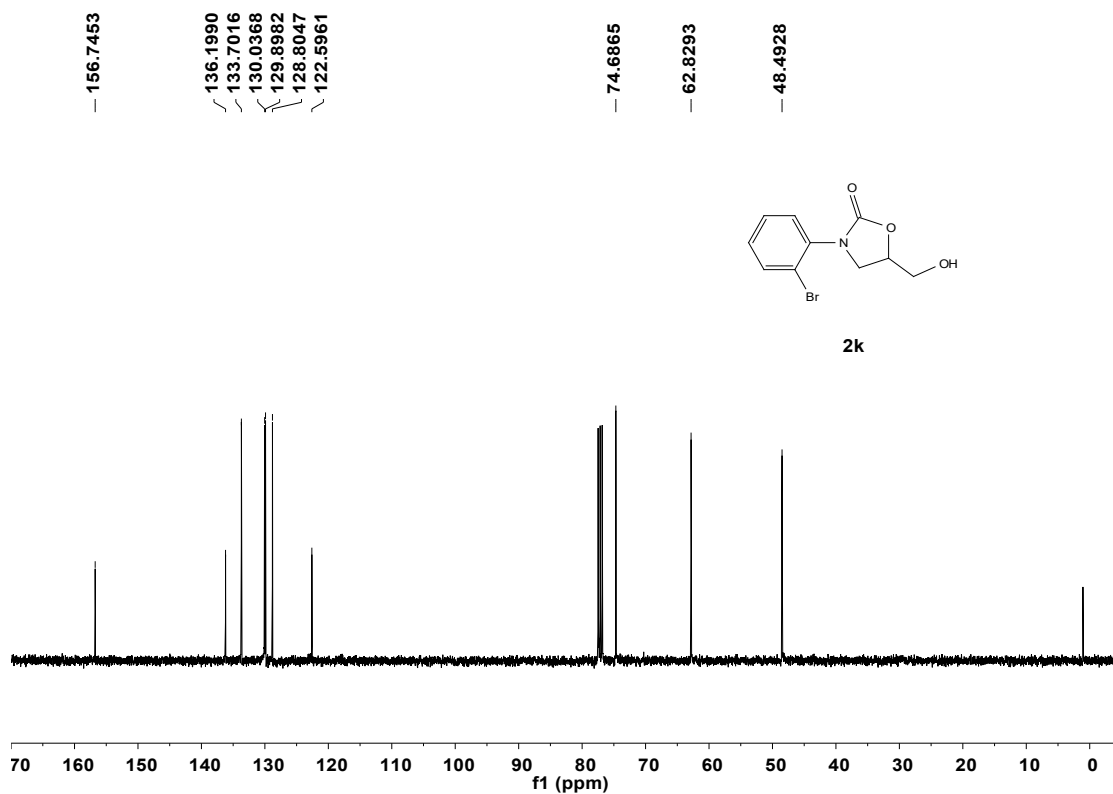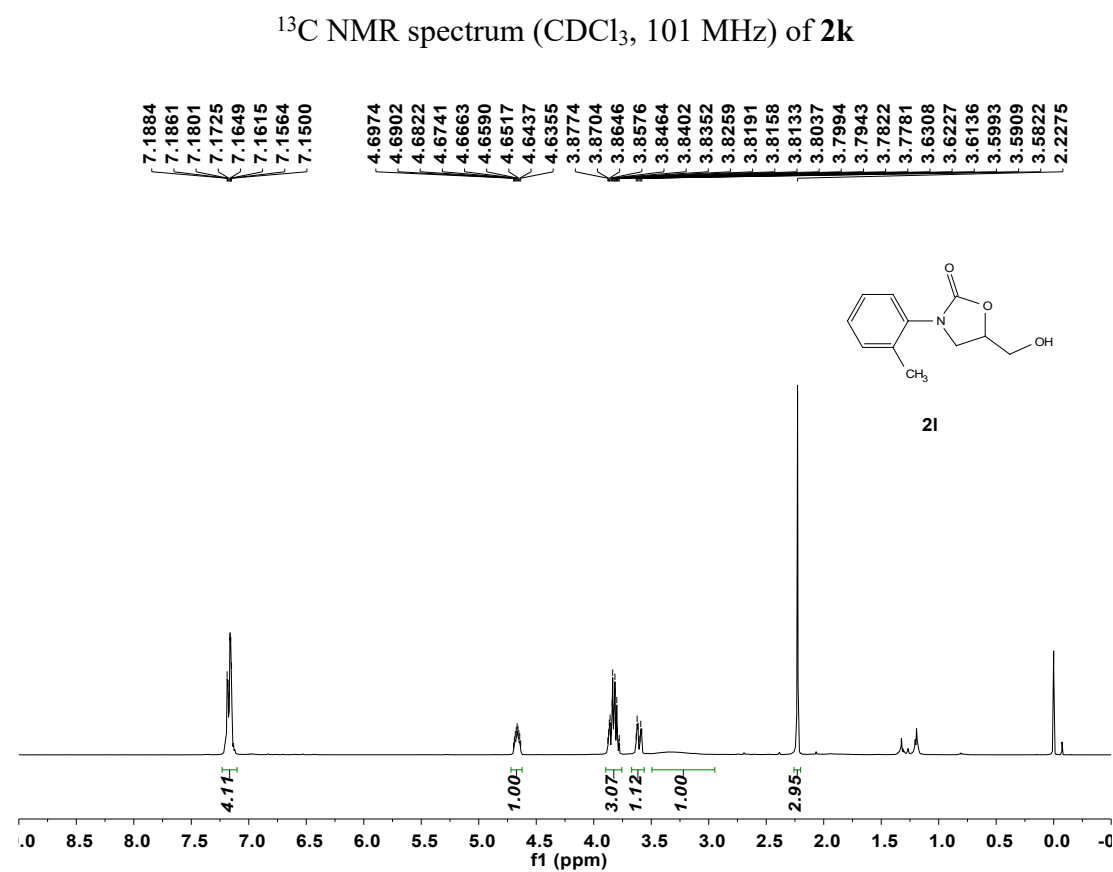

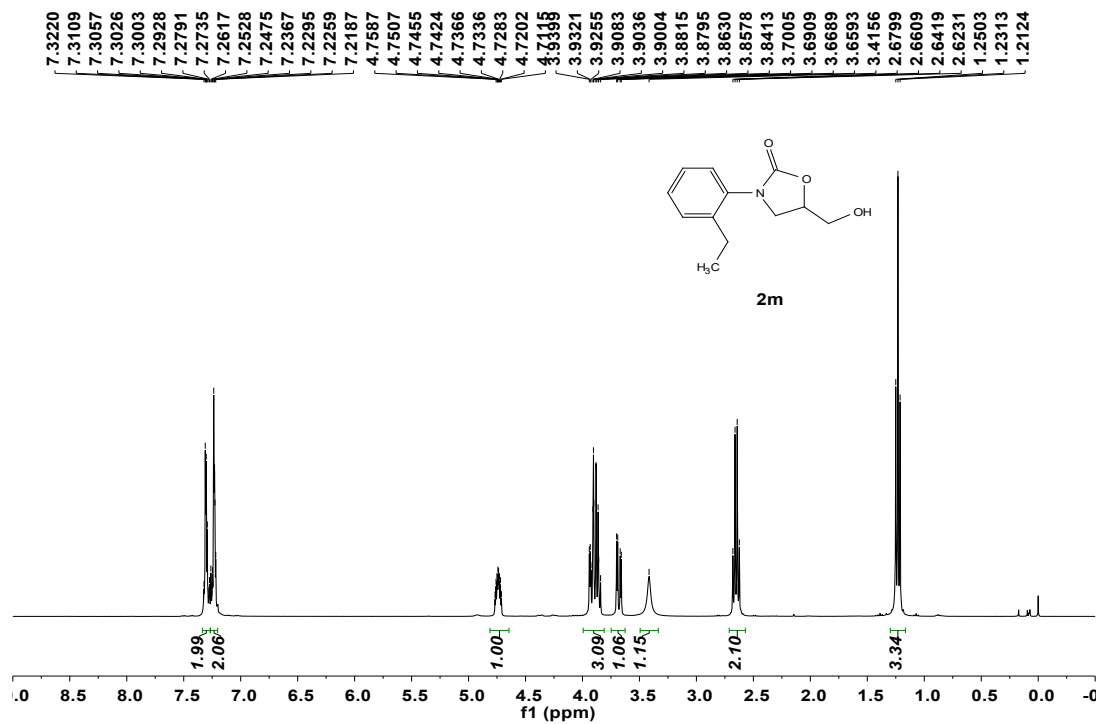

<sup>1</sup>H NMR spectrum (CDCl<sub>3</sub>, 400 MHz) of **2m**

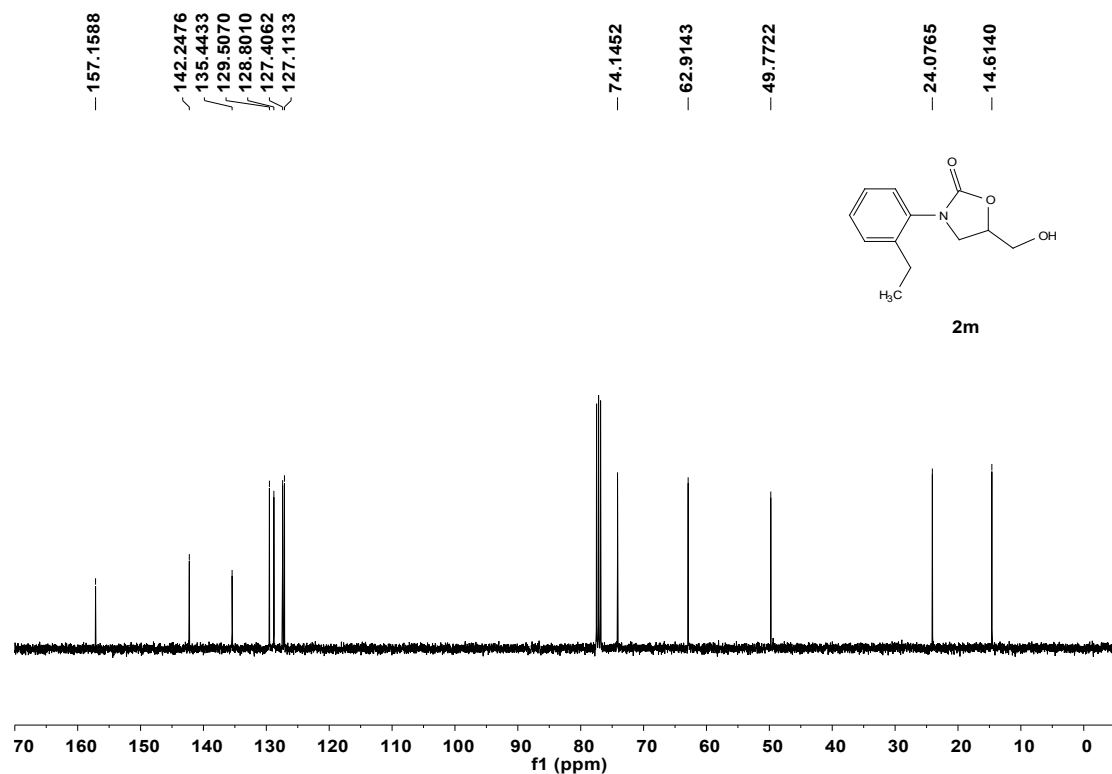

<sup>13</sup>C NMR spectrum (CDCl<sub>3</sub>, 101 MHz) of **2m**

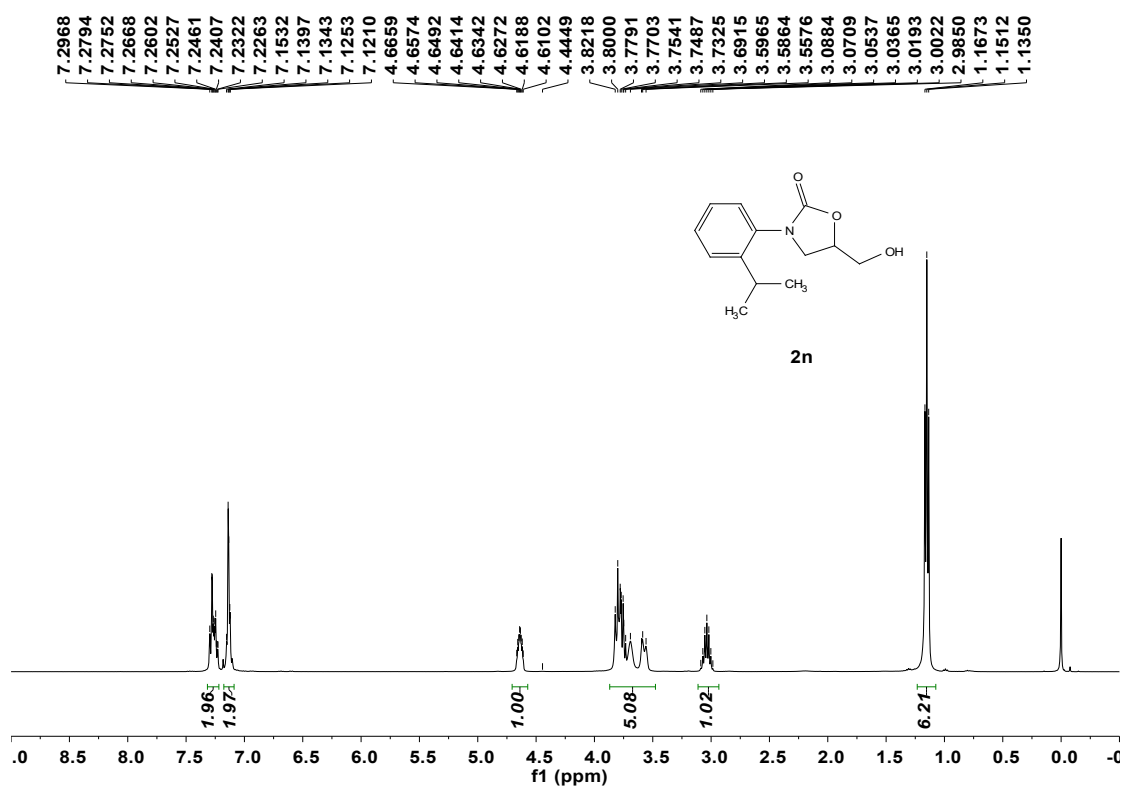

<sup>1</sup>H NMR spectrum (CDCl<sub>3</sub>, 400 MHz) of **2n**

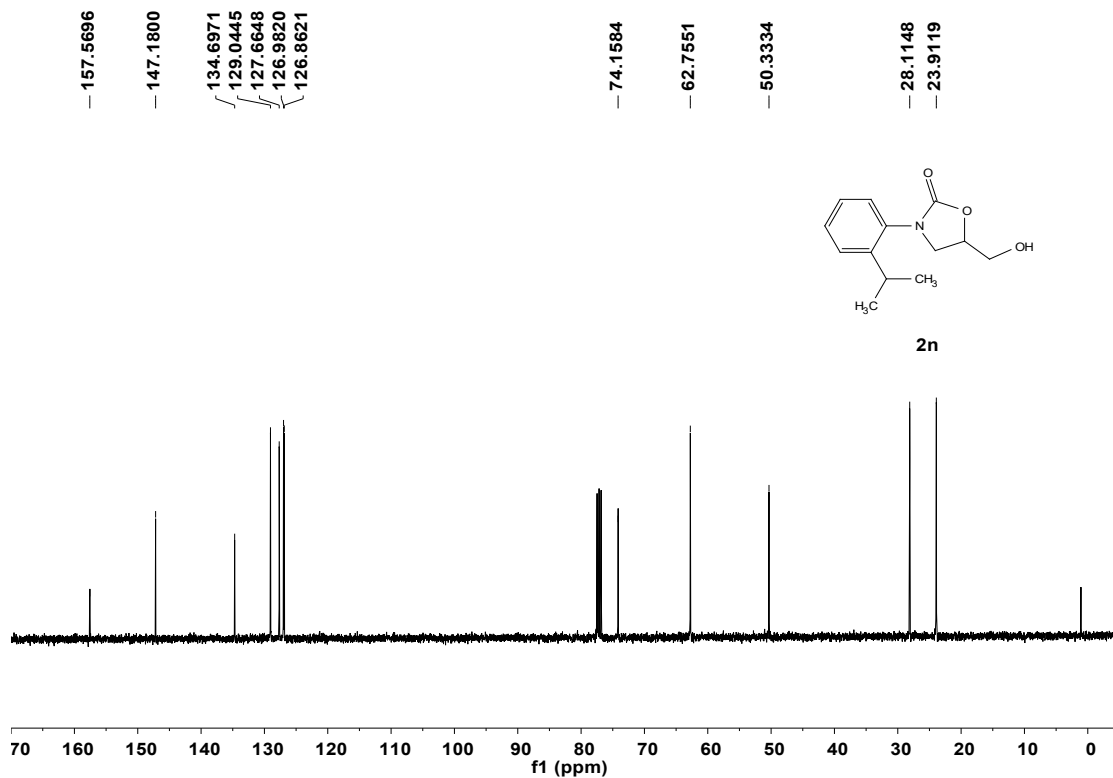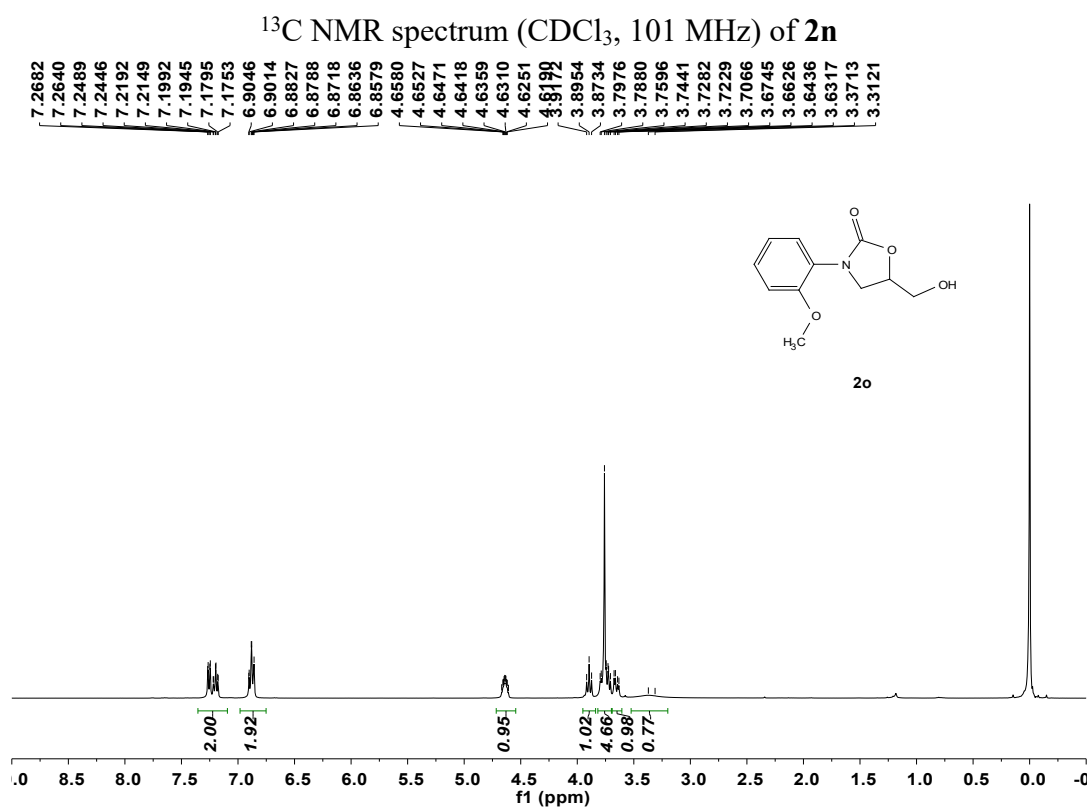

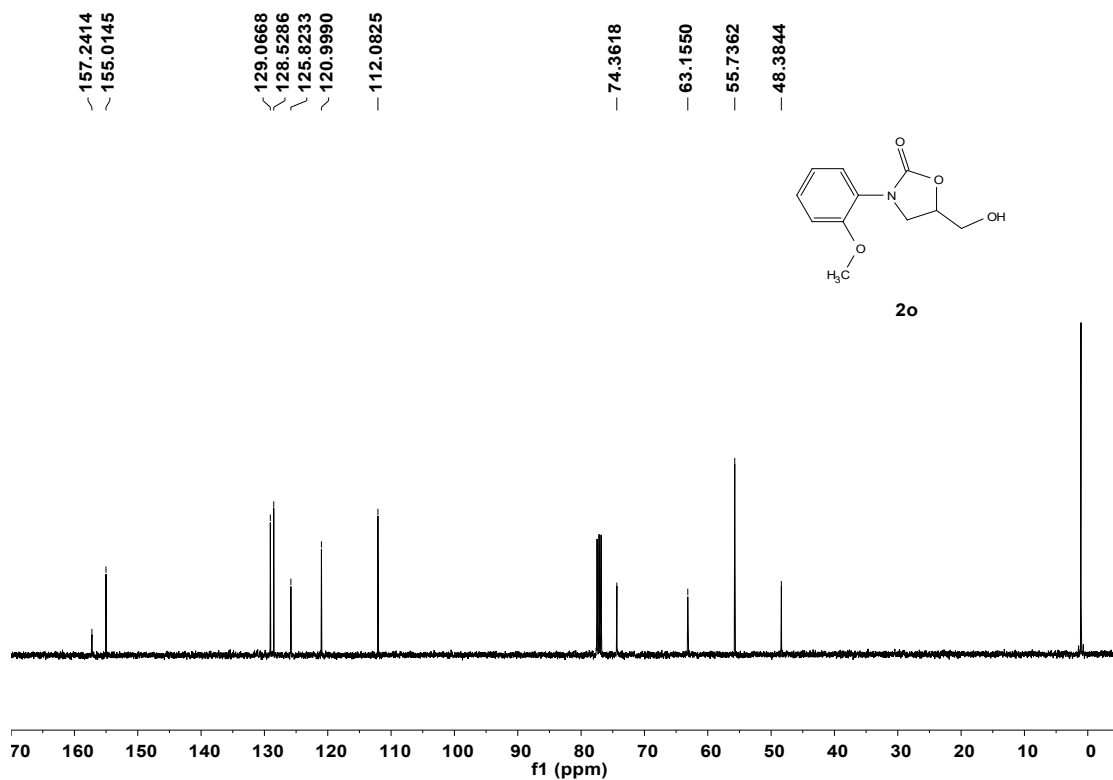

<sup>13</sup>C NMR spectrum (CDCl<sub>3</sub>, 101 MHz) of **2o**

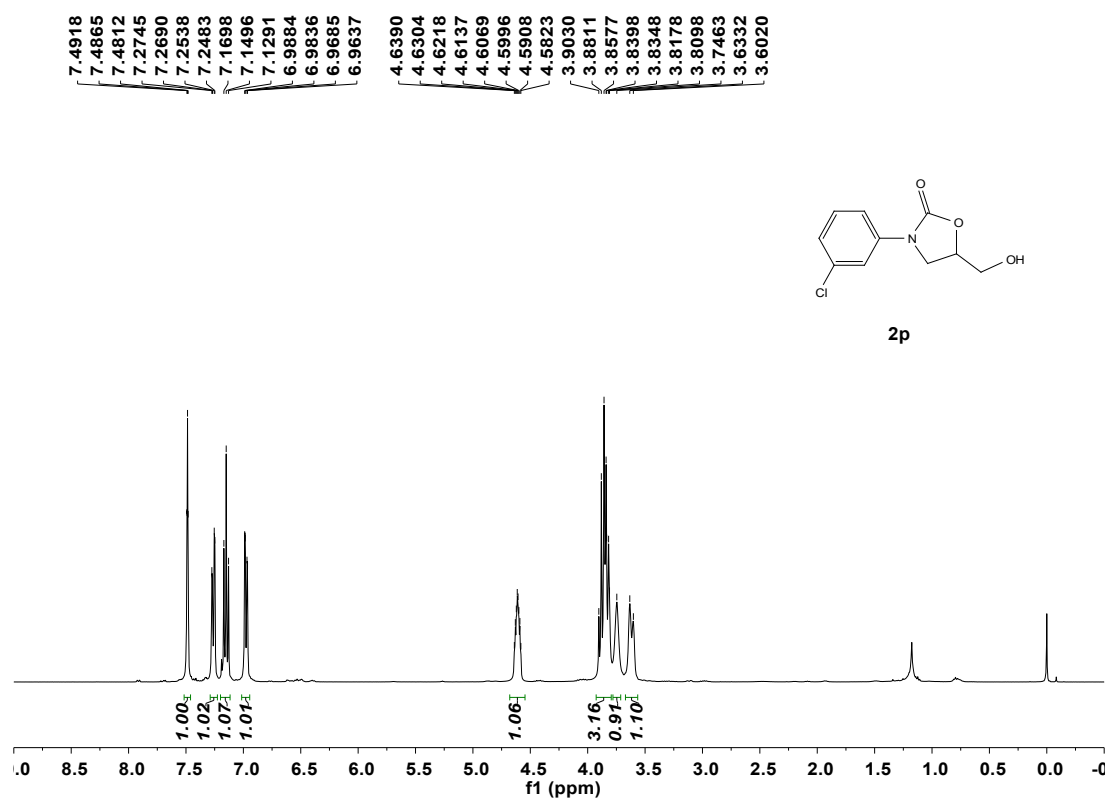

<sup>1</sup>H NMR spectrum (CDCl<sub>3</sub>, 400 MHz) of **2p**

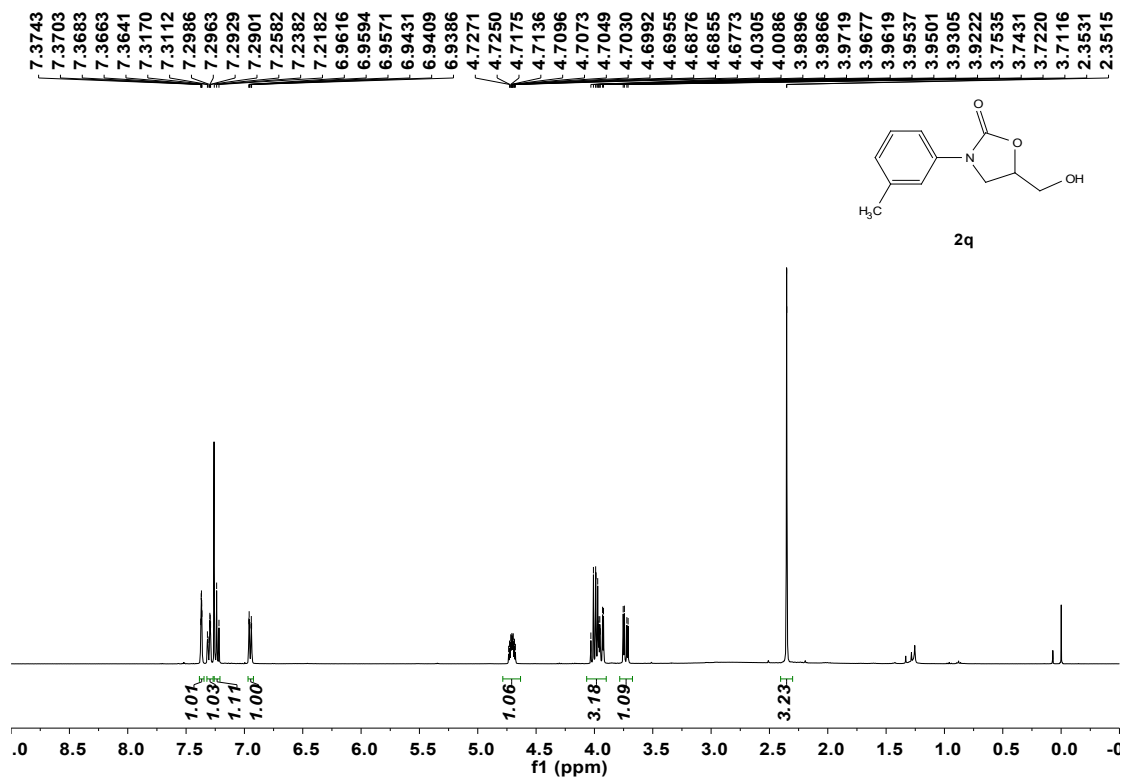

<sup>1</sup>H NMR spectrum (CDCl<sub>3</sub>, 400 MHz) of **2q**

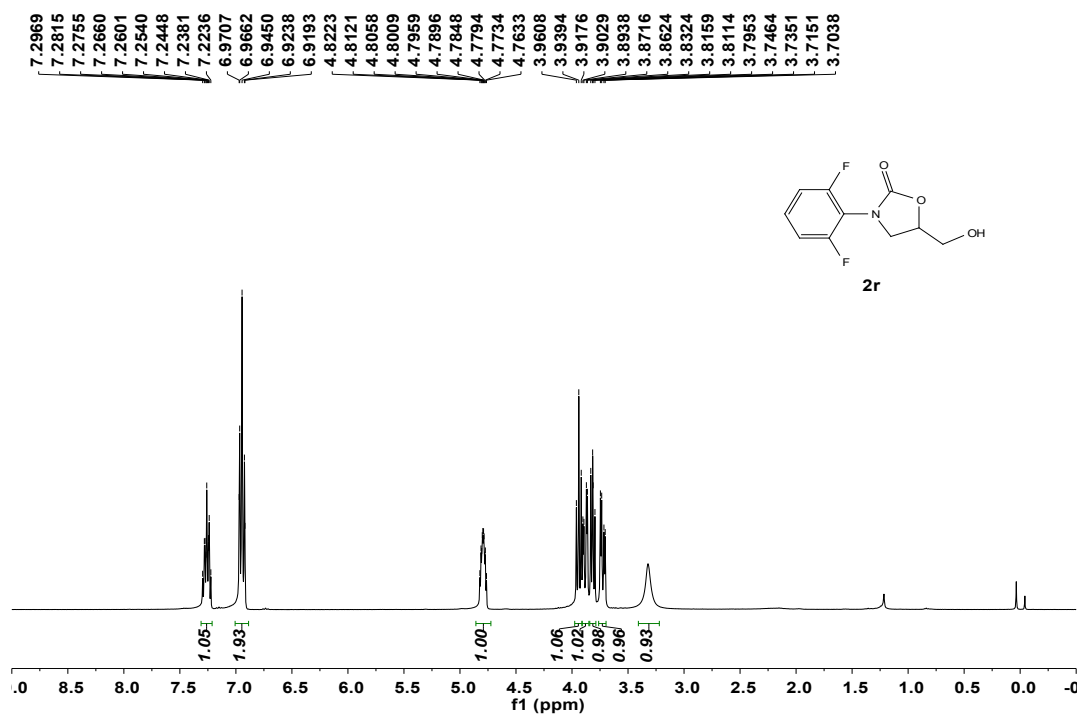

<sup>1</sup>H NMR spectrum (CDCl<sub>3</sub>, 400 MHz) of **2r**

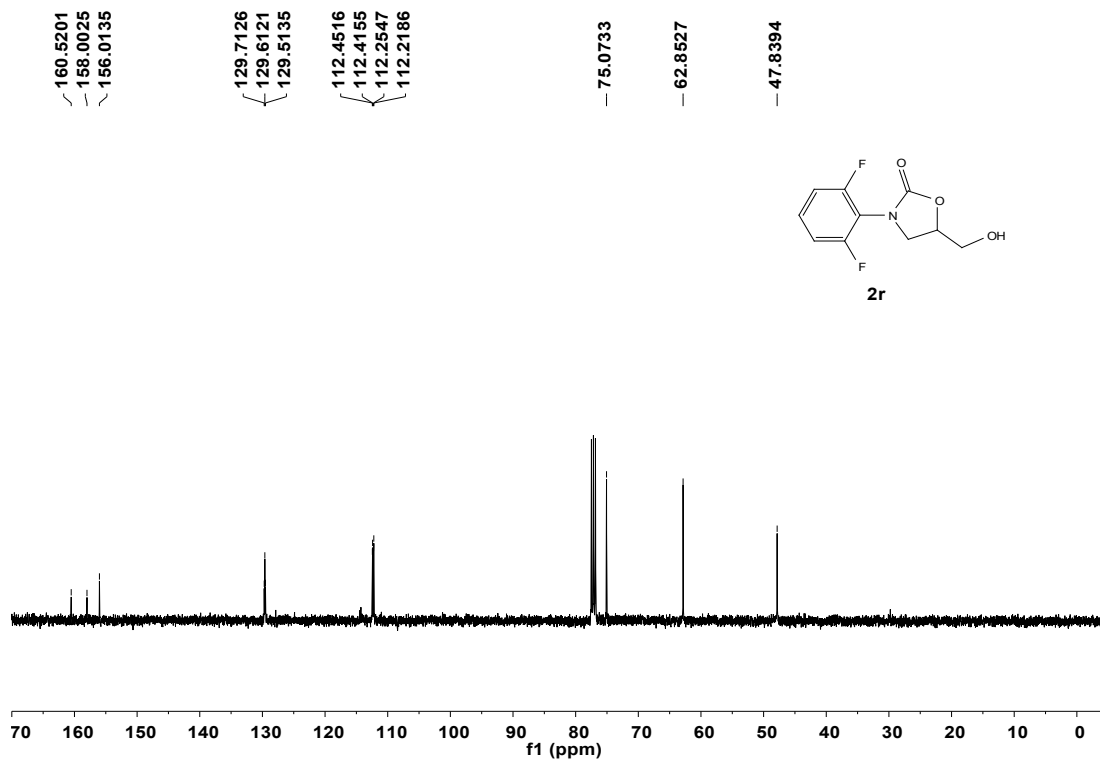

$^{13}\text{C}$  NMR spectrum (CDCl<sub>3</sub>, 101 MHz) of **2r**

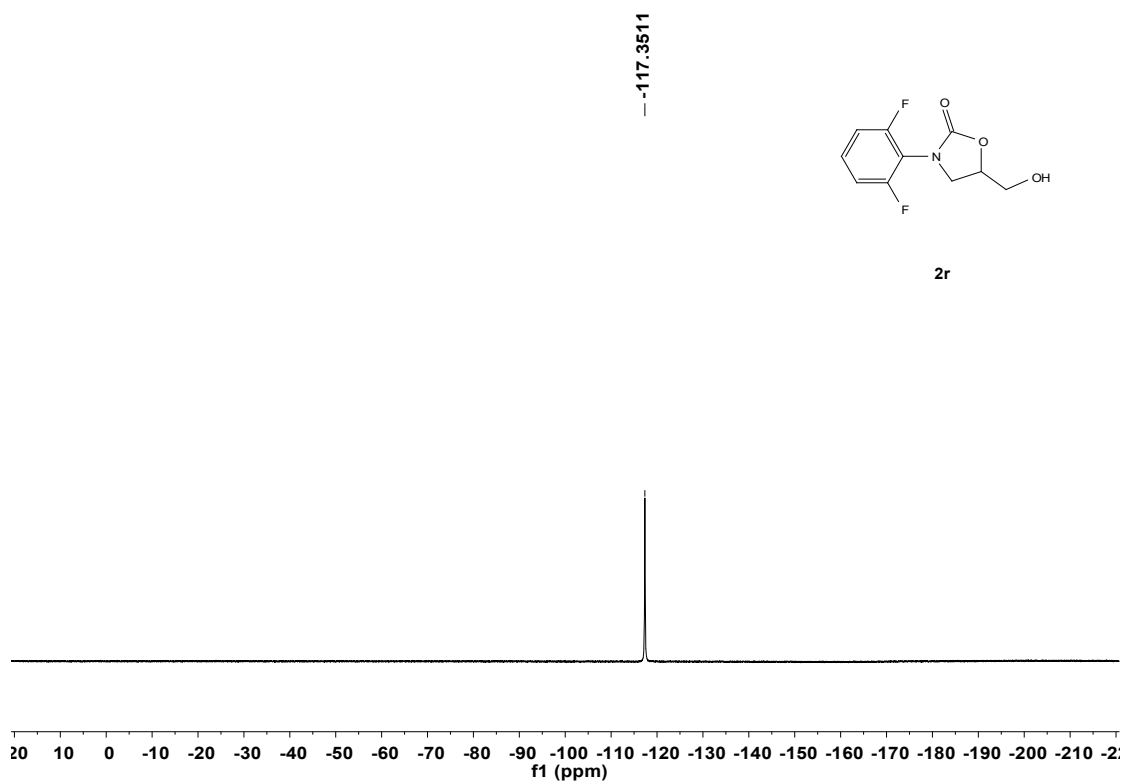

$^{19}\text{F}$  NMR spectrum (CDCl<sub>3</sub>, 376 MHz) of **2r**



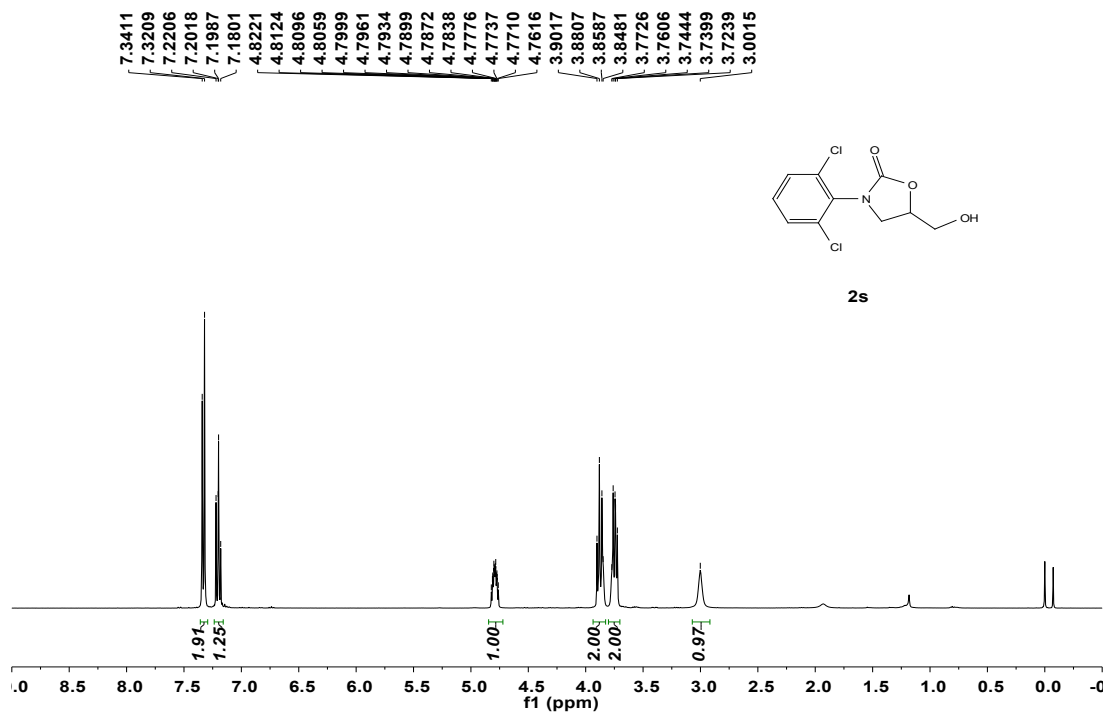

<sup>1</sup>H NMR spectrum (CDCl<sub>3</sub>, 400 MHz) of **2s**

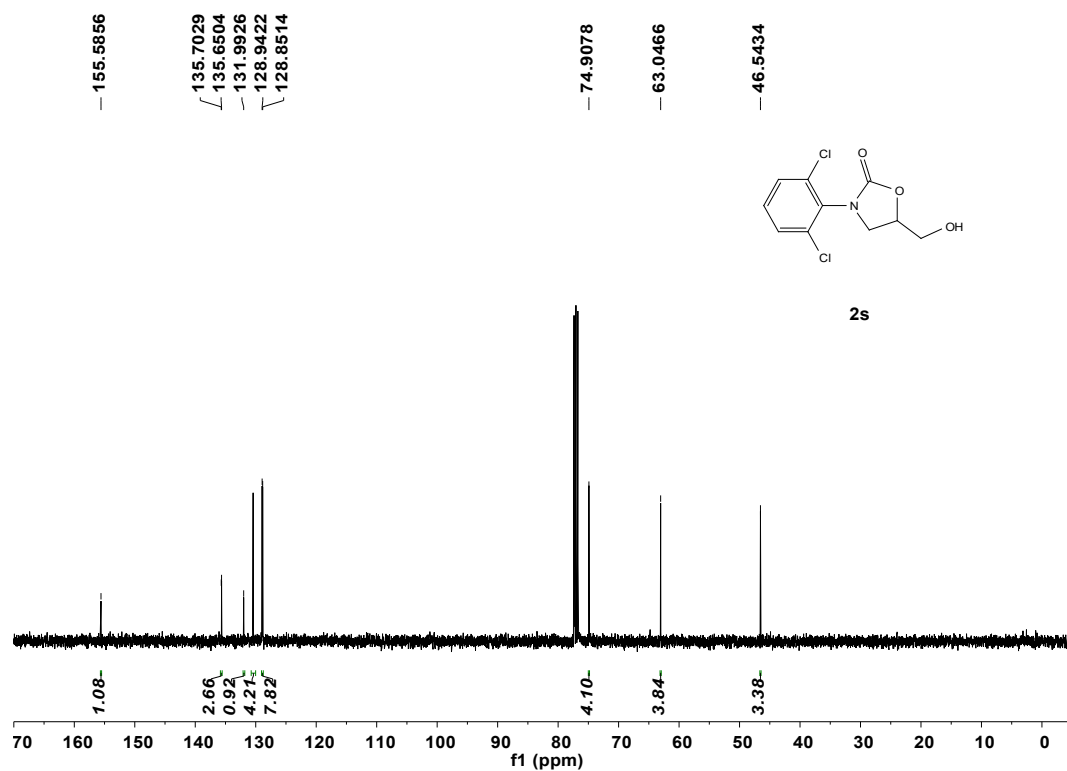

<sup>13</sup>C NMR spectrum (CDCl<sub>3</sub>, 101 MHz) of **2s**

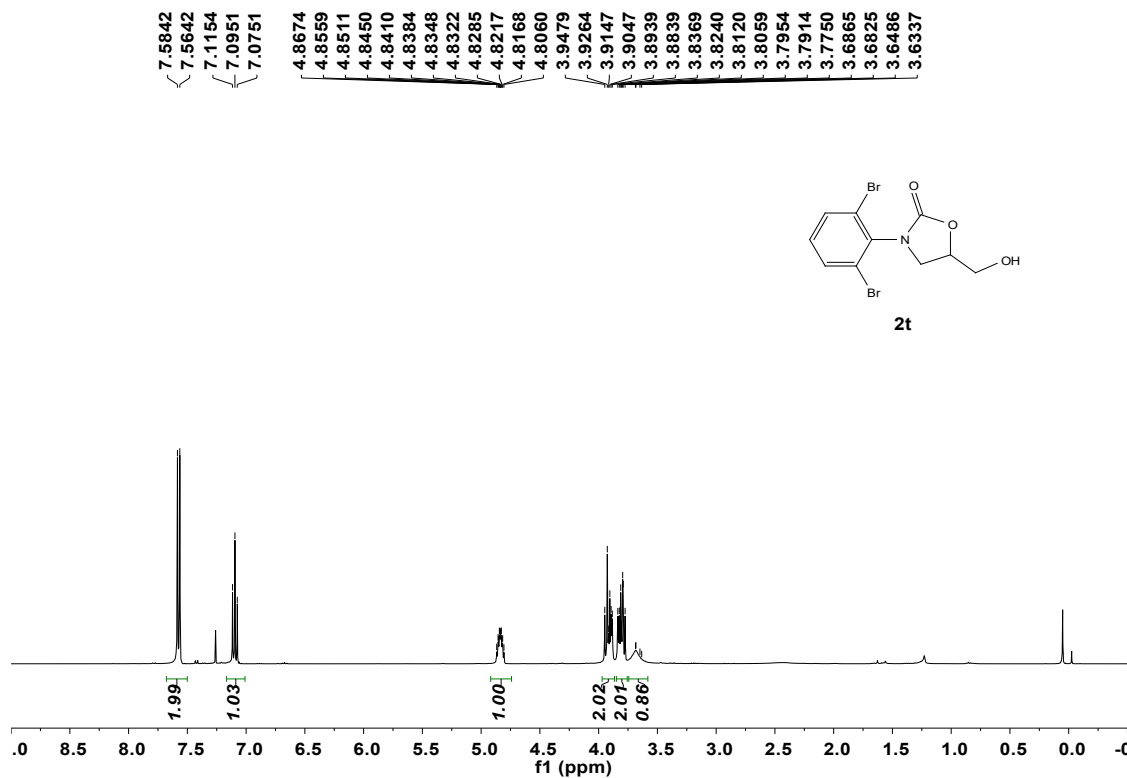

<sup>1</sup>H NMR spectrum (CDCl<sub>3</sub>, 400 MHz) of **2t**

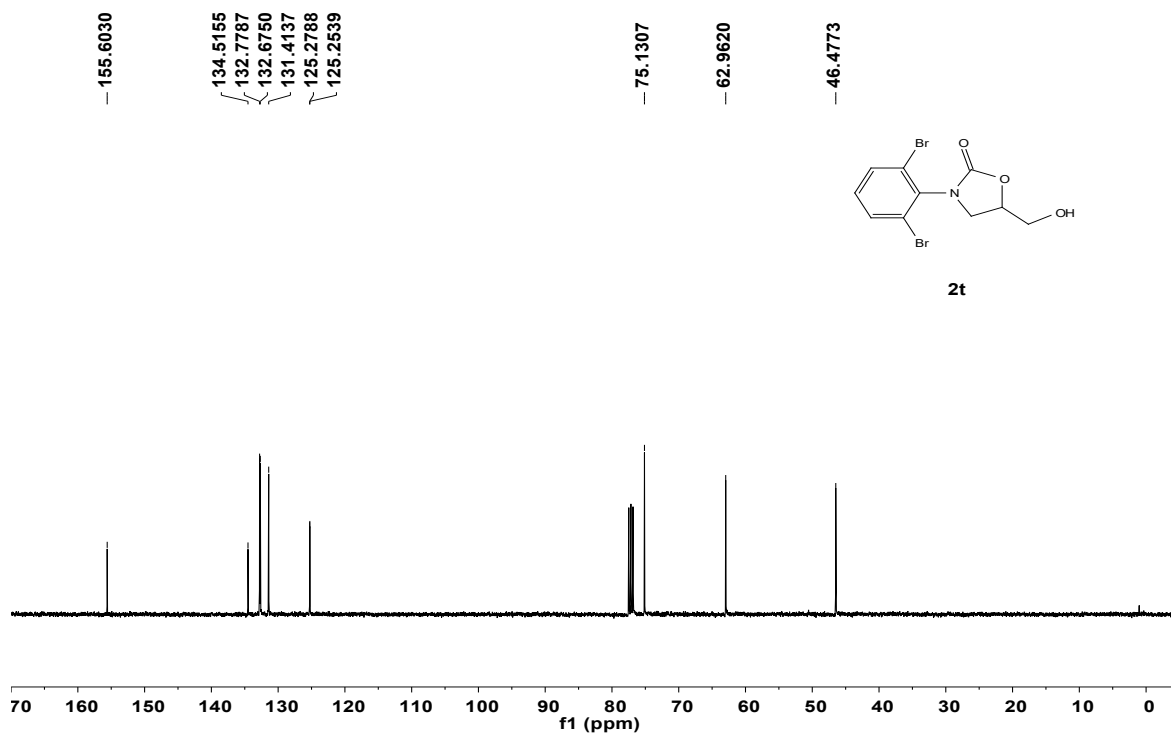

<sup>13</sup>C NMR spectrum (CDCl<sub>3</sub>, 101 MHz) of **2t**

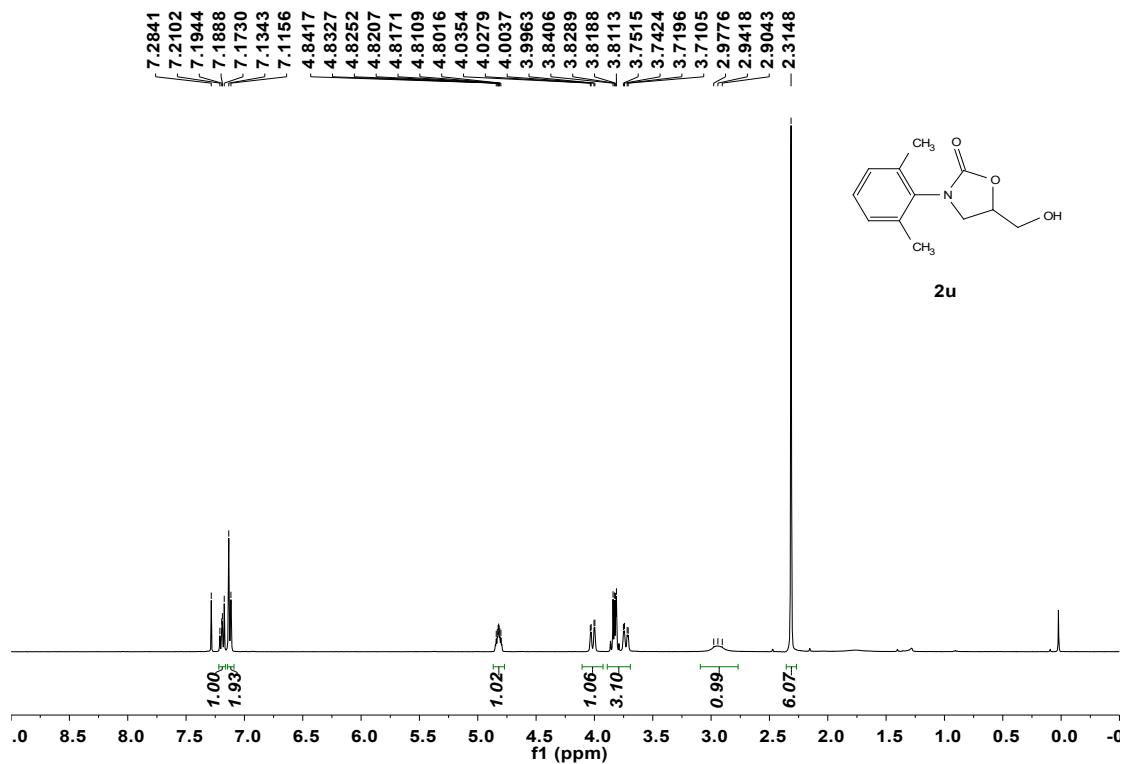

<sup>1</sup>H NMR spectrum (CDCl<sub>3</sub>, 400 MHz) of **2u**

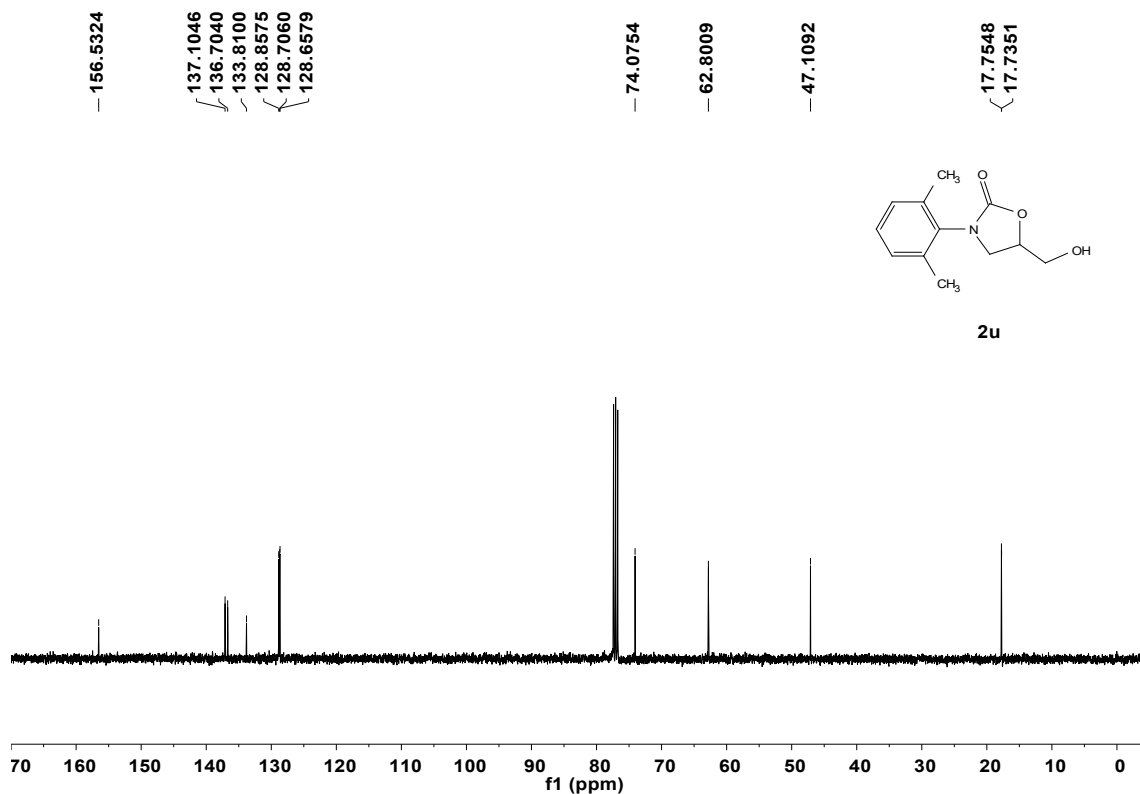

<sup>13</sup>C NMR spectrum (CDCl<sub>3</sub>, 101 MHz) of **2u**

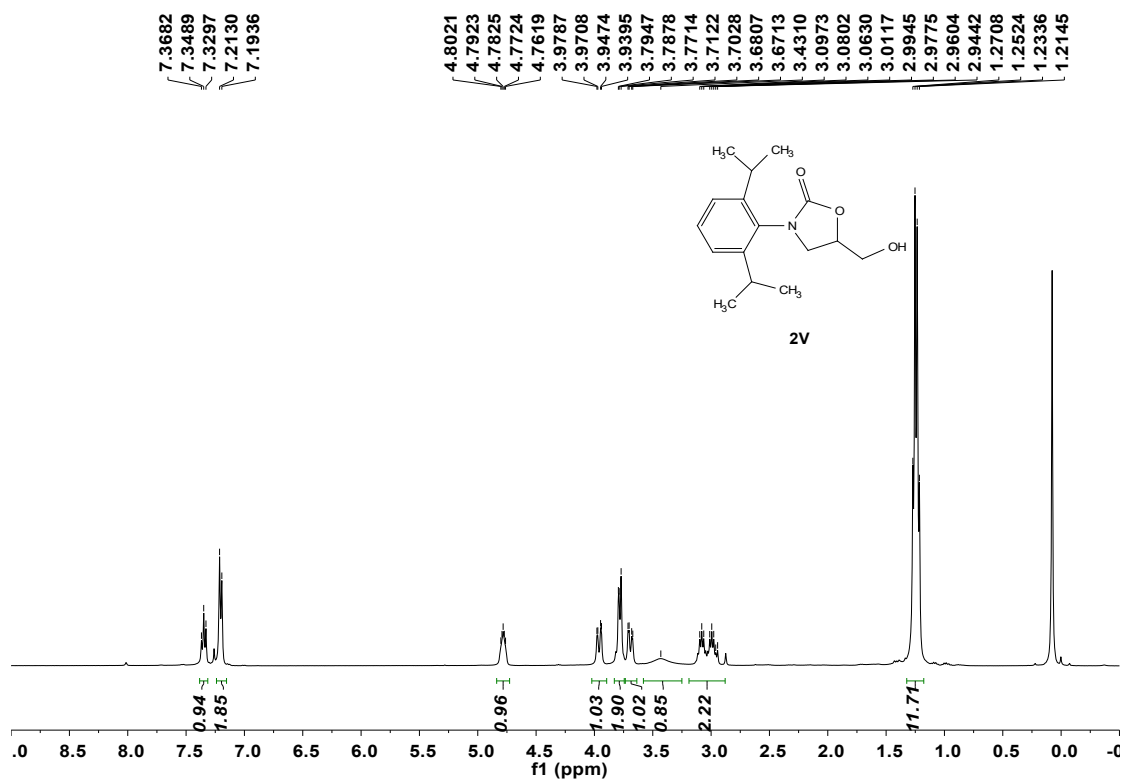

<sup>1</sup>H NMR spectrum (CDCl<sub>3</sub>, 400 MHz) of 2v

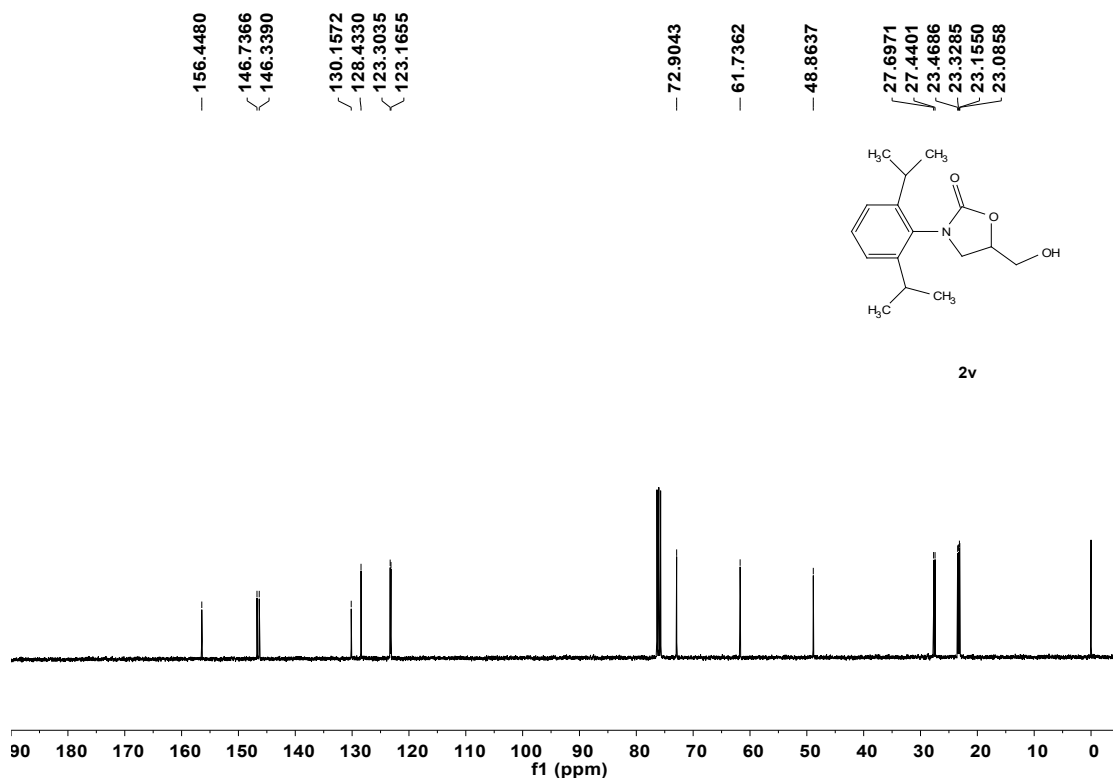

<sup>13</sup>C NMR spectrum (CDCl<sub>3</sub>, 101 MHz) of 2v

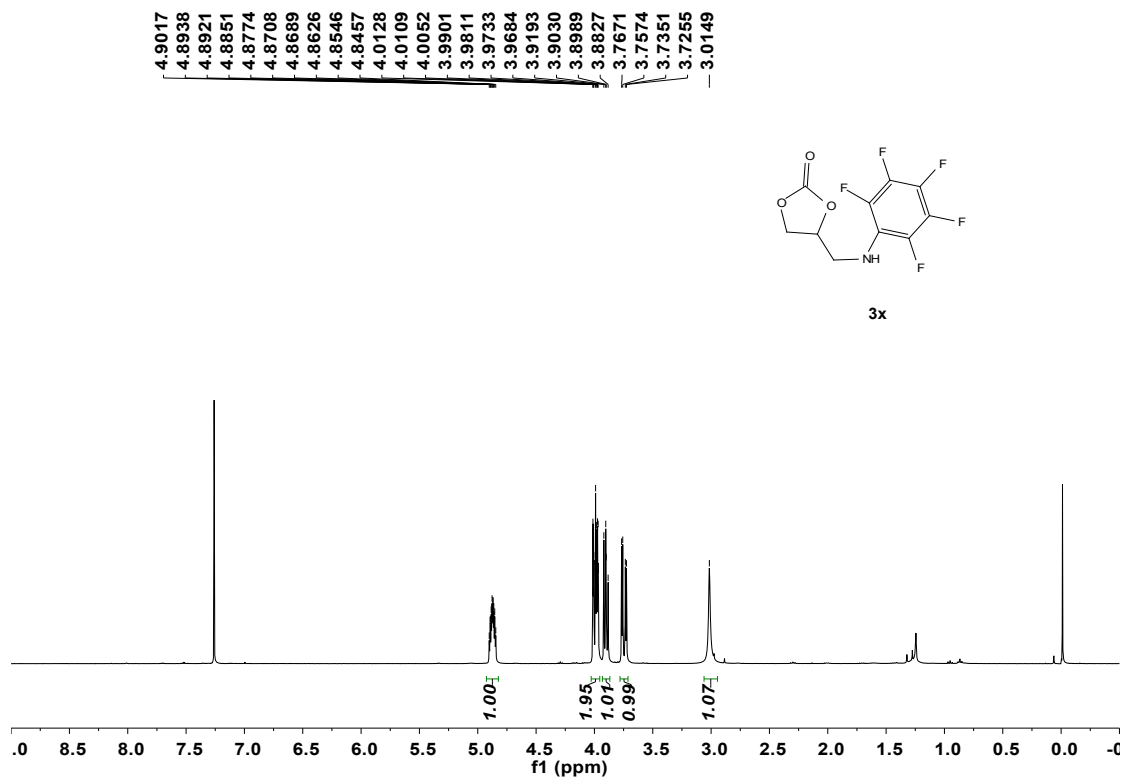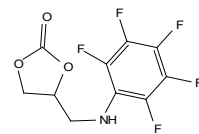

3x

<sup>1</sup>H NMR spectrum (CDCl<sub>3</sub>, 400 MHz) of 3x

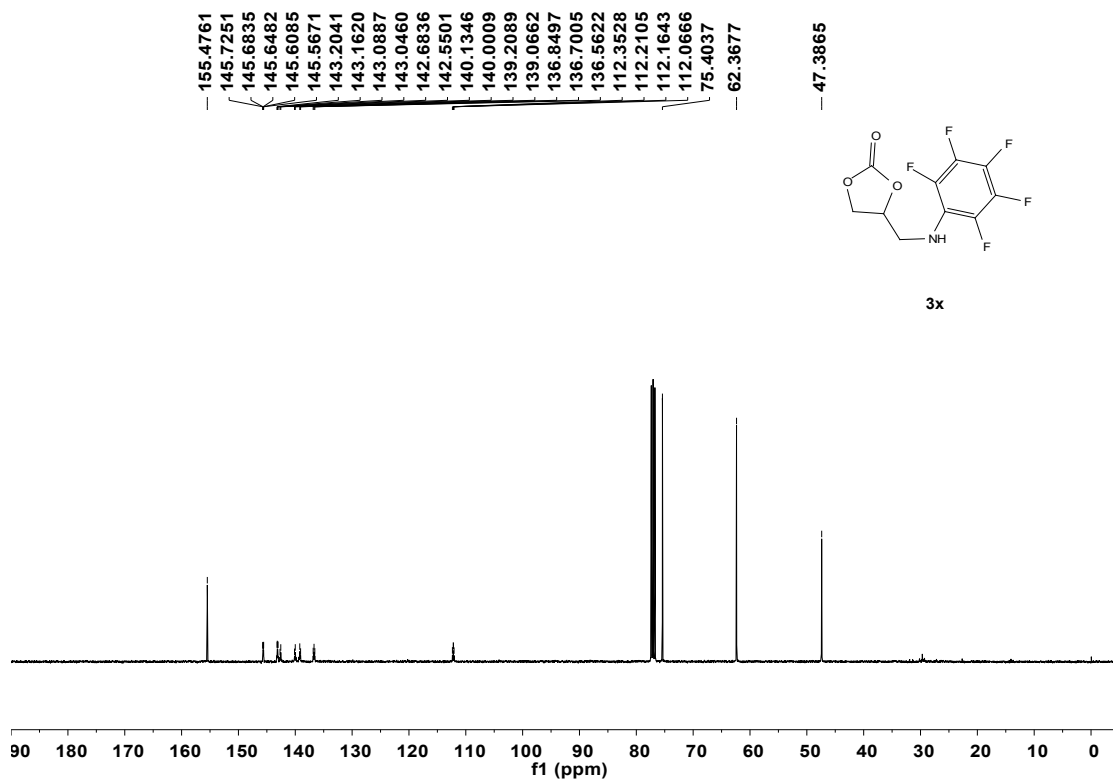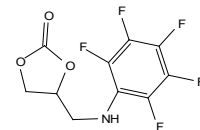

3x

<sup>13</sup>C NMR spectrum (CDCl<sub>3</sub>, 101 MHz) of 3x

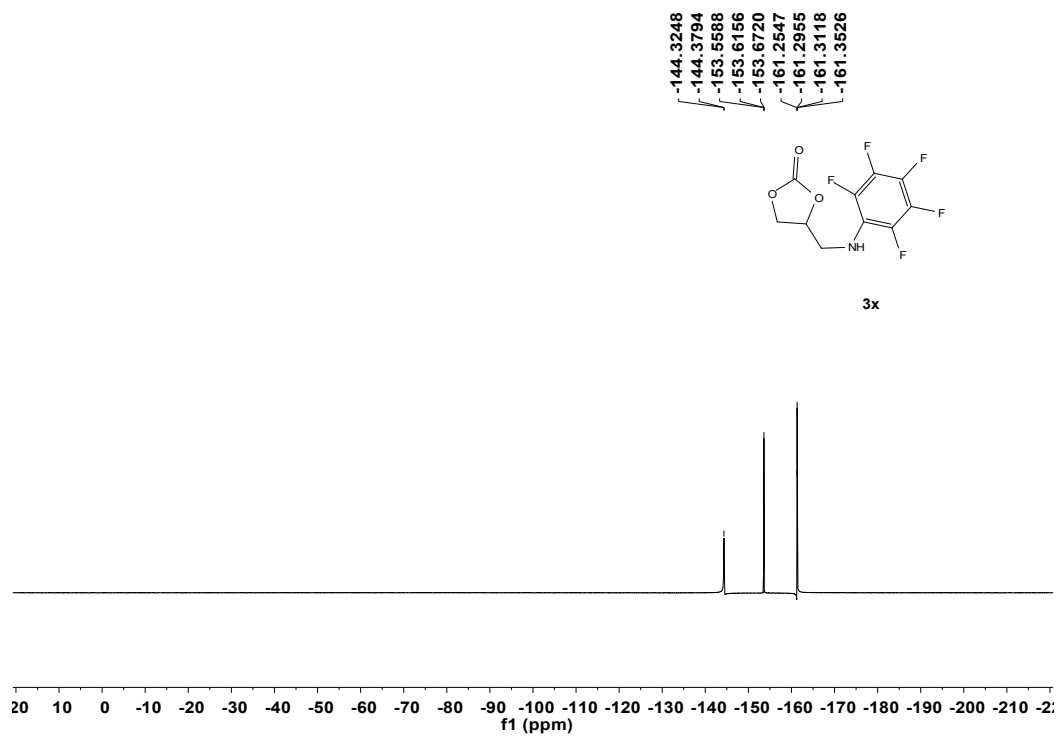

$^{19}\text{F}$  NMR spectrum ( $\text{CDCl}_3$ , 376 MHz) of **3x**

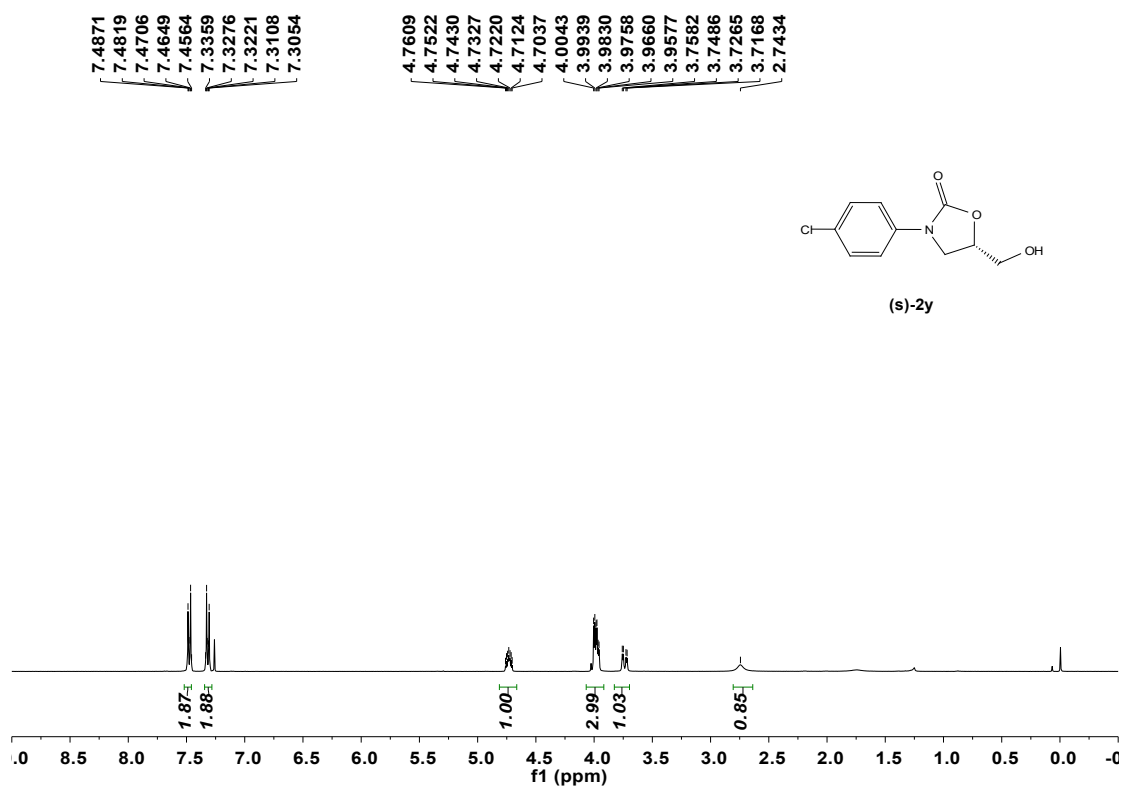

$^1\text{H}$  NMR spectrum ( $\text{CDCl}_3$ , 400 MHz) of (S)-**2y**

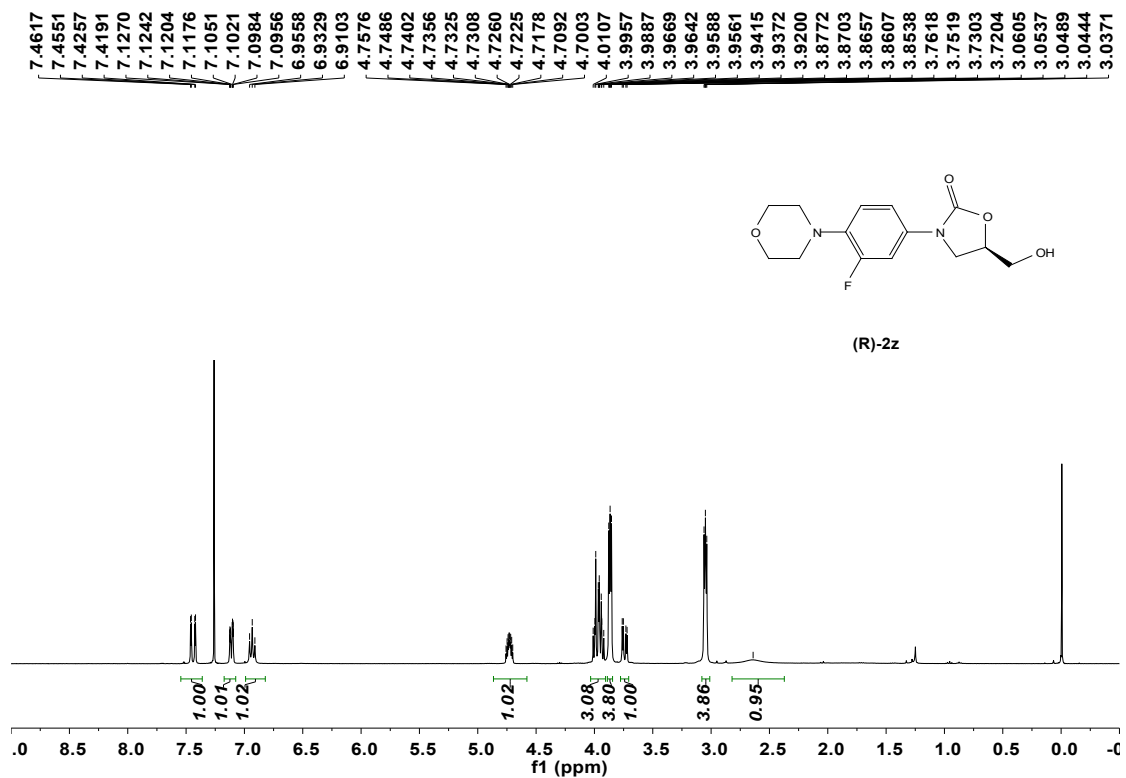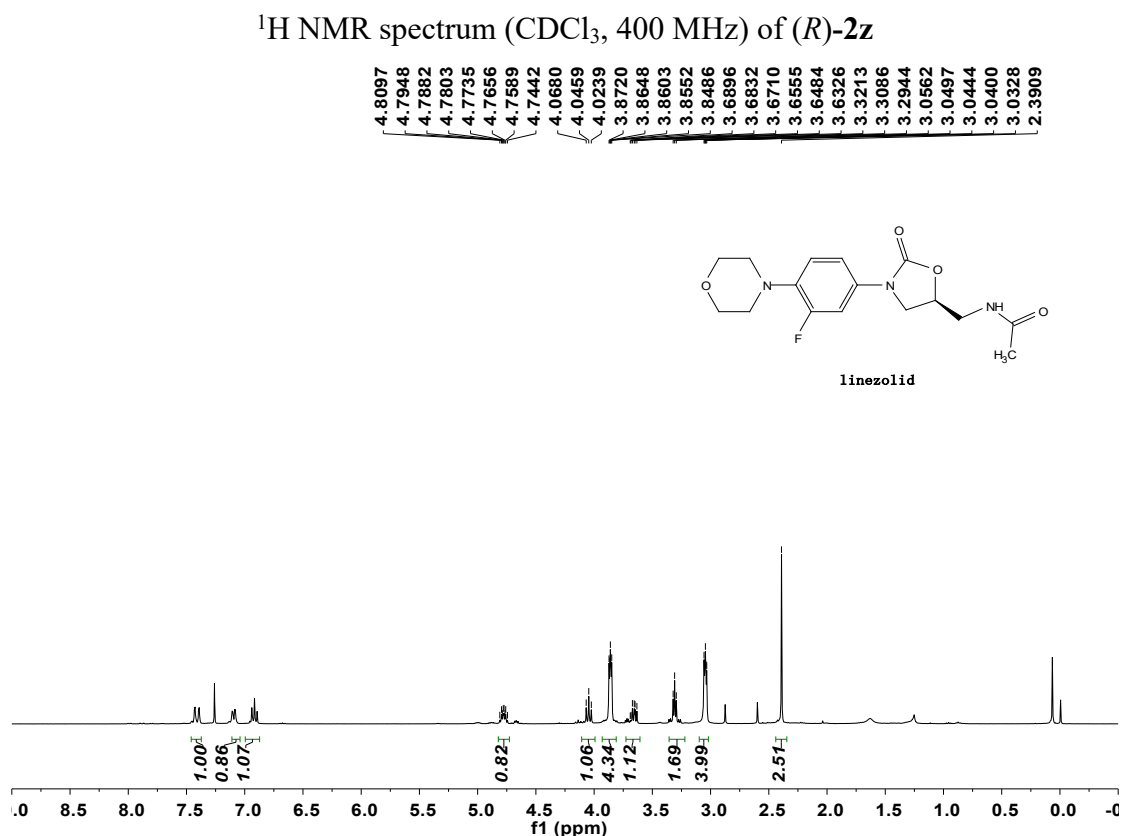

## 9. HPLC spectra.

Fig. S18 HPLC spectra of compound **1y**

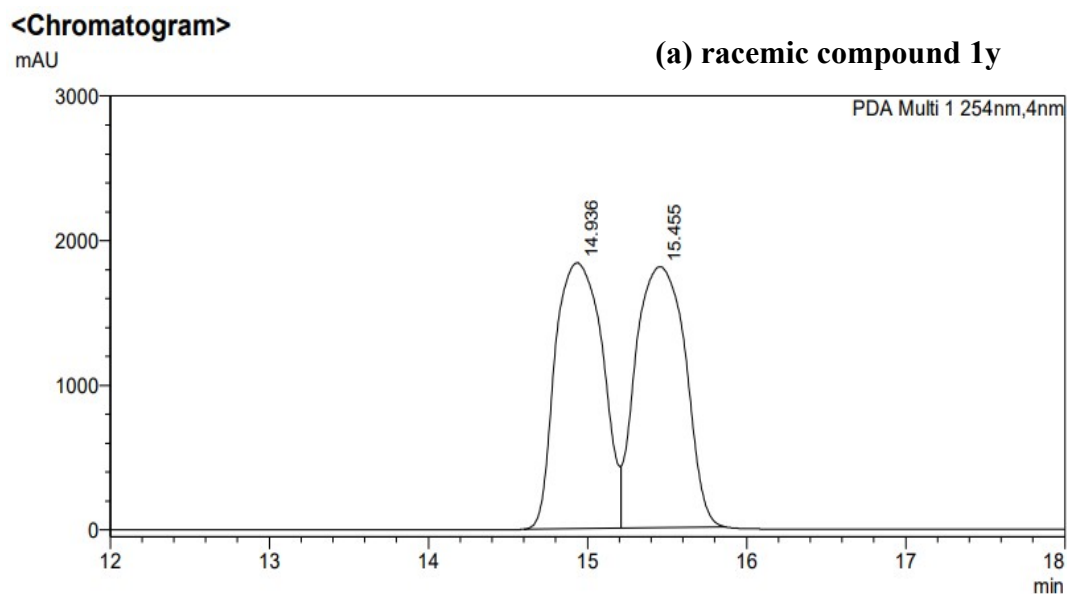

**<Peak Table>**

PDA Ch1 254nm

| Peak# | Ret. Time | Height  | Height% | Area     | Area%   |
|-------|-----------|---------|---------|----------|---------|
| 1     | 14.936    | 1838020 | 50.460  | 38183728 | 49.359  |
| 2     | 15.455    | 1804539 | 49.540  | 39175986 | 50.641  |
| Total |           | 3642559 | 100.000 | 77359713 | 100.000 |

**<Chromatogram>** (b) chiral compound **1y**

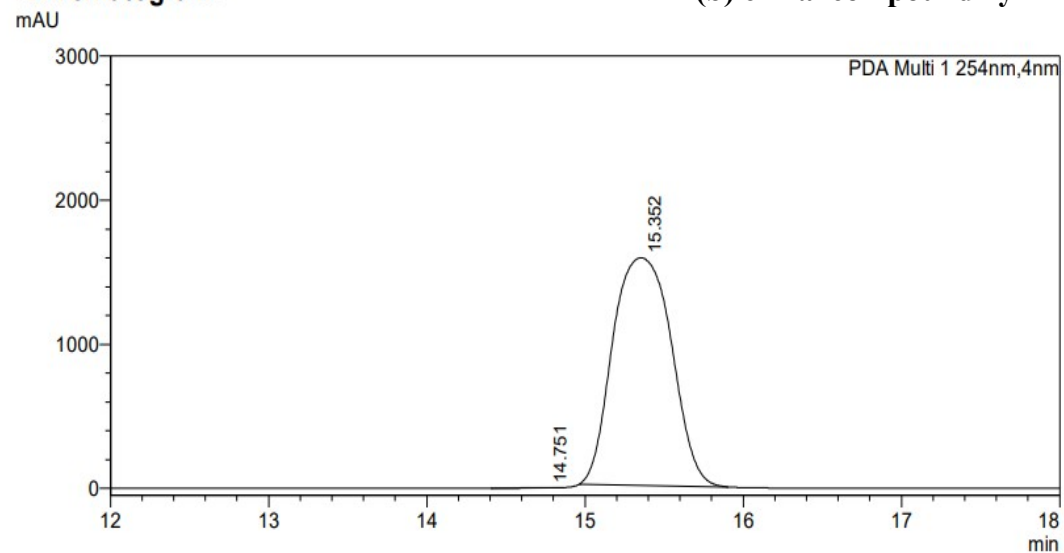

**<Peak Table>**

PDA Ch1 254nm

| Peak# | Ret. Time | Height  | Height% | Area     | Area%   |
|-------|-----------|---------|---------|----------|---------|
| 1     | 14.751    | 1915    | 0.121   | 20334    | 0.050   |
| 2     | 15.352    | 1577947 | 99.879  | 40781243 | 99.950  |
| Total |           | 1579862 | 100.000 | 40801578 | 100.000 |



**Fig. S19** HPLC spectra of compound **1z**

**<Chromatogram>**

mAU

**(a) racemic compound 1z**

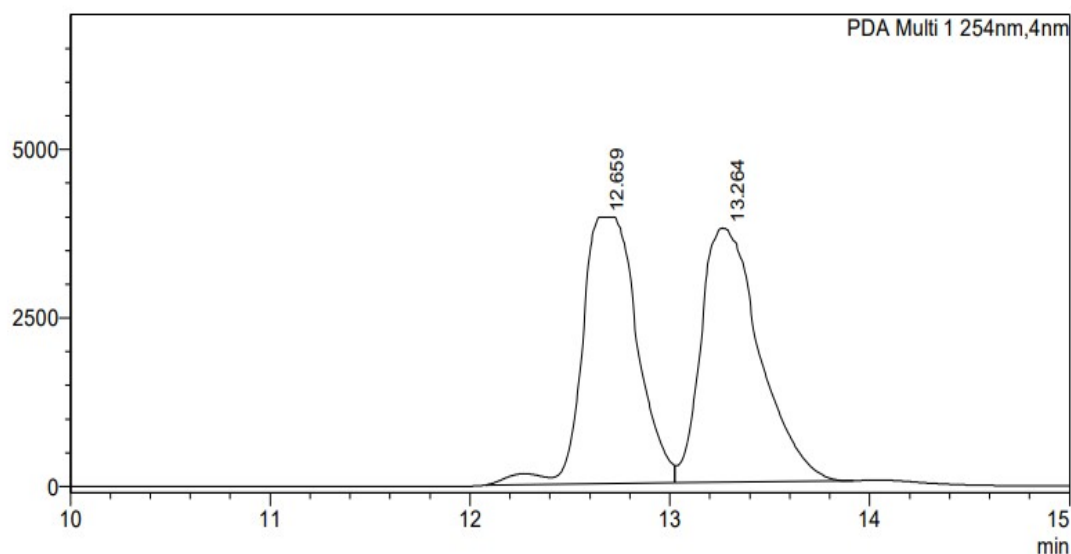

**<Peak Table>**

PDA Ch1 254nm

| Peak# | Ret. Time | Height  | Height% | Area      | Area%   |
|-------|-----------|---------|---------|-----------|---------|
| 1     | 12.659    | 3959500 | 51.219  | 75687006  | 49.548  |
| 2     | 13.264    | 3771036 | 48.781  | 77069337  | 50.452  |
| Total |           | 7730537 | 100.000 | 152756344 | 100.000 |

**<Chromatogram>**

mAU

**(b) chiral compound 1z**

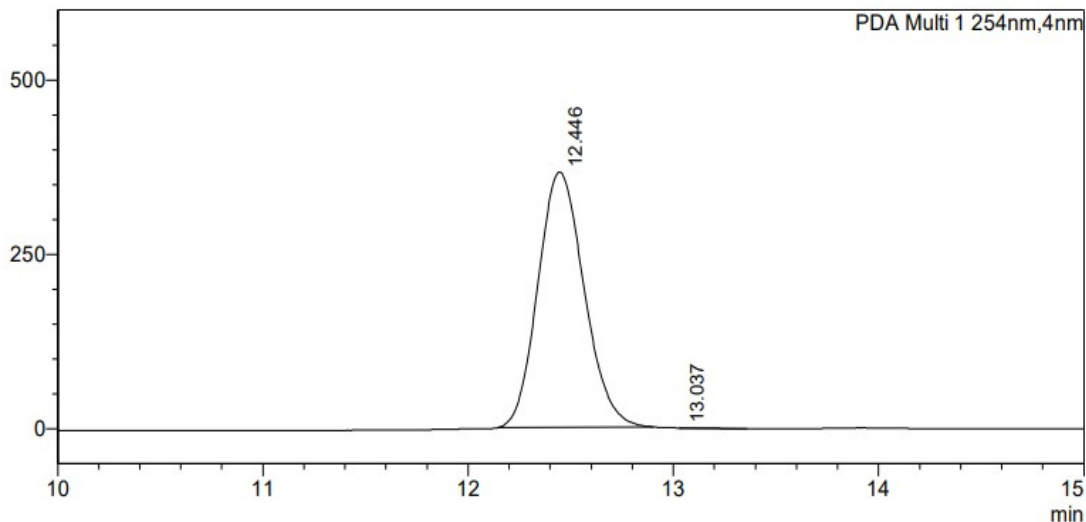

**<Peak Table>**

PDA Ch1 254nm

| Peak# | Ret. Time | Height | Height% | Area    | Area%   |
|-------|-----------|--------|---------|---------|---------|
| 1     | 12.446    | 365583 | 99.997  | 5727033 | 99.979  |
| 2     | 13.037    | 9      | 0.003   | 1199    | 0.021   |
| Total |           | 365593 | 100.000 | 5728233 | 100.000 |

Fig. S20 HPLC spectra of compound 2y

<Chromatogram>

mAU

(a) racemic compound 2y

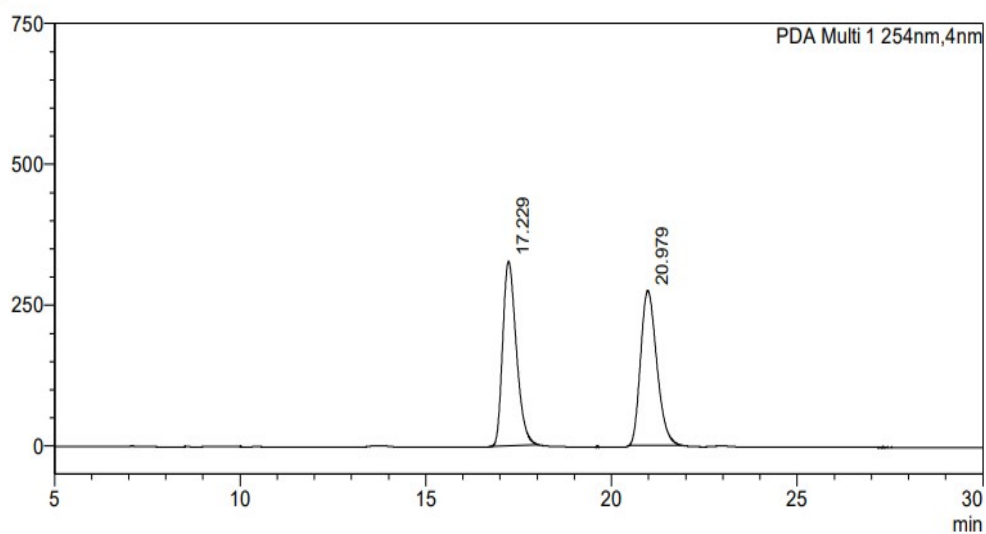

<Peak Table>

PDA Ch1 254nm

| Peak# | Ret. Time | Height | Height% | Area     | Area%   |
|-------|-----------|--------|---------|----------|---------|
| 1     | 17.229    | 327600 | 54.428  | 8376278  | 50.194  |
| 2     | 20.979    | 274291 | 45.572  | 8311509  | 49.806  |
| Total |           | 601891 | 100.000 | 16687786 | 100.000 |

<Chromatogram>

mAU

(b) chiral compound 2y

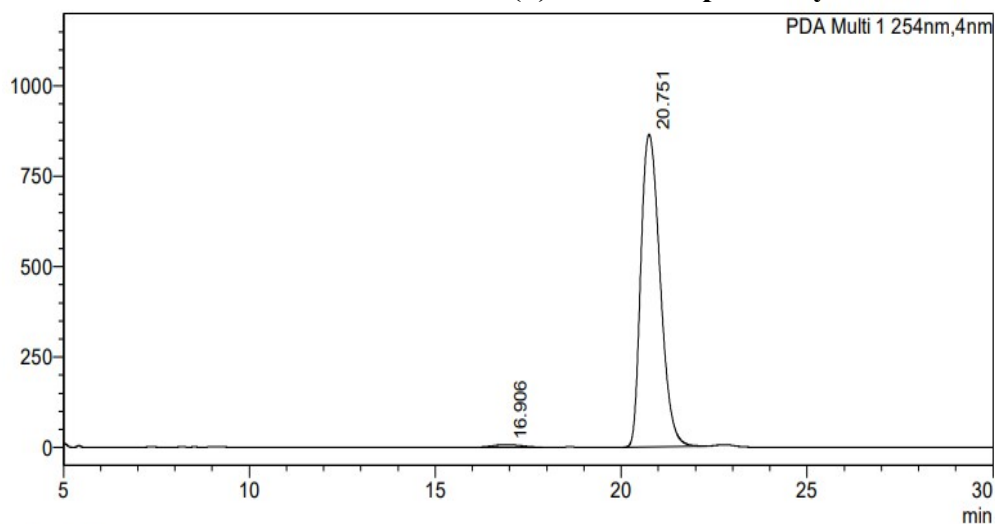

<Peak Table>

PDA Ch1 254nm

| Peak# | Ret. Time | Height | Height% | Area     | Area%   |
|-------|-----------|--------|---------|----------|---------|
| 1     | 16.906    | 6481   | 0.744   | 325069   | 1.035   |
| 2     | 20.751    | 864709 | 99.256  | 31085854 | 98.965  |
| Total |           | 871190 | 100.000 | 31410923 | 100.000 |

**Fig. S21** HPLC spectra of compound **2z**

**<Chromatogram>**

**(a) racemic compound 2z**

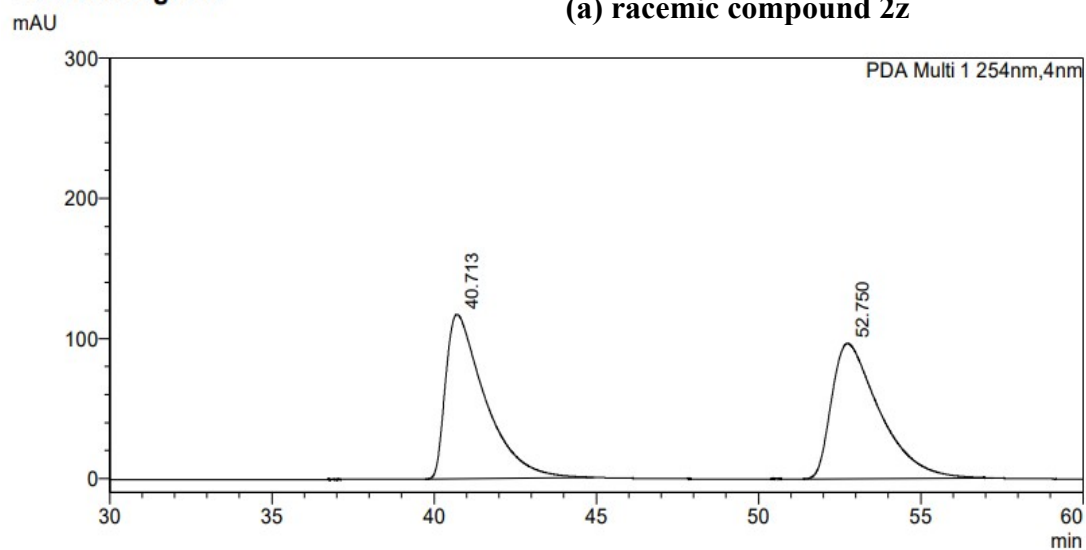

**<Peak Table>**

| PDA Ch1 254nm |           |        |         |          |         |
|---------------|-----------|--------|---------|----------|---------|
| Peak#         | Ret. Time | Height | Height% | Area     | Area%   |
| 1             | 40.713    | 117346 | 54.876  | 9942096  | 50.039  |
| 2             | 52.750    | 96493  | 45.124  | 9926731  | 49.961  |
| Total         |           | 213838 | 100.000 | 19868828 | 100.000 |

**<Chromatogram>**

**(b) chiral compound 2z**

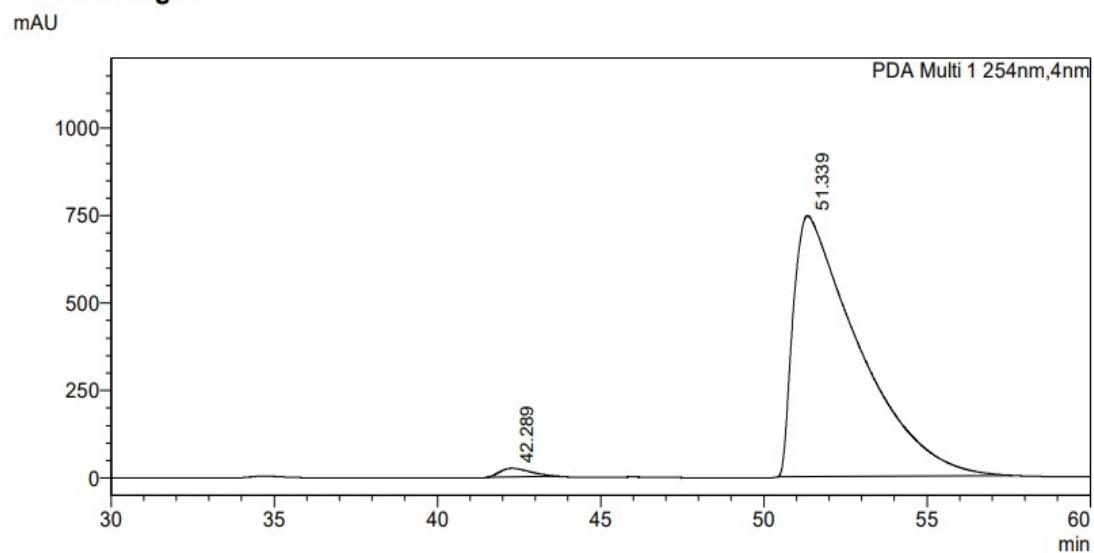

**<Peak Table>**

| PDA Ch1 254nm |           |        |         |           |         |
|---------------|-----------|--------|---------|-----------|---------|
| Peak#         | Ret. Time | Height | Height% | Area      | Area%   |
| 1             | 42.289    | 24961  | 3.238   | 1621601   | 1.537   |
| 2             | 51.339    | 745851 | 96.762  | 103872724 | 98.463  |
| Total         |           | 770813 | 100.000 | 105494324 | 100.000 |

## 10. Reference

1. Y. Lee, J. Choi and H. Kim, Stereocontrolled, divergent, Al(III)-catalyzed coupling of chiral N-aryl epoxy amines and CO<sub>2</sub>, *Org. Lett.* 2018, **20**, 5036.
2. J. Sun, W. Cheng, Z. Yang, J. Wang, T. Xu, J. Xin and S. Zhang, Superbase/cellulose: an environmentally benign catalyst for chemical fixation of carbon dioxide into cyclic carbonates, *Green Chem.*, 2014, **16**, 3071.
3. T. Rodima, I. Kaljurand, A. Pihl, V. Mäemets, I. Leito and I. A. Koppel, Acid-base equilibria in nonpolar media. 2.1 Self-consistent basicity scale in thf solution ranging from 2-methoxypyridine to etp1(pyrr) phosphazene, *J. Org. Chem.*, 2002, **67**, 1873.
4. pka, <https://www.chemicalbook.com>, (accessed May 2022).
5. C. Jiang, J. Yan, Y. Lin and Y. Guan, NEO-DANKONG, CN105111160A, 2015.
6. J. Y. Do, S. B. Shin, S. M. Jeong and M.-Y. Jung, Ring-opening polymerization of cyclic 1,3-oxathiolane-2-thione promoted by neighboring sulfide group and ring contraction, *Eur. Polym. J.*, 2020, **131**, 109689.
7. Y. Hao, D. Yuan and Y. Yao, Metal-free cycloaddition of epoxides and carbon dioxide catalyzed by triazole-bridged bisphenol, *ChemCatChem*, 2020, **12**, 4346.
8. A. Helal, K. E. Cordova, M. E. Arafat, M. Usman and Z. H. Yamani, Defect-engineering a metal-organic framework for CO<sub>2</sub> fixation in the synthesis of bioactive oxazolidinones. *Inorg. Chem. Front.*, 2020, **7**, 3571.
9. J. Zha, T. Ding, J. Chen, R. Wang, G. Gao and F. Xia, Reaction Mechanism of CO<sub>2</sub> and Styrene Oxide Catalyzed by Ionic Liquids: A Combined DFT Calculation and Experimental Study. *J. Phys. Chem. A*, 2020, **124**, 7991.
10. A. D. Becke, Density-functional thermochemistry. III. The role of exact exchange, *J. Chem. Phys.* 1993, **98**, 5648.
11. P. C. Hariharan and J. The influence of polarization functions on molecular orbital hydrogenation energies, A. Pople *Theor. Chim. Acta* 1973, **28**, 213.

12. K. Fukui, The path of chemical reactions - the IRC approach, *Acc. Chem. Res.* 1981, **14**, 363.
13. Y. Zhao and D. G. Truhlar, Density functionals with broad applicability in chemistry, *Acc. Chem. Res.* 2008, **41**, 157.
14. Y. Zhao and D. G. Truhlar, The M06 suite of density functionals for main group thermochemistry, thermochemical kinetics, noncovalent interactions, excited states, and transition elements: two new functionals and systematic testing of four M06-class functionals and 12 other functionals, *Theor. Chem. Acc.* 2008, **120**, 215.
15. A. V. Marenich, C. J. Cramer and D. G. Truhlar, Universal solvation model based on solute electron density and on a continuum model of the solvent defined by the bulk dielectric constant and atomic surface tensions, *J. Phys. Chem. B* 2009, **113**, 6378.
16. M. J. Frisch, G. W. Trucks, H. B. Schlegel, G. E. Scuseria, M. A. Robb, J. R. Cheeseman, G. Scalmani, V. Barone, B. Mennucci, G. A. Petersson, H. Nakatsuji, M. Caricato, X. Li, H. P. Hratchian, A. F. Izmaylov, J. Bloino, G. Zheng, J. L. Sonnenberg, M. Hada, M. Ehara, K. Toyota, R. Fukuda, J. Hasegawa, M. Ishida, T. Nakajima, Y. Honda, O. Kitao, H. Nakai, T. Vreven, J. A. Montgomery Jr., J. E. Peralta, F. Ogliaro, M. Bearpark, J. J. Heyd, E. Brothers, K. N. Kudin, V. N. Staroverov, R. Kobayashi, J. Normand, K. Raghavachari, A. Rendell, J. C. Burant, S. S. Iyengar, J. Tomasi, M. Cossi, N. Rega, J. M. Millam, M. Klene, J. E. Knox, J. B. Cross, V. Bakken, C. Adamo, J. Jaramillo, R. Gomperts, R. E. Stratmann, O. Yazyev, A. J. Austin, R. Cammi, C. Pomelli, J. W. Ochterski, R. L. Martin, K. Morokuma, V. G. Zakrzewski, G. A. Voth, P. Salvador, J. J. Dannenberg, S. Dapprich, A. D. Daniels, Ö. Farkas, J. B. Foresman, J. V. Ortiz, J. Cioslowski and D. J. Fox, Gaussian 09, Revision C.01, Gaussian, Inc., Wallingford CT, 2010.
